# Supplementary material for: Chemoselective carbene insertion into the N−H bonds of NH3·H2O
Source: Research Square preprint supplement (doi:10.21203/rs.3.rs-1947996/v1), 2022-09-09
Supplement: Supplementary file 1 [file bc4e29911aa9fd2b27c2d222.docx]

*Supplementary Information for*

**Chemoselective carbene insertion into the N–H bonds of NH3·H2O**

Zhaohong Liu,**†**1 Yong Yang,**†**1 Qingmin Song,1 Linxuan Li,1 Giuseppe Zanoni,2 Shaopeng Liu1, Meng Xiang,1 Edward A. Anderson3 and Xihe Bi1,4,5*

1 Department of Chemistry, Northeast Normal University, Changchun 130024, China.

2 Department of Chemistry, University of Pavia; Viale Taramelli 12, 27100, Pavia, Italy.

3 Chemistry Research Laboratory, University of Oxford, 12 Mansfield Road, Oxford, OX1 3TA, U.K..

4 State Key Laboratory of Elemento-Organic Chemistry, Nankai University, Tianjin 300071, China.

5 Lead Contact.

*Correspondence: bixh507@nenu.edu.cn

Table of Contents

| 1. General Information | | S2 |
| --- | --- | --- |
| 1. Optimization of Reaction Conditions | | S2 |
| 1. Typical Procedure For N–H Bond Insertion of NH3·H2O And Analytical Data | | S4 |
| 1. Preparation of Starting Materials | | S28 |
|  | 4.1 Synthesis and analytical data of new diazo compounds | S28 |
|  | 4.2 Synthesis and analytical data of *N*-triftosylhydrazones | S31 |
| 1. Synthetic Applications | | S36 |
|  | 5.1 Gram-scale experiments | S36 |
|  | 5.2 Late-stage modification of bioactive and drugs molecules | S36 |
| 1. Mechanistic Studies | | S40 |
|  | 6.1 Control experiments | S40 |
|  | 6.2 Computational studies | S42 |
| 1. NMR Spectra of Products | | S95 |
| 1. References | | S181 |

1. **General Information**

**1.1 Equipment and methods**

The products were purified by column chromatography over silica gel. NMR spectra were recorded on a Brüker Advance 600 (1H: 600 MHz, 13C:151 MHz) and Brüker Advance 500 (1H: 500 MHz; 13C: 126 MHz) at ambient temperature. The following residual solvent signals were used as references for 1H and 13C NMR spectra: CDCl3, δH 0.00 ppm (relative to TMS), δC 77.00 ppm; DMSO-d6, δH 2.50 ppm, δC 40.00 ppm. 19F NMR chemical shifts were determined relative to CFCl3 as outside standard and low field is positive. The following abbreviations were used to explain the multiplicities: s = singlet, d = doublet, t = triplet, q = quartet, qi = quintet, m = multiplet, br = broad. Thin layer chromatographic (TLC) analysis was performed with glass-backed silica gel plates, visualizing with UV light (254 nm) and/or staining with aqueous KMnO4 stain. High-resolution mass spectra (HRMS) were recorded on Magnetic Sector High Resolution Gas Chromatography-Mass Spectra and Q Exactive Focus (Thermal) by using ESI method. IR was recorded on Nicolet 6700 spectrometer. Melting points were determined with XRC-1 and are uncorrected.

**1.2 Solvents and reagents**

All reagents were purchased from commercial sources and used without purification unless otherwise mentioned. The catalysts TpBr3Ag(THF) and Tp(CF3)2Ag(THF) were prepared in analogy to the literature known procedures developed by the group of Pérez.1,2

1. **Optimization of Reaction Conditions**

**Table S1.** Optimization of N–H insertion of NH3·H2O with diazo compound.

| Entry | Cat. | Solvent | T (°C) | **2** Yield*a* | **3** Yield*b* |
| --- | --- | --- | --- | --- | --- |
| **1** | Fe(TPP)Cl (10 mol %) | CHCl3 | 60 | *N.D.* | *N.D.* |
| **2** | Rh2(OAc)4 (5 mol %) | CHCl3 | 60 | *N.D.* | *N.D.* |
| **3** | Cu(OAc)2 (10 mol %) | CHCl3 | 60 | *N.D.* | *N.D.* |
| **4** | Pd(OAc)2 (10 mol %) | CHCl3 | 60 | trace | *N.D.* |
| **5** | AgOAc (10 mol %) | CHCl3 | 60 | *N.D.* | *N.D.* |
| **7** | Tp(CF3)2Ag (10 mol %) | CHCl3 | 60 | 40% | *N.D.* |
| **8** | TpBr3Ag (10 mol %) | CHCl3 | 60 | 75% | <5% |
| **9** | TpBr3Ag (10 mol %) | DCE | 60 | **92**% | <5% |
| **10** | TpBr3Ag (10 mol %) | DCM | 60 | 57% | <5% |
| **11** | TpBr3Ag (10 mol %) | THF | 60 | *N.D.* | *N.D.* |
| **12** | TpBr3Ag (10 mol %) | 1,4-dioxane | 60 | *N.D.* | *N.D.* |
| **13** | TpBr3Ag (10 mol %) | Toluene | 60 | 23% | *N.D.* |
| **14** | TpBr3Ag (10 mol %) | DCE | 40 | trace | *N.D.* |
| **15** | TpBr3Ag (10 mol %) | DCE | 80 | 75% | *N.D.* |

Reaction conditions: methyl phenyldiazoacetate **1** (0.3 mmol), NH3**·**H2O (2.4 mmol, 8.0 equiv) and Cat. (xx mol %) in solvent (4.0 mL) was stirred at 60 °C under nitrogen atmosphere for 12 h. *a*Isolated yield. *b*Yield was determined by 1H NMR with dibromomethane as the internal standard. *N.D.,* not detected.

**Table S2.** Optimization of N–H insertion of NH3·H2O with *N*-sulfonylhydrazone.

| Entry | **1** | Cat. | **Base** | **Solvent** | T (°C) | **33 Yield***a* | **33'' Yield***b* |
| --- | --- | --- | --- | --- | --- | --- | --- |
| 1 | **S33'** | TpBr3Ag (10 mol %) | NaOCH3 | DCE | 80 | *N.D.* | *N.D.* |
| 2 | **S33'** | TpBr3Ag (10 mol %) | Cs2CO3 | DCE | 80 | 85% | 8% |
| 3 | **S33'** | TpBr3Ag (10 mol %) | K2CO3 | DCE | 80 | 62 | 7% |
| 4 | **S33'** | TpBr3Ag (10 mol %) | NaOH | DCE | 80 | 26 | 5% |
| 5 | **S33'** | TpBr3Ag (10 mol %) | DIPEA | DCE | 80 | *N.D.* | *N.D.* |
| 6 | **S33'** | TpBr3Ag (10 mol %) | Cs2CO3 | DCE | 100 | 80 | 8% |
| 7 | **S33'** | TpBr3Ag (10 mol %) | Cs2CO3 | DCE | 60 | 60 | 6% |
| 8 | **S33'** | TpBr3Ag (10 mol %) | Cs2CO3 | DCM | 80 | 58 | 6% |
| 9 | **S33'** | TpBr3Ag (10 mol %) | Cs2CO3 | CHCl3 | 80 | 63 | 3% |
| 10 | **S33'** | TpBr3Ag (10 mol %) | Cs2CO3 | Toluene | 80 | trace | trace |
| 11 | **S33''** | TpBr3Ag (10 mol %) | Cs2CO3 | DCE | 80 | 33 | 18% |

Reaction conditions: *N*-sulfonylhydrazone **S33'** or **S33''** (0.3 mmol), NH3**·**H2O (2.4 mmol, 8.0 equiv), base (0.45 mmol, 1.5 equiv) and TpBr3Ag(thf) (10 mol %) in solvent (3.0 mL) was stirred at 80 °C for 24 h under nitrogen atmosphere. *a*Isolated yield. *b*Yield was determined by 1H NMR with dibromomethane as the internal standard. *N.D.,* not detected.

1. **Typical Procedure for N–H Insertion of NH3·H2O and Analytical Data**

**Silver-catalyzed N–H insertion of NH3·H2O with diazo compounds**

**General Procedure A:** The TpBr3Ag (33.0 mg, 0.03 mmol, 10 mol %) was introduced into a Schlenk Sealing pipe. After sealed the tube was evacuated and backfilled with N2 for three times. A mixture of NH3·H2O (308 μL, 28%-30% wt%, 0.6 mmol, 8.0 equiv) and DCE (2 mL) was injected into the Sealing pipe by syringe, followed by DCE (2 mL) solution of diazo compound (0.3 mmol, 1.0 equiv). The resulting mixture was stirred at 60 °C for 12 h in the dark. When the reaction was completed, the crude reaction mixture was allowed to reach room temperature and concentrated in vacuo and purified by column chromatography on silica gel (petroleum ether/EtOAc) to afford the corresponding N–H insertion product.

**General Procedure B:** The TpBr3Ag (33.0 mg, 0.03 mmol, 10 mol %) was introduced into a Schlenk Sealing pipe. After sealed the tube was evacuated and backfilled with N2 for three times. A mixture of NH3·H2O (308 μL, 28%-30% wt%, 0.6 mmol, 8.0 equiv) and DCE (2 mL) was injected into the Sealing pipe by syringe, followed by DCE (2 mL) solution of diazo compound (0.3 mmol, 1.0 equiv). The resulting mixture was stirred at 60 °C for 12 h in the dark. When the reaction was completed, the crude reaction mixture was allowed to reach room temperature and concentrated in vacuo. The residue was treated with Et2O solution of HCl and stirred for 1 h at room temperature to to precipitate a white solid, which was filtered, washed with cold ether and dried under vacuo to yield hydrochloride of N–H insertion product.

**Silver-catalyzed N–H insertion of NH3·H2O with *N*-triftosylhydrazones**

**General Procedure C**: The TpBr3Ag (33.0 mg, 0.03 mmol, 10 mol %) and Cs2CO3 (146.6 mg, 0.45 mmol, 1.5 equiv) were introduced into a Schlenk Sealing pipe. After sealed the tube was evacuated and backfilled with N2 for three times. A mixture of NH3·H2O (308 μL, 28%-30% wt%, 0.6 mmol, 8.0 equiv) and DCE (2 mL) was injected into the Sealing pipe by syringe, followed by DCE (2 mL) solution of *N*-triftosylhydrazone (0.3 mmol, 1.0 equiv). The resulting mixture was stirred at 80 °C for 24 h in the dark. When the reaction was completed, the crude reaction mixture was allowed to reach room temperature and concentrated in vacuo and purified by column chromatography on silica gel (petroleum ether/EtOAc) to afford the corresponding N–H insertion product.

**General Procedure D**: The TpBr3Ag (33.0 mg, 0.03 mmol, 10 mol %) and Cs2CO3 (146.6 mg, 0.45 mmol, 1.5 equiv) were introduced into a Schlenk Sealing pipe. After sealed the tube was evacuated and backfilled with N2 for three times. A mixture of NH3·H2O (308 μL, 28%-30% wt%, 0.6 mmol, 8.0 equiv) and DCE (2.0 mL) was injected into the Sealing pipe by syringe, followed by DCE (2.0 mL) solution of *N*-triftosylhydrazone (0.3 mmol, 1.0 equiv). The resulting mixture was stirred at 80 °C for 24 h in the dark. When the reaction was completed, the crude reaction mixture was allowed to reach room temperature and concentrated in vacuo. The residue was treated with Et2O solution of HCl and stirred for 1 h at room temperature to precipitate a white solid, which was filtered, washed with cold ether and dried under vacuo to yield hydrochloride of N–H insertion product.

**(2)** **methyl 2-amino-2-phenylacetate hydrochloride**

Prepared according to **General Procedure B** using methyl 2-diazo-2-phenylacetate 1 (0.3 mmol, 25.9 mg) and NH3·H2O (308 μL, 2.4 mmol) afforded compound **2** (55.7 mg, 92% yield) as a white solid (mp: 168-170 oC). **1H NMR** (500 MHz, DMSO) δ 8.97 (s, 3H), 7.51-7.46 (m, 5H), 5.29 (d, *J* = 1.5 Hz, 1H), 3.72 (s, 3H). **13C NMR** (126 MHz, DMSO) δ 169.4, 133.2, 130.0, 129.5, 128.7, 55.8, 53.7. **HRMS** (ESI) m/z calcd for C9H12NO2 [M+H]+ 166.0863, Found: 166.0862.

-----------------------------------------------------------------------------------------------------------------------------------------------------------------------------------------------

**(4)** **methyl 2-amino-2-(4-(tert-butyl)phenyl)acetate**

Prepared according to **General Procedure A** using methyl 2-(4-(*tert*-butyl) phenyl)-2-diazoacetate S4 (0.3 mmol, 69.7 mg) and NH3·H2O (308 μL, 2.4 mmol) afforded compound **4** (65.1 mg, 98% yield) as a colourless oil. **1H NMR** (600 MHz, CDCl3) δ 7.39-7.35 (m, 2H), 7.31-7.28 (m, 2H), 4.60 (s, 1H), 3.70 (s, 3H), 2.02 (s, 2H), 1.31 (s, 9H). **13C NMR** (126 MHz, CDCl3) δ 174.6, 151.0, 137.3, 126.5, 125.8, 58.5, 52.4, 34.6, 31.3. **HRMS** (ESI) m/z calcd for C13H19NNaO2 [M+Na]+ 244.1308. Found: 244.1314.

-----------------------------------------------------------------------------------------------------------------------------------------------------------------------------------------------

**(5)** **methyl 2-amino-2-(4-methoxyphenyl)acetate**

Prepared according to **General procedure A** using methyl 2-diazo-2-(4-methoxyphenyl) acetate S5 (0.3 mmol, 61.9 mg) and NH3·H2O (308 μL, 2.4 mmol) afforded compound **5** (45.1 mg, 77% yield) as a colourless oil. **1H NMR** (500 MHz, CDCl3) δ 7.28 (d, *J* = 8.7 Hz, 2H), 6.87 (d, *J* = 8.7 Hz, 2H), 4.60 (s, 1H), 3.78 (s, 3H), 3.69 (s, 3H), 2.29 (s, 2H). **13C NMR** (151 MHz, CDCl3) δ 174.5, 159.5, 132.0, 128.0, 114.2, 58.1, 55.3, 52.5. **HRMS** (ESI) m/z calcd for C10H13NNaO3 [M+Na]+ 218.0788, Found: 218.0793.

Spectroscopic data are in agreement with those reported in the literature.3

-----------------------------------------------------------------------------------------------------------------------------------------------------------------------------------------------

**(6)** **methyl 2-amino-2-(4-bromophenyl)acetate**

Prepared according to **General procedure A** using methyl 2-(4-bromophenyl)-2-diazoacetate S6 (0.3 mmol, 76.5 mg) and NH3·H2O (308 μL, 2.4 mmol) afforded compound **6** (53.5 mg, 73% yield) as a colourless oil. **1H NMR** (500 MHz, CDCl3) δ 7.47 (d, *J* = 8.5 Hz, 2H), 7.26 (d, *J* = 8.5 Hz, 2H), 4.58 (s, 1H), 3.69 (s, 3H), 1.86 (s, 2H). **13C NMR** (126 MHz, CDCl3) δ 174.0, 139.2, 131.9, 128.6, 122.1, 58.1, 52.6. **HRMS** (ESI) m/z calcd for C9H10BrNNaO2 [M+Na]+ 265.9787, Found: 265.9777.

-----------------------------------------------------------------------------------------------------------------------------------------------------------------------------------------------

**(7)** **methyl 2-amino-2-(2-chlorophenyl)acetate**

Prepared according to **General procedure A** using methyl 2-(2-chlorophenyl)-2-diazoacetate **S7** (0.3 mmol, 63.2 mg) and NH3·H2O (308 μL, 2.4 mmol) afforded compound **7** (45.5 mg, 76% yield) as a colourless oil. **1H NMR** (500 MHz, CDCl3) δ 7.37 (dd, *J* = 7.5, 1.5 Hz, 1H), 7.33 (dd, *J* = 7.0, 2.0 Hz, 1H), 7.29-7.21 (m, 2H), 4.99 (s, 1H), 3.71 (s, 3H), 2.07 (s, 2H). **13C NMR** (151 MHz, CDCl3) δ 173.9, 138.2, 133.4, 130.0, 129.2, 128.5, 127.4, 56.1, 52.6. **HRMS** (ESI) m/z calcd for C9H10ClNNaO2 [M+Na]+ 222.0292, Found: 222.0295.

-----------------------------------------------------------------------------------------------------------------------------------------------------------------------------------------------

**(8)** **ethyl 2-amino-2-phenylacetate**

Prepared according to **General procedure A** using ethyl 2-diazo-2-phenylacetate **S8** (0.3 mmol, 57.1 mg) and NH3·H2O (308 μL, 2.4 mmol) afforded compound **8** (44.6 mg, 83% yield) as a colourless oil.

Prepared according to **General procedure C** using ethyl 2-phenyl-2-(2-((2-(trifluoromethyl) phenyl) sulfonyl) hydrazineylidene) acetate **S8'** (0.3 mmol, 120.1 mg) and NH3·H2O (308 μL, 2.4 mmol) afforded compound **8** (40.3 mg, 75% yield) as a colourless oil. **1H NMR** (500 MHz, CDCl3) δ 7.39-7.31 (m, 4H), 7.28 (t, *J* = 7.0 Hz, 1H), 4.58 (s, 1H), 4.22-4.07 (m, 2H), 2.18 (s, 2H), 1.19 (t, *J* = 7.5 Hz, 3H). **13C NMR** (151 MHz, CDCl3) δ 173.9, 140.3, 128.7, 127.9, 126.7, 61.2, 58.7, 14.0. **HRMS** (ESI) m/z calcd for C10H13NNaO2 [M+Na]+ 202.0838, Found: 202.0835.

Spectroscopic data are in agreement with those reported in the literature .4

-----------------------------------------------------------------------------------------------------------------------------------------------------------------------------------------------

**(9) ethyl 2-amino-2-(3-(trifluoromethyl) phenyl)acetate hydrochloride**

Prepared according to **General procedure B** using ethyl 2-diazo-2-(3-(trifluoromethyl) phenyl) acetate **S9** (0.3 mmol, 77.5 mg) and NH3·H2O (308 μL, 2.4 mmol) afforded compound **9** (63.0 mg, 74% yield) as a white solid (mp: 171-172 oC). **1H NMR** (500 MHz, DMSO) δ 9.37 (s, 3H), 7.99 (s, 1H), 7.87 (d, *J* = 8.0 Hz, 1H), 7.81 (d, *J* = 7.5 Hz, 1H), 7.71 (t, *J* = 8.0 Hz, 1H), 5.45 (s, 1H), 4.25-4.13 (m, 2H), 1.12 (t, *J* = 7.0 Hz, 3H). **13C NMR** (151 MHz, DMSO) δ 168.7, 134.9, 133.5, 131.0, 130.4 (q, *J* = 32.0 Hz), 127.1, (q, *J* = 3.0 Hz), 126.2 (q, *J* = 12.7 Hz), 124.8 (q, *J* = 272.7 Hz), 63.2, 55.7, 14.7. **19F NMR** (564 MHz, DMSO) δ -62.67. **IR** (Film): 3446, 2712, 2248, 2124, 1734, 1025, 819, 757, 727 cm-1.

-----------------------------------------------------------------------------------------------------------------------------------------------------------------------------------------------

**(10) ethyl 2-amino-2-(o-tolyl)acetate**

Prepared according to **General procedure A** using ethyl 2-diazo-2-(o-tolyl) acetate **S10** (0.3 mmol, 61.3 mg) and NH3·H2O (308 μL, 2.4 mmol) afforded compound **10** (35.4 mg, 61% yield) as a colourless oil. **1H NMR** (500 MHz, CDCl3) δ 7.26-7.23 (m, 1H), 7.21-7.17 (m, 3H), 4.82 (s, 1H), 4.24-4.09 (m, 2H), 2.44 (s, 3H), 2.10 (s, 2H), 1.20 (t, *J* = 7.0 Hz, 3H). **13C NMR** (126 MHz, CDCl3) δ 174.4, 138.7, 136.0, 130.8, 127.8, 126.5, 125.9, 61.3, 55.2, 19.3, 14.1. **IR** (Film): 3395, 2985, 2689, 1731, 903, 724 cm-1.

Spectroscopic data are in agreement with those reported in the literature.5

-----------------------------------------------------------------------------------------------------------------------------------------------------------------------------------------------

**(11)** **ethyl 2-amino-2-(4-iodophenyl)acetate**

Prepared according to **General procedure A** using ethyl 2-diazo-2-(4-iodophenyl) acetate **S11** (0.3 mmol, 94.8 mg) and NH3·H2O (308 μL, 2.4 mmol) afforded compound **11** (69.6 mg, 76% yield) as a colourless oil. **1H NMR** (500 MHz, CDCl3) δ 7.67 (d, *J* = 8.0 Hz, 2H), 7.14 (d, *J* = 8.0 Hz, 2H), 4.55 (s, 1H), 4.24-4.08 (m, 2H), 2.05 (s, 2H), 1.20 (t, *J* = 7.0 Hz, 3H). **13C NMR** (126 MHz, CDCl3) δ 173.4, 139.9, 137.8, 128.8, 93.5, 61.5, 58.2, 14.0. **HRMS** (ESI) m/z calcd for C10H13INO2 [M+H]+ 305.9986, Found: 305.9981.

-----------------------------------------------------------------------------------------------------------------------------------------------------------------------------------------------

**(12) ethyl 2-amino-2-(4-(trifluoromethoxy)phenyl)acetate hydrochloride**

Prepared according to **General procedure B** using ethyl 2-diazo-2-(4-(trifluoromethoxy) phenyl) acetate **S12** (0.3 mmol, 82.3 mg) and NH3·H2O (308 μL, 2.4 mmol) afforded compound **12** (70.1 mg, 78% yield) as a white solid (mp: 169-171 oC). **1H NMR** (600 MHz, DMSO) δ 9.26 (s, 3H), 7.68 (d, *J* = 8.4 Hz, 2H), 7.47 (d, *J* = 8.4 Hz, 2H), 5.34 (s, 1H), 4.24-4.13 (m, 2H), 1.14 (t, *J* = 7.2 Hz, 3H). **13C NMR** (151 MHz, DMSO) δ 168.9, 149.9, 133.0, 131.6, 122.4, 120.9 (q, *J* = 257.0 Hz), 63.2, 55.5, 14.8. **19F NMR** (564 MHz, DMSO) δ -56.8. **HRMS** (ESI) m/z calcd for C11H13F3NO3 [M+H]+ 264.0842, Found: 264.0848.

-----------------------------------------------------------------------------------------------------------------------------------------------------------------------------------------------

**(13)** **ethyl 2-amino-2-(4-(4,4,5,5-tetramethyl-1,3,2-dioxaborolan-2-yl)henyl)acetate**

Prepared according to **General procedure A** using ethyl 2-diazo-2-(4-(4,4,5,5-tetramethyl- 1,3,2-dioxaborolan-2-yl) henyl) acetate **S13** (0.3 mmol, 94.8 mg) and NH3·H2O (308 μL, 2.4 mmol) afforded compound **13** (68.7 mg, 75% yield) as a colourless oil. **1H NMR** (500 MHz, CDCl3) δ 7.79 (d, *J* = 8.0 Hz, 2H), 7.37 (d, *J* = 8.0 Hz, 2H), 4.62 (s, 1H), 4.21-4.07 (m, 2H), 2.40 (s, 2H), 1.33 (s, 12H), 1.18 (t, *J* = 7.0 Hz, 3H). **13C NMR** (126 MHz, CDCl3) δ 173.5, 143.0, 135.2, 128.6, 126.1, 83.8, 61.4, 58.8, 24.8, 14.0. **HRMS** (ESI) m/z calcd for C16H24BNNaO4 [M+Na]+ 328.1694, Found: 328.1703.

-----------------------------------------------------------------------------------------------------------------------------------------------------------------------------------------------

**(14)** **ethyl 2-(4-acetylphenyl)-2-aminoacetate**

Prepared according to **General procedure A** using ethyl 2-(4-acetylphenyl)-2-diazoacetate S14 (0.3 mmol, 69.7 mg) and NH3·H2O (308 μL, 2.4 mmol) afforded compound **14** (43.8 mg, 66% yield) as a colourless oil. **1H NMR** (500 MHz, CDCl3) δ 7.91 (d, *J* = 8.5 Hz, 2H), 7.47 (d, *J* = 8.5 Hz, 2H), 4.69 (s, 1H), 4.22-4.08 (m, 2H), 2.57 (s, 3H), 2.35 (s, 2H), 1.18 (t, *J* = 7.0 Hz, 3H). **13C NMR** (126 MHz, CDCl3) δ 197.7, 173.3, 145.0, 136.8, 128.8, 127.2, 61.8, 58.5, 26.7, 14.1. **IR** (Film): 3378, 3053, 2985, 2672, 1264, 907, 727 cm-1.

-----------------------------------------------------------------------------------------------------------------------------------------------------------------------------------------------

**(15)** **methyl 4-(1-amino-2-ethoxy-2-oxoethyl)benzoate**

Prepared according to **General procedure A** using methyl 4-(1-diazo-2-ethoxy-2-oxoethyl) benzoate S15 (0.3 mmol, 74.5 mg) and NH3·H2O (308 μL, 2.4 mmol) afforded compound **15** (44.8 mg, 63% yield) as a colourless oil. **1H NMR** (500 MHz, CDCl3) δ 7.99 (d, *J* = 8.0 Hz, 2H), 7.44 (d, *J* = 8.5 Hz, 2H), 4.64 (s, 1H), 4.21-4.07 (m, 2H), 3.88 (s, 3H), 2.07 (s, 2H), 1.17 (t, *J* = 7.0 Hz, 3H). **13C NMR** (126 MHz, CDCl3) δ 173.3, 166.6, 145.0, 129.9, 129.7, 126.8, 61.5, 58.4, 52.1, 14.0. **HRMS** (ESI) m/z calcd for C12H15NNaO4 [M+Na]+ 260.0893, Found: 260.0894.

-----------------------------------------------------------------------------------------------------------------------------------------------------------------------------------------------

**(16)** **ethyl 2-amino-2-(4'-bromo-[1,1'-biphenyl]-4-yl)acetate hydrochloride**

Prepared according to **General procedure B** using ethyl 2-(4'-bromo-[1,1'-biphenyl]-4-yl)-2-di- azoacetate S16 (0.3 mmol, 103.6 mg) and NH3·H2O (308 μL, 2.4 mmol) afforded compound **16** (99.0 mg, 89% yield) as a white solid (mp: 182-184 oC). **1H NMR** (500 MHz, DMSO) δ 9.22 (s, 3H), 7.77 (d, *J* = 8.0 Hz, 2H), 7.66 (s, 4H), 7.62 (d, *J* = 8.5 Hz, 2H), 5.29 (s, 1H), 4.26-4.13 (m, 2H), 1.15 (t, *J* = 7.0 Hz, 3H). **13C NMR** (126 MHz, DMSO) δ 169.2, 140.8, 139.2, 133.0, 132.8, 129.9, 129.8, 128.0, 122.4, 63.1, 56.0, 14.8. HRMS (ESI) m/z calcd for C16H17BrNO2 [M+H]+ 334.0437, Found: 334.0438.

-----------------------------------------------------------------------------------------------------------------------------------------------------------------------------------------------

**(17)** **ethyl 2-amino-2-(4-(*bis* 4-iodophenyl)mino)henyl)acetate hydrochloride**

Prepared according to **General procedure B** using ethyl 2-(4-(*bis-*4-iodophenyl)mino)henyl)-2-*di*- azoacetate S17 (0.3 mmol, 182.8 mg) and NH3·H2O (308 μL, 2.4 mmol) afforded compound **17** (158.0 mg, 83% yield) as a white solid, m.p. 178-180 oC. **1H NMR** (500 MHz, DMSO) δ 9.11 (s, 3H), 7.65 (d, *J* = 8.5 Hz, 4H), 7.44 (d, *J* = 8.5 Hz, 2H), 7.05 (d, *J* = 8.5 Hz, 2H), 6.81 (d, *J* = 8.5 Hz, 4H), 5.17 (s, 1H), 4.28-4.13 (m, 2H), 1.17 (t, *J* = 7.0 Hz, 3H). **13C NMR** (126 MHz, DMSO) δ 169.2, 148.1, 147.1, 139.3, 130.7, 127.9, 127.3, 124.2, 88.6, 63.0, 55.8, 14.8. **IR** (Film): 3441, 3009, 2663, 2249, 1053,1024, 1005, 819, 757 cm-1.

-----------------------------------------------------------------------------------------------------------------------------------------------------------------------------------------------

**(18)** **ethyl 2-amino-2-(benzo[*d*][1,3]dioxol-5-yl)acetate**

Prepared according to **General procedure A** using ethyl 2-(benzo[*d*][1,3]dioxol-5-yl)-2-diazoacetate S18 (0.3 mmol, 70.3 mg) and NH3·H2O (308 μL, 2.4 mmol) afforded compound **18** (85 mg, 56.9% yield) as a colourless oil. **1H NMR** (500 MHz, CDCl3) δ 6.87 (d, *J* = 1.8 Hz, 1H), 6.83 (dd, *J* = 8.0, 1.8 Hz, 1H), 6.76 (d, *J* = 8.0 Hz, 1H), 5.94 (s, 2H), 4.50 (s, 1H), 4.23-4.08 (m, 2H), 1.94 (s, 2H), 1.21 (t, *J* = 7.2 Hz, 3H). **13C NMR** (151 MHz, CDCl3) δ 173.9, 147.9, 147.3, 134.3, 120.2, 108.3, 107.2, 101.1, 61.3, 58.5, 14.1. **HRMS** (ESI) m/z calcd for C11H14NO4 [M+H]+ 224.0917, Found: 224.0914.

-----------------------------------------------------------------------------------------------------------------------------------------------------------------------------------------------

**(19)** **ehyl 2-amino-2-(3,4-dichlorophenyl)acetate**

Prepared according to **General procedure A** using ethyl 2-diazo-2-(3,4-dichlorophenyl) acetate S19 (0.3 mmol, 77.7 mg) and NH3·H2O (308 μL, 2.4 mmol) afforded compound **19** (45.4 mg, 61% yield) as a colourless oil. **1H NMR** (500 MHz, CDCl3) δ 7.53 (d, *J* = 2.0 Hz, 1H), 7.42 (d, *J* = 8.5 Hz, 1H), 7.25 (dd, *J* = 8.5, 2.0 Hz, 1H), 4.57 (s, 1H), 4.25-4.11 (m, 2H), 1.89 (s, 2H), 1.23 (t, *J* = 7.0 Hz, 3H). **13C NMR** (126 MHz, CDCl3) δ 173.0, 140.3, 132.8, 132.1, 130.6, 129.0, 126.2, 61.7, 57.7, 14.1. **HRMS** (ESI) m/z calcd for C10H11Cl2NNaO2 [M+Na]+ 270.0059, Found: 270.0064.

-----------------------------------------------------------------------------------------------------------------------------------------------------------------------------------------------

**(20)** **ethyl 2-amino-2-(4-methyl-3-nitrophenyl)acetate**

Prepared according to **General procedure A** using ethyl 2-diazo-2-(4-methyl-3-nitrophenyl) acetate S20 (0.3 mmol, 75.1 mg) and NH3·H2O (308 μL, 2.4 mmol) afforded compound **20** (50.7 mg, 71% yield) as a colourless oil. **1H NMR** (500 MHz, CDCl3) δ 8.03 (d, *J* = 1.5 Hz, 1H), 7.55 (dd, *J* = 8.0, 1.5 Hz, 1H), 7.31 (d, *J* = 8.0 Hz, 1H), 4.65 (s, 1H), 4.23-4.09 (m, 2H), 2.56 (s, 3H), 2.06 (s, 2H), 1.21 (t, *J* = 7.5 Hz, 3H). **13C NMR** (126 MHz, CDCl3) δ 172.9, 149.1, 139.5, 133.1, 133.0, 131.3, 123.1, 61.7, 57.6, 20.1, 14.0. **HRMS** (ESI) m/z calcd for C11H14N2NaO4 [M+Na]+ 261.0846, Found: 261.0849.

-----------------------------------------------------------------------------------------------------------------------------------------------------------------------------------------------

**(21)** **ethyl 2-amino-2-(4-bromo-2-chlorophenyl)acetate**

Prepared according to **General procedure A** using ethyl 2-(4-bromo-2-chlorophenyl)-2-diazoacetate S21 (0.3 mmol, 91.1 mg) and NH3·H2O (308 μL, 2.4 mmol) afforded compound **21** (65.8 mg, 75% yield) as a colourless oil. **1H NMR** (500 MHz, CDCl3) δ 7.57 (d, *J* = 2.0 Hz, 1H), 7.41 (dd, *J* = 8.5, 2.0 Hz, 1H), 7.27 (d, *J* = 8.5 Hz, 1H), 4.97 (s, 1H), 4.26-4.14 (m, 2H), 2.08 (s, 2H), 1.22 (t, *J* = 7.2 Hz, 3H). **13C NMR** (151 MHz, CDCl3) δ 172.7, 137.1, 134.4, 132.5, 130.6, 129.8, 122.2, 61.8, 55.9, 14.0. **HRMS** (ESI) m/z calcd for C10H11BrClNNaO2 [M+Na]+ 313.9554, Found: 313.9546.

-----------------------------------------------------------------------------------------------------------------------------------------------------------------------------------------------

**(22)** **ethyl 2-amino-2-(9*H*-fluoren-2-yl)acetate hydrochloride**

Prepared according to **General procedure B** using ethyl 2-diazo-2-(9H-fluoren-2-yl) acetate S22 (0.3 mmol, 72.1 mg) and NH3·H2O (308 μL, 2.4 mmol) afforded compound **22** (79.3 mg, 87% yield) as a colourless oil. **1H NMR** (500 MHz, DMSO) δ 9.19 (s, 3H), 7.96 (dd, *J* = 24.0, 8.0 Hz, 2H), 7.74 (s, 1H), 7.57 (dd, *J* = 34.0, 7.5 Hz, 2H), 7.42-7.34 (m, 2H), 5.29 (s, 1H), 4.27-4.12 (m, 2H), 3.96 (s, 2H), 1.14 (t, *J* = 7.0 Hz, 3H). **13C NMR** (126 MHz, DMSO) δ 169.4, 144.4, 144.3, 143.2, 141.1, 131.9, 128.3, 128.0, 127.8, 126.2, 126.0, 121.4, 121.3, 63.0, 56.5, 37.4, 14.8. **HRMS** (ESI) m/z calcd for C17H18NO2 [M+H]+ 268.1332, Found: 268.1327.

-----------------------------------------------------------------------------------------------------------------------------------------------------------------------------------------------

**(23)** **ethyl 2-amino-2-(naphthalen-2-yl)acetate**

Prepared according to **General procedure A** using ethyl 2-diazo-2-(naphthalen-2-yl) acetate S23 (0.3 mmol, 72.1 mg) and NH3·H2O (308 μL, 2.4 mmol) afforded compound **23** (59.8 mg, 87% yield) as a colourless oil. **1H NMR** (500 MHz, CDCl3) δ 7.86-7.81 (m, 4H), 7.52-7.45 (m, 3H), 4.77 (s, 1H), 4.26-4.09 (m, 2H), 2.15 (s, 2H), 1.20 (t, *J* = 7.0 Hz, 3H). **13C NMR** (126 MHz, CDCl3) δ 173.8, 137.7, 133.3, 132.9, 128.5, 127.9, 127.6, 126.2, 126.1, 125.7, 124.6, 61.3, 58.9, 14.0. **HRMS** (ESI) m/z calcd for C14H15NNaO2 [M+Na]+ 252.0995, Found: 252.1003.

Spectroscopic data are in agreement with those reported in the literature.5

-----------------------------------------------------------------------------------------------------------------------------------------------------------------------------------------------

**(24)** **ethyl 2-amino-2-(phenanthren-9-yl)acetate**

Prepared according to **General procedure A** using ethyl 2-diazo-2-(phenanthren-9-yl) acetate S24 (0.3 mmol, 87.1 mg) and NH3·H2O (308 μL, 2.4 mmol) afforded compound **24** (69.6 mg, 83% yield) as a colourless oil. **1H NMR** (500 MHz, CDCl3) δ 8.76 (d, *J* = 7.5 Hz, 1H), 8.67 (d, *J* = 8.0 Hz, 1H), 8.21 (d, *J* = 8.0 Hz, 1H), 7.87 (d, *J* = 8.0 Hz, 1H), 7.74 (s, 1H), 7.71-7.64 (m, 3H), 7.61 (t, *J* = 7.0 Hz, 1H), 5.36 (s, 1H), 4.30-4.16 (m, 2H), 2.44 (s, 2H), 1.17 (t, *J* = 7.5 Hz, 3H). **13C NMR** (151 MHz, CDCl3) δ 174.7, 134.4, 131.2, 131.0, 130.3, 129.7, 128.7, 127.1, 126.9, 126.8, 126.6, 126.1, 124.0, 123.4, 122.5, 61.7, 56.4, 14.0. **HRMS** (ESI) m/z calcd for C18H17NNaO2 [M+Na]+ 302.1151, Found: 302.1156.

-----------------------------------------------------------------------------------------------------------------------------------------------------------------------------------------------

**(25)** **ethyl 2-amino-2-(thiophen-2-yl)acetate**

Prepared according to **General procedure A** using ethyl 2-diazo-2-(thiophen-2-yl) acetate S25 (0.3 mmol, 58.9 mg) and NH3·H2O (308 μL, 2.4 mmol) afforded compound **25** (29.5 mg, 53% yield) as a colourless oil. **1H NMR** (500 MHz, CDCl3) δ 7.24 (dd, *J* = 5.0, 1.0 Hz, 1H), 7.05 (d, *J* = 3.5 Hz, 1H), 6.97 (dd, *J* = 5.0, 3.5 Hz, 1H), 4.86 (s, 1H), 4.29-4.18 (m, 2H), 2.09 (s, 2H), 1.28 (t, *J* = 7.0 Hz, 3H). **13C NMR** (126 MHz, CDCl3) δ 172.7, 143.5, 126.9, 125.1, 124.7, 61.7, 54.6, 14.1. **IR** (Film): 3714, 2845, 2528, 1734, 903, 718 cm-1.

Spectroscopic data are in agreement with those reported in the literature.6

-----------------------------------------------------------------------------------------------------------------------------------------------------------------------------------------------

**(26)** **ethyl 2-amino-2-(6-chloropyridin-3-yl)acetate**

Prepared according to **General procedure A** using ethyl 2-(6-chloropyridin-3-yl)-2-diazoacetate S26 (0.3 mmol, 67.7 mg) and NH3·H2O (308 μL, 2.4 mmol) afforded compound **26** (35.4 mg, 55% yield) as a colourless oil. **1H NMR** (500 MHz, CDCl3) δ 8.42 (s, 1H), 7.72 (d, *J* = 8.0 Hz, 1H), 7.30 (d, *J* = 8.0 Hz, 1H), 4.63 (s, 1H), 4.22-4.08 (m, 2H), 2.04 (s, 2H), 1.20 (t, *J* = 7.0 Hz, 3H). **13C NMR** (151 MHz, CDCl3) δ 172.7, 150.9, 148.6, 137.2, 134.7, 124.2, 61.8, 55.7, 14.0. **HRMS** (ESI) m/z calcd for C9H12ClN2O2 [M+H]+ 215.0582, Found: 215.0586.

-----------------------------------------------------------------------------------------------------------------------------------------------------------------------------------------------

**(27)** **benzyl 2-amino-2-phenylacetate**

Prepared according to **General procedure A** using benzyl 2-diazo-2-phenylacetate S27 (0.3 mmol, 75.7 mg) and NH3·H2O (308 μL, 2.4 mmol) afforded compound **27** (60.8 mg, 84% yield) as a colourless oil. **1H NMR** (500 MHz, CDCl3) δ 7.37-7.32 (m, 4H), 7.32-7.27 (m, 4H), 7.21-7.18 (m, 2H), 5.13 (ABq, *J* = 12.5 Hz, 2H), 4.66 (s, 1H), 2.27 (s, 2H). **13C NMR** (126 MHz, CDCl3) δ 173.6, 139.8, 135.4, 128.7, 128.4, 128.2, 128.0, 127.9, 126.8, 66.9, 58.7.

-----------------------------------------------------------------------------------------------------------------------------------------------------------------------------------------------

**(28)** **allyl 2-amino-2-phenylacetate**

Prepared according to **General procedure A** using allyl 2-diazo-2-phenylacetate S28 (0.3 mmol, 60.7 mg) and NH3·H2O (308 μL, 2.4 mmol) afforded compound **28** (49.3 mg, 86% yield) as a colourless oil.

Prepared according to **General procedure C** using allyl (*Z*)-2-phenyl-2-(2-((2-(trifluoromethyl) phenyl) sulfonyl) hydrazineylidene) acetate S28ꞌ (0.3 mmol, 123.7 mg) and NH3·H2O (308 μL, 2.4 mmol) afforded compound **28** (49.3 mg, 86% yield) as a colourless oil.

**1H NMR** (500 MHz, CDCl3) δ 7.41-7.33 (m, 4H), 7.33-7.28 (m, 1H), 5.88-5.79 (m, 1H), 5.22-5.15 (m, 2H), 4.64 (s, 1H), 4.63-4.56 (m, 2H), 1.90 (s, 2H). **13C NMR** (126 MHz, CDCl3) δ 173.6, 140.2, 131.7, 128.8, 128.0, 126.8, 118.3, 65.7, 58.8. **IR** (Film): 3202, 2944, 2627, 2253, 1442, 1375, 1039, 918 cm-1.

-----------------------------------------------------------------------------------------------------------------------------------------------------------------------------------------------

**(29)** **3-(trimethylsilyl)prop-2-yn-1-yl 2-amino-2-phenylacetate**

Prepared according to **General procedure A** using 3-(trimethylsilyl)prop-2-yn-1-yl 2-diazo-2-phenylacetate S29 (0.3 mmol, 81.7 mg) and NH3·H2O (308 μL, 2.4 mmol) afforded compound **29** (58.0 mg, 74% yield) as a colourless oil. **1H NMR** (500 MHz, CDCl3) δ 7.41-7.28 (m, 5H), 4.81-4.60 (m, 3H), 2.03 (s, 2H), 0.15 (s, 9H). **13C NMR** (151 MHz, CDCl3) δ 173.2, 139.7, 128.8, 128.1, 126.8, 98.4, 92.4, 58.6, 53.4, -0.4. **IR** (Film): 3164, 3000, 2760, 2253, 1742, 1265, 905, 726 cm-1.

-----------------------------------------------------------------------------------------------------------------------------------------------------------------------------------------------

**(30)** **2-(trimethylsilyl)ethyl 2-amino-2-phenylacetate**

Prepared according to **General procedure A** using 2-(trimethylsilyl)ethyl 2-diazo-2-phenylacetate S30 (0.3 mmol, 78.7 mg) and NH3·H2O (308 μL, 2.4 mmol) afforded compound **30** (65.6 mg, 87% yield) as a colourless oil. **1H NMR** (500 MHz, CDCl3) δ 7.39-7.33 (m, 4H), 7.33-7.28 (m, 1H), 4.56 (s, 1H), 4.27-4.11 (m, 2H), 1.90 (s, 2H), 0.96-0.90 (m, 2H), 0.02 (s, 9H). **13C NMR** (126 MHz, CDCl3) δ 174.1, 140.5, 128.7, 127.9, 126.8, 63.7, 58.9, 17.2, -1.6. **HRMS** (ESI) m/z calcd for C13H21NNaO2Si [M+H]+ 274.1234, Found: 274.1235.

-----------------------------------------------------------------------------------------------------------------------------------------------------------------------------------------------

**(31)** ***tert*-butyl 2-amino-2-phenylacetate hydrochloride**

Prepared according to **General procedure B** using tert-butyl 2-diazo-2-phenylacetate S31 (0.3 mmol, 65.5 mg) and NH3·H2O (308 μL, 2.4 mmol) afforded compound **31** (65.1 mg, 89% yield) as a white solid, m.p. 166-168 oC. **1H NMR** (500 MHz, DMSO) δ 8.81 (s, 3H), 7.46-7.40 (m, 5H), 5.06 (s, 1H), 1.33 (s, 9H). **13C NMR** (126 MHz, DMSO) δ 168.3, 134.0, 130.3, 129.8, 129.0, 84.1, 56.8, 28.3. **HRMS** (ESI) m/z calcd for C12H18NO2 [M+H]+ 208.1332, Found: 208.1338.

-----------------------------------------------------------------------------------------------------------------------------------------------------------------------------------------------

**(32)** **tyclohexyl 2-amino-2-phenylacetate**

Prepared according to **General procedure A** using cyclohexyl 2-diazo-2-phenylacetate S32 (0.3 mmol, 73.3 mg) and NH3·H2O (308 μL, 2.4 mmol) afforded compound **32** (62.3 mg, 89% yield) as a colourless oil. Prepared according to **General procedure C** using cyclohexyl (*Z*)-2-phenyl-2-(2-((2-(trifluoromethyl) phenyl) sulfonyl) hydrazineylidene) acetate S19 (0.3 mmol, 136.3 mg) and NH3·H2O (308 μL, 2.4 mmol) afforded **32** (56.7 mg, 81% yield) as a colourless oil.

**1H NMR** (600 MHz, CDCl3) δ 7.40-7.32 (m, 4H), 7.31-7.26 (m, 1H), 4.83-4.75 (m, 1H), 4.58 (s, 1H), 1.88 (s, 2H), 1.85-1.78 (m, 1H), 1.72-1.63 (m, 2H), 1.57-1.40 (m, 3H), 1.39-1.17 (m, 4H). **13C NMR** (126 MHz, CDCl3) δ 173.4, 140.7, 128.6, 127.8, 126.7, 73.5, 58.9, 31.4, 31.1, 25.2, 23.5, 23.3. **HRMS** (ESI) m/z calcd for C14H19NNaO2 [M+Na]+ 256.1308, Found: 256.1308.

-----------------------------------------------------------------------------------------------------------------------------------------------------------------------------------------------

**(33)** **diphenylmethanamine hydrochloride**

Prepared according to **General procedure B** using (diazomethylene) dibenzene **S33** (0.3 mmol, 58.2 mg) and NH3·H2O (308 μL, 2.4 mmol) afforded compound **33** (45.0 mg, 82% yield) as a white solid, m.p. 181-183 oC. Prepared according to **General procedure D** using *N*'-(diphenylmethylene)-2-(trifluoromethyl) benzenesulfonohydrazide **S33ꞌ** (0.3 mmol, 121.3 mg) and NH3·H2O (308 μL, 2.4 mmol) afforded compound **33 (**46.7 mg, 85% yield) as a white solid.

**1H NMR** (600 MHz, DMSO) δ 9.30 (d, *J* = 38.4 Hz, 3H), 7.58-7.56 (m, 4H), 7.41-7.38 (m, 4H), 7.35-7.31 (m, 2H), 5.61 (s, 1H). **13C NMR** (151 MHz, DMSO) δ 139.0, 129.1, 128.6, 127.9, 57.6. **HRMS** (ESI) m/z calcd for C13H14N [M+H]+ 184.1121, Found: 184.1129.

-----------------------------------------------------------------------------------------------------------------------------------------------------------------------------------------------

**(34)** ***bis*(4-chlorophenyl)methanamine hydrochloride**

Prepared according to **General procedure B** using 4,4'-(diazomethylene)*bis*(chlorobenzene) S34 (0.3 mmol, 78.9 mg) and NH3·H2O (308 μL, 2.4 mmol) afforded compound **34** (77.9 mg, 90% yield) as a white solid, m.p. 165-167 oC. Prepared according to **General procedure D** using *N'*-(*bis*(4-chlorophenyl)methylene)-2-(trifluoromethyl)benzenesulfonohydrazide **S34ꞌ** (0.3 mmol, 142.0 mg) and NH3·H2O (308 μL, 2.4 mmol) afforded compound **34** (64.3 mg, 85% yield) as a white solid.

**1H NMR** (500 MHz, DMSO) δ 9.38 (s, 3H), 7.65-7.44 (m, 8H), 5.73 (s, 1H). **13C NMR** (126 MHz, DMSO) δ 137.9, 134.1, 130.3, 129.7, 56.5. **HRMS** (ESI) m/z calcd for C13H12Cl2N [M+H]+ 252.0341, Found: 252.0340.

Spectroscopic data are in agreement with those reported in the literature.7

-----------------------------------------------------------------------------------------------------------------------------------------------------------------------------------------------

**(35)** **(2-iodophenyl)(phenyl)methanamine hydrochloride**

Prepared according to **General procedure B** using 1-(diazo(phenyl)methyl)-2-iodobenzene S35 (0.3 mmol, 96.0 mg) and NH3·H2O (308 μL, 2.4 mmol) afforded compound **35** (98.5 mg, 95% yield) as a white solid, m.p. 177-179 oC. **1H NMR** (500 MHz, DMSO) δ 9.46 (s, 3H), 7.94 (ddd, *J* = 8.0, 3.5, 1.5 Hz, 2H), 7.57-7.52 (m, 1H), 7.51-7.47 (m, 2H), 7.43-7.33 (m, 3H), 7.14 (td, *J* = 8.0, 1.5 Hz, 1H), 5.61 (s, 1H). **13C NMR** (126 MHz, DMSO) δ 140.8, 140.6, 137.4, 131.3, 129.8, 129.6, 129.5, 129.3, 128.9, 101.2, 62.0. **IR** (Film): 3477, 3004, 2845, 2251, 1661, 1023, 1003, 821, 758 cm-1.

-----------------------------------------------------------------------------------------------------------------------------------------------------------------------------------------------

**(36) (3-fluorophenyl)(4-(trimethylsilyl)phenyl)methanamine hydrochloride**

Prepared according to **General procedure B** using (4-(diazo(3-fluorophenyl)methyl)phenyl) trimethylsilane S36 (0.3 mmol, 85.3 mg) and NH3·H2O (308 μL, 2.4 mmol) afforded compound **36** (75.3 mg, 81% yield) as a white solid, m.p. 155-157 oC. **1H NMR** (500 MHz, DMSO) δ 9.23 (s, 3H), 7.42-7.30 (m, 5H), 7.27-7.19 (m, 2H), 6.99-6.92 (m, 1H), 5.45 (s, 1H), 0.00 (s, 9H). **13C NMR** (151 MHz, DMSO) δ 163.0 (d, *J* = 244.0 Hz), 142.1 (d, *J* = 7.6 Hz), 141.1, 139.5, 134.5, 131.8 (d, *J* = 7.6 Hz), 127.7, 124.5 (d, *J* = 3.0 Hz), 116.0 (d, *J* = 21.0 Hz), 115.3 (d, *J* = 22.7 Hz), 57.5, -0.3. **19F NMR** (564 MHz, DMSO) δ (-112.13)–(-112.23) (m, 1F). **IR** (Film): 3434, 2249, 2124, 1024, 1004, 821, 758 cm-1.

-----------------------------------------------------------------------------------------------------------------------------------------------------------------------------------------------

**(37)** **9*H*-fluoren-9-amine hydrochloride**

Prepared according to **General procedure B** using 9-diazo-9*H*-fluorene S37(0.3 mmol, 57.7 mg) and NH3·H2O (308 μL, 2.4 mmol) afforded compound **37** (44.4 mg, 68% yield) as a white solid, m.p. 147-149 oC. **1H NMR** (500 MHz, DMSO) δ 9.35 (s, 3H), 8.09 (d, *J* = 5.0 Hz, 2H), 7.92 (d, *J* = 5.5 Hz, 2H), 7.55-7.36 (m, 4H), 5.37 (s, 1H). **13C NMR** (151 MHz, DMSO) δ 141.3, 141.1, 130.5, 128.7, 126.9, 121.4, 54.4. **IR** (Film): 3392, 2253, 1715, 903, 724 cm-1.

-----------------------------------------------------------------------------------------------------------------------------------------------------------------------------------------------

**(38)** **10,11-dihydro-5*H*-dibenzo[*a*,*d*][7]annulen-5-amine**

Prepared according to **General procedure B** using 5-diazo-10,11-dihydro-5H-dibenzo[*a*,*d*][7]annulene S38 (0.3 mmol, 66.1 mg) and NH3·H2O (308 μL, 2.4 mmol) afforded compound **38** (48.4 mg, 77% yield) as a white solid, m.p. 198-200 oC. **1H NMR** (500 MHz, DMSO) δ 9.32 (s, 3H), 7.52 (d, *J* = 7.5 Hz, 2H), 7.30-7.20 (m, 6H), 5.85 (s, 1H) 3.20 (s, 4H). **13C NMR** (151 MHz, DMSO) δ 139.5, 136.4, 131.3, 129.5, 128.1, 127.1, 55.9, 32.4. **IR** (Film): 3435, 3045, 2977, 2250, 2125, 1645, 1278, 1024, 1005, 820, 758, 727, cm-1.

-----------------------------------------------------------------------------------------------------------------------------------------------------------------------------------------------

**(39)** **(3-fluorophenyl)(naphthalen-2-yl) methanamine**

Prepared according to **General procedure B** using 2-(diazo(3-fluorophenyl)methyl)naphthalene S39 (0.3 mmol, 78.7 mg) and NH3·H2O (308 μL, 2.4 mmol) afforded compound **39** (67.1 mg, 89% yield) as a white solid, m.p. 161-163 oC. **1H NMR** (500 MHz, DMSO) δ 9.48 (s, 3H), 8.20-8.12 (m, 1H), 8.06-7.95 (m, 3H), 7.67 (t, *J* = 7.5 Hz, 1H), 7.61-7.54 (m, 2H), 7.53-7.49 (m, 1H), 7.45-7.35 (m, 2H), 7.18 (t, *J* = 7.5 Hz, 1H), 6.48 (q *J* = 4.5 Hz, 1H). **13C NMR** (126 MHz, DMSO) δ 162.4 (d, *J* = 244.0 Hz), 140.8 (d, *J* = 7.6 Hz), 133.9, 133.5, 131.2 (d, *J* = 8.4 Hz), 130.1, 129.5, 129.3, 127.4, 126.7, 125.8, 125.0 (d, *J* = 1.3 Hz), 124.6, 123.8, 115.9 (d, *J* = 21.0 Hz), 115.8 (d, *J* = 22.5 Hz), 53.3. **19F NMR** (564 MHz, DMSO) δ (-112.27)–(-112.43) (m, 1F). **HRMS** (ESI) m/z calcd for C17H15FN [M+H]+ 252.1183, Found: 252.1183.

-----------------------------------------------------------------------------------------------------------------------------------------------------------------------------------------------

**(40)** ***bis*(4-fluorophenyl)methanamine hydrochloride**

Prepared according to **General procedure D** using *N*'-((4-fluorophenyl)methylene)-2-(trifluoromethyl) benzenesulfonohydrazide S40ꞌ (0.3 mmol, 132.1 mg) and NH3·H2O (308 μL, 2.4 mmol) afforded compound **40** (74.4 mg, 97% yield) as awhite solid, m.p. 163-165 oC. **1H NMR** (500 MHz, DMSO) δ 9.39 (s, 3H), 7.64 (dd, *J* = 8.0, 5.5 Hz, 4H), 7.24 (t, *J* = 8.5 Hz, 4H), 5.70 (s, 1H). **13C NMR** (126 MHz, DMSO) δ162.8 (d, *J* = 245.7 Hz), 135.6 (d, *J* = 2.5 Hz), 130.7 (d, *J* = 8.8 Hz), 116.5 (d, *J* = 22.7 Hz), 56.7. **19F NMR** (564 MHz, DMSO) δ -113.80 (s, 2F). **HRMS** (ESI) m/z calcd for C13H12F2N [M+H]+ 220.0932, Found: 220.0939.

-----------------------------------------------------------------------------------------------------------------------------------------------------------------------------------------------

**(41)** **di-*p*-tolylmethanamine hydrochloride**

Prepared according to **General procedure D** using *N'*-(di-*p*-tolylmethylene)-2-(trifluoromethyl) benzenesulfonohydrazide S41ꞌ (0.3 mmol, 129.7 mg) and NH3·H2O (308 μL, 2.4 mmol) afforded compound **41** (44.6 mg, 60% yield) as a white solid, m.p. 171-173 oC). **1H NMR** (500 MHz, DMSO) δ 9.18 (d, *J* = 3.5 Hz, 3H), 7.41 (d, *J* = 8.0 Hz, 4H), 7.19 (d, *J* = 8.0 Hz, 4H), 5.50 (q, *J* = 5.5 Hz, 1H), 2.27 (s, 6H). **13C NMR** (126 MHz, DMSO) δ 138.4, 136.6, 130.1, 128.2, 57.60, 21.6. **HRMS** (ESI) m/z calcd for C15H18N [M+H]+ 212.1434, Found: 212.1428.

-----------------------------------------------------------------------------------------------------------------------------------------------------------------------------------------------

**(42)** **di(thiophen-3-yl)methanamine hydrochloride**

Prepared according to **General procedure D** using *N*'-(di(thiophen-3-yl)methylene)-2 -(trifluoromethyl)benzenesulfonohydrazide S42ꞌ (0.3 mmol, 124.9 mg) and NH3·H2O (308 μL, 2.4 mmol) afforded compound **42** (50.1 mg, 72% yield) as a white solid (mp: 154-156 oC). **1H NMR** (500 MHz, DMSO) δ 9.13 (s, 3H), 7.64 (s, 2H), 7.60 (dd, *J* = 4.9, 3.0 Hz, 2H), 7.66-7.63 (m, 2H), 5.78-5.73 (m, 1H). **13C NMR** (126 MHz, DMSO) δ 139.9, 128.3, 127.9, 124.9, 50.1. **IR** (Film): 3477, 3009, 2250, 1052, 1024, 1005, 820, 757 cm-1.

-----------------------------------------------------------------------------------------------------------------------------------------------------------------------------------------------

**(43)** **di(benzofuran-2-yl)methanamine**

Prepared according to **General procedure C** using *N*'-(di(benzofuran-2-yl)methylene)-2-(trifluoro- methyl) benzenesulfonohydrazide S43ꞌ (0.3 mmol, 145.3 mg) and NH3·H2O (308 μL, 2.4 mmol) afforded compound **43** (43.4 mg, 55% yield) as a colourless oil. **1H NMR** (500 MHz, CDCl3) δ 7.54 (d, *J* = 7.0 Hz, 2H), 7.45 (d, *J* = 8.5 Hz, 2H), 7.26 (td, *J* = 7.5, 1.5 Hz, 2H), 7.24-7.21 (m, 2H), 6.67 (s, 2H), 5.45 (s, 1H), 2.08 (s, 2H). **13C NMR** (126 MHz, CDCl3) δ 157.4, 154.9, 128.1, 124.2, 122.8, 121.0, 111.3, 103.3, 49.2. **IR** (Film): 3442, 3052, 2361, 2253, 1264, 904, 725 cm-1.

-----------------------------------------------------------------------------------------------------------------------------------------------------------------------------------------------

**(44)** **(2-fluorophenyl)(phenyl)methanamine hydrochloride**

Prepared according to **General procedure D** using *N*'-((2-fluorophenyl)(phenyl)methylene)-2-(triflu- oromethyl) benzenesulfonohydrazide S44ꞌ (0.3 mmol, 126.7 mg) and NH3·H2O (308 μL, 2.4 mmol) afforded compound **44** (56.1 mg, 93% yield) as a white solid (mp: 150-152 oC). **1H NMR** (500 MHz, DMSO) δ 9.41 (s, 3H), 7.60 (d, *J* = 7.5 Hz, 2H), 7.54 (d, *J* = 10.5 Hz, 1H), 7.48-7.39 (m, 4H), 7.34 (t, *J* = 7.5 Hz, 1H), 7.21-7.15 (m, 1H), 5.67 (q, *J* = 4.5 Hz, 1H). **13C NMR** (126 MHz, DMSO) δ 163.0 (d, *J* = 244.4 Hz), 142.1 (d, *J* = 7.3 Hz), 139.0, 131.8 (d, *J* = 8.4 Hz), 129.7, 129.3, 128.4, 124.6 (d, *J* = 2.2 Hz), 116.0 (d, *J* = 21.4 Hz), 115.3 (d, *J* = 23.9 Hz), 57.5. **19F NMR** (470 MHz, DMSO) δ (-112.17)-(-112.27) (m). **HRMS** (ESI) m/z calcd for C13H13FN [M+H]+ 202.1027, Found: 202.1027.

-----------------------------------------------------------------------------------------------------------------------------------------------------------------------------------------------

**(45)** **(4-fluorophenyl)(phenyl)methanamine hydrochloride**

Prepared according to **General procedure D** using *N'*-((4-fluorophenyl)(phenyl) methylene)-2-(trifluoromethyl) benzenesulfonohydrazide S45ꞌ (0.3 mmol, 126.7 mg) and NH3·H2O (308 μL, 2.4 mmol) afforded compound **45** (72.3 mg, 88% yield) as a white solid (mp: 154-156 oC). **1H NMR** (500 MHz, DMSO) δ 9.31 (s, 3H), 7.65-7.59 (m, 2H), 7.56 (d, *J* = 7.5 Hz, 2H), 7.41 (t, *J* = 7.5 Hz, 2H), 7.34 (t, *J* = 7.5 Hz, 1H), 7.29-7.23 (m, 2H), 5.66 (s, 1H). **13C NMR** (126 MHz, DMSO) δ162.8 (d, *J* = 244.4 Hz), 139.2, 135.7 (d, *J* = 2.5 Hz), 130.7 (d, *J* = 8.8 Hz), 129.7, 129.2, 128.2, 116.5 (d, *J* = 21.4 Hz), 57.3. **19F NMR** (470 MHz, DMSO) δ (-113.77)-(-113.86) (m). **HRMS** (ESI) m/z calcd for C13H13FN [M+H]+ 202.1027, Found: 202.1018.

-----------------------------------------------------------------------------------------------------------------------------------------------------------------------------------------------

**(46)** **(4-chlorophenyl)(phenyl)methanamine hydrochloride**

Prepared according to **General procedure D** using *N'*-((4-chlorophenyl)(phenyl) methylene)-2-(trifluoromethyl) benzenesulfonohydrazide S46 (0.3 mmol, 131.7 mg) and NH3·H2O (308 μL, 2.4 mmol) afforded compound **46** (74.7 mg, 98% yield) as a white solid (mp: 159-161 oC). **1H NMR** (500 MHz, DMSO) δ 9.39 (s, 3H), 7.63-7.55 (m, 4H), 7.48 (d, *J* = 8.0 Hz, 2H), 7.40 (t, *J* = 7.0 Hz, 2H), 7.36-7.31 (m, 1H), 5.66 (s, 1H). **13C NMR** (126 MHz, DMSO) δ 139.0, 138.4, 133.9, 130.4, 129.7, 129.6, 129.3, 128.3, 57.3. HRMS (ESI) m/z calcd for C13H13ClN [M+H]+ 218.0731, Found: 218.0729.

-----------------------------------------------------------------------------------------------------------------------------------------------------------------------------------------------

**(47)** **(4-(methylsulfonyl)phenyl)(phenyl)methanamine hydrochloride**

Prepared according to **General procedure D** using *N*'-((4-(methylsulfonyl)phenyl)(phenyl) methylene)-2-(trifluoromethyl) benzenesulfonohydrazide S47ꞌ (0.3 mmol, 144.7 mg) and NH3·H2O (308 μL, 2.4 mmol) afforded compound **47** (78.6 mg, 88% yield) as a white solid (mp: 171-173 oC). **1H NMR** (500 MHz, DMSO) δ 9.50 (s, 3H), 7.97 (d, *J* = 8.0 Hz, 2H), 7.87 (d, *J* = 8.0 Hz, 2H), 7.61 (d, *J* = 7.5 Hz, 2H), 7.42 (t, *J* = 7.5 Hz, 2H), 7.35 (t, *J* = 7.0 Hz, 1H), 5.78 (q, *J* = 3.0 Hz, 1H), 3.22 (s, 3H). **13C NMR** (126 MHz, DMSO) δ 144.9, 141.5, 138.6, 129.8, 129.5, 129.3, 128.4, 128.3, 57.5, 44.3. **HRMS** (ESI) m/z calcd for C14H16NO2S [M+H]+ 262.0896, Found: 262.0900.

-----------------------------------------------------------------------------------------------------------------------------------------------------------------------------------------------

**(48)** **phenyl(3-(trifluoromethoxy)phenyl)methanamine hydrochloride**

Prepared according to **General procedure D** using *N*'-(phenyl(3-(trifluoromethoxy)phenyl) methylene)-2-(trifluoromethyl) benzenesulfonohydrazide S48ꞌ (0.3 mmol, 146.5 mg) and NH3·H2O (308 μL, 2.4 mmol) afforded compound **48** (74.6 mg, 93% yield) as a white solid (mp: 137-139 oC). **1H NMR** (500 MHz, DMSO) δ 9.45 (s, 3H), 7.70-7.64 (m, 2H), 7.62 (d, *J* = 7.5 Hz, 2H), 7.55 (t, *J* = 8.0 Hz, 1H), 7.41 (t, *J* = 7.0 Hz, 2H), 7.37-7.32 (m,2H), 5.74 (s, 1H). **13C NMR** (126 MHz, DMSO) δ 149.4, 142.1, 138.9, 131.8, 129.8, 129.4, 128.4, 127.6, 121.6, 121.2, 121.0 (q, *J* = 257.0 Hz), 57.4. **19F NMR** (470 MHz, DMSO) δ -56.71. **HRMS** (ESI) m/z calcd for C14H13F3NO [M+H]+ 268.0944, Found: 268.0953.

-----------------------------------------------------------------------------------------------------------------------------------------------------------------------------------------------

**(49)** **(4-methoxyphenyl)(phenyl)methanamine hydrochloride**

Prepared according to **General procedure D** using *N*'-((4-methoxyphenyl)(phenyl) methylene)-2-(trifluoromethyl) benzenesulfonohydrazide S49ꞌ (0.3 mmol, 130.3 mg) and NH3·H2O (308 μL, 2.4 mmol) afforded compound **49** (59.9 mg, 80% yield) as a white solid (mp: 155-157 oC). **1H NMR** (500 MHz, DMSO) δ 9.21 (s, 3H), 7.55 (d, *J* = 7.5 Hz, 2H), 7.47 (d, *J* = 8.5 Hz, 2H), 7.40 (t, *J* = 7.5 Hz, 2H), 7.33 (t, *J* = 7.0 Hz, 1H), 6.96 (d, *J* = 8.5 Hz, 2H), 5.55 (s, 1H), 3.73 (s, 3H). **13C NMR** (151 MHz, DMSO) δ 160.0, 139.7, 131.3, 129.8, 129.6, 129.0, 128.2, 115.0, 57.5, 56.2. **IR** (Film): 3477, 3251, 2248, 1052, 1024, 1005, 820, 757 cm-1.

-----------------------------------------------------------------------------------------------------------------------------------------------------------------------------------------------

**(50)** **(4-(methylthio)phenyl)(phenyl)methanamine**

Prepared according to **General procedure C** using *N*'-((4-(methylthio)phenyl)(phenyl)methylene)-2- (trifluoromethyl) benzenesulfonohydrazide S50ꞌ (0.3 mmol, 135.1 mg) and NH3·H2O (308 μL, 2.4 mmol) afforded compound **50** (46.8 mg, 68% yield) as a colourless oil. **1H NMR** (500 MHz, CDCl3) δ 7.36 (d, *J* = 7.5 Hz, 2H), 7.34-7.28 (m, 4H), 7.25-7.19 (m, 3H), 5.18 (s, 1H), 2.46 (s, 3H), 1.92 (s, 2H). **13C NMR** (151 MHz, CDCl3) δ 145.3, 142.5, 136.9, 128.5, 127.4, 127.0, 126.82, 126.80, 59.3, 16.0. **IR** (Film): 3517, 3002, 2943, 2252, 1375, 1038, 917, 749 cm-1.

-----------------------------------------------------------------------------------------------------------------------------------------------------------------------------------------------

**(51)** **phenyl(4-vinylphenyl)methanamine hydrochloride**

Prepared according to **General procedure D** using *N'*-(phenyl(4-vinylphenyl) methylene)-2-(trifluoromethyl) benzenesulfonohydrazide S51ꞌ (0.3 mmol, 129.1 mg) and NH3·H2O (308 μL, 2.4 mmol) afforded compound **51** (60.5 mg, 82% yield) as a white solid (mp: 144-146 oC). **1H NMR** (500 MHz, DMSO) δ 9.37 (s, 3H), 7.61-7.55 (m, 4H), 7.50 (d, *J* = 8.0 Hz, 2H), 7.39 (t, *J* = 7.5 Hz, 2H), 7.33 (t, *J* = 7.5 Hz, 1H), 6.72 (dd, *J* = 17.5, 11.0 Hz, 1H), 5.85 (d, *J* = 17.5 Hz, 1H), 5.61 (q, *J* = 5.0 Hz, 1H), 5.27 (d, *J* = 11.0 Hz, 1H). **13C NMR** (126 MHz, DMSO) δ 139.4, 138.9, 137.9, 136.9, 129.7, 129.2, 128.7, 128.4, 127.3, 116.1, 57.8. **HRMS** (ESI) m/z calcd for C15H16N [M+H]+ 210.1277, Found: 210.1273.

-----------------------------------------------------------------------------------------------------------------------------------------------------------------------------------------------

**(52)** **(3,5-bis(trifluoromethyl)phenyl)(phenyl)methanamine hydrochloride**

Prepared according to **General procedure D** using *N'*-((3,5-*bis*(trifluoromethyl)phenyl)(phenyl) methylene)-2-(trifluoromethyl) benzenesulfonohydrazide S52ꞌ (0.3 mmol, 162.1 mg ) and NH3·H2O (308 μL, 2.4 mmol) afforded compound **52** (102.4 mg, 96% yield) as a white solid (mp: 159-161 oC). **1H NMR** (500 MHz, DMSO) δ 9.53 (s, 3H), 8.39 (s, 2H), 8.15 (s, 1H), 7.64-7.60 (m, 2H), 7.48-7.43 (m, 2H), 7.41-7.36 (m, 1H), 5.96 (s, 1H). **13C NMR** (126 MHz, DMSO) δ 142.6, 138.1, 131.6 (q, *J* = 32.8 Hz), 130.0, 129.7, 129.6 (q, *J* = 2.5 Hz), 128.4, 124.1 (q, *J* = 273.4 Hz), 123.3-123.0 (m), 57.0. **19F NMR** (564 MHz, DMSO) δ -61.29. **HRMS** (ESI) m/z calcd for C15H12F6N [M+H]+ 320.0868, Found: 320.0867.

-----------------------------------------------------------------------------------------------------------------------------------------------------------------------------------------------

**(53)** **naphthalen-2-yl(phenyl)methanamine hydrochloride**

Prepared according to **General procedure D** using *N'*-(naphthalen-2-yl(phenyl) methylene)-2-(trifluor-omethyl) benzenesulfonohydrazide S53ꞌ (0.3 mmol, 136.3 mg) and NH3·H2O (308 μL, 2.4 mmol) afforded compound **53** (63.1 mg, 78% yield) as a white solid (mp: 162-164 oC). **1H NMR** (600 MHz, DMSO) δ 9.39 (d, *J* = 3.6 Hz, 3H), 8.14 (s, 1H), 7.94-7.87 (m, 3H), 7.65 (dd, *J* = 8.4, 1.2 Hz, 1H), 7.61 (d, *J* = 7.8 Hz, 2H), 7.57-7.51 (m, 2H), 7.40 (t, *J* = 7.2 Hz, 2H), 7.33 (t, *J* = 7.2 Hz, 1H), 5.77 (q, *J* = 5.4 Hz, 1H). **13C NMR** (151 MHz, DMSO) δ 139.3, 136.9, 133.6, 133.4, 129.8, 129.5, 129.3, 128.9, 128.7, 128.5, 127.8, 127.7, 127.1, 126.1, 58.3. **IR** (Film): 3472, 2368, 1200, 732 cm-1.

-----------------------------------------------------------------------------------------------------------------------------------------------------------------------------------------------

**(54) phenyl(4-((trimethylsilyl)ethynyl)phenyl)methanamine hydrochloride**

Prepared according to **General procedure D** using *N*'-(phenyl(4-((trimethylsilyl)ethynyl)phenyl) methylene)-2-(trifluoromethyl) benzenesulfonohydrazide S54ꞌ (0.3 mmol, 150.2 mg) and NH3·H2O (308 μL, 2.4 mmol) afforded compound **54** (84.3 mg, 89% yield) as a white solid (mp: 147-149 oC). **1H NMR** (500 MHz, DMSO) δ 9.44 (s, 3H), 7.62-7.56 (m, 4H), 7.48 (d, *J* = 8.5 Hz, 2H), 7.39 (t, *J* = 7.5 Hz, 2H), 7.33 (t, *J* = 7.5 Hz, 1H), 5.66 (s, 1H), 0.21 (s, 9H). **13C NMR** (151 MHz, DMSO) δ 140.1, 139.0, 132.8, 129.7, 129.3, 128.8, 128.5, 122.9, 105.6, 95.8, 57.7, 0.8. **IR** (Film): 3485, 2248, 2123, 1621,1052, 1024, 1005, 820, 757 cm-1.

-----------------------------------------------------------------------------------------------------------------------------------------------------------------------------------------------

**(55)** **benzo[*d*][1,3]dioxol-5-yl(phenyl)methanamine hydrochloride**

Prepared according to **General procedure D** using *N*'-(benzo[*d*][1,3]dioxol-5-yl(phenyl) methylene)-2-(trifluoromethyl) benzenesulfonohydrazide S55ꞌ (0.3 mmol, 134.5 mg) and NH3·H2O (308 μL, 2.4 mmol) afforded **55** (56.6 mg, 83% yield) as a white solid (mp: 160-162 oC). **1H NMR** (500 MHz, DMSO) δ 9.16 (s, 3H), 7.63-7.27 (m, 5H), 7.18 (s, 1H), 6.97 (d, *J* = 28.5 Hz, 2H), 6.02 (s, 2H), 5.54 (s, 1H). **13C NMR** (126 MHz, DMSO) δ 148.4, 148.0, 139.5, 133.1, 129.6, 129.1, 128.1, 122.1, 109.3, 108.8, 102.3, 57.8. **IR** (Film): 3465, 2984, 1736, 1372, 1233, 1043, 937, 846, 785 cm-1.

-----------------------------------------------------------------------------------------------------------------------------------------------------------------------------------------------

**(56) (2-(benzyloxy)phenyl)(3-fluorophenyl)methanamine hydrochloride**

Prepared according to **General procedure D** using(*Z*)-*N'*-((2-(benzyloxy)phenyl)(3-fluorophenyl) methylene)-2-(trifluoromethyl) benzenesulfonohydrazide S56ꞌ (0.3 mmol, 158.4 mg) and NH3·H2O (308 μL, 2.4 mmol) afforded compound **56** (66.1 mg, 68% yield) as a white solid (mp: 153-165 oC). **1H NMR** (500 MHz, DMSO) δ 9.34 (s, 3H), 7.77 (d, *J* = 7.5 Hz, 1H), 7.43-7.38 (m, 1H), 7.38-7.29 (m, 7H), 7.27 (d, *J* = 7.5 Hz, 1H), 7.20-7.15 (m, 1H), 7.12 (d, *J* = 8.5 Hz, 1H), 7.05 (t, *J* = 8.0 Hz, 1H), 5.77 (s, 1H), 5.15 (s, 2H). **13C NMR** (126 MHz, DMSO) δ 162.8 (d, *J* = 244.0 Hz), 155.6, 141.3 (d, *J* = 7.4 Hz), 137.6, 131.5 (d, *J* = 8.2 Hz), 130.7, 129.3, 128.8, 128.5, 128.3, 126.7, 124.9 (d, *J* = 2.1 Hz), 121.7, 116.0 (d, *J* = 21.0 Hz), 115.7 (d, *J* = 22.5 Hz), 70.4, 52.4. **19F NMR** (470 MHz, DMSO) δ (-112.21)-(-112.33) (m).

-----------------------------------------------------------------------------------------------------------------------------------------------------------------------------------------------

**(57) (3-fluorophenyl)(4-methoxyphenyl)methanamine hydrochloride**

Prepared according to **General procedure D** using *N'*-((3-fluorophenyl)(4-methoxyphenyl) methylene)-2-(trifluoromethyl) benzenesulfonohydrazide S57ꞌ (0.3 mmol, 135.6 mg) and NH3·H2O (308 μL, 2.4 mmol) afforded compound **57** (53.0 mg, 70% yield) as a white solid (mp: 154-156 oC). **1H NMR** (500 MHz, DMSO) δ 9.28 (s, 3H), 7.54-7.42 (m, 4H), 7.38 (d, *J* = 6.5 Hz, 1H), 7.38 (d, *J* = 7.0 Hz, 1H), 7.17 (t, *J* = 7.0 Hz, 1H), 6.96 (d, *J* = 8.0 Hz, 2H), 5.61 (s, 1H), 3.74 (s, 3H). **13C NMR** (126 MHz, DMSO) δ 162.9 (d, *J* = 244.0 Hz), 160.1, 142.3 (d, *J* = 6.3 Hz), 131.7 (d, *J* = 7.6 Hz), 130.8, 129.8, 124.3 (d, *J* = 1.3 Hz), 115.8 (d, *J* = 21.4 Hz), 115.1 (d, *J* = 22.4 Hz), 115.0, 56.9, 56.1. **19F NMR** (470 MHz, DMSO) δ (-112.21)-(-112.33) (m).

-----------------------------------------------------------------------------------------------------------------------------------------------------------------------------------------------

**(58)** **methyl 4-(amino(4-methoxyphenyl)methyl)benzoate hydrochloride**

Prepared according to **General procedure D** using methyl 4-((4-methoxyphenyl) (2-((2-(trifluoromethyl)phenyl)sulfonyl)hydrazono)methyl) benzoate S58ꞌ (0.3 mmol, 147.7 mg) and NH3·H2O (308 μL, 2.4 mmol) afforded compound **58** (80.3 mg, 87% yield) as a white solid (mp: 173-175 oC). **1H NMR** (500 MHz, DMSO) δ 9.32 (s, 3H), 7.97 (d, *J* = 8.0 Hz, 2H), 7.70 (d, *J* = 8.0 Hz, 2H), 7.47 (d, *J* = 8.5 Hz, 2H), 6.96 (d, *J* = 8.5 Hz, 2H), 5.69 (q, *J* = 5.0 Hz, 1H), 3.84 (s, 3H), 3.73 (s, 3H). **13C NMR** (126 MHz, DMSO) δ 166.8, 160.2, 144.7, 130.7, 130.4, 130.2, 130.0, 128.5, 115.1, 57.2, 56.2, 53.2. **IR** (Film): 3472, 3002, 2970, 2657, 2249, 2124, 1672, 1281, 1053, 1025, 1006, 823, 775, 726 cm-1.

-----------------------------------------------------------------------------------------------------------------------------------------------------------------------------------------------

**(59)** **methyl 4-(amino(4-(methylthio)phenyl)methyl)benzoate hydrochloride**

Prepared according to **General procedure D** using 4-((4-(methylthio)phenyl)(2-((2-(trifluoromethyl) phenyl)sulfonyl)hydrazono)methyl) benzoate S59ꞌ (0.3 mmol, 152.6 mg) and NH3·H2O (308 μL, 2.4 mmol) afforded compound **59** (66.1 mg, 68% yield) as a white solid (mp: 171-173 oC). **1H NMR** (500 MHz, DMSO) δ 9.41 (s, 3H), 7.98 (d, *J* = 8.5 Hz, 2H), 7.72 (d, *J* = 8.0 Hz, 2H), 7.50 (d, *J* = 8.0 Hz, 2H), 7.29 (d, *J* = 8.5 Hz, 2H), 5.72 (s, 1H), 3.84 (s, 3H), 2.45 (s, 3H). **13C NMR** (126 MHz, DMSO) δ 166.7, 144.4, 139.8, 135.1, 130.4, 130.3, 129.1, 128.7, 126.9, 57.2, 53.2, 15.4. **IR** (Film): 3441, 3043, 2976, 2657, 2249, 2124, 1720, 1281, 1053, 1025, 1006, 819, 775, 726 cm-1.

-----------------------------------------------------------------------------------------------------------------------------------------------------------------------------------------------

**(60)** **(9,9-dimethyl-9*H*-fluoren-2-yl)(3-fluorophenyl)methanamine hydrochloride**

Prepared according to **General procedure D** using *N*'-((3-fluorophenyl)(4-methoxyphenyl) methylene)-2-(trifluoromethyl) benzenesulfonohydrazide S60ꞌ (0.3 mmol, 161.6 mg) and NH3·H2O (308 μL, 2.4 mmol) afforded compound **60** (98.7 mg, 93% yield) as a white solid (mp: 161-163 oC). **1H NMR** (500 MHz, DMSO) δ 9.34 (s, 3H), 7.93 (s, 1H), 7.87 (d, *J* = 8.0 Hz, 1H), 7.85-7.82 (m, 1H), 7.59-7.51 (m, 3H), 7.50-7.44 (m, 2H), 7.38-7.30 (m, 2H), 7.20 (t, *J* = 8.0 Hz, 1H), 5.73 (s, 1H), 1.434 (s, 3H), 1.427 (s, 3H). **13C NMR** (126 MHz, DMSO) δ 163.0 (d, *J* = 244.0 Hz), 154.8, 154.4, 142.2 (d, *J* = 7.0 Hz), 139.7, 138.7, 137.9, 131.9 (d, *J* = 8.2 Hz), 128.7, 128.1, 127.3, 124.5 (d, *J* = 2.6 Hz), 123.8, 123.0, 121.4, 116.0 (d, *J* = 21.4 Hz), 115.2 (d, *J* = 22.7 Hz), 57.9, 47.5, 27.79, 27.76. **19F NMR** (470 MHz, DMSO) δ (-112.21)-(-112.33) (m). **IR** (Film): 3481, 2248, 1053, 2014, 1005, 820, 757 cm-1.

-----------------------------------------------------------------------------------------------------------------------------------------------------------------------------------------------

**(61)** **benzofuran-2-yl(3-fluorophenyl)methanamine**

Prepared according to **General procedure C** using *N*'-(benzofuran-2-yl(3-fluorophenyl) methylene)-2-(trifluoromethyl) benzenesulfonohydrazide S61ꞌ (0.3 mmol, 138.7 mg) and NH3·H2O (308 μL, 2.4 mmol) afforded compound **61** (49.2 mg, 68% yield) as a colourless oil. **1H NMR** (500 MHz, CDCl3) δ 7.52 (d, *J* = 7.5 Hz, 1H), 7.43 (d, *J* = 8.0 Hz, 1H), 7.37-7.30 (m, 1H), 7.26-7.17 (m, 4H), 7.01 (td, *J* = 8.5, 2.5 Hz, 1H), 6.55 (s, 1H), 5.34 (s, 1H), 2.14 (s, 2H). **13C NMR** (126 MHz, CDCl3) δ 163.0 (d, *J* = 246.5 Hz), 159.6, 155.0, 144.2 (d, *J* = 6.8 Hz), 131.2, 130.2 (d, *J* = 8.1 Hz), 128.1, 124.1, 122.83, 122.76 (d, *J* = 3.0 Hz), 121.0, 114.8 (d, *J* = 21.2 Hz), 114.1 (d, *J* = 22.2 Hz), 111.2, 103.0, 54.0. **19F NMR** (564 MHz, CDCl3) δ (-112.46)-(-112.58) (m). **IR** (Film): 3427, 2986, 2253, 1264, 904, 725 cm-1.

-----------------------------------------------------------------------------------------------------------------------------------------------------------------------------------------------

**(62)** **benzo[*b*]thiophen-2-yl(3-(trifluoromethyl)phenyl)methanamine hydrochloride**

Prepared according to **General procedure D** using *N'*-(benzo[*b*]thiophen-2-yl(4-(trifluoromethyl) phen-yl)methylene)-2-(trifluoromethyl) benzenesulfonohydrazide S62ꞌ (0.3 mmol, 158.5 mg) and NH3·H2O (308 μL, 2.4 mmol) afforded compound **62** (83.5 mg, 81% yield) as a white solid (mp: 148-150 oC). **1H NMR** (500 MHz, DMSO) δ 9.69 (s, 3H), 7.97-7.83 (m, 6H), 7.72 (s, 1H), 7.44-7.32 (m, 2H), 6.22 (s, 1H). **13C NMR** (126 MHz, DMSO) δ 142.8, 142.0, 140.3, 139.7, 130.2 (q, *J* = 31.5 Hz), 129.5, 126.7 (q, *J* = 3.8 Hz), 126.0, 125.8, 125.01, 124.96, 124.95 (q, *J* = 272.2 Hz), 123.5, 53.6. **19F NMR** (470 MHz, DMSO) δ -61.14. **IR** (Film): 3477, 2249, 2123, 1052, 1024, 1005, 820, 757 cm-1.

-----------------------------------------------------------------------------------------------------------------------------------------------------------------------------------------------

**(63) benzo[*b*]thiophen-2-yl(thiophen-3-yl)methanamine**

Prepared according to **General procedure C** using (*Z*)-*N'*-(benzo[*b*]thiophen-2-yl(thiophen-3-yl) methylene)-2-(trifluoromethyl) benzenesulfonohydrazide S63ꞌ (0.3 mmol, 140.0 mg) and NH3·H2O (308 μL, 2.4 mmol) afforded compound **63** (46.4 mg, 63% yield) as a colourless oil. **1H NMR** (500 MHz, CDCl3) δ 7.78 (d, *J* = 7.5 Hz, 1H), 7.67 (d, *J* = 7.5 Hz, 1H), 7.33-7.28 (m, 3H), 7.26 (s, 1H), 7.13 (s, 1H), 7.11 (dd, *J* = 4.5, 1.0 Hz, 1H), 5.57 (s, 1H), 1.94 (s, 2H). **13C NMR** (126 MHz, CDCl3) δ 150.9, 145.6, 139.6, 139.5, 126.5, 126.2, 124.2, 124.0, 123.3, 122.4, 121.2, 120.3, 52.6. **IR** (Film): 3402, 3006, 2952, 2253, 902, 723 cm-1.

-----------------------------------------------------------------------------------------------------------------------------------------------------------------------------------------------

**(64)** **benzofuran-2-yl(thiophen-3-yl)methanamine**

Prepared according to **General procedure C** using *N'*-(benzofuran-2-yl(thiophen-3-yl) methylene)-2-(trifluoromethyl) benzenesulfonohydrazide S64ꞌ (0.3 mmol, 135.1 mg) and NH3·H2O (308 μL, 2.4 mmol) afforded compound **64** (47.5 mg, 69% yield) as a colourless oil. **1H NMR** (600 MHz, CDCl3) δ 7.51 (d, *J* = 7.8 Hz, 1H), 7.43 (d, *J* = 7.8 Hz, 1H), 7.33-7.28 (m, 2H), 7.24 (d, *J* = 7.2 Hz, 1H), 7.20 (t, *J* = 7.2 Hz, 1H), 7.13 (d, *J* = 4.8 Hz, 1H), 6.51 (s, 1H), 5.38 (s, 1H), 2.15 (s, 2H). **13C NMR** (126 MHz, CDCl3) δ 160.2, 154.9, 143.0, 128.2, 126.7, 126.1, 124.0, 122.7, 121.7, 120.9, 111.2, 102.4, 50.4. **IR** (Film): 3372, 3106, 2922, 1454, 906, 730 cm-1.

-----------------------------------------------------------------------------------------------------------------------------------------------------------------------------------------------

**(65)** **benzofuran-3-yl(phenyl)methanamine hydrochloride**

Prepared according to **General procedure D** using *N*'-(benzofuran-3-yl(phenyl) methylene)-2-(*tri*-fluoromethyl) benzenesulfonohydrazide S65ꞌ (0.3 mmol, 133.3 mg) and NH3·H2O (308 μL, 2.4 mmol) afforded compound **65** (51.4 mg, 66% yield) as a white solid (mp: 162-164 oC). **1H NMR** (600 MHz, DMSO) δ 9.57 (s, 3H), 7.70-7.63 (m, 3H), 7.55 (d, J = 8.4 Hz, 1H), 7.49-7.39 (m, 3H), 7.31 (t, *J* = 7.8 Hz, 1H), 7.26 (t, *J* = 7.8 Hz, 1H), 7.07 (s, 1H), 5.90 (s, 1H). **13C NMR** (151 MHz, DMSO) δ 155.2, 154.4, 136.2, 130.0, 129.8, 129.0, 128.3, 125.9, 124.3, 122.6, 112.1, 106.6, 52.4. **IR** (Film): 3442, 3052, 2361, 2253, 1264, 904, 725 cm-1.

-----------------------------------------------------------------------------------------------------------------------------------------------------------------------------------------------

**(66)** **furan-3-yl(phenyl)methanamine hydrochloride**

Prepared according to **General procedure D** using *N*'-(furan-3-yl(phenyl) methylene)-2-(trifluoromethyl) benzenesulfonohydrazide S66ꞌ (0.3 mmol, 118.3 mg) and NH3·H2O (308 μL, 2.4 mmol) afforded compound **66** (48.4 mg, 77% yield) as a white solid (mp: 166-168 oC). **1H NMR** (500 MHz, DMSO) δ 9.20 (s, 3H), 7.64 (s, 1H), 7.61-7.54 (m, 3H), 7.42 (t, *J* = 6.5 Hz, 2H), 7.38-7.33 (m, 1H), 7.26 (d, *J* = 3.5 Hz, 1H), 5.67 (s, 1H). **13C NMR** (151 MHz, DMSO) δ 140.2, 138.9, 129.6, 129.2, 128.3, 128.2, 127.8, 124.6, 54.2. **IR** (Film): 3445, 2248, 1052, 1024, 1005, 820, 757 cm-1.

-----------------------------------------------------------------------------------------------------------------------------------------------------------------------------------------------

**(67)** **phenyl(thiophen-3-yl)methanamine hydrochloride**

Prepared according to **General procedure D** using *N'*-(phenyl(thiophen-3-yl) methylene)-2-(trifluoromethyl) benzenesulfonohydrazide S67ꞌ (0.3 mmol, 123.1 mg) and NH3·H2O (308 μL, 2.4 mmol) afforded compound **67** (42.7 mg, 63% yield) as a white solid (mp: 159-161 oC). **1H NMR** (500 MHz, DMSO) δ 9.13 (s, 3H), 7.69 (d, *J* = 0.5 Hz, 2H), 7.58 (d, *J* = 7.5 Hz, 2H), 7.43 (t, *J* = 7.0 Hz, 2H), 7.37 (t, *J* = 7.0 Hz, 1H), 6.70 (s, 1H), 5.52 (q, *J* = 4.5 Hz, 1H). **13C NMR** (151 MHz, DMSO) δ 145.0, 141.8, 138.6, 129.7, 129.4, 128.4, 124.6, 110.8, 50.7. **IR** (Film): 3439, 2249, 2124, 1052, 1024, 1005, 820, 758 cm-1.

-----------------------------------------------------------------------------------------------------------------------------------------------------------------------------------------------

**(68)** **ethyl 2-amino-2-(p-tolyl)acetate**

Prepared according to **General procedure C** using ethyl (*Z*)-2-(*p*-tolyl)-2-(2-((2-(trifluoromethyl) phenyl)sulfonyl)hydrazineylidene) acetate S68ꞌ (0.3 mmol, 124.2 mg) and NH3·H2O (308 μL, 2.4 mmol) afforded compound **68** (46.9 mg, 81% yield) as a colourless oil. **1H NMR** (500 MHz, CDCl3) δ 7.26 (d, *J* = 8.0 Hz, 2H), 7.16 (d, *J* = 8.0 Hz, 2H), 4.55 (s, 1H), 4.24-4.07 (m, 2H), 2.34 (s, 3H), 1.93 (s, 2H), 1.21 (t, *J* = 7.5 Hz, 3H). **13C NMR** (126 MHz, CDCl3) δ 174.1, 137.6, 137.5 129.4, 126.6, 61.2, 58.5, 21.1, 14.0.

Spectroscopic data are in agreement with those reported in the literature.5

-----------------------------------------------------------------------------------------------------------------------------------------------------------------------------------------------

**(69)** **ethyl 2-amino-2-(4-chlorophenyl)acetate**

Prepared according to **General procedure C** using ethyl 2-(4-chlorophenyl)-2-(2-((2-(trifluoromethyl) phenyl)sulfonyl)hydrazono) acetate S69ꞌ (0.3 mmol, 130.4 mg) and NH3·H2O (308 μL, 2.4 mmol) afforded compound **69** (50.0 mg, 78% yield) as a colourless oil. **1H NMR** (500 MHz, CDCl3) δ 7.33-7.30 (s, 4H), 4.58 (s, 1H), 4.24-4.09 (m, 2H), 1.86 (s, 2H), 1.21 (t, *J* = 7.0 Hz, 3H). **13C NMR** (126 MHz, CDCl3) δ 173.6, 138.8, 133.8, 128.8, 128.2, 61.5, 58.1, 14.0. **HRMS** (ESI) m/z calcd for C10H12ClNNaO2 [M+Na]+ 236.0449, Found: 236.0438.

Spectroscopic data are in agreement with those reported in the literature.5

-----------------------------------------------------------------------------------------------------------------------------------------------------------------------------------------------

1. **Preparation of Starting Materials**

**4.1 Synthesis and analytical data of new diazo compounds**

**Route A**

According to the literature,8 tetrakis(triphenylphosphine)palladium (0.25 mmol, 0.3 g), iodobenzene (5 mmol), silver carbonate (2.5 mmol, 0.7 g) and triethylamine (6.5 mmol, 0.9 mL) suspended in toluene (20 mL) in a 50 mL Schlenk tube under nitrogen. ethyl diazoacetate (6.5 mmol) was then added. The resulting solution was stirred at room temperature for 4 hours, then filtered through a short path of silica gel and eluted with ethyl acetate. The volatile compounds were removed in vacuo and the residue was purified by column chromatography (petroleum ether: ethyl acetate = 10:1) to obtain the product α-aryl diazoester.

**Route B**

According to the literature,9 the ester (5.0 mmol) and tosyl azide (15.0 mmol) were added to a mixture in anhydrous MeCN (15.0 mL) followed by slow addition of 1,8-diazabicyclo[5.4.0]undecane yl-7-ene (DBU) (1.1 mL, 1.1 g, 7.5 mmol). The reaction mixture was stirred at room temperature overnight. After complete consumption of starting material, the reaction mixture was quenched with saturated aqueous NH4Cl, extracted with CH2Cl2, washed with brine, dried over MgSO4, and concentrated under reduced pressure to give the product. The residue was purified by flash chromatography (hexane/EtOAc, 9:1) to give the α-diazo ester.

**Route C**

Diaryl ketones were synthesized were prepared according to reported literature.10

A 100 mL round-bottom flask containing diaryl ketone (5.0 mmol, 1.0 Equiv), hydrazine hydrate (50.0 mmol, 10.0 Equiv), HOAc (one drop) and ethanol (10 mL) was refluted for 12 h. After cooling to room temperature, the solvent EtOH was removed in vacuum to obtain the crude product. The crude product was purified by silica gel column chromatography to obtain the desired diaryl hydrazone.

Diaryl hydrazone (2.0 mmol, 1.0 equiv) was dissolved in 15 mL DCM in a 50 mL round-bottom flask. After cooling to 0 ℃, anhydrous MgSO4 (2.4 mmol, 1.2 equiv) and activated MnO2 (10.0 mmol, 5.0 equiv) were added to the stirring mixture. The reaction mixture was maintained at 0 oC for another hour. After the reaction is complete, the reaction mixture is leached out as a solid with diatomite. The solvent was removed under reduced pressure and the crude product was obtained. The crude product was purified by silica gel column chromatography to obtain the desired diaryl diazomethane.

**Route D**

According to the literature,11 a suspension of potassium *N*-iodo *p*-toluenesulfonamide12 (TSNIK, 369.0 mg, 1.1 mmol) in a solution of hydrazone in THF (1.0 mmol in 4.0 mL) was prepared. THF was added to a mixture of the hydrazone and potassium *N*-iodo *p*-toluenesulfonamide. Aqueous potassium hydroxide was slowly added to the THF suspension (so that the final volume ratio KOH: THF was equal to 1:4). the reaction was complete after stirring for 1 h at room temperature. The mixture was poured into aqueous potassium hydroxide and extracted with ether. The ethereal phase was washed with aqueous potassium hydroxide, saturated brine and dried over MgSO4. Removal of the solvent under reduced pressure and purified by column chromatography to obtain the desired diaryl diazomethane.

**Analytical data of new diazo compounds**

Orange yellow oil, yield: 85%. **1H NMR** (500 MHz, CDCl3) δ 7.59-7.53 (m, 6H), 7.47–7.42 (m, 2H), 4.36 (q, *J* = 7.0 Hz, 2H), 1.36 (t, *J* = 7.0 Hz, 3H). **13C NMR** (126 MHz, CDCl3) δ 165.1, 139.2, 137.2, 132.0, 128.4, 127.3, 125.1, 124.3, 121.6, 61.1, 14.5. **HRMS** (ESI) m/z calculated for C16H13BrN2NaO2 [M+Na]+ 367.0058, found 367.0060.

-----------------------------------------------------------------------------------------------------------------------------------------------------------------------------------------------

Orange yellow oil, yield: 84%.**1H NMR** (600 MHz, CDCl3) δ 8.12 (d, *J* = 1.8 Hz, 1H), 7.60 (dd, *J* = 8.4 Hz, 1.8 Hz, 1H), 7.34 (d, *J* = 8.4 Hz, 1H), 4.36 (q, *J* = 7.2 Hz, 2H), 2.57 (s, 3H), 1.36 (t, *J* = 7.2 Hz, 3H). **13C NMR** (151 MHz, CDCl3) δ 164.3, 149.5, 133.2, 130.3, 127.4, 125.5, 119.3, 61.3, 19.9, 14.4.

-----------------------------------------------------------------------------------------------------------------------------------------------------------------------------------------------

**(S70)** α-Aryl diazoester were synthesized were prepared according to **route B**. **1H NMR** (500 MHz, CDCl3) δ 7.48 (d, *J* = 7.5 Hz, 2H), 7.37 (t, *J* = 8.0 Hz, 2H), 7.17 (t, *J* = 7.0 Hz, 1H), 5.39 (t, *J* = 7.0 Hz, 1H), 4.79 (d, *J* = 7.0 Hz, 2H), 2.06-1.98 (m, 2H), 1.73 (s, 3H), 1.55-1.48 (m, 1H), 1.44-1.33 (m, 4H), 1.30-1.20 (m, 8H), 1.18-1.09 (m, 3H), 1.09-1.01 (m, 3H), 0.88-0.82 (m, 12H). **13C NMR** (126 MHz, CDCl3) δ 165.3, 143.1, 128.9, 125.7, 124.0, 118.1, 61.9, 39.9, 39.4, 37.44, 37.38, 37.3, 36.6, 32.8, 32.7, 28.0, 25.0, 24.8, 24.5, 22.7, 22.6, 19.8, 19.7, 16.5. **HRMS** (ESI) m/z calculated for C28H44N2O2Na [M+Na]+ 463.3300, found 463.3322.

-----------------------------------------------------------------------------------------------------------------------------------------------------------------------------------------------

**(S71)** α-Aryl diazoester were synthesized were prepared according to **route B**. **1H NMR** (500 MHz, CDCl3) δ 7.59-7.55 (m, 2H), 7.41 (t, *J* = 8.0 Hz, 2H), 7.21 (t, *J* = 7.5 Hz, 1H), 2.61 (t, *J* = 7.0 Hz, 2H), 2.11 (s, 3H), 2.09 (s, 3H), 2.05 (s, 3H), 1.87-1.72 (m, 2H), 1.59-1.50 (m, 3H), 1.46-1.21 (m, 15H), 1.17-1.02 (m, 6H), 0.89-0.82 (m, 12H). **13C NMR** (126 MHz, CDCl3) δ 163.7, 149.6, 140.0, 129.0, 127.1, 125.9, 125.4, 125.3, 123.9, 123.2, 117.5, 75.1, 39.4, 37.4, 37.3, 32.8, 32.7, 31.2, 28.0, 24.8, 24.4, 22.7, 22.6, 21.0, 20.6, 19.74, 19.65, 13.1, 12.2, 11.8. **HRMS** (ESI) m/z calculated for C37H54N2NaO3 [M+Na]+ 597.4032, found 597.4036.

-----------------------------------------------------------------------------------------------------------------------------------------------------------------------------------------------

**(S72)** α-Aryl diazoester were synthesized were prepared according to **route B**. **1H NMR** (500 MHz, CDCl3) δ 7.39 (d, *J* = 7.5 Hz, 2H), 7.29 (t, *J* = 8.0 Hz, 2H), 7.09 (t, *J* = 7.5 Hz, 1H), 6.18 (d, *J* = 11.0 Hz, 1H), 5.97 (d, *J* = 11.0 Hz, 1H), 5.13-5.07 (m, 1H), 5.01 (d, *J* = 2.1 Hz, 1H), 4.79 (d, *J* = 2.1 Hz, 1H), 2.77-2.71 (m, 1H), 2.59 (dd, *J* = 13.4, 3.5 Hz, 1H), 2.44-2.30 (m, 2H), 2.18 (ddd, *J* = 13.5, 8.5, 4.5 Hz, 1H), 2.00-1.88 (m, 3H), 1.81-1.75 (m, 2H), 1.66-1.55 (m, 2H), 1.47-1.39 (m, 3H), 1.34-1.16 (m, 7H), 1.13-1.00 (m, 3H), 0.97-0.90 (m, 1H), 0.85 (d, *J* = 6.4 Hz, 3H), 0.82-0.75 (m, 6H), 0.48 (s, 3H). **13C NMR** (126 MHz, CDCl3) δ 164.8, 144.6, 142.6, 134.1, 128.96, 128.91, 125.7, 124.0, 122.8, 117.5, 112.8, 72.7, 56.6, 56.4, 45.9, 42.4, 40.6, 39.5, 36.2, 32.06, 32.05, 29.1, 28.0, 27.7, 23.9, 23.6, 22.8, 22.6, 22.3, 18.9, 12.0.

-----------------------------------------------------------------------------------------------------------------------------------------------------------------------------------------------

**(S73)** α-Aryl Diazoester were synthesized were prepared according to **route B**. **1H NMR** (500 MHz, CDCl3) δ 7.51-7.47 (m, 2H), 7.41-7.36 (m, 2H), 7.21-7.16 (m, 1H), 5.12-5.07 (m, 1H), 4.36-4.27 (m, 2H), 2.08-1.91 (m, 2H), 1.79-1.71 (m, 1H), 1.68 (d, *J* = 0.8 Hz, 3H), 1.64-1.56 (m, 4H), 1.55-1.47 (m, 1H), 1.42-1.33 (m, 1H), 1.26-1.17 (m, 1H), 0.94 (d, *J* = 6.5 Hz, 3H). **13C NMR** (126 MHz, CDCl3) δ 165.3, 131.4, 128.9, 125.7, 125.6, 124.5, 123.9, 63.5, 37.0, 35.6, 29.5, 25.7, 25.4, 19.4, 17.7.

-----------------------------------------------------------------------------------------------------------------------------------------------------------------------------------------------

**(S74)** Diazoester were synthesized were prepared according to the literature13, Orange yellow oil, yield: 45%. **1H NMR** (500 MHz, CDCl3) δ 7.32 (t, *J* = 8.0 Hz, 1H), 7.17 (d, *J* = 7.5 Hz, 1H), 7.09-7.01 (m, 3H), 6.99-6.96 (m, 2H), 6.94-6.91 (m, 1H), 5.00 (s, 2H). **13C NMR** (126 MHz, CDCl3) δ 157.2, 134.9, 129.6, 128.9, 128.7, 125.1, 124.8, 123.5, 123.3, 123.0, 121.2, 117.8, 74.8.

-----------------------------------------------------------------------------------------------------------------------------------------------------------------------------------------------

**4.2 Synthesis and analytical data of *N*-triftosylhydrazones**

**Route E.**

According to the literature,14to a stirred solution of TfsNHNH2 (2.0 mmol, 1.2 equiv) in CH3OH (2 mL) were added aryl ketone (2.2 mmol, 1.0 equiv) and boron trifluoride diethyl etherate, then the mixture was stirred at 40 oC. The progress of the reaction was monitored by TLC. Upon consumption of the starting material, the solvent was removed in vacuo and the residue was purified by flash chromatography on silica gel to afford the *N*-triftosylhydrazones. The yields were around 50-90% in general.

*Note: Part of the N-triftosylhydrazone was obtained as two isomers, which was used in the next step without further purification. Both isomers can be used as donor/donore carbene precursor under standard conditions.*

**Analytical data of *N*-triftosylhydrazones**

**(S32')** Light yellow oil, m.p. 148-150 oC, yield: 80%. **1H NMR** (600 MHz, CDCl3) δ 11.81 (s, 1H), 8.40-8.33 (m, 1H), 7.84-7.82 (m, 1H), 7.70-7.66 (m, 2H), 7.50-7.47 (m, 2H), 7.33-7.28 (m, 3H), 5.08-5.04 (m, 1H), 1.93-1.86 (m, 2H), 1.69-1.63 (m, 2H), 1.54-1.48 (m, 3H), 1.42-1.34 (m, 2H), 1.30-1.22(m, 1H).**13C NMR** (151 MHz, CDCl3) δ 161.2, 134.0, 136.6, 133.5, 132.8, 132.3, 129.4, 128.3, 128.2 (q, *J* = 6.3 Hz), 127.8, 127.6 (q, *J* = 33.3 Hz), 122.6 (q, *J* = 274.0 Hz), 75.7, 31.0, 24.8, 23.2. **19F NMR** (470 MHz, CDCl3) δ -58.00. **HRMS** (ESI) m/z calculated for C21H21F3N2O4SNa [M+Na]+ 477.1083, found 477.1085.-----------------------------------------------------------------------------------------------------------------------------------------------------------------------------------------------

(**S33'**) White solid, m.p. 180-184 oC, yield: 90%. **1H NMR** (500 MHz, DMSO) δ 10.92 (s, 1H), 8.10 (d, *J* = 7.6 Hz, 1H), 8.04 (d, *J* = 7.6 Hz, 1H), 7.95 (t, *J* = 7.6 Hz, 1H), 7.88 (t, *J* = 7.6 Hz, 1H), 7.60-7.53 (m, 3H), 7.40-7.35 (m, 1H), 7.34-7.27 (m, 4H), 7.25-7.20 (m, 2H). **13C NMR** (126 MHz, DMSO) δ 154.9, 138.3, 136.9, 133.3, 133.2, 132.4, 130.9, 129.9, 129.6, 129.1, 128.7, 128.4, 128.3 (d, *J* = 6.3 Hz), 127.2, 126.7 (d, *J* = 32.8 Hz), 122.8 (d, *J* = 274.8 Hz). **19F NMR** (470 MHz, DMSO) δ -58.21.

Spectroscopic data in agreement with those reported in literature (*31*).

-----------------------------------------------------------------------------------------------------------------------------------------------------------------------------------------------

**(S37')** White solid, m.p. 203-207 oC, yield: 87%. **1H NMR** (500 MHz, DMSO) δ 12.04 (s, 1H), 8.35 (d, *J* = 8.0 Hz, 1H), 8.27 (d, *J* = 7.5 Hz, 1H), 8.09 (d, *J* = 8.0 Hz, 1H), 7.99 (t, *J* = 7.8 Hz, 1H), 7.95-7.86 (m, 2H), 7.81 (d, *J* = 7.5 Hz, 1H), 7.60-7.55 (m, 1H), 7.53-7.48 (m, 2H), 7.46-7.42 (m, 1H), 7.33-7.28 (m, 1H). **13C NMR** (126 MHz, DMSO) δ 152.9, 142.2, 140.2, 138.1, 136.3, 134.0, 133.6, 132.5, 131.8, 131.4, 129.5, 128.8, 128.71 (q, *J* = 6.6 Hz), 128.70, 128.5, 127.7 (q, *J* = 32.9 Hz), 123.3 (q, *J* = 274.7 Hz), 122.0, 121.1, 120.9. **19F NMR** (470 MHz, DMSO) δ -55.72. **HRMS** (ESI) m/z calculated for C20H13F3N2O2SNa [M+Na]+ 425.0655, found 425.0658.-----------------------------------------------------------------------------------------------------------------------------------------------------------------------------------------------

**(S40')** White solid, m.p. 160-162 oC, yield: 82%; **1H NMR** (500 MHz, CDCl3) δ 8.50 (d, *J* = 8.0 Hz, 1H), 7.89 (d, *J* = 7.5 Hz, 1H), 7.82 (d, *J* = 7.5 Hz, 1H), 7.79-7.72 (m, 2H), 7.34-7.30 (m, 2H), 7.29-7.23 (m, 2H), 7.19-7.13 (m, 2H), 6.94 (t, *J* = 8.7 Hz, 2H). **13C NMR** (151 MHz, CDCl3) δ 163.9 (d, *J* = 251.4 Hz), 163.6 (d, *J* = 251.4 Hz), 152.9, 136.8, 133.7, 133.5, 132.4, 132.3 (d, *J* = 3.0 Hz), 130.4 (d, *J* = 9.1 Hz), 129.4 (d, *J* = 9.1 Hz), 128.4 (q, *J* = 6.0 Hz), 127.7 (q, *J* = 31.7 Hz), 126.5 (d, *J* = 4.5 Hz), 122.7 (q, *J* = 273.3 Hz), 117.2 (d, *J* = 22.7 Hz), 115.4 (d, *J* = 22.7 Hz). **19F NMR** (564 MHz, CDCl3) δ -58.31 (s), (-108.64)-(-108.84) (m), (-109.97)-(-110.17) (m). **HRMS** (ESI) m/z calculated for C20H13F5N2O2SNa [M+Na]+ 463.1514, found 463.1514.-----------------------------------------------------------------------------------------------------------------------------------------------------------------------------------------------

**(S45')** White solid, m.p. 158-160 oC, yield: 85%. major:minor = 6.7:1; **1H NMR** (600 MHz, DMSO) δ 11.22 (s, minor, 1H), 11.10 (s, major, 1H), 8.07 (d, *J* = 7.8 Hz, major, 1H, minor, 1H), 8.05-8.02 (m, major, 1H, minor, 1H), 7.94 (t, *J* = 7.8 Hz, major, 1H, minor, 1H), 7.88 (t, *J* = 7.8 Hz, major, 1H, minor, 1H), 7.65-7.62 (m, minor, 2H), 7.60-7.54 (m, major, 3H), 7.42-7.39 (m, major, 2H), 7.38-7.36 (m, minor, 1H), 7.34-7.32 (m, minor, 4H), 7.32-7.28 (m, major, 2H), 7.25-7.21 (m, major, 2H, minor, 2H). **13C NMR** (126 MHz, DMSO) δ 199.9, 163.0 (d, *J* = 249.5 Hz), 153.9, 153.6, 138.2, 136.8, 133.5 (d, *J* = 3.8 Hz), 133.3, 133.2, 132.2, 131.2 (d, *J* = 8.8 Hz), 130.8, 129.9, 129.7, 129.5, 129.4, 129.1, 128.6, 128.4, 128.3 (q, *J* = 6.3 Hz), 127.2, 126.7 (q, *J* = 34.0 Hz), 122.8 (q, *J* = 274.7 Hz), 116.1 (d, *J* = 22.1 Hz), 115.4 (d, *J* = 22.1 Hz).**19F NMR** (470 MHz, DMSO) δ (-56.01)-(-56.04) (m, major + minor), (-111.15)-(-111.30) (m, major), (-111.55)-(-111.70) (m, minor). **HRMS** (ESI) m/z calculated for C20H14F4N2O2SNa [M+Na]+ 445.3814, found 445.3818.-----------------------------------------------------------------------------------------------------------------------------------------------------------------------------------------------

(**S46'**) White solid, m.p. 170-171 oC, yield: 85%. major:minor = 2:1; **1H NMR** (500 MHz, DMSO) δ 11.11 (s, minor, 1H), 10.99 (s, major, 1H), 8.10-8.05 (m, major, 1H, minor, 1H), 8.03 (d, *J* = 7.6 Hz, major, 1H, minor, 1H), 7.94 (t, *J* = 7.6 Hz, major, 1H, minor, 1H), 7.88 (t, *J* = 7.6 Hz, major, 1H, minor, 1H), 7.61-7.54 (m, major, 2H, minor, 2H), 7.44-7.21 (m, major, 5H, minor, 7H), 7.20-7.14 (m, major, 2H). **13C NMR** (126 MHz, DMSO) δ 154.0, 138.7, 137.1, 136.3, 135.1, 133.8, 133.7, 131.8, 132.34, 131.30, 131.2, 130.4, 130.2, 129.7, 129.6, 129.3, 129.1, 129.0, 128.9, 128.8 (q, *J* = 6.3 Hz), 127.6, 127.2 (q, *J* = 32.8 Hz), 123.3 (d, *J* = 274.7 Hz). **19F NMR** (470 MHz, DMSO) δ -56.01 (minor), -56.03 (major). **HRMS** (ESI) m/z calculated for C20H14ClF3N2O2SNa [M+Na]+ 461.2753, found 461.2755.-----------------------------------------------------------------------------------------------------------------------------------------------------------------------------------------------

**(S51')** White solid, m.p. 160-162 oC, yield: 81%.major:minor = 1:1; **1H NMR** (500 MHz, CDCl3) δ 8.53-8.49 (m, 2H), 7.87 (d, *J* = 7.5 Hz, 2H), 7.84-7.78 (m, 4H), 7.74 (t, *J* = 7.5 Hz, 2H), 7.59-7.53 (m, 5H), 7.38-7.31 (m, 5H), 7.30-7.23 (m, 4H), 7.15-7.11 (m, 4H), 6.78 (dd, *J* = 17.5, 11.0 Hz, 1H), 6.66 (dd, *J* = 17.5, 11.0 Hz, 1H), 5.88 (d, *J* = 17.5, 1H), 5.74 (d, *J* = 17.5 Hz, 1H), 5.41 (d, *J* = 11.0 Hz, 1H), 5.27 (d, *J* = 11.0 Hz, 1H). **13C NMR** (126 MHz, CDCl3) δ 154.8, 154.7, 139.5, 139.2, 137.0, 136.1, 136.0, 135.7, 135.4, 133.8, 133.7, 133.3, 132.3, 130.8, 130.2, 130.0, 129.9, 129.8, 128.4, 128.3 (q, *J* = 6.3 Hz), 128.2, 128.1, 127.8 (q, *J* = 32.9 Hz), 127.7, 127.6, 127.4, 126.0, 122.70 (d, *J* = 274.7 Hz), 122.69 (d, *J* = 274.7 Hz), 116.1, 115.2. **19F NMR** (470 MHz, CDCl3) δ -58.28 (s), -58.31 (s). **HRMS** (ESI) m/z calculated for C22H17F3N2O2SNa [M+Na]+ 453.2846, found 453.2848.-----------------------------------------------------------------------------------------------------------------------------------------------------------------------------------------------

**(S66')** White solid, m.p. 147-149 oC, yield: 84%. *Z*：*E* = 1:1; **1H NMR** (500 MHz, CDCl3) δ 8.50 (d, *J* = 7.6 Hz, 1H), 8.47 (d, *J* = 7.6 Hz, 1H), 8.02 (s, 1H), 7.86 (d, *J* = 7.6 Hz, 2H), 7.83-7.77 (m, 2H), 7.76-7.72 (m, 2H), 7.70 (s, 1H), 7.59-7.51 (m, 4H), 7.39-7.30 (m, 5H), 7.28-7.22 (m, 3H), 7.19-7.16 (m, 2H), 6.98-6.96 (m, 1H), 6.95-6.93 (m, 1H). **13C NMR** (151 MHz, CDCl3) δ 151.4, 150.7, 139.7, 136.8, 136.2, 133.7, 133.4, 133.3, 132.4, 132.3, 131.0, 130.6, 130.3, 130.1, 129.7, 128.30 (q, *J* = 6.0 Hz), 128.27, 128.24, 128.19, 127.72, 127.68 (q, *J* = 33.4 Hz), 127.66 (q, *J* = 33.4 Hz), 127.64, 127.4, 127.1, 126.8, 126.1, 125.6, 122.69 (q, *J* = 274.1 Hz), 122.67 (q, *J* = 274.1 Hz). **19F NMR** (564 MHz, CDCl3) δ -58.30 (s), -58.32 (s). **HRMS** (ESI) m/z calculated for C18H13F3N2O3SNa [M+Na]+ 417.1497, found 417.1450.-----------------------------------------------------------------------------------------------------------------------------------------------------------------------------------------------

**(S68')** White solid, m.p. 160-163 oC, yield: 87%. **1H NMR** (600 MHz, CDCl3) δ 11.64 (s, 1H), 8.41-8.36 (m, 1H), 7.90-7.85 (m, 1H), 7.74-7.70 (m, 2H), 7.37 (d, *J* = 8.4 Hz, 2H), 7.13 (d, *J* = 7.8 Hz, 2H), 4.39 (q, *J* = 7.2 Hz, 2H), 2.34 (s, 3H), 1.35 (t, *J* = 7.2 Hz, 3H). **13C NMR** (126 MHz, CDCl3) δ 162.0, 139.84, 139.75, 136.9, 133.4, 133.1, 132.3, 130.8, 128.8, 128.34 (q, *J* = 6.6 Hz), 128.33, 128.0 (q, *J* = 33.3 Hz), 122.7 (q, *J* = 274.3 Hz), 62.6, 21.3, 14.0. **19F NMR** (564 MHz, CDCl3) δ -58.22. **HRMS** (ESI) m/z calculated for C18H17F3N2O4SNa [M+Na]+ 437.1759, found 427.1760.-----------------------------------------------------------------------------------------------------------------------------------------------------------------------------------------------

**(S69')** White solid, m.p. 123-125 oC, yield: 85%. **1H NMR** (600 MHz, CDCl3) δ 11.87 (s, 1H), 8.39-8.37 (m, 1H), 7.91-7.86 (m, 1H), 7.76-7.71 (m, 2H), 7.42 (d, *J* = 8.4 Hz, 2H), 7.29 (d, *J* = 8.4 Hz, 2H), 4.39 (q, *J* = 7.2 Hz, 2H), 1.35 (t, *J* = 7.2 Hz, 3H). **13C NMR** (126 MHz, CDCl3) δ 161.6, 137.9, 136.8, 135.7, 133.6, 133.0, 132.4, 132.2, 129.8, 128.4 (q, *J* = 6.2 Hz), 128.3, 128.0 (q, *J* = 33.0 Hz), 122.7 (q, *J* = 274.7 Hz), 62.8, 13.9. **19F NMR** (470 MHz, CDCl3) δ -58.21. **HRMS** (ESI) m/z calculated for C17H14ClF3N2O4SNa [M+Na]+ 457.0218, found 457.0214.-----------------------------------------------------------------------------------------------------------------------------------------------------------------------------------------------

**(S75')** White solid, m.p. 148-150 oC, yield: 88%. **1H NMR** (600 MHz, CDCl3) δ 11.76 (s, 1H), 8.40-8.38 (m, 1H), 7.89-7.87 (m, 1H), 7.75-7.71 (m, 2H), 7.49-7.45 (m, 2H), 7.37-7.31 (m, 3H), 4.39 (q, *J* = 7.2 Hz, 2H), 1.35 (t, *J* = 7.2 Hz, 3H). **13C NMR** (126 MHz, CDCl3) δ 161.9, 139.5, 136.9, 133.7, 133.5, 133.1, 132.4, 129.5, 128.5, 128.4 (q, *J* = 6.3 Hz), 128.05, 128.02 (q, *J* = 33.1 Hz), 122.7 (q, *J* = 274.7 Hz), 62.6, 13.9. **19F NMR** (470 MHz, CDCl3) δ -58.22. **HRMS** (ESI) m/z calculated for C17H15F3N2O4SNa [M+Na]+ 423.0623, found 423.0622.-----------------------------------------------------------------------------------------------------------------------------------------------------------------------------------------------

1. **Synthetic Applications**

**5.1 Gram-scale experiments**

**Prpcedure:** According to **route E**, to a solution of benzophenone (2.73g, 15 mmol, 1.0 equiv) in methanol (20 mL) was added *o*-trifluoromethylbenzenesulfonyl hydrazide (3.60 g, 15 mmol, 1.0 equiv). The resulting reaction mixture was stirred at 40 oC for 5-8 hours. After the reaction is complete, the solvent was removed in vacuo. Et2O (10 mL) and petroleum ether (10 mL) were added inot the residue to precipitate white solid, which was filtered and washed with ice cold diethyl ether and dried under reduced pressure to give *N*-triftosylhydrazone **S33'**.

To a dry Schlenk reaction tube, TpBr3Ag (150 mg, 10 mol%) and Cs2CO3 (6.65 g, 1.5 equiv) were charged. After sealed the tube was evacuated and backfilled with N2 for three times, followed by addition of DCE (20 mL) solution of NH3·H2O (14 mL, 28%-30% wt%, 0.6 mmol, 8.0 equiv) and DCE (20 mL) solution of *N*-triftosylhydrazone **S33'** (13.6 mmol, 1.0 equiv) via syringe. The reaction mixture was tranfered on to preheated oil bath at 80 oC in the dark for 12 h. When the reaction was completed, the reaction was allowed to cool to room temperature, and filtered through a short pad of basic alumina with EtOAc as an eluent. After the solvent was removed under vacuum, the residue was added the ether solution of HCl and stirred for 1 h at room temperature to precipitate a white solid, which was filtered, washed with cold ether and dried under vacuo to yield hydrochloride of N–H insertion product **33**.

**5.2 Late-stage modification of bioactive and drugs molecules**

**(70)** **(7S,11S,E)-3,7,11,15-tetramethylhexadec-2-en-1-yl (R)-2-amino-2-phenylacetate**

Prepared according to **General Procedure A** using (7S,11S,*E*)-3,7,11,15-tetramethylhexadec-2-en-1-yl 2-diazo-2-phenylacetate S70 (0.3 mmol, 132.2 mg) and NH3·H2O (308 μL, 2.4 mmol) afforded compound **70** (78.6 mg, 61%) as a colourless oil. **1H NMR** (500 MHz, CDCl3) δ 7.39-7.32 (m, 4H), 7.31-7.27 (m, 1H), 5.29-5.24 (m, 1H), 4.66 (dd, *J* = 12.0, 7.0 Hz, 1H), 4.60 (s, 1H), 4.57 (dd, *J* = 12.0, 7.0 Hz, 1H), 1.99-1.91 (m, 2H), 1.85 (s, 2H), 1.62 (s, 3H), 1.57-1.47 (m, 1H), 1.40-1.10 (m, 14H), 1.09-1.00 (m, 4H), 0.88-0.82 (m, 12H) **13C NMR** (126 MHz, CDCl3) δ 174.0, 143.3, 140.4, 128.7, 127.9, 126.8, 117.6, 62.2, 58.8, 39.8, 39.4, 37.4, 37.33, 37.28, 36.6, 32.8, 32.7, 28.0, 25.0, 24.8, 24.5, 22.7, 22.6, 19.74, 19.69, 16.3. **HRMS** (ESI) m/z calcd for C28H47NNaO2 [M+Na]+ 452.3499, Found: 452.3506.

-----------------------------------------------------------------------------------------------------------------------------------------------------------------------------------------------

**(71)** Prepared according to **General Procedure A** using diazo compound S71 (0.3 mmol, 172.5 mg) and NH3·H2O (308 μL, 2.4 mmol) afforded compound **71** (88.0 mg, 52%) as a colourless oil. **1H NMR** (500 MHz, CDCl3) δ 7.55-7.52 (m, 2H), 7.42-7.38 (m, 2H), 7.37-7.32 (m, 1H), 4.93 (s, 1H), 2.60-2.44 (m, 2H), 2.07-1.91 (m, 8H), 1.82-1.72 (m, 2H), 1.59-1.46 (m, 5H), 1.44-1.04 (m, 22H), 0.91-0.82 (m, 12H). **13C NMR** (126 MHz, CDCl3) δ 172.4, 149.4, 140.2, 140.1, 128.7, 128.2, 127.1, 126.7, 124.9, 123.0, 117.3, 75.0, 58.8, 39.3, 37.40, 37.39, 37.3, 32.8, 32.7, 31.1, 27.9, 24.8, 24.4, 22.7, 22.6, 21.0, 20.5, 19.7, 19.6, 11.7. **HRMS** (ESI) m/z calcd for C37H57NNaO3 [M+Na]+ 586.4231, Found: 586.4226.

-----------------------------------------------------------------------------------------------------------------------------------------------------------------------------------------------

**(72)** Prepared according to **General Procedure A** using diazo compound S72 (0.3 mmol, 158.6 mg) and NH3·H2O (308 μL, 2.4 mmol) afforded compound **72** (90.1 mg, 58% yield) as a colourless oil. **1H NMR** (500 MHz, CDCl3) δ 7.36 (d, *J* = 7.0 Hz, 2H), 7.30 (t, *J* = 7.0 Hz, 2H), 7.26-7.23 (m, 1H), 5.98 (ABq, *J* = 11.0 Hz, 2H), 5.06-4.95 (m, 2H), 4.79 (d, *J* = 2.0 Hz, 1H), 4.59 (s, 1H), 2.76-2.69 (m, 1H), 2.47-2.33 (m, 2H), 2.23-2.17 (m, 3H), 2.02-1.92 (m, 3H), 1.91-1.83 (m, 1H), 1.81-1.72 (m, 1H), 1.69-1.59 (m, 2H), 1.55-1.44 (m, 4H), 1.37-1.24 (m, 7H), 1.18-1.08 (m, 3H), 1.05-0.97 (m, 1H), 0.92 (d, *J* = 6.5 Hz, 3H), 0.88-0.85 (m, 6H), 0.52 (s, 3H). **13C NMR** (151 MHz, CDCl3) δ173.3, 144.5, 142.3, 140.1, 133.7, 128.6, 127.8, 126.7, 122.7, 117.5, 112.7, 72.7, 58.7, 56.6, 56.4, 45.9, 41.6, 40.5, 39.5, 36.1, 32.0, 31.8, 29.1, 28.0, 27.7, 23.8, 23.6, 22.8, 22.5, 22.2, 18.8, 11.9. **IR**(Film): 3464, 3003, 2944, 2628, 2253, 1375, 1039, 918 cm-1.

-----------------------------------------------------------------------------------------------------------------------------------------------------------------------------------------------

**(73)** Prepared according to **General Procedure A** using diazo compound S73 (0.3 mmol, 94.3 mg) and NH3·H2O (308 μL, 2.4 mmol) afforded compound **73** (65.6 mg, 72% yield) as a colourless oil. **1H NMR** (500 MHz, CDCl3) δ 7.40-7.31 (m, 4H), 7.31-7.27 (m, 1H), 5.08-5.00 (m, 1H), 4.59 (s, 1H), 4.18-4.09 (m, 2H), 2.00-1.90 (m, 3H), 1.90-1.79 (m, 1H), 1.67 (s, 3H), 1.64-1.54 (m, 4H), 1.42-1.33 (m, 2H), 1.30-1.21 (m, 1H), 1.15-1.06 (m, 1H), 0.85-0.79 (m, 3H). **13C NMR** (126 MHz, CDCl3) δ 174.0, 140.4, 131.23, 131.21, 128.7, 127.9, 126.7, 124.5, 63.8, 58.8, 36.82, 36.79, 35.2, 29.30, 29.28, 25.6, 25.3, 19.2, 19.1, 17.6. **IR** (Film): 3474, 3001, 2943, 2628, 2253, 1753, 1375, 1038, 918 cm-1.

-----------------------------------------------------------------------------------------------------------------------------------------------------------------------------------------------

**(74)** **6,11-dihydrodibenzo[*b*,*e*]oxepin-11-amine**

Prepared according to **General procedure A** using 11-diazo-6,11-dihydrodibenzo[*b*,*e*]oxepine S74 (0.3 mmol, 66.7 mg) and NH3·H2O (308 μL, 2.4 mmol) afforded compound **74** (36.1 mg, 57% yield) as a colourless oil. **1H NMR** (500 MHz, CDCl3) δ 7.36-7.31 (m, 1H), 7.29-7.23 (m, 3H), 7.21-7.15 (m, 2H), 6.99-6.95 (m, 2H), 5.92 (d, *J* = 13.5 Hz, 1H), 5.05-5.00 (m, 2H), 2.04 (s, 2H). **13C NMR** (126 MHz, CDCl3) δ 157.1, 141.8, 135.6, 132.3, 129.8, 129.1, 128.3, 128.2, 128.0, 127.8, 122.5, 120.8, 71.9, 60.4. **HRMS** (ESI) m/z calcd for C14H13NNaO [M+Na]+ 234.0889, Found: 234.0890.

-----------------------------------------------------------------------------------------------------------------------------------------------------------------------------------------------

**(75) ethyl 2-(3-(amino (phenyl) methyl) phenyl) propanoate-methane**

Prepared according to **General Procedure C** using ethyl (*Z*)-2-(3-(phenyl(2-((2-(trifluoromethyl) phenyl) sulfonyl) hydrazineylidene) methyl) phenyl) propanoate S75ꞌ (0.3 mmol, 151.4 mg) and NH3·H2O (308 μL, 2.4 mmol) afforded compound **75** (85.3 mg, 95% yield) as a colourless oil. **1H NMR** (600 MHz, CDCl3) δ 7.36-7.29 (m, 5H), 7.29-7.22 (m, 3H), 7.20 (d, *J* = 7.2 Hz, 1H), 5.31 (s, 1H), 4.16-4.02 (m, 2H), 3.68 (q, *J* = 7.2 Hz, 1H), 3.17 (s, 2H), 1.46 (d, *J* = 7.2 Hz, 3H), 1.16 (td, *J* = 7.2, 1.8 Hz, 3H). **13C NMR** (126 MHz, CDCl3) δ 174.4, 144.23, 144.18, 143.8, 141.02, 140.98, 128.9, 128.6, 127.3, 126.9, 126.40, 126.35, 126.31, 126.2, 125.7, 125.6, 60.7, 59.46, 59.44, 45.50, 45.47, 18.58, 18.50, 14.04. **HRMS** (ESI) m/z calcd for C18H21NNaO2 [M+Na]+ 306.1464, Found: 306.1469.

-----------------------------------------------------------------------------------------------------------------------------------------------------------------------------------------------

**(76) isopropyl 2-(4-(amino (4-chlorophenyl) methyl) phenoxy)-2-methylpropanoate-methane**

Prepared according to **General Procedure C** using isopropyl (*E*)-2-(4-((4-chlorophenyl) (2-((2-(trifluoromethyl) phenyl) sulfonyl)-2l2-diazaneylidene) methyl) phenoxy)-2-methylpropanoate S76ꞌ (0.3 mmol, 174.6 mg) and NH3·H2O (308 μL, 2.4 mmol) afforded compound **76** (95.2 mg, 84% yield) as a colourless oil. **1H NMR** (600 MHz, CDCl3) δ 7.30-7.25 (m, 4H), 7.18 (d, *J* = 9.0 Hz, 2H), 6.81-6.76 (m, 2H), 5.12 (s, 1H), 5.10-5.03 (m, 1H), 1.91 (s, 2H), 1.56 (s, 6H), 1.20 (d, *J* = 6.0 Hz, 6H). **13C NMR** (126 MHz, CDCl3) δ 173.6, 154.6, 144.1, 138.5, 132.5, 128.4, 128.2, 127.4, 118.9, 79.0, 68.8, 58.5, 25.3, 21.5.

-----------------------------------------------------------------------------------------------------------------------------------------------------------------------------------------------

**(77) benzofuran-2-yl (phenyl) methanamine**

Prepared according to **General Procedure C** using *N'*-(benzofuran-2-yl(phenyl) methylene)-2-(trifluoromethyl) benzenesulfonohydrazide S77ꞌ (0.3 mmol, 94.3 mg) and NH3·H2O (308 μL, 2.4 mmol) afforded compound **77** (65.6 mg, 72% yield) as a colourless oil. **1H NMR** (500 MHz, CDCl3) δ 7.43-7.41 (m, 1H), 7.38-7.35 (m, 2H), 7.35-7.32 (m, 1H), 7.31-7.26 (m, 2H), 7.24-7.21 (m, 1H), 7.18-7.08 (m, 2H), 6.43 (s, 1H), 5.21 (s, 1H), 1.89 (s, 2H). **13C NMR** (126 MHz, CDCl3) δ 160.8, 154.9, 142.1, 128.6, 128.3, 127.7, 127.1, 123.8, 122.6, 120.8, 111.1, 102.6, 54.5.

-----------------------------------------------------------------------------------------------------------------------------------------------------------------------------------------------

**(78)** **4-(amino (phenyl) methyl)-*N, N*-diethylbenzamide**

Prepared according to **General Procedure C** using (*Z*)-*N, N*-diethyl-4-(phenyl (2-((2-(trifluoromethyl) phenyl) sulfonyl) hydrazineylidene) methyl) benzamide S78ꞌ (0.3 mmol, 151.1 mg) and NH3·H2O (308 μL, 2.4 mmol) afforded compound **78** (51.7 mg, 61% yield) as a colourless oil. **1H NMR** (500 MHz, CDCl3) δ 7.40 (d, *J* = 8.5 Hz, 2H), 7.36 (d, *J* = 7.0 Hz, 2H), 7.34-7.29 (m, 4H), 7.24 (t, *J* = 7.0 Hz, 1H), 5.22 (s, 1H), 3.59-3.47 (m, 2H), 3.30-3.18 (m, 2H), 1.89 (s, 2H), 1.32-1.16 (m, 3H), 1.16-1.03 (m, 3H). **13C NMR** (151 MHz, CDCl3) δ 171.1, 146.5, 145.1, 135.8, 128.5, 127.1, 126.91, 126.87, 126.5, 59.5, 43.2, 39.2, 14.2, 12.8. **HRMS** (ESI) m/z calcd for C18H22N2NaO [M+Na]+ 305.1624, Found: 305.1616.

-----------------------------------------------------------------------------------------------------------------------------------------------------------------------------------------------

1. **Mechanistic Studies**

**6.1 Control experiments**

**Scheme S1. Competition experiment between NH3·H2O and styrene**

**Experimental Procedures:** The TpBr3Ag (33.0 mg, 0.03 mmol, 10 mol %) was introduced into a Schlenk Sealing pipe. After sealed the tube was evacuated and backfilled with N2 for three times. A mixture of NH3·H2O (308 μL, 28%-30% wt%, 0.6 mmol, 8.0 equiv), Styrene (62.5 mg, 0.6 mmol) and DCE (2 mL) was injected into the Sealing pipe, followed by DCE (2 mL) solution of diphenyldiazomethane (58.3 mg, 0.3 mmol, 1.0 equiv). The resulting mixture was stirred at 60 °C for 12 h in the dark.

**Scheme S2. Control experiments between silver catalyst and aminodiphenylmethane**

**Experimental Procedures:** The Cat.[Ag] (0.03 mmol, 10 mol %) was introduced into a Schlenk Sealing pipe. After sealed the tube was evacuated and backfilled with N2 for three times. A mixture of Aminodiphenylmethane (110 mg, 0.6 mmol), NH3·H2O (308 μL, 28%-30% wt%, 0.6 mmol, 8.0 equiv) and DCE (2 mL) was injected into the Sealing pipe, followed by DCE (2 mL) solution of diphenyldiazomethane (58.3 mg, 0.3 mmol, 1.0 equiv). The resulting mixture was stirred at 60 °C for 12 h in the dark.

**Characterization of silver complex [TpBr3Ag]2(DCE)**


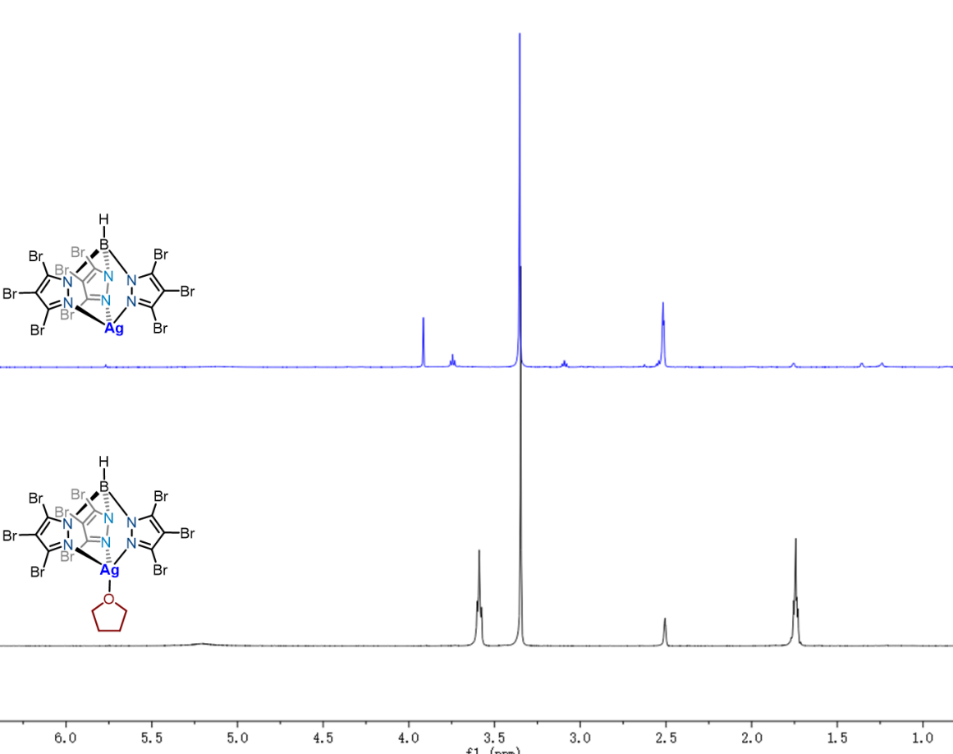


**Fig. S1.** **1H NMR** spectrum Comparison of Catalysts TpBr3Ag(thf) and [TpBr3Ag]2(DCE)

**Table S3.** X-ray Crystal Structure of [TpBr3Ag]2(DCE)(CCDC No. 2166126)

| Empirical formula | C11H5AgBBr9Cl2N6 |
| --- | --- |
| Temperature | 297 K |
| Wavelength | 0.71073 Å |
| Unit cell dimensions | a = 10.797 (2) Å  b = 11.574 (2) Å  c = 11.7947 (19) Å  alpha = 82.136 (15) deg.  beta = 76.706(15) deg.  gamma = 67.752 (19) deg. |
| Volume | 1325.5 (5) Å3 |
| Z | 2 |
| Calculated density | 2.831 Mg/m3 |
| Absorption coefficient | 14.541 mm-1 |
| F(000) | 1028.0 |
| Crystal size | 0.35 x 0.20 x 0.18 mm |
| Theta range for data collection | 2.078 to 24.994 |
| Reflections collected / unique | 8643/4634 [Rint = 0.0383] |
| Data / restraints / parameters | 4634/20/311 |
| Goodness-of-fit on F2 | 1.029 |
| Final R indices [I>2sigma(I)] | R1 = 0.0442, wR2 = 0.0768 |
| Rindices (all data) | R1 = 0.0769, wR2 = 0.0906 |

**Scheme S3.** **[TpBr3Ag]2(DCE)-catalyzed N–H insertion of diphenyldiazomethane.**

**Experimental Procedures**: The [TpBr3Ag]2(DCE) (32.4 mg, 0.03 mmol, 5 mol %) was introduced into a Schlenk Sealing pipe. After sealed the tube was evacuated and backfilled with N2 for three times. A mixture of NH3·H2O (308 μL, 28%-30% wt%, 0.6 mmol, 8.0 equiv) and DCE (2 mL) was injected into the Sealing pipe, followed by DCE (2 mL) solution of diphenyldiazomethane (58.3 mg, 0.3 mmol, 1.0 equiv). The resulting mixture was stirred at 60 °C for 12 h in the dark. When the reaction was completed, the crude reaction mixture was allowed to reach room temperature and concentrated in vacuo and purified by column chromatography on silica gel (petroleum ether/EtOAc) to afford the corresponding N–H insertion product Aminodiphenylmethane (44.5 mg, 81%).

- 1. **Computational studies**

**Theoretical methodology:**

The quantum chemical calculations described in this work were carried out with Gaussian16 package.15 Geometry optimizations and frequency analysis were performed using the B3LYP functional 16,17 and GD3BJ empirical dispersion.18 A mixed basis set of SDD 19,20was used for Ag and Br atoms with 6-31G(d) 21,22 for other atoms. To confirm whether each optimized stationary point is an energy minimum or a saddle point, as well as evaluate the zero-point energy (ZPE) and thermal energy corrections, the vibrational frequencies were computed at the same level of theory. Intrinsic reaction coordinate (IRC) 23,24 calculations were carried out to ascertain the true nature of the transition states. Single-point solvation energies were calculated at the M0625/6-311+G(d,p) level (SDD for Ag and Br) with the SMD (solvation-model density) implicit continuum solvent model (DCE solvent)26 on B3LYP-D3(BJ)-optimized geometries, because it is expected that this strategy will provide greater accuracy for Ag-containing reactions and could give reasonable agreement with higher-level calculations.27 Computed structures were illustrated using CYLview visualization software.28

**Silver catalyzed N**–**H insertion of NH3**

**Fig. S2.** Free energy profiles for the N–H insertion of NH3 in aqueous ammonia system. The bond distances are given in Å and the relative free energies are given in kcal mol-1 calculated at the SMD(DCE)-M06/[6-311+G(d,p)-SDD(Ag/Br)] level.

For N–H insertion of NH3, three molecules of water assisted free-ylide pathway is the most favorable. As depicted in Fig. S2, the 1,2-proton transfer from free-ylide (FY) **Int4-N** (via **TS2-N**, red line) is more favored than that from the silver-ligated ylide (MY) **Int3-N** (via **TS2-N1**,blue line). The RDS activation free energies for these two paths are 3.3 kcal mol-1 and 13.9 kcal mol-1 respectively, indicating a water-assisted free-ylide intermediate mechanism.

**Silver catalyzed N**–**H insertion of primary amine:**

**Fig. S3.** Free energy profiles for the N–H insertion of primary amine **33** in aqueous ammonia system (red and blue) and in DCE (black line). The bond distances are given in Å and the relative free energies are given in kcal mol-1 calculated at the SMD(DCE)-M06/[6-311+G(d,p)-SDD(Ag/Br)] level.

The N–H insertion of primary amine **33** in aqueous ammonia system possesses the same mechanism with N–H insertion of NH3. The RDS activation free energies for three water-assisted 1,2-proton transfer process from free-ylide **Int4- N'** (via **TS2-N'**, red line)and from silver-ligated ylide **Int3-N'** (via **TS2-N''**, blue line) are 12.0 and 15.1 kcal mol-1, respectively, which are much higher than that of N–H insertion of NH3 (3.3 kcal mol-1 for RDS activation free energy). These results are in agreement with the experimental observations that no over N–H insertion product **33'** was observed. Interestingly, the reaction of primary amine **33** with diphenyldiazomethane in the absence of aqueous ammonia gave N–H insertion product **33'** in 60% yield. We suspected that the 1,2-proton transfer process may be assisted by primary amine **33**. In fact, the activation free energy is 23.4 kcal mol-1 (**TS2-N'''**, black line), indicating this process can occur smoothly under the current reaction conditions (60 ℃).

**Silver catalyzed O**–**H insertion of H2O**

**Fig. S4.** Free energy profiles for the O–H insertion of H2O in aqueous ammonia system. The bond distances are given in Å and the relative free energies are given in kcal mol-1 calculated at the SMD(DCE)-M06/[6-311+G(d,p)-SDD(Ag/Br)] level.

Differently from the N–H insertion, two molecules water-assisted 1,2-proton shift from silver-ligated ylide **Int3-O** (6.8 kcal mol-1, via **TS2-O**, blue line) is more favored than that from the free-ylide **Int4-O** (15.2 kcal mol-1 via **TS2-O'**, red line), which may be ascribed to the considerable C-Ag bond strength in **Int3-O**.

**The origin for divergent silver-ligated** **ylide formation**

**Fig. S5.** NPA charge analysis for the origin to form the different silver-ligated ylide species: The values in e represent the NPA charge of certain atoms.

To probe the origin of divergent ylide species formation, we have carried out NPA charge analysis for corresponding monomers as well as key transition states. Results show that the charge on N in **MO-N** is -1.109 e whereas the charges on Oin **MO-O** and N in **MO-N'** are -0.931 e and -0.881 e respectively, confirming the order of nucleophilicity follows the trend **MO-N > MO-O > MO-N'**. Similarly, the charges in key transition states can also lead to the order of nucleophilicity as **TS1-N > TS1-O > TS1-N'**. These results are consistent with the ylide formation activation free energies of 2.7, 7.4 and 7.9 kcal mol-1.

**Fig. S6.** NCI analysis for the key intermediates **Int3-N** and **Int3-N'** in N–H insertion of NH3 and primary amine **33**.

The reaction pathway for the N–H insertion of diphenylmethylamine **33** encounters a higher energy barrier to the cleavage of the Ag–C bond in ylide **Int3-N'** (9.3 vs 2.1 kcal mol-1). To explore the origin of this phenomenon, we have performed NCI analysis of **Int3-N** and **Int3-N'** using Multiwfn.29 There is a stronger Br…π weak interaction between phenyl and bulky TpBr3 ligand in **Int3-N'**, which renders the silver catalyst part and ylide part binds more tightly and a higher dissociation energy is needed for **Int3-N'** to break the Ag−C bond in ylide **Int3-N'**. This Br…π weak interaction is absent from **Int3-N**, which results in the highest RDS activation free energy (3.3 kcal mol-1) for N–H insertion of NH3 is much lower than that of N–H insertion of diphenylmethylamine **33** (12.0 kcal mol-1).

**Cartesian coordinates of the SMD//M06/[6-311+G(d,p)-SDD(Ag/Br)] computed structures**

**TpBr3Ag**

Zero-point correction= 0.105113 (Hartree/Particle)

Thermal correction to Energy= 0.134242

Thermal correction to Enthalpy= 0.135187

Thermal correction to Gibbs Free Energy= 0.034569

Sum of electronic and zero-point Energies= -963.703966

Sum of electronic and thermal Energies= -963.674837

Sum of electronic and thermal Enthalpies= -963.673893

Sum of electronic and thermal Free Energies= -963.774510

Ag 0.00371600 0.00001600 -2.38941000

N 1.78116000 -0.33558100 -0.93559200

N 1.45241900 -0.26653500 0.39099900

N -0.59948100 1.70852700 -0.93791100

N -0.49616100 1.39037700 0.38916500

N -1.17780000 -1.37531000 -0.93826900

N -0.95626700 -1.12498200 0.38886000

B -0.00006900 -0.00023000 0.87287300

C 3.08181600 -0.57036000 -1.00567700

C 3.64910400 -0.66398400 0.27358700

C 2.57316200 -0.46390100 1.12922200

C -1.04670900 2.95235900 -1.00935700

C -1.25129300 3.49103100 0.26925000

C -0.88742300 2.45974600 1.12600000

C -2.03278500 -2.38325900 -1.00940700

C -2.40083600 -2.82684400 0.26920600

C -1.69033800 -1.99558300 1.12596800

H 0.00035300 0.00023000 2.05234200

Br 2.60924000 -0.45653900 3.03009000

Br 5.46535700 -0.98829500 0.73203300

Br 3.93311900 -0.73454000 -2.70194700

Br -1.70610200 -2.03025100 3.02678700

Br -3.59140700 -4.23671900 0.72638600

Br -2.59754100 -3.03916600 -2.70640000

Br -0.91249800 2.48819000 3.02682600

Br -1.87702800 5.22695700 0.72600800

Br -1.32799500 3.77120600 -2.70629500

**Int0**

Zero-point correction= 0.298547 (Hartree/Particle)

Thermal correction to Energy= 0.339813

Thermal correction to Enthalpy= 0.340757

Thermal correction to Gibbs Free Energy= 0.214590

Sum of electronic and zero-point Energies= -1574.086687

Sum of electronic and thermal Energies= -1574.045421

Sum of electronic and thermal Enthalpies= -1574.044477

Sum of electronic and thermal Free Energies= -1574.170644

Ag 1.31497900 0.13324100 -0.64430700

N -0.61683400 -0.91667800 -1.59711300

N -1.68411700 -1.02749600 -0.74965000

N 0.40047600 -0.81950900 1.35952400

N -0.90706000 -0.49783800 1.60261800

N -0.28996000 1.80882900 -0.20094500

N -1.56785200 1.38340000 0.03499400

B -1.86334000 -0.07399400 0.45955300

C -0.74296400 -1.88252200 -2.49504000

C -1.89064400 -2.65437900 -2.26352500

C -2.45575200 -2.07037800 -1.13671600

C 0.94000100 -1.12858900 2.53067200

C 0.00534500 -1.01738100 3.57078200

C -1.15657200 -0.61042000 2.92826800

C -0.36879200 3.07903700 -0.56980600

C -1.69947300 3.52377800 -0.58173400

C -2.42587200 2.40634100 -0.19152000

H -2.97978900 -0.14591700 0.84369200

Br -4.04058700 -2.60359900 -0.23064600

Br -2.53480700 -4.14077600 -3.26086400

Br 0.54872500 -2.07543000 -3.88602300

Br -4.31250900 2.26641900 0.00707800

Br -2.35770700 5.25489300 -1.01667100

Br 1.21339400 4.04368200 -1.00261000

Br -2.84767500 -0.24568200 3.71871800

Br 0.25980200 -1.35859500 5.42519900

Br 2.76710500 -1.65590500 2.63929400

N 3.32028500 0.09744500 -3.80046700

N 3.46219000 0.12044500 -2.67406600

C 3.60993800 0.13214400 -1.34139800

C 4.11827000 -1.17177500 -0.78997800

C 3.47072200 -2.37774100 -1.09932600

C 5.24871600 -1.19468200 0.03664000

C 3.94143300 -3.58273900 -0.58469200

H 2.58772800 -2.37031900 -1.73134100

C 5.70623700 -2.40314200 0.56283000

H 5.76168100 -0.27026900 0.27644500

C 5.05655800 -3.60007000 0.25579300

H 3.42387000 -4.50585100 -0.82744800

H 6.58088000 -2.40685900 1.20699200

H 5.41527700 -4.53803200 0.66851700

C 4.00806000 1.45744700 -0.76912500

C 4.48496400 2.50111800 -1.57205100

C 3.89321200 1.66211700 0.61716500

C 4.82474400 3.72972100 -1.00415300

H 4.59114000 2.36347200 -2.64419000

C 4.24471400 2.88551900 1.17920700

H 3.52807300 0.85987000 1.25004600

C 4.70760100 3.92774200 0.37191200

H 5.19205700 4.52841500 -1.64199500

H 4.14385800 3.02714100 2.25101800

H 4.97442500 4.88365700 0.81181600

**TS1**

Zero-point correction= 0.296815 (Hartree/Particle)

Thermal correction to Energy= 0.338536

Thermal correction to Enthalpy= 0.339481

Thermal correction to Gibbs Free Energy= 0.213462

Sum of electronic and zero-point Energies= -1574.070196

Sum of electronic and thermal Energies= -1574.028475

Sum of electronic and thermal Enthalpies= -1574.027530

Sum of electronic and thermal Free Energies= -1574.153549

Ag -0.74065300 0.84329700 -0.92179200

N 1.39460800 1.42369000 -0.53124200

N 2.07378200 0.87549900 0.52161100

N -0.49021700 0.82094900 1.70426500

N 0.28578900 -0.29303600 1.87746200

N 0.22871800 -1.46896600 -0.71825200

N 1.39783700 -1.49758200 -0.01045100

B 1.63220200 -0.47887400 1.13138700

C 2.01118500 2.55573800 -0.84243900

C 3.11383300 2.77943600 -0.00731100

C 3.11017500 1.68147600 0.84535700

C -1.61148000 0.59560300 2.37968000

C -1.60556300 -0.66867900 2.99211100

C -0.36965800 -1.19663600 2.63815300

C 0.33971400 -2.39207700 -1.66221400

C 1.57807100 -3.05218100 -1.59556200

C 2.21809500 -2.44072000 -0.52542800

H 2.47522600 -0.88074000 1.86526000

Br 4.33777300 1.31154600 2.24706200

Br 4.33813000 4.23402600 -0.03873300

Br 1.36384800 3.64722900 -2.26530200

Br 3.95490900 -2.79978000 0.16132500

Br 2.22697200 -4.46535700 -2.69316100

Br -1.07799800 -2.68381000 -2.90744600

Br 0.35472700 -2.90349600 3.05965000

Br -2.97222900 -1.49130200 4.03115400

Br -3.01442600 1.88822300 2.37773100

N -2.07717600 1.08886600 -4.31086000

N -2.54821500 0.92579800 -3.31514300

C -2.80437100 0.88122900 -1.58564600

C -3.52566000 2.15393900 -1.31851800

C -2.82925300 3.37607200 -1.38739300

C -4.86373400 2.16078100 -0.88947500

C -3.45319800 4.56971400 -1.04796300

H -1.78581400 3.37276300 -1.69155700

C -5.48046200 3.35626800 -0.52354300

H -5.40653200 1.22631000 -0.81118900

C -4.78109300 4.56131200 -0.60610400

H -2.90112500 5.50299400 -1.10264300

H -6.50847800 3.34563500 -0.17373300

H -5.26393000 5.49120400 -0.32013400

C -3.54935400 -0.39761100 -1.40081900

C -4.57277500 -0.82469100 -2.26091200

C -3.22918900 -1.18741900 -0.28681300

C -5.23819700 -2.02742800 -2.02858100

H -4.84149400 -0.21622700 -3.12074500

C -3.92475900 -2.36684500 -0.03051300

H -2.42650500 -0.88629400 0.37355000

C -4.92157800 -2.79779800 -0.90715000

H -6.01152500 -2.35600700 -2.71674700

H -3.66448300 -2.95788700 0.84210400

H -5.44573400 -3.73053700 -0.72190700

**Int1**

Zero-point correction= 0.296630 (Hartree/Particle)

Thermal correction to Energy= 0.339850

Thermal correction to Enthalpy= 0.340794

Thermal correction to Gibbs Free Energy= 0.208952

Sum of electronic and zero-point Energies= -1574.108439

Sum of electronic and thermal Energies= -1574.065219

Sum of electronic and thermal Enthalpies= -1574.064275

Sum of electronic and thermal Free Energies= -1574.196117

Ag -0.70437300 1.14747800 -0.68599400

N 1.40677500 1.32078700 -0.02869900

N 1.93907000 0.51001500 0.93704800

N -0.72311800 0.47262400 1.89030400

N -0.05631900 -0.72118300 1.90254800

N -0.06673600 -1.50703600 -0.79042000

N 1.11751800 -1.61888000 -0.11698800

B 1.32823600 -0.88522300 1.23083900

C 2.18506500 2.39432300 -0.10513600

C 3.25039400 2.31253400 0.80038800

C 3.04868400 1.09528700 1.44054100

C -1.92317000 0.22801800 2.39866300

C -2.07850700 -1.12456200 2.74477200

C -0.85479800 -1.68905100 2.40519600

C 0.09807900 -2.15950000 -1.93311100

C 1.38755800 -2.70841400 -2.03962700

C 2.00172900 -2.32820000 -0.85378100

H 2.07057600 -1.50499700 1.92253700

Br 4.12382200 0.32663700 2.80400800

Br 4.65198400 3.56583100 1.08204900

Br 1.78413600 3.80273500 -1.32224500

Br 3.78981800 -2.64914700 -0.29287400

Br 2.13618700 -3.71176700 -3.47268400

Br -1.31172200 -2.24240600 -3.21986000

Br -0.31209400 -3.50656200 2.53881400

Br -3.60246000 -1.99559500 3.48289100

Br -3.22352800 1.62259600 2.51350400

N 2.24290200 0.27340200 -3.01664400

N 1.30253100 0.67730500 -3.43341500

C -2.68607700 1.42027900 -1.30311000

C -3.14183600 2.76924600 -1.54552900

C -2.27515400 3.68649500 -2.19040100

C -4.39854300 3.24224100 -1.08778000

C -2.67519600 4.99269700 -2.43303900

H -1.29809100 3.33590000 -2.50735800

C -4.76739300 4.56887200 -1.27881200

H -5.04392900 2.57242700 -0.53088700

C -3.91750000 5.43988000 -1.96693600

H -2.01270100 5.67491800 -2.95688400

H -5.71644900 4.92774300 -0.89209300

H -4.21344200 6.47323800 -2.12292100

C -3.63879900 0.34781100 -1.28519500

C -4.87650900 0.40103700 -1.98553800

C -3.32788200 -0.83744900 -0.56860300

C -5.76586700 -0.66173000 -1.93036000

H -5.10120500 1.26381900 -2.60221600

C -4.24634200 -1.87183400 -0.46897700

H -2.35919400 -0.92346700 -0.09525300

C -5.46366900 -1.78772200 -1.15263200

H -6.69635800 -0.62136400 -2.48840000

H -4.00398100 -2.75403900 0.11412000

H -6.16985300 -2.61161400 -1.10133800

**Int1-N**

Zero-point correction= 0.325343 (Hartree/Particle)

Thermal correction to Energy= 0.369204

Thermal correction to Enthalpy= 0.370148

Thermal correction to Gibbs Free Energy= 0.237598

Sum of electronic and zero-point Energies= -1521.136130

Sum of electronic and thermal Energies= -1521.092269

Sum of electronic and thermal Enthalpies= -1521.091325

Sum of electronic and thermal Free Energies= -1521.223875

Ag 0.43744200 1.24614900 -0.62516800

N -1.69292900 0.64546700 -0.64569600

N -2.10783300 -0.63954100 -0.42727000

N 0.28738600 -1.29592100 -1.72652700

N -0.04045500 -2.06428900 -0.64312400

N 0.74404100 -0.55943000 1.56003300

N -0.56984300 -0.93716800 1.53523800

B -1.18696100 -1.65246100 0.30092000

C -2.68429400 1.27209700 -1.27429000

C -3.77296200 0.41393200 -1.47523500

C -3.35519700 -0.79084500 -0.92070700

C 1.37643500 -1.84387300 -2.24571900

C 1.79926300 -2.96584100 -1.51061800

C 0.85772000 -3.06318000 -0.49477300

C 0.92210600 0.05510000 2.72207700

C -0.26470700 0.10610000 3.47696700

C -1.18908400 -0.54324900 2.66994000

H -1.82795700 -2.59485400 0.64625800

Br -4.33427900 -2.41404500 -0.82586100

Br -5.44167800 0.80585100 -2.29783400

Br -2.50790300 3.09347400 -1.79600500

Br -3.04527900 -0.82774400 2.97808500

Br -0.55589000 0.88266100 5.19230700

Br 2.62572200 0.77685300 3.20167600

Br 0.77866500 -4.32004900 0.92917900

Br 3.31098300 -4.08513600 -1.81436700

Br 2.21351300 -1.06932900 -3.77794300

C 2.29311700 2.21579600 -0.61716800

C 2.33491800 3.60762900 -0.99426000

C 1.25159400 4.44863100 -0.62895100

C 3.39019700 4.15407500 -1.76925700

C 1.26473100 5.79336100 -0.97592200

H 0.44166800 4.02916000 -0.03356800

C 3.35747300 5.48559300 -2.16623800

H 4.19520100 3.50660600 -2.10004100

C 2.30562400 6.31094100 -1.75614700

H 0.44984100 6.43846200 -0.66066100

H 4.15038200 5.88439700 -2.79191800

H 2.28991100 7.35476700 -2.05682600

C 3.50601800 1.52831700 -0.27923200

C 4.66861600 2.20047800 0.18899100

C 3.52645900 0.11054200 -0.31968200

C 5.79537900 1.48316100 0.56399600

H 4.64976700 3.27832900 0.30174600

C 4.67091400 -0.60001000 0.00777000

H 2.62531200 -0.41060800 -0.60983400

C 5.80488400 0.08596600 0.45573200

H 6.66892200 2.00344800 0.94513300

H 4.67078200 -1.68323600 -0.05534500

H 6.69235000 -0.46966500 0.74545900

N -0.90526600 3.05132100 1.65286900

H -0.32020700 2.52873800 2.30313500

H -1.61331900 2.39230300 1.33287200

H -1.39343100 3.75527800 2.20625400

**TS1-N**

Zero-point correction= 0.325067 (Hartree/Particle)

Thermal correction to Energy= 0.368277

Thermal correction to Enthalpy= 0.369221

Thermal correction to Gibbs Free Energy= 0.238768

Sum of electronic and zero-point Energies= -1521.133246

Sum of electronic and thermal Energies= -1521.090036

Sum of electronic and thermal Enthalpies= -1521.089092

Sum of electronic and thermal Free Energies= -1521.219546

Ag 0.70856200 1.18637000 0.43361900

N -1.47872900 1.23306100 0.05537300

N -2.03937900 0.40295400 -0.87784500

N 0.56318900 0.31192800 -1.98443300

N -0.10686900 -0.87768200 -1.91090500

N 0.12607100 -1.54914000 0.80177300

N -1.12291000 -1.63192100 0.24996700

B -1.43423000 -1.00442200 -1.13273300

C -2.28558700 2.28185300 0.17283900

C -3.39342600 2.16710200 -0.67612400

C -3.18994300 0.95292700 -1.32310500

C 1.72908300 0.04343000 -2.55899900

C 1.85753100 -1.32208600 -2.86079400

C 0.65578100 -1.86712400 -2.42472500

C 0.01504200 -2.06068400 2.02047600

C -1.29850100 -2.47464900 2.30257100

C -1.98781200 -2.17402800 1.13670800

H -2.21992600 -1.67300000 -1.72514200

Br -4.30999700 0.14198300 -2.62311600

Br -4.84601200 3.37572500 -0.88474600

Br -1.87502400 3.69250600 1.38695400

Br -3.84026900 -2.40042300 0.76436700

Br -1.98008500 -3.27100400 3.89186900

Br 1.53231100 -2.19023900 3.18033800

Br 0.10037000 -3.68446600 -2.45899900

Br 3.33464400 -2.22926800 -3.64796700

Br 3.01910900 1.42664000 -2.81359900

C 2.67925900 1.55854900 1.02047000

C 3.19161900 2.90229700 1.09566300

C 2.29931700 3.97767100 1.33090500

C 4.55698500 3.20674000 0.85732500

C 2.75675000 5.28443200 1.39028400

H 1.25091100 3.74921700 1.48627800

C 5.00391100 4.52261000 0.87441800

H 5.24267600 2.40493000 0.60937200

C 4.10998700 5.55990500 1.15584400

H 2.06411800 6.09471400 1.59598200

H 6.04571000 4.74439800 0.66375400

H 4.46294400 6.58716500 1.17340000

C 3.57589000 0.45488100 1.24816500

C 4.60358900 0.50378100 2.22503800

C 3.41141700 -0.73732400 0.50152500

C 5.43546900 -0.59072400 2.42544500

H 4.68971200 1.38277800 2.85401100

C 4.29732500 -1.79479800 0.65097400

H 2.59290100 -0.80983900 -0.20206800

C 5.30315400 -1.72883400 1.62071600

H 6.19599600 -0.55825400 3.19992400

H 4.17917600 -2.68519800 0.04171500

H 5.97095300 -2.57321100 1.76577300

N 1.30702600 1.59100400 3.83607700

H 1.45601400 0.61613300 3.57916100

H 0.49608900 1.88955700 3.29525300

H 1.01500200 1.58543900 4.81387600

**Int2-N**

Zero-point correction= 0.332241 (Hartree/Particle)

Thermal correction to Energy= 0.373996

Thermal correction to Enthalpy= 0.374940

Thermal correction to Gibbs Free Energy= 0.249565

Sum of electronic and zero-point Energies= -1521.161350

Sum of electronic and thermal Energies= -1521.119595

Sum of electronic and thermal Enthalpies= -1521.118650

Sum of electronic and thermal Free Energies= -1521.244025

Ag 0.46188900 1.20952200 0.70359300

N -1.56263300 1.08125400 -0.13113400

N -1.93400500 0.09083600 -0.99712400

N 0.80037200 0.12307200 -1.71956800

N 0.19882100 -1.10438800 -1.63736700

N 0.21615400 -1.74363400 1.08183300

N -1.01065000 -1.70960000 0.48640300

B -1.19125800 -1.26923400 -0.99908700

C -2.40249900 2.09490800 -0.31249900

C -3.34899900 1.79059700 -1.29973300

C -3.00730300 0.50536400 -1.70498100

C 1.99275000 -0.08867700 -2.25664800

C 2.20908100 -1.45077000 -2.52927000

C 1.03353100 -2.05747800 -2.11047700

C -0.00630000 -2.12113700 2.33102800

C -1.36802100 -2.33355900 2.59579600

C -1.96969500 -2.05643800 1.37468100

H -1.84304900 -2.07460900 -1.58625100

Br -3.87436600 -0.55541200 -3.01874200

Br -4.78025500 2.87332000 -1.92753600

Br -2.20596200 3.70097200 0.68958800

Br -3.81703200 -2.10381600 0.92813200

Br -2.20051600 -2.87813100 4.21885300

Br 1.46283300 -2.33121300 3.55861600

Br 0.58896000 -3.90694500 -2.12379000

Br 3.74033800 -2.27802900 -3.30094700

Br 3.18823300 1.36315300 -2.57788900

C 2.30117900 1.68004100 1.73822600

C 2.37848200 3.17507500 1.80955300

C 2.27640900 3.92101100 2.99314200

C 2.52678300 3.88627000 0.59976300

C 2.29913600 5.32092200 2.97171900

H 2.16305900 3.43912500 3.96159200

C 2.56043600 5.27332800 0.58081500

H 2.60247700 3.32773100 -0.32827000

C 2.44159400 6.00501800 1.76989600

H 2.20816800 5.86823200 3.90586800

H 2.67012300 5.79075000 -0.36809000

H 2.45783100 7.09039400 1.75229400

C 3.51091900 0.98589000 1.14653300

C 4.75898900 1.62135600 1.05502700

C 3.41007600 -0.35365300 0.73195100

C 5.86737600 0.94383800 0.54491800

H 4.85811100 2.65765700 1.36124700

C 4.52159100 -1.03521100 0.24140000

H 2.44573100 -0.85243100 0.75782600

C 5.75364300 -0.38619400 0.13871800

H 6.82138100 1.45803300 0.46685700

H 4.41543800 -2.06372500 -0.08888900

H 6.61497300 -0.91090300 -0.26429700

N 2.19555800 1.11902100 3.16890300

H 2.12815400 0.09477800 3.12713600

H 1.35147900 1.46133300 3.63538800

H 3.01516000 1.35687200 3.75322900

**Int3-N**

Zero-point correction= 0.408236 (Hartree/Particle)

Thermal correction to Energy= 0.456516

Thermal correction to Enthalpy= 0.457460

Thermal correction to Gibbs Free Energy= 0.318822

Sum of electronic and zero-point Energies= -1750.394193

Sum of electronic and thermal Energies= -1750.345913

Sum of electronic and thermal Enthalpies= -1750.344969

Sum of electronic and thermal Free Energies= -1750.483607

Ag -0.57936500 0.78348600 -1.14021300

N 1.44068500 1.27342500 -0.20531000

N 1.67217500 0.79892000 1.06223600

N -1.01136200 0.68807500 1.93501600

N -0.38612700 -0.51769500 1.74734700

N 0.52578500 -1.59601800 -0.76306700

N 1.39551900 -1.55779600 0.28500100

B 1.13531400 -0.59985700 1.46953600

C 2.30309600 2.26660600 -0.39463000

C 3.09459600 2.48745000 0.73998600

C 2.65557700 1.52457600 1.63960500

C -2.22234400 0.39730600 2.39863200

C -2.42587500 -0.98697300 2.51510200

C -1.21746700 -1.52626000 2.10010800

C 1.08742700 -2.35539900 -1.68625900

C 2.34174600 -2.83777200 -1.27527000

C 2.49552400 -2.29141800 -0.00679200

H 1.72341100 -0.98075400 2.43149600

Br 3.28630000 1.22942900 3.40411100

Br 4.46540300 3.78053200 0.98624500

Br 2.48046300 3.14132900 -2.08094200

Br 3.97969500 -2.46139300 1.16993500

Br 3.54542400 -3.97149000 -2.21699900

Br 0.19335600 -2.67360200 -3.35363200

Br -0.70971500 -3.35886600 2.06036300

Br -3.98325000 -1.91217700 3.08846500

Br -3.44508200 1.77748200 2.90662300

C -2.53682600 0.52451700 -2.11524100

C -3.33245600 1.78005500 -1.93321300

C -3.44091600 2.80073000 -2.88941200

C -4.00447100 1.96423300 -0.70535500

C -4.15797500 3.97028600 -2.61855300

H -2.93848300 2.72762100 -3.84806200

C -4.71781900 3.12704600 -0.43806200

H -3.96412800 1.17367800 0.03580700

C -4.79515400 4.14693400 -1.39493700

H -4.20294100 4.74849000 -3.37487800

H -5.22006100 3.23415500 0.51936000

H -5.34664100 5.05815600 -1.18533800

C -3.33174700 -0.71509000 -1.72775500

C -4.66811800 -0.83953300 -2.15000700

C -2.76981000 -1.76207300 -0.99014600

C -5.41504500 -1.97535600 -1.84568100

H -5.13514200 -0.02294500 -2.69579800

C -3.51754000 -2.89985200 -0.67706100

H -1.74187200 -1.68393900 -0.66104300

C -4.83983300 -3.01106800 -1.10422200

H -6.44742800 -2.04864100 -2.17661400

H -3.06264100 -3.69231900 -0.09085400

H -5.42194700 -3.89434200 -0.85710900

N -2.19153400 0.35995000 -3.59842100

H -1.72295100 -0.54300700 -3.71273900

H -1.51166900 1.11477000 -3.89114900

H -3.02129500 0.37036500 -4.21107900

O -0.75831600 4.15586600 -2.11084800

H -2.25049000 3.14093100 0.37889000

H 0.06219700 4.65234200 -1.96896600

O -0.36789100 2.32937800 -4.05443300

H 0.50947200 1.97838700 -3.83391500

H -0.54136300 3.00830900 -3.33736700

O -1.29384800 3.30918100 0.45905500

H -0.95777200 2.53931500 0.96323000

H -0.95849600 3.77023400 -1.22227300

**Int4-N**

Zero-point correction= 0.299065 (Hartree/Particle)

Thermal correction to Energy= 0.317425

Thermal correction to Enthalpy= 0.318369

Thermal correction to Gibbs Free Energy= 0.252677

Sum of electronic and zero-point Energies= -786.634167

Sum of electronic and thermal Energies= -786.615807

Sum of electronic and thermal Enthalpies= -786.614863

Sum of electronic and thermal Free Energies= -786.680555

C 0.15500600 0.27115800 -0.21010400

C -0.77316300 -0.85307200 -0.05379900

C -1.75994600 -1.21270200 -0.99780400

C -0.72832600 -1.61736500 1.13652300

C -2.66071700 -2.25462400 -0.75516000

H -1.82740300 -0.69795200 -1.95302200

C -1.61197300 -2.66164200 1.36636500

H 0.01530700 -1.36396500 1.88692600

C -2.59704900 -2.98797000 0.42523500

H -3.40649500 -2.49669600 -1.50847600

H -1.54447800 -3.22112400 2.29602500

H -3.29666600 -3.79648300 0.61425100

C 1.62200100 0.02968700 -0.13179400

C 2.18973700 -1.25839500 -0.13715700

C 2.50841900 1.12660800 -0.06399000

C 3.57043000 -1.44020700 -0.07626400

H 1.53649600 -2.12309700 -0.19215700

C 3.88830200 0.94472900 -0.02933500

H 2.10044200 2.13263200 0.01332500

C 4.43079900 -0.34229000 -0.03215400

H 3.97683200 -2.44860300 -0.08120600

H 4.54271600 1.81126400 0.02358100

H 5.50670600 -0.48634300 0.00842700

N -0.15475300 1.06961700 -1.45679300

H 0.44048600 1.89922700 -1.46898700

H -1.16892900 1.39714000 -1.43205500

H 0.01362900 0.56508900 -2.34327500

O -2.70522300 3.22583900 1.00708800

H -0.09779500 1.57888000 0.82581200

H -2.68219000 4.17403000 0.80921100

O -2.76822100 1.76696200 -1.22713200

H -3.11129900 0.91431800 -0.91047400

H -2.83282500 2.36469100 -0.42557100

O -0.14667300 2.55496300 1.22711400

H 0.23316500 2.47100300 2.11540700

H -1.75461800 2.99308400 1.21987500

**TS2-N**

Zero-point correction= 0.295965 (Hartree/Particle)

Thermal correction to Energy= 0.313835

Thermal correction to Enthalpy= 0.314779

Thermal correction to Gibbs Free Energy= 0.250015

Sum of electronic and zero-point Energies= -786.632574

Sum of electronic and thermal Energies= -786.614705

Sum of electronic and thermal Enthalpies= -786.613760

Sum of electronic and thermal Free Energies= -786.678525

C 0.13884000 0.33942000 -0.12067200

C -0.76460000 -0.82676500 0.00890900

C -1.65734400 -1.26487200 -0.98702400

C -0.75474500 -1.54333700 1.22388000

C -2.51656800 -2.34679800 -0.76995700

H -1.68663700 -0.77625300 -1.95764500

C -1.59509600 -2.62917300 1.43263600

H -0.07336200 -1.22526100 2.00808100

C -2.49256300 -3.03623800 0.43877000

H -3.19595800 -2.65427900 -1.56087600

H -1.56221300 -3.15579400 2.38280700

H -3.15885600 -3.87677700 0.60820000

C 1.61571100 0.06873400 -0.08834800

C 2.15649400 -1.21561500 -0.26508600

C 2.51012900 1.14001200 0.10339700

C 3.53586500 -1.42269900 -0.25003300

H 1.48691800 -2.05765700 -0.40942600

C 3.88784200 0.93543100 0.09925300

H 2.10531400 2.13183100 0.29061200

C 4.40898800 -0.34860000 -0.07575600

H 3.92911900 -2.42700100 -0.38542600

H 4.55735800 1.77814000 0.25157400

H 5.48328800 -0.51028600 -0.06841900

N -0.17462300 1.14338000 -1.37247400

H 0.31364800 2.03847700 -1.28804000

H -1.22089700 1.36559600 -1.40514800

H 0.11861900 0.70060100 -2.25352100

O -2.74537300 3.13966200 0.91365500

H -0.10891300 1.47391600 0.74958700

H -2.78728400 4.08478500 0.70460400

O -2.82660500 1.65918500 -1.27426000

H -3.16591100 0.81024600 -0.94583300

H -2.89290000 2.27056100 -0.47568500

O -0.19684100 2.61677600 1.08387600

H 0.15440200 2.63975000 1.98757900

H -1.76053200 2.96376500 1.08831100

**TS2-N1**

Zero-point correction= 0.406702 (Hartree/Particle)

Thermal correction to Energy= 0.455410

Thermal correction to Enthalpy= 0.456354

Thermal correction to Gibbs Free Energy= 0.313389

Sum of electronic and zero-point Energies= -1750.368154

Sum of electronic and thermal Energies= -1750.319445

Sum of electronic and thermal Enthalpies= -1750.318501

Sum of electronic and thermal Free Energies= -1750.461467

Ag -0.64711900 0.71504900 -1.04741400

N 1.57426700 1.74259100 -0.53747500

N 1.96615000 1.19245900 0.65268500

N -0.50215000 0.21414400 1.57266900

N 0.55762700 -0.65193500 1.61695200

N 0.87566900 -1.12031700 -1.28103100

N 1.95836200 -1.08087900 -0.44631700

B 1.89316600 -0.33185300 0.90562800

C 1.71734400 3.05392900 -0.39540400

C 2.18646500 3.39869200 0.87978400

C 2.32428500 2.16927900 1.51349700

C -1.43615800 -0.32015900 2.34861100

C -1.02309400 -1.53668800 2.91510400

C 0.25670400 -1.70735500 2.40764500

C 1.26401500 -1.78360800 -2.36056300

C 2.59882800 -2.19907600 -2.26707800

C 2.99907200 -1.72212000 -1.02494000

H 2.80516600 -0.67638700 1.58580900

Br 2.88333600 1.82233300 3.29542600

Br 2.56614200 5.12589800 1.58036500

Br 1.36264100 4.23401500 -1.86158800

Br 4.70767400 -1.90991300 -0.21639100

Br 3.61835000 -3.19539800 -3.52589400

Br 0.06711900 -2.08205300 -3.82370100

Br 1.44710000 -3.16810400 2.66523000

Br -1.97369600 -2.67791800 4.09969500

Br -3.11325900 0.55685600 2.61179800

C -3.53183600 -0.26376800 -1.41329300

C -4.71300200 0.59634600 -1.56736900

C -5.03964200 1.23689800 -2.78443400

C -5.52374200 0.91523700 -0.44817500

C -6.10864900 2.13041500 -2.87730800

H -4.43929600 1.08159300 -3.67651500

C -6.58791500 1.80003400 -0.54895000

H -5.29453000 0.46372100 0.51074400

C -6.89606000 2.41864400 -1.76650800

H -6.31784700 2.60515100 -3.83235000

H -7.18479300 2.01278200 0.33440200

H -7.72632800 3.11406500 -1.84026700

C -3.60414900 -1.50870600 -0.58744300

C -4.81434600 -2.09630300 -0.17498300

C -2.41407700 -2.18938000 -0.25701700

C -4.82934100 -3.28654500 0.55233700

H -5.75381800 -1.61918500 -0.43157300

C -2.42823200 -3.39476800 0.44038400

H -1.45584300 -1.75116500 -0.52390100

C -3.63913900 -3.94661300 0.86119300

H -5.78115900 -3.70983900 0.86263700

H -1.48892600 -3.88303900 0.68477400

H -3.65286800 -4.87249200 1.42830400

N -3.00889900 -0.65960200 -2.78302300

H -2.33284600 -1.41863600 -2.66876900

H -2.49529900 0.11533500 -3.24475000

H -3.75449000 -1.00048400 -3.41661600

O -2.08766500 3.76749300 -2.59092500

H -2.89707500 1.43716300 -0.59587900

H -1.27630000 4.23941900 -2.33778900

O -1.29022700 1.40435700 -3.42826000

H -0.47894700 1.44426400 -3.95648700

H -1.57345000 2.35145600 -3.22260900

O -2.42092700 2.28358500 -0.34995700

H -2.42669300 2.32155900 0.62076800

H -2.41577300 3.41161500 -1.73115300

**33**

Zero-point correction= 0.224439 (Hartree/Particle)

Thermal correction to Energy= 0.235851

Thermal correction to Enthalpy= 0.236795

Thermal correction to Gibbs Free Energy= 0.186765

Sum of electronic and zero-point Energies= -557.455623

Sum of electronic and thermal Energies= -557.444211

Sum of electronic and thermal Enthalpies= -557.443267

Sum of electronic and thermal Free Energies= -557.493297

C 0.01750800 1.18686900 -0.44629400

C 1.28370300 0.35782300 -0.25127300

C 2.45100700 0.93797300 0.25617900

C 1.30931200 -0.99346200 -0.62148900

C 3.61499300 0.18096300 0.40126700

H 2.43735700 1.98779000 0.52691300

C 2.47289000 -1.74777900 -0.48363200

H 0.40923300 -1.45803600 -1.01290900

C 3.63108900 -1.16377100 0.03301400

H 4.51171100 0.64671200 0.80152500

H 2.47316400 -2.79456600 -0.77543100

H 4.53708700 -1.75276800 0.14632800

C -1.25620500 0.39415600 -0.17707700

C -1.43757800 -0.27188300 1.04334900

C -2.29172600 0.36802600 -1.11472900

C -2.62800700 -0.93889800 1.31964800

H -0.62997200 -0.27887300 1.77135400

C -3.48737600 -0.30158300 -0.84329100

H -2.16000900 0.87575000 -2.06783900

C -3.65917600 -0.95498600 0.37583400

H -2.75174700 -1.45307400 2.26892100

H -4.28075600 -0.31354200 -1.58566500

H -4.58687700 -1.47803900 0.59009600

N 0.08997600 2.43164000 0.34224900

H -0.74968600 2.97858300 0.15608400

H 0.04929500 2.19328100 1.33387900

H -0.01123900 1.50461000 -1.49803500

**Int1-N'**

Zero-point correction= 0.515308 (Hartree/Particle)

Thermal correction to Energy= 0.569280

Thermal correction to Enthalpy= 0.570224

Thermal correction to Gibbs Free Energy= 0.414805

Sum of electronic and zero-point Energies= -2022.093324

Sum of electronic and thermal Energies= -2022.039351

Sum of electronic and thermal Enthalpies= -2022.038407

Sum of electronic and thermal Free Energies= -2022.193827

Ag 0.10784600 -0.45569100 -1.38238100

N 0.58910800 -0.81999000 1.44480500

N 0.85778400 0.49502400 1.71077800

N 2.77908700 -0.11345500 -1.04525400

N 2.88647200 0.19425700 0.28313700

N 0.50042200 1.67459900 -1.06463600

N 1.35306000 2.17565200 -0.12146400

B 1.98434900 1.25519800 0.95214200

C -0.36305100 -1.17486400 2.29734400

C -0.75413300 -0.10575400 3.12409100

C 0.06455000 0.93703700 2.71332200

C 3.56171800 -1.16542500 -1.24194300

C 4.18169200 -1.58548200 -0.05258800

C 3.71607200 -0.68183000 0.89333700

C 0.12327100 2.68606500 -1.83510100

C 0.70514400 3.88555000 -1.40351700

C 1.48253600 3.50960500 -0.31478200

H 2.60321900 1.92240700 1.71852100

Br 0.13812100 2.71655600 3.38225600

Br -2.11621300 -0.07197500 4.45308100

Br -1.01465700 -2.97004200 2.35839900

Br 2.57174300 4.63968500 0.75447800

Br 0.46357000 5.62754400 -2.12573600

Br -1.02619000 2.40459100 -3.32009300

Br 4.08487300 -0.62947700 2.75744500

Br 5.35781400 -3.05959700 0.21717300

Br 3.70636300 -1.95156700 -2.97761800

C -0.70363900 -2.29883300 -1.93914200

C -0.32012500 -3.49226400 -1.24061700

C 0.96936900 -3.56238000 -0.65323200

C -1.20884900 -4.58467600 -1.04821400

C 1.39350800 -4.70995800 -0.00175600

H 1.62669500 -2.70772300 -0.73602000

C -0.79952500 -5.70445000 -0.33730500

H -2.23305000 -4.49704900 -1.39081300

C 0.50725700 -5.78081200 0.16093400

H 2.39627200 -4.75628500 0.41073700

H -1.49494600 -6.52024400 -0.16466400

H 0.82508700 -6.66600600 0.70460200

C -1.67165200 -2.37552000 -3.00442500

C -2.46477200 -1.23781100 -3.30104800

C -1.84124400 -3.53495600 -3.80531700

C -3.43400200 -1.28269100 -4.29163000

H -2.32387500 -0.33654500 -2.71424900

C -2.77643800 -3.55604200 -4.83259600

H -1.19869200 -4.39198500 -3.63867400

C -3.58635000 -2.43981600 -5.06520600

H -4.05716500 -0.41316500 -4.47754500

H -2.87777500 -4.43989200 -5.45498200

H -4.32368100 -2.46439000 -5.86251600

C -4.28347900 -0.74900000 -0.42765200

C -5.52226900 -0.91227100 0.44338500

C -5.56171300 -0.36851500 1.73339200

C -6.61495600 -1.65395200 -0.01288800

C -6.67314900 -0.56820400 2.55132500

H -4.72587000 0.22532900 2.09262500

C -7.73177300 -1.85028100 0.80107200

H -6.58533700 -2.08444200 -1.01084800

C -7.76256700 -1.30863900 2.08668100

H -6.69203400 -0.13738000 3.54865900

H -8.57578200 -2.42641700 0.43166400

H -8.63099400 -1.45910200 2.72184800

C -3.80410700 0.70171500 -0.43925100

C -2.71827300 1.13802500 0.32427900

C -4.50394600 1.64119100 -1.20942500

C -2.34604700 2.48539000 0.32931900

H -2.16208700 0.42854100 0.92635400

C -4.13492900 2.98417400 -1.20851500

H -5.35657800 1.31198200 -1.79988000

C -3.05189800 3.41208100 -0.43450500

H -1.49919600 2.80608400 0.92574100

H -4.68924600 3.69900900 -1.81054700

H -2.75577300 4.45711300 -0.43672400

N -3.29313500 -1.75022800 -0.01105400

H -2.36099000 -1.47833900 -0.31841400

H -3.25592900 -1.80546000 1.00370900

H -4.57560800 -0.99411600 -1.45700300

**TS1-N'**

Zero-point correction= 0.514080 (Hartree/Particle)

Thermal correction to Energy= 0.567336

Thermal correction to Enthalpy= 0.568280

Thermal correction to Gibbs Free Energy= 0.415316

Sum of electronic and zero-point Energies= -2022.082399

Sum of electronic and thermal Energies= -2022.029143

Sum of electronic and thermal Enthalpies= -2022.028199

Sum of electronic and thermal Free Energies= -2022.181163

Ag 0.59611500 0.53740600 -0.40743000

N -1.10725400 -0.09348300 1.78869500

N -2.25882900 -0.69039500 1.35455300

N -1.65244500 1.66899200 -0.98689900

N -2.74309200 1.13786300 -0.35867700

N -0.70180800 -1.31203700 -1.09582300

N -2.06807300 -1.20118100 -1.12570300

B -2.84242300 -0.37956700 -0.04935700

C -0.84938400 -0.61649400 2.97661600

C -1.81073500 -1.56713500 3.35466800

C -2.68799800 -1.57939900 2.28301600

C -1.90786600 2.95924300 -1.14942500

C -3.16026300 3.31232900 -0.62601600

C -3.65258100 2.11394500 -0.13228100

C -0.37850700 -2.21535800 -2.01490600

C -1.50931700 -2.70550600 -2.67941800

C -2.55913700 -2.02837700 -2.07750400

H -3.98130400 -0.70825500 -0.07473000

Br -4.25518000 -2.65908500 2.08906900

Br -1.90852100 -2.58887500 4.96495200

Br 0.67821000 -0.06274700 3.99488400

Br -4.41390800 -2.19139900 -2.50230300

Br -1.59424900 -4.00719900 -4.07068200

Br 1.43537900 -2.76139700 -2.27993400

Br -5.32329900 1.82013900 0.74886500

Br -4.00608000 5.02354500 -0.61110200

Br -0.65715300 4.10509400 -2.03912800

C 2.39719000 1.70818600 -0.25778100

C 2.63001800 2.57525200 0.90036600

C 1.52127800 3.00874200 1.66074300

C 3.91623100 3.02267600 1.29291600

C 1.67834300 3.90474700 2.71725100

H 0.53142500 2.64839600 1.39910700

C 4.07546500 3.87465800 2.38043000

H 4.78916000 2.66474900 0.75804400

C 2.95584300 4.33329300 3.08572800

H 0.80684800 4.24748700 3.26732100

H 5.07197800 4.18748200 2.67863200

H 3.08206600 5.00953800 3.92645100

C 3.13398800 1.97950400 -1.49172100

C 3.15937200 1.00758100 -2.52340700

C 3.74135000 3.23152000 -1.76210100

C 3.79604200 1.24841000 -3.73415400

H 2.67023600 0.05550400 -2.34550200

C 4.34752200 3.48511400 -2.99170700

H 3.69867900 4.02194100 -1.02241000

C 4.39073900 2.49403500 -3.97489200

H 3.81393400 0.47837600 -4.50002200

H 4.78568100 4.46045500 -3.18255800

H 4.86871500 2.69357000 -4.92968500

C 4.99999500 -0.77454800 -0.07786500

C 6.27528700 -0.05190500 0.35763400

C 6.73133600 -0.12009400 1.68332200

C 7.01454800 0.69372000 -0.56980000

C 7.89291100 0.54831100 2.07177300

H 6.18230600 -0.70600600 2.41602400

C 8.18181700 1.35942300 -0.18396300

H 6.67426700 0.75506900 -1.60009600

C 8.62340500 1.28981200 1.13828500

H 8.23153600 0.48502300 3.10224800

H 8.74261000 1.93194800 -0.91764900

H 9.52991300 1.80677800 1.44030200

C 5.11569800 -2.29518000 0.08697800

C 4.67139400 -2.96167100 1.23708600

C 5.69680300 -3.04928800 -0.94368000

C 4.80872200 -4.34775500 1.35549500

H 4.20847000 -2.40164000 2.04479500

C 5.83501600 -4.43338100 -0.82785900

H 6.04471900 -2.54555500 -1.84274100

C 5.39049300 -5.08833000 0.32461600

H 4.45777200 -4.84728800 2.25442400

H 6.28661500 -5.00014400 -1.63756200

H 5.49416000 -6.16582100 0.41598700

N 3.82660200 -0.18332200 0.58619200

H 3.02789100 -0.81118300 0.56038400

H 4.00959900 0.05126900 1.55845300

H 4.87964400 -0.58615400 -1.15195500

**Int2-N'**

Zero-point correction= 0.520194 (Hartree/Particle)

Thermal correction to Energy= 0.572142

Thermal correction to Enthalpy= 0.573087

Thermal correction to Gibbs Free Energy= 0.426404

Sum of electronic and zero-point Energies= -2022.115699

Sum of electronic and thermal Energies= -2022.063751

Sum of electronic and thermal Enthalpies= -2022.062807

Sum of electronic and thermal Free Energies= -2022.209490

Ag -0.49278400 -0.05993700 1.71729000

N -0.24188700 -1.96369400 -0.61268500

N -0.56649600 -1.07481900 -1.60008600

N -2.47776600 -0.46630100 0.98279000

N -2.71319400 -0.55591300 -0.36047900

N 0.25021000 1.57478900 -1.05456500

N -1.09722600 1.32348300 -0.95936600

B -1.69927600 -0.04433300 -1.41277500

C 0.69153700 -2.75297600 -1.12830900

C 1.01259200 -2.39285000 -2.45123200

C 0.17356800 -1.31678400 -2.70771900

C -3.55133400 -0.93715300 1.60585800

C -4.52071400 -1.35190700 0.68287900

C -3.94001200 -1.09246900 -0.55219900

C 0.38618900 2.89105400 -0.93425100

C -0.85082600 3.53105000 -0.75166700

C -1.76563700 2.48886100 -0.78672600

H -2.27576600 0.10509200 -2.44484700

Br 0.04104000 -0.28302200 -4.29630900

Br 2.30776200 -3.17059500 -3.60928500

Br 1.37093700 -4.24941300 -0.14961500

Br -3.66036200 2.58997900 -0.65856600

Br -1.20117800 5.38475900 -0.50449800

Br 2.10624200 3.70961000 -1.00713100

Br -4.69756400 -1.41178900 -2.26303200

Br -6.23728100 -2.08699000 1.03745400

Br -3.61891000 -0.98736100 3.50413500

C 1.57584600 0.40238900 2.14258500

C 2.04613400 -0.62147800 3.14398500

C 2.28541100 -0.28925800 4.48754900

C 2.15630500 -1.97959000 2.79035900

C 2.66552300 -1.26137800 5.41621100

H 2.16505600 0.73579500 4.81762900

C 2.54974000 -2.94478100 3.70696000

H 1.93034800 -2.30494800 1.78241300

C 2.81833100 -2.59164100 5.03267100

H 2.84598900 -0.96650900 6.44660600

H 2.64285500 -3.97713500 3.38217600

H 3.12526300 -3.34380100 5.75332800

C 1.81300000 1.85832100 2.50093300

C 0.80846900 2.81548000 2.29644600

C 3.03765400 2.31572800 3.02473900

C 1.01518800 4.16749000 2.57085200

H -0.15375400 2.49072800 1.91219400

C 3.25535500 3.66545900 3.29833900

H 3.81839100 1.60027100 3.25987000

C 2.24444800 4.59966000 3.06581400

H 0.21526500 4.87853100 2.38993600

H 4.21197400 3.98459800 3.70290500

H 2.41057200 5.65155600 3.27947000

C 3.74278500 0.32866200 0.54881800

C 4.48299600 -0.92588300 0.96639700

C 4.41546700 -2.08395200 0.18412700

C 5.22134500 -0.94398700 2.15254700

C 5.04116100 -3.25482300 0.60673800

H 3.87540200 -2.07685900 -0.75790400

C 5.85538600 -2.11123100 2.57264200

H 5.27707200 -0.04983700 2.76570800

C 5.75885500 -3.27234900 1.80427500

H 4.96993800 -4.15027800 -0.00339200

H 6.41149900 -2.11687300 3.50505900

H 6.24532600 -4.18567800 2.13405100

C 4.05859800 0.75611300 -0.86909300

C 3.33821600 0.30679600 -1.97744800

C 5.14150100 1.62085700 -1.06394900

C 3.68812400 0.72315500 -3.26281200

H 2.48589100 -0.35032600 -1.85656700

C 5.49423100 2.03579400 -2.34578200

H 5.70507600 1.97366400 -0.20387600

C 4.76484800 1.58816700 -3.45065800

H 3.11011700 0.37152300 -4.11073700

H 6.33381100 2.71118400 -2.48253300

H 5.03407100 1.91477200 -4.45067700

N 2.23499100 0.14816100 0.74670900

H 1.72032700 0.74547300 0.07557200

H 1.98531000 -0.80374400 0.46693800

H 4.01108900 1.14710400 1.21202600

**Int3-N'**

Zero-point correction= 0.595912 (Hartree/Particle)

Thermal correction to Energy= 0.654808

Thermal correction to Enthalpy= 0.655752

Thermal correction to Gibbs Free Energy= 0.494555

Sum of electronic and zero-point Energies= -2251.343820

Sum of electronic and thermal Energies= -2251.284925

Sum of electronic and thermal Enthalpies= -2251.283981

Sum of electronic and thermal Free Energies= -2251.445177

Ag 0.36795800 -0.66497000 -0.62945900

N -1.79640700 -0.66123100 -1.42738900

N -2.78789900 -0.69109700 -0.47849000

N -1.30177100 -2.03895700 1.50067500

N -1.59538700 -0.72305200 1.75545600

N -0.69015400 1.59802000 0.24436500

N -2.01340600 1.45920500 0.53900600

B -2.59064000 0.06164300 0.86259400

C -2.36248700 -1.03980000 -2.56802300

C -3.71710200 -1.35385700 -2.39475500

C -3.94042500 -1.11258800 -1.04580500

C -0.66173800 -2.47952100 2.57824900

C -0.51073000 -1.47820500 3.55105100

C -1.13766000 -0.37952200 2.98221000

C -0.51499000 2.85411300 -0.12730000

C -1.71856100 3.57810800 -0.08769200

C -2.64913100 2.63832000 0.33841400

H -3.64243900 0.18106900 1.40526700

Br -5.56997700 -1.32605700 -0.09662100

Br -4.96519200 -1.94675600 -3.70010600

Br -1.42193100 -0.98639600 -4.22670800

Br -4.51753200 2.88123200 0.59880600

Br -2.01079700 5.41133400 -0.50898000

Br 1.23065700 3.46870000 -0.62535600

Br -1.43552300 1.33030800 3.76032400

Br 0.34735400 -1.58929200 5.24240500

Br -0.12880000 -4.31112100 2.72761200

C 2.49867300 -0.77770400 -0.00845400

C 2.97696100 -2.16115100 -0.31198200

C 3.68822000 -2.53422600 -1.46128900

C 2.62979500 -3.19094900 0.59179200

C 4.01977600 -3.86927800 -1.70670800

H 3.98030500 -1.79976700 -2.19914900

C 2.96259200 -4.51891600 0.34878600

H 2.09553300 -2.93204000 1.49834900

C 3.66120800 -4.87235700 -0.81204300

H 4.55943800 -4.11560400 -2.61658100

H 2.67653900 -5.27856900 1.07163900

H 3.91889000 -5.90865100 -1.00766300

C 2.75266300 -0.33052600 1.42209100

C 3.81881100 -0.85395500 2.17720300

C 1.98913900 0.69351200 2.00016500

C 4.11429700 -0.36462200 3.45021100

H 4.41826500 -1.66034200 1.76752600

C 2.29191000 1.19816100 3.26409800

H 1.14034100 1.08940900 1.45721100

C 3.35711700 0.67330600 3.99638100

H 4.94089200 -0.79227000 4.01117300

H 1.67863300 1.98988700 3.68242100

H 3.58480400 1.05708700 4.98670200

N 3.15021200 0.26620200 -0.93079900

H 2.64079700 1.13498800 -0.75050500

H 2.88852000 0.01351200 -1.91123200

O 1.12381400 -2.93853800 -3.17574300

H 0.56887200 -3.87378600 -0.30830400

H 0.41950400 -3.08598100 -3.82540300

O 1.96939400 -0.37257500 -3.38171700

H 1.12430700 0.10372200 -3.39150500

H 1.70032800 -1.33299300 -3.30716200

O -0.21064800 -3.64805800 -0.84851200

H -0.77364000 -3.11830900 -0.24768500

H 0.68247400 -3.11664900 -2.31003300

C 4.64771800 0.59925200 -0.76416000

H 4.96584800 0.00576700 0.09158600

C 4.75025200 2.06911500 -0.38791300

C 4.70062500 3.07833200 -1.35827100

C 4.80221900 2.42519500 0.96473600

C 4.68641300 4.42128300 -0.97916300

H 4.68696800 2.81849000 -2.41151300

C 4.79513900 3.76763700 1.34245700

H 4.83217100 1.65167800 1.72435200

C 4.73083400 4.76920900 0.37324000

H 4.64916300 5.19472800 -1.74086100

H 4.83124300 4.02697200 2.39626700

H 4.71963900 5.81467000 0.66692700

C 5.48589300 0.20209000 -1.95808600

C 6.74408900 -0.35990000 -1.71095800

C 5.08206800 0.40095700 -3.28429200

C 7.58600200 -0.71441300 -2.76265300

H 7.06104100 -0.52553000 -0.68460900

C 5.92136200 0.03625900 -4.33820200

H 4.09903200 0.79660600 -3.51355500

C 7.17530200 -0.51808000 -4.08247800

H 8.55674500 -1.15331500 -2.55155200

H 5.58664900 0.18267300 -5.36082900

H 7.82499200 -0.80235000 -4.90496100

**Int3-N''**

Zero-point correction= 0.745174 (Hartree/Particle)

Thermal correction to Energy= 0.808882

Thermal correction to Enthalpy= 0.809826

Thermal correction to Gibbs Free Energy= 0.636626

Sum of electronic and zero-point Energies= -2579.601082

Sum of electronic and thermal Energies= -2579.537374

Sum of electronic and thermal Enthalpies= -2579.536430

Sum of electronic and thermal Free Energies= -2579.709630

Ag 0.23815100 0.54956700 0.96622600

N -1.68183900 -0.38360200 1.52624400

N -2.88580700 -0.15416200 0.92392800

N -1.71675200 2.47017500 0.89525600

N -2.42911900 2.08158500 -0.20708700

N -0.77780200 0.27728000 -1.59281100

N -2.10374700 -0.03305300 -1.48594700

B -2.97937900 0.65029500 -0.39351100

C -1.91255400 -1.10749800 2.61230400

C -3.27886900 -1.38940100 2.74377300

C -3.85695200 -0.76250300 1.64744200

C -1.31260100 3.70923400 0.64970900

C -1.73147500 4.15722900 -0.61513500

C -2.44025900 3.07830900 -1.12237800

C -0.31608200 -0.42949200 -2.61433600

C -1.31910600 -1.22252400 -3.19783900

C -2.44593900 -0.92971400 -2.43903500

H -4.11029600 0.66817500 -0.75914900

Br -5.69934800 -0.75122300 1.17973900

Br -4.13409300 -2.43320000 4.08186300

Br -0.47988200 -1.59585100 3.76253300

Br -4.18923200 -1.66981300 -2.59560800

Br -1.18306500 -2.41294000 -4.67864500

Br 1.52782600 -0.32791900 -3.10827000

Br -3.29311800 2.91450900 -2.81732500

Br -1.41851000 5.84242300 -1.44507500

Br -0.29511500 4.67931800 1.93974300

C 2.34834400 1.10819900 1.11010100

C 2.61223300 0.87959800 2.56990800

C 3.27775700 -0.23654800 3.10449600

C 2.03478100 1.77960200 3.49457900

C 3.35688500 -0.44813600 4.48311500

H 3.75553300 -0.95751000 2.45706000

C 2.11747900 1.57050700 4.86530800

H 1.48319800 2.63530200 3.12055100

C 2.78062900 0.44994500 5.37802300

H 3.89389400 -1.31933300 4.84983700

H 1.65001300 2.28378300 5.53881800

H 2.84618900 0.28650700 6.44953400

C 2.52073000 2.51621200 0.58571700

C 3.35332900 3.45776900 1.21188600

C 1.88488100 2.89557300 -0.60968200

C 3.53349000 4.73211100 0.67127600

H 3.84638300 3.19429100 2.14216000

C 2.07626700 4.16029400 -1.16131600

H 1.20307800 2.20076400 -1.09304500

C 2.89962700 5.08806400 -0.51958400

H 4.17372300 5.44616900 1.18256400

H 1.55689100 4.43009100 -2.07569100

H 3.03381000 6.08157700 -0.93727100

C 4.62013600 0.50726300 -0.13000700

C 5.55622400 -0.06892900 0.90915300

C 5.85956200 -1.43547300 0.95920000

C 6.10364200 0.78455900 1.87137100

C 6.65990000 -1.94043400 1.98255500

H 5.47148100 -2.10821900 0.20277500

C 6.91248700 0.28279700 2.88958500

H 5.86904100 1.84421000 1.83668900

C 7.18321100 -1.08402000 2.95441400

H 6.88244100 -3.00327300 2.01719000

H 7.31990700 0.95684500 3.63701900

H 7.80556700 -1.48007600 3.75150400

C 4.92643700 0.09980800 -1.55582800

C 4.57716100 -1.15820600 -2.06217600

C 5.56825200 1.01489400 -2.39785500

C 4.87240900 -1.49987000 -3.38252700

H 4.04915800 -1.87760400 -1.44783900

C 5.86680600 0.67540000 -3.71733000

H 5.82796500 1.99949200 -2.01798100

C 5.52004500 -0.58371300 -4.21292500

H 4.58476000 -2.47948700 -3.75104900

H 6.36221800 1.39716800 -4.36000600

H 5.74797800 -0.84607500 -5.24183200

N 3.15014700 0.18342300 0.18327200

H 2.66491500 0.22507000 -0.71667600

H 3.01054800 -0.81067500 0.50495400

H 4.66875000 1.59437000 -0.07151500

C 1.27610800 -2.87321000 -0.05000000

C 2.11205700 -3.71351900 -1.00105300

C 3.37908700 -4.20493100 -0.67186700

C 1.58796500 -3.99963100 -2.26816500

C 4.11356400 -4.95601400 -1.59491600

H 3.82145100 -3.98420300 0.29438900

C 2.31783300 -4.74274200 -3.19123500

H 0.60262100 -3.62953700 -2.53261200

C 3.58780700 -5.22428200 -2.85775500

H 5.09916900 -5.32417700 -1.32429800

H 1.89635100 -4.94237200 -4.17229200

H 4.15961300 -5.80446500 -3.57619000

C 0.03759900 -3.61633900 0.43407100

C -1.22899700 -3.18367200 0.03597600

C 0.14091700 -4.71488700 1.29472400

C -2.38061200 -3.82034400 0.50188700

H -1.31298300 -2.33397200 -0.62907200

C -1.00575800 -5.34689300 1.77205000

H 1.12142600 -5.07911800 1.59379400

C -2.27089200 -4.89792100 1.38011600

H -3.35689800 -3.46425200 0.18739700

H -0.91473600 -6.19333400 2.44683100

H -3.16376200 -5.38816100 1.75625500

N 2.09752000 -2.31960800 1.04452000

H 1.47916600 -1.80805600 1.67667600

H 2.49322100 -3.06768700 1.61228600

H 0.91930200 -2.00244900 -0.61064100

**Int4-N'**

Zero-point correction= 0.487074 (Hartree/Particle)

Thermal correction to Energy= 0.515979

Thermal correction to Enthalpy= 0.516923

Thermal correction to Gibbs Free Energy= 0.427273

Sum of electronic and zero-point Energies= -1287.585554

Sum of electronic and thermal Energies= -1287.556649

Sum of electronic and thermal Enthalpies= -1287.555705

Sum of electronic and thermal Free Energies= -1287.645355

C 1.03059100 0.86696000 0.65447900

C 1.99194400 -0.26811200 0.49047000

C 2.52380500 -0.65295800 -0.75218000

C 2.36965300 -1.02503700 1.61576900

C 3.34159200 -1.77345500 -0.87745500

H 2.26730100 -0.07751800 -1.63371000

C 3.17643800 -2.15853400 1.49478900

H 2.03795000 -0.70733100 2.59985500

C 3.65908200 -2.54322600 0.24319900

H 3.71408700 -2.05822700 -1.85778500

H 3.44741700 -2.72412100 2.38286400

H 4.28890800 -3.42309800 0.14444900

C 1.18350800 2.10755000 -0.09833100

C 2.45268200 2.51921300 -0.57645800

C 0.12154500 3.03064400 -0.27991200

C 2.63590300 3.74440500 -1.20547000

H 3.30486000 1.86323300 -0.43467900

C 0.31288600 4.25657700 -0.91392200

H -0.87299900 2.80962300 0.10002000

C 1.56840400 4.62777500 -1.39263400

H 3.62943200 4.01260100 -1.55736000

H -0.53497300 4.92784300 -1.02974300

H 1.71484700 5.58105600 -1.89144300

N -0.39449700 0.37065000 0.70725000

H -0.93593100 1.04305200 1.26365300

H -0.41204700 -0.50304000 1.28676200

O 0.27157400 -0.50465000 4.52327400

H 0.84527900 1.42947100 2.21496500

H -0.38705000 -0.40765700 5.22674000

O -0.49533900 -1.88672400 2.36726100

H 0.34481400 -2.30434400 2.11314500

H -0.28779600 -1.45174300 3.24377600

O 0.34284000 1.72581800 3.10347100

H 0.80944400 2.52059600 3.40270500

H 0.33354900 0.39908000 4.09258700

C -1.16868600 0.13561800 -0.59307100

H -0.97483000 1.02762400 -1.18754200

C -2.65328100 0.07952200 -0.29560400

C -3.52111500 0.85060000 -1.07742000

C -3.18416200 -0.71476700 0.73058600

C -4.89675700 0.82219800 -0.85387800

H -3.11280000 1.47473900 -1.86842800

C -4.56029000 -0.73530000 0.95777500

H -2.53125100 -1.31428700 1.35760800

C -5.42009500 0.02780400 0.16674200

H -5.55690800 1.42435500 -1.47161800

H -4.96061500 -1.35277300 1.75695100

H -6.49102200 0.00668500 0.34726400

C -0.63038500 -1.05093500 -1.36223100

C -0.15719000 -0.83893100 -2.66048300

C -0.60069600 -2.34563400 -0.83136700

C 0.36229100 -1.89268400 -3.41139500

H -0.17510600 0.16516800 -3.07634900

C -0.06615200 -3.39563800 -1.57384300

H -0.98171400 -2.53612500 0.16526500

C 0.41982400 -3.17332100 -2.86385200

H 0.73202100 -1.70915400 -4.41621400

H -0.03022800 -4.39232700 -1.14350600

H 0.83621100 -3.99548200 -3.43884800

**TS2-N'**

Zero-point correction= 0.484722 (Hartree/Particle)

Thermal correction to Energy= 0.512803

Thermal correction to Enthalpy= 0.513747

Thermal correction to Gibbs Free Energy= 0.427007

Sum of electronic and zero-point Energies= -1287.583519

Sum of electronic and thermal Energies= -1287.555438

Sum of electronic and thermal Enthalpies= -1287.554494

Sum of electronic and thermal Free Energies= -1287.641233

C 1.04849600 0.81614200 0.77237300

C 2.01432800 -0.30964000 0.52352800

C 2.48114000 -0.66301000 -0.75264200

C 2.44716500 -1.08560000 1.61359500

C 3.30412600 -1.77130800 -0.94206600

H 2.17551700 -0.07488700 -1.60921400

C 3.26309400 -2.20402400 1.42860200

H 2.13899000 -0.80632300 2.61657800

C 3.68875400 -2.55541900 0.14662100

H 3.62935100 -2.03200300 -1.94548000

H 3.57862300 -2.78813500 2.28925600

H 4.32365600 -3.42483400 -0.00088300

C 1.20324800 2.09634300 0.05613500

C 2.44572300 2.49028100 -0.48608200

C 0.16082300 3.05141100 0.00416000

C 2.62335300 3.74234400 -1.06763900

H 3.28441500 1.80480000 -0.43760500

C 0.34017600 4.30008300 -0.58655600

H -0.80405000 2.83391400 0.45498600

C 1.57121500 4.65750800 -1.13633100

H 3.59708600 4.00257900 -1.47542500

H -0.49099200 5.00069000 -0.60776100

H 1.71049000 5.63013800 -1.59882700

N -0.38862900 0.30034400 0.75291900

H -0.90569900 0.89660300 1.41341100

H -0.38336900 -0.63715000 1.22801500

O 0.29315000 -0.89570800 4.40509800

H 0.87896900 1.17569700 2.17876300

H -0.37177100 -0.87835800 5.10907900

O -0.41946700 -2.10860900 2.15838100

H 0.43186200 -2.48792500 1.88300300

H -0.22635000 -1.73764700 3.07262800

O 0.27778400 1.38867600 3.18362600

H 0.71775800 2.14846700 3.59307500

H 0.31189400 0.05020100 4.02948000

C -1.17686800 0.22008700 -0.54272000

H -1.00392700 1.17604100 -1.03600700

C -2.65741600 0.11217200 -0.23071400

C -3.54911200 0.92844200 -0.93535600

C -3.15977100 -0.78077800 0.72588300

C -4.92124300 0.85125900 -0.70211800

H -3.16280400 1.62704200 -1.67343700

C -4.53259800 -0.85068000 0.96316000

H -2.48817300 -1.42087400 1.29010500

C -5.41662000 -0.03986700 0.25030400

H -5.60050200 1.49080000 -1.25851600

H -4.91098900 -1.54424100 1.70875200

H -6.48475900 -0.09934300 0.43854100

C -0.65457200 -0.86737700 -1.45794100

C -0.20796500 -0.50687000 -2.73244500

C -0.61802100 -2.21422100 -1.07913200

C 0.29250400 -1.46828000 -3.61028700

H -0.23088000 0.53850900 -3.02943400

C -0.10515300 -3.17274500 -1.94952200

H -0.97344400 -2.51595100 -0.10036900

C 0.35455400 -2.80397800 -3.21554900

H 0.64214000 -1.17100600 -4.59487200

H -0.06442600 -4.21246200 -1.63780700

H 0.75388500 -3.55526600 -3.89089200

**TS2-N''**

Zero-point correction= 0.596353 (Hartree/Particle)

Thermal correction to Energy= 0.654480

Thermal correction to Enthalpy= 0.655424

Thermal correction to Gibbs Free Energy= 0.496422

Sum of electronic and zero-point Energies= -2251.322753

Sum of electronic and thermal Energies= -2251.264625

Sum of electronic and thermal Enthalpies= -2251.263681

Sum of electronic and thermal Free Energies= -2251.422684

Ag 0.34609100 -0.76979600 -1.06510100

N -1.94737400 -1.20400500 -1.86347400

N -2.80682300 -0.80597300 -0.87693000

N -1.64596700 -0.66511300 1.71525600

N -2.15561100 0.49257000 1.19484000

N -0.45803800 1.36856300 -1.05402800

N -1.81726800 1.52302800 -1.08977900

B -2.73269800 0.60328800 -0.24442300

C -2.31441100 -2.43637800 -2.19026300

C -3.40616300 -2.87974400 -1.43206000

C -3.68435000 -1.79659000 -0.60589800

C -1.38888700 -0.41331700 2.99274500

C -1.72513500 0.90365600 3.34526500

C -2.20511300 1.43991800 2.16120600

C 0.06270200 2.37454200 -1.74709300

C -0.93726400 3.21246500 -2.25522000

C -2.11816800 2.62614700 -1.81199200

H -3.82125100 1.08609000 -0.20010300

Br -5.03744900 -1.63944500 0.71541000

Br -4.30388400 -4.55457900 -1.50893200

Br -1.39364400 -3.38080700 -3.57917400

Br -3.88782200 3.23471700 -2.13170100

Br -0.73002600 4.79440200 -3.29077200

Br 1.95620400 2.54815300 -1.90644800

Br -2.80469800 3.21554700 1.83135700

Br -1.57049700 1.75709000 5.03606200

Br -0.62968300 -1.75161000 4.11960500

C 2.63355400 -1.02611000 1.07602400

C 3.19310800 -2.33664000 1.42464800

C 3.98456400 -3.10476300 0.54027500

C 2.83606200 -2.96091800 2.64730100

C 4.40488900 -4.39404400 0.86328100

H 4.27356500 -2.71471400 -0.42697900

C 3.25898200 -4.24532900 2.96350400

H 2.19446500 -2.43103500 3.34162300

C 4.05605900 -4.97870000 2.07868200

H 5.01281800 -4.94103600 0.14723000

H 2.95815900 -4.68067000 3.91336700

H 4.38611100 -5.98229800 2.32898500

C 2.40589800 0.01099100 2.12338400

C 3.11578200 0.05098800 3.33925900

C 1.50791400 1.06574000 1.86792400

C 2.94441100 1.10039700 4.24352400

H 3.81698700 -0.74405100 3.57087400

C 1.35994700 2.13087000 2.75102800

H 0.90770000 1.04339900 0.96379500

C 2.07772200 2.15493100 3.94912300

H 3.50620400 1.10234700 5.17408000

H 0.66034000 2.92823200 2.51670700

H 1.94605800 2.97245900 4.65152500

N 3.34457100 -0.38266500 -0.08797200

H 2.82700000 0.46682400 -0.32242600

H 3.25200400 -0.98886100 -0.91565100

O 1.23484000 -4.20947000 -1.31801400

H 0.93591900 -2.06844700 0.90425700

H 0.45988500 -4.42491700 -1.86354400

O 2.13159800 -1.90161500 -2.20443300

H 2.02791500 -1.86257500 -3.16736900

H 1.87593200 -2.84109300 -1.92328100

O 0.13784700 -2.56053900 0.56068300

H -0.64016200 -2.14668500 0.99873500

H 0.83923300 -3.84530400 -0.49059100

C 4.84402600 0.05291100 0.09136200

H 5.06633300 -0.23222600 1.11987600

C 4.92925200 1.56501800 -0.03706200

C 5.28434800 2.19743000 -1.23683100

C 4.58768700 2.35743700 1.06800500

C 5.27311800 3.59047400 -1.33429700

H 5.59151200 1.60753700 -2.09256100

C 4.57674400 3.74747700 0.96919700

H 4.31960400 1.88598600 2.00646100

C 4.91270700 4.37005200 -0.23376900

H 5.55501900 4.06418800 -2.27033000

H 4.30097600 4.33976700 1.83635400

H 4.90191500 5.45313500 -0.31232600

C 5.73852600 -0.72033700 -0.84403500

C 6.90930400 -1.29927200 -0.34265000

C 5.43321900 -0.88056300 -2.20274400

C 7.75933800 -2.02155000 -1.17707800

H 7.14343500 -1.19622100 0.71310500

C 6.27913700 -1.61115200 -3.03809900

H 4.52742100 -0.44594900 -2.61610100

C 7.44496900 -2.18259600 -2.52820300

H 8.66095500 -2.46922900 -0.76973800

H 6.02603600 -1.73147300 -4.08749600

H 8.10207300 -2.75306900 -3.17774400

**TS2-N'''**

Zero-point correction= 0.739711 (Hartree/Particle)

Thermal correction to Energy= 0.804954

Thermal correction to Enthalpy= 0.805898

Thermal correction to Gibbs Free Energy= 0.628605

Sum of electronic and zero-point Energies= -2579.559637

Sum of electronic and thermal Energies= -2579.494394

Sum of electronic and thermal Enthalpies= -2579.493450

Sum of electronic and thermal Free Energies= -2579.670742

Ag 0.19087500 1.07869100 0.28193900

N -1.47907700 -0.19265200 1.52049100

N -2.62901900 -0.55062700 0.87280000

N -1.79090300 2.13429700 -0.31106900

N -2.85054300 1.39005500 -0.75076300

N -0.58501900 -0.34893000 -1.69302800

N -1.86093000 -0.81954200 -1.54915400

B -2.89176800 -0.14630000 -0.60111400

C -1.62014000 -0.56614500 2.78349000

C -2.85665200 -1.19150400 2.99890400

C -3.46433200 -1.15735600 1.75232400

C -2.09128700 3.40612600 -0.52051200

C -3.35835800 3.53474400 -1.11153300

C -3.80182500 2.22596500 -1.23775500

C 0.02331700 -1.16328500 -2.54718200

C -0.82987800 -2.19515500 -2.97022700

C -2.02260300 -1.92963800 -2.30945200

H -3.96960700 -0.52636900 -0.90146300

Br -5.17438400 -1.85643900 1.29767300

Br -3.53802400 -1.92712700 4.61391500

Br -0.26953300 -0.17250900 4.07006700

Br -3.62115800 -2.95818900 -2.36684300

Br -0.43923000 -3.63781700 -4.14852000

Br 1.84817200 -0.90635900 -3.04348000

Br -5.45824000 1.64055300 -1.97039600

Br -4.26168000 5.13137300 -1.61672000

Br -0.85868600 4.76653500 -0.03066000

C 2.64209300 1.34662400 0.68097500

C 2.90889500 1.54804800 2.15749800

C 3.93672200 0.88434200 2.84099500

C 2.02108000 2.32724500 2.92290200

C 4.08503400 1.00614300 4.22492900

H 4.64120900 0.28259900 2.28283800

C 2.17580500 2.46691100 4.29857100

H 1.18422100 2.81719600 2.43064300

C 3.21196400 1.80302700 4.96394600

H 4.90259300 0.48639900 4.71758500

H 1.47292500 3.08041000 4.85570900

H 3.33276800 1.90837200 6.03827800

C 2.46560300 2.65298100 -0.10403300

C 2.83134000 3.90553100 0.41494500

C 2.07868300 2.61097500 -1.45939100

C 2.78549900 5.06046600 -0.37131600

H 3.16905900 3.98198400 1.44138700

C 2.03436700 3.75837400 -2.24613300

H 1.82805900 1.65785900 -1.91190200

C 2.38689900 4.99742100 -1.70562300

H 3.07968300 6.01167300 0.06498700

H 1.72131700 3.68115300 -3.28365500

H 2.35270900 5.89531300 -2.31541500

C 4.82022600 1.05530200 -0.63747600

C 5.95160800 1.23219300 0.36432800

C 6.70612000 0.14543600 0.82299300

C 6.20382200 2.50017000 0.89364400

C 7.67119300 0.32152600 1.81291800

H 6.53038400 -0.84230300 0.40876800

C 7.16915900 2.68085900 1.88541000

H 5.61774800 3.34554100 0.54359000

C 7.90147800 1.59012000 2.35290600

H 8.24797900 -0.53072800 2.16261000

H 7.34343400 3.67149200 2.29616000

H 8.65128500 1.72594000 3.12727300

C 5.21047600 0.21052200 -1.83772600

C 5.13610500 -1.18952100 -1.81859300

C 5.63622500 0.84462300 -3.01096700

C 5.48201500 -1.93398800 -2.94788000

H 4.78772600 -1.70173000 -0.92894300

C 5.98357700 0.10280800 -4.13995800

H 5.68711400 1.93009900 -3.03804500

C 5.90651000 -1.29167200 -4.11190600

H 5.41018400 -3.01628100 -2.91069900

H 6.30762300 0.61339800 -5.04252100

H 6.17266300 -1.87157400 -4.99110900

N 3.62171000 0.45319000 0.00361400

H 3.12136800 -0.02970100 -0.73663100

H 2.99405400 -1.15348600 1.59018600

H 4.58389000 2.05393700 -1.02297400

C 1.48106900 -2.28683200 0.68588900

C 2.61122000 -3.20015200 0.23119100

C 3.75222200 -3.43201900 1.00652200

C 2.48385700 -3.85755600 -0.99700800

C 4.76077300 -4.28200500 0.54813600

H 3.86936100 -2.95467600 1.97589900

C 3.48404500 -4.71339500 -1.45267700

H 1.59894700 -3.69368100 -1.60340500

C 4.63159700 -4.92281800 -0.68423700

H 5.64529000 -4.44293200 1.15749200

H 3.37016900 -5.20727400 -2.41330000

H 5.41733400 -5.58168300 -1.04180600

C 0.38415300 -3.06790900 1.39099900

C -0.80291100 -3.34569700 0.70965800

C 0.54814300 -3.54375500 2.69593000

C -1.82226200 -4.07214100 1.32421300

H -0.93162300 -2.98363000 -0.30300000

C -0.47296200 -4.26199200 3.31704100

H 1.47438200 -3.35531000 3.23323200

C -1.66116600 -4.52730100 2.63307500

H -2.74402100 -4.26621800 0.78418800

H -0.34057800 -4.61462000 4.33557000

H -2.45854900 -5.07901500 3.12111900

N 1.97806900 -1.16139700 1.51608400

H 1.84247900 0.07022300 0.99629300

H 1.56527000 -1.13871300 2.44672300

H 1.03446600 -1.84202400 -0.20684600

**33''**

Zero-point correction= 0.412035 (Hartree/Particle)

Thermal correction to Energy= 0.433716

Thermal correction to Enthalpy= 0.434660

Thermal correction to Gibbs Free Energy= 0.361403

Sum of electronic and zero-point Energies= -1058.402528

Sum of electronic and thermal Energies= -1058.380847

Sum of electronic and thermal Enthalpies= -1058.379903

Sum of electronic and thermal Free Energies= -1058.453160

C -0.97799500 0.95147400 -1.15974500

C -2.22231100 0.05987400 -1.10985600

C -2.17905500 -1.32792600 -0.97345600

C -3.47470900 0.67515700 -1.26457200

C -3.35577100 -2.08233800 -0.96776000

H -1.23051200 -1.83433200 -0.86098400

C -4.64862600 -0.07185600 -1.25914800

H -3.52401000 1.75549100 -1.37964900

C -4.59366200 -1.46036900 -1.10644500

H -3.29382900 -3.16063100 -0.84918800

H -5.60690400 0.42716100 -1.37610300

H -5.50802100 -2.04715200 -1.10021600

C -0.95389800 2.01388600 -0.06467200

C -1.67082100 1.88445800 1.12825800

C -0.13774700 3.13781600 -0.24352300

C -1.57245900 2.85845800 2.12421900

H -2.30988100 1.02057500 1.27551300

C -0.03623200 4.11032500 0.74876400

H 0.43391400 3.23276300 -1.16274100

C -0.75516100 3.97289200 1.93857000

H -2.13683300 2.74366200 3.04562700

H 0.60211900 4.97579500 0.59426800

H -0.67929000 4.73074700 2.71321600

C 1.11128700 -0.03852200 -0.04026700

C 0.68517400 -1.34054900 0.62751800

C 1.01521300 -2.57693100 0.05607700

C -0.11883300 -1.32051600 1.76970100

C 0.51833700 -3.76304700 0.59264800

H 1.66536900 -2.60446400 -0.81480900

C -0.61537300 -2.50628800 2.31313800

H -0.37433600 -0.36609500 2.22133400

C -0.30606900 -3.73033400 1.72075800

H 0.77679000 -4.71404700 0.13470200

H -1.24758400 -2.47273600 3.19620600

H -0.69585200 -4.65423100 2.13866600

C 2.60950000 -0.00960500 -0.35115800

C 3.10189700 0.59406500 -1.51152000

C 3.52420100 -0.54332300 0.56734900

C 4.47544500 0.65390200 -1.75564400

H 2.39430400 1.01714700 -2.21532600

C 4.89536900 -0.47790900 0.32912400

H 3.15698700 -1.01754600 1.47276700

C 5.37784300 0.11863200 -0.83772600

H 4.83902000 1.12260400 -2.66650400

H 5.58802900 -0.89695400 1.05415900

H 6.44671900 0.16493900 -1.02744200

N 0.33603900 0.29784300 -1.23989900

H -1.06807900 1.50589600 -2.10694000

H 0.32399000 -0.47040900 -1.90442900

H 0.92235900 0.76835400 0.67336800

**Int1-O**

Zero-point correction= 0.315402 (Hartree/Particle)

Thermal correction to Energy= 0.358188

Thermal correction to Enthalpy= 0.359133

Thermal correction to Gibbs Free Energy= 0.226712

Sum of electronic and zero-point Energies= -1541.027268

Sum of electronic and thermal Energies= -1540.984482

Sum of electronic and thermal Enthalpies= -1540.983538

Sum of electronic and thermal Free Energies= -1541.115959

Ag 0.85724400 -0.21976400 1.26793600

N 0.75795200 -0.50265900 -1.96290600

N -0.47148000 -0.85272100 -1.51272100

N -1.41559400 -0.57471400 1.21637000

N -2.19070400 -0.15388400 0.19249800

N 0.02374300 1.79042000 -0.04415800

N -0.85533300 1.59039300 -1.05015000

B -1.55604700 0.22336400 -1.17724300

C 1.33539600 -1.62146100 -2.35904200

C 0.50452900 -2.73365400 -2.17258400

C -0.64337300 -2.18434800 -1.63805400

C -2.22521200 -0.87426500 2.21429300

C -3.56182100 -0.65847700 1.86652900

C -3.48289000 -0.19721800 0.56563600

C 0.45263200 3.02941500 -0.16606700

C -0.13162100 3.67738500 -1.26022100

C -0.96120200 2.70943000 -1.79316800

H -2.40238100 0.25607200 -2.01483000

Br -2.24868100 -3.07969400 -1.18868100

Br 0.85424900 -4.54905000 -2.56188700

Br 3.08630700 -1.61753900 -3.08884700

Br -2.08453800 2.87089100 -3.30389000

Br 0.13699500 5.44634900 -1.85862600

Br 1.72114600 3.73022400 1.06391100

Br -4.91671200 0.29775100 -0.55906600

Br -5.10492100 -0.93366500 2.91628700

Br -1.53187400 -1.49391400 3.86390200

C 2.95280500 -0.47332600 1.78991500

C 3.74856800 -1.58877800 1.35292700

C 3.16782400 -2.52804700 0.47161300

C 5.06663000 -1.82664300 1.81161800

C 3.89018200 -3.61389400 0.00573000

H 2.14050500 -2.37242300 0.14792300

C 5.77326300 -2.93769900 1.37883500

H 5.50959000 -1.15170600 2.53616500

C 5.19255000 -3.81937200 0.46471000

H 3.43827600 -4.30545600 -0.69778600

H 6.77553000 -3.12323800 1.75039300

H 5.75289400 -4.68398400 0.12192700

C 3.60914300 0.66788700 2.40162300

C 4.80069000 1.21698500 1.88250500

C 2.98308200 1.30930300 3.48811300

C 5.34105300 2.36851700 2.44054800

H 5.24295500 0.76917300 0.99772300

C 3.56794400 2.41581900 4.08827500

H 2.03861600 0.91493900 3.85539500

C 4.73972300 2.95528900 3.55503400

H 6.23491100 2.80876600 2.01067000

H 3.09274200 2.88311500 4.94450800

H 5.17549300 3.84522600 3.99852400

O 3.08744900 0.83556800 -0.63264900

H 2.92108700 1.70849600 -0.24467800

H 2.29154700 0.64621900 -1.16526500

**TS1-O**

Zero-point correction= 0.316544 (Hartree/Particle)

Thermal correction to Energy= 0.358729

Thermal correction to Enthalpy= 0.359673

Thermal correction to Gibbs Free Energy= 0.230020

Sum of electronic and zero-point Energies= -1541.017669

Sum of electronic and thermal Energies= -1540.975484

Sum of electronic and thermal Enthalpies= -1540.974540

Sum of electronic and thermal Free Energies= -1541.104192

Ag 0.72937500 -0.24943700 1.49401100

N 0.85384100 -0.67689300 -1.76773300

N -0.42410100 -0.90319800 -1.36974100

N -1.51626000 -0.38375000 1.31393600

N -2.17961900 0.02447400 0.20872300

N 0.20650900 1.80568800 -0.06562200

N -0.65951200 1.59168400 -1.07966100

B -1.44081200 0.26814200 -1.14124000

C 1.32352100 -1.84141300 -2.17947200

C 0.37369800 -2.86181700 -2.05477200

C -0.72699800 -2.20569600 -1.54111200

C -2.41623200 -0.56358900 2.26284900

C -3.70314800 -0.27735000 1.80073300

C -3.49546000 0.09467700 0.48533500

C 0.72891700 2.99643900 -0.27051000

C 0.22114600 3.59827600 -1.42802600

C -0.66467000 2.65437800 -1.91002000

H -2.24213700 0.29528100 -2.02165300

Br -2.43415000 -2.93066100 -1.17077800

Br 0.54061200 -4.69063300 -2.49193600

Br 3.09135500 -2.00334900 -2.84622200

Br -1.73435900 2.77887600 -3.46303600

Br 0.63573900 5.29043000 -2.15208000

Br 2.03576600 3.68685900 0.92727700

Br -4.80725800 0.62039100 -0.76679600

Br -5.33435100 -0.37870600 2.74188900

Br -1.88797200 -1.12590800 3.99095000

C 2.90997100 -0.43376800 1.58013000

C 3.56098200 -1.71293800 1.26627300

C 2.78576400 -2.73147700 0.68114200

C 4.90276500 -2.00030300 1.57854800

C 3.33297700 -3.96709400 0.36788900

H 1.73451500 -2.53801000 0.47376800

C 5.44851600 -3.24396300 1.28376100

H 5.51163100 -1.25590900 2.07903900

C 4.67048200 -4.22297900 0.66814200

H 2.71773100 -4.72977300 -0.09874600

H 6.48220200 -3.45321400 1.53954900

H 5.10149800 -5.19244900 0.43794400

C 3.69214600 0.61188100 2.27479100

C 4.90304400 1.13240500 1.78476200

C 3.17100200 1.13541300 3.46620100

C 5.56313100 2.14692300 2.46776200

H 5.29577700 0.75972300 0.84299900

C 3.85748000 2.11737400 4.17409700

H 2.21549200 0.76517400 3.83054200

C 5.04864100 2.63391900 3.66989600

H 6.48346900 2.55726500 2.06432100

H 3.44518100 2.50091500 5.10175300

H 5.57009600 3.42117400 4.20508600

O 3.09550800 0.43484600 -0.28266200

H 2.95990000 1.37537800 -0.06521700

H 2.30359300 0.18120800 -0.81446900

**Int2-O**

Zero-point correction= 0.317401 (Hartree/Particle)

Thermal correction to Energy= 0.358703

Thermal correction to Enthalpy= 0.359648

Thermal correction to Gibbs Free Energy= 0.232520

Sum of electronic and zero-point Energies= -1541.013649

Sum of electronic and thermal Energies= -1540.972347

Sum of electronic and thermal Enthalpies= -1540.971403

Sum of electronic and thermal Free Energies= -1541.098531

Ag 0.78767300 -0.08934000 1.58674000

N 1.14797000 -0.49961600 -1.64511800

N -0.06654200 -0.98384900 -1.26632400

N -1.38158800 -0.61212300 1.37930300

N -2.06202600 -0.43899800 0.22311000

N -0.05717000 1.85514200 -0.19611800

N -0.93201500 1.39986000 -1.11973300

B -1.34363500 -0.08135200 -1.11760200

C 1.85670000 -1.54181500 -2.05279700

C 1.13683700 -2.73333300 -1.94310000

C -0.08314300 -2.31979000 -1.44580900

C -2.26126200 -0.95022100 2.30365400

C -3.55288000 -1.00717300 1.77527700

C -3.37031400 -0.67138400 0.44644900

C 0.01850400 3.15773000 -0.37046000

C -0.80441300 3.59819900 -1.41256500

C -1.39480500 2.43155400 -1.85835500

H -2.09342300 -0.30006100 -2.01635200

Br -1.60356300 -3.39122000 -1.11039900

Br 1.68938800 -4.48244900 -2.37545800

Br 3.61971500 -1.33017300 -2.70446000

Br -2.64711000 2.25973000 -3.26305400

Br -1.04797400 5.35466000 -2.05513400

Br 1.20745800 4.17911600 0.70744100

Br -4.70624200 -0.55112400 -0.88229400

Br -5.16017700 -1.44317600 2.65969200

Br -1.70121000 -1.27688000 4.08082600

C 2.92176100 0.33526000 1.18510700

C 3.80228000 -0.85351800 0.87300100

C 3.26787100 -2.14488200 0.82728900

C 5.17048800 -0.69249300 0.61374600

C 4.06824300 -3.24631600 0.52806600

H 2.20748100 -2.28867700 1.03027300

C 5.97241200 -1.78557100 0.30781400

H 5.60779200 0.30098700 0.65996200

C 5.42232100 -3.06668200 0.26473100

H 3.63179500 -4.23987000 0.50208500

H 7.03009300 -1.64096200 0.11002400

H 6.04962100 -3.92141700 0.03149600

C 3.58301100 1.34083900 2.08335400

C 4.32654200 2.43737500 1.62756000

C 3.46587700 1.15207100 3.46764400

C 4.91056600 3.32793700 2.52877500

H 4.46317200 2.60233500 0.56212900

C 4.06993000 2.02358800 4.36406600

H 2.88101100 0.31079700 3.83365800

C 4.78783700 3.12552700 3.89851700

H 5.47360100 4.17616100 2.15099700

H 3.96372800 1.85444400 5.43110700

H 5.24415200 3.81790900 4.59837600

O 2.81725600 1.08999400 -0.22079600

H 2.37631100 1.94604000 -0.02397900

H 2.13757400 0.57686800 -0.79040800

**Int3-O**

Zero-point correction= 0.368592 (Hartree/Particle)

Thermal correction to Energy= 0.411116

Thermal correction to Enthalpy= 0.412060

Thermal correction to Gibbs Free Energy= 0.288950

Sum of electronic and zero-point Energies= -1693.841518

Sum of electronic and thermal Energies= -1693.798995

Sum of electronic and thermal Enthalpies= -1693.798051

Sum of electronic and thermal Free Energies= -1693.921161

Ag 0.25805100 1.24929400 -0.40924600

N -1.75528700 0.39250500 -0.70108300

N -1.99476400 -0.93265000 -0.46224600

N 0.62686100 -1.16791000 -1.43549100

N 0.25561000 -2.04759200 -0.45327500

N 0.68955600 -0.72182400 1.95371100

N -0.61909300 -0.95939400 1.64792400

B -1.00932300 -1.78458800 0.37801200

C -2.72896900 0.81967000 -1.49715400

C -3.63335600 -0.20717000 -1.79274800

C -3.11899700 -1.30473000 -1.11216100

C 1.77191500 -1.61785500 -1.92213200

C 2.18652600 -2.79454700 -1.27233800

C 1.18552200 -3.02373300 -0.33883600

C 0.68207700 -0.09191000 3.11743600

C -0.62439600 0.11480500 3.60226700

C -1.42069700 -0.47339600 2.62272900

H -1.53945200 -2.80132000 0.69979400

Br -3.84198300 -3.05717700 -1.04919000

Br -5.20355800 -0.12010100 -2.85928500

Br -2.75979300 2.61667100 -2.13722100

Br -3.31499100 -0.62866500 2.58388900

Br -1.17995100 0.90840300 5.24252900

Br 2.32882100 0.45163500 3.93708800

Br 1.06745300 -4.42025100 0.94607200

Br 3.74416700 -3.83955200 -1.59568400

Br 2.65026500 -0.68366000 -3.33333100

C 2.06827800 2.39047200 -0.14338600

C 1.91182300 3.66046800 -0.91457500

C 1.90214800 4.93864400 -0.33341300

C 1.68524300 3.56297300 -2.30319700

C 1.63639600 6.07608500 -1.10905700

H 2.10905800 5.05184600 0.72488000

C 1.44051200 4.69513700 -3.07119300

H 1.68568300 2.58052600 -2.76861500

C 1.39926500 5.96294500 -2.47693600

H 1.62494700 7.05218900 -0.63177700

H 1.26767800 4.58813800 -4.13840400

H 1.19081000 6.84457300 -3.07498600

C 3.32029800 1.59774300 -0.40765300

C 4.39390400 2.11836000 -1.14584900

C 3.44546300 0.30910000 0.14239200

C 5.55148100 1.36555600 -1.34164000

H 4.31825100 3.11111200 -1.57631200

C 4.61435800 -0.42939200 -0.02852300

H 2.60778200 -0.13029100 0.67572700

C 5.66857800 0.09295100 -0.77961800

H 6.36839300 1.77969100 -1.92610700

H 4.68577000 -1.42521900 0.39730900

H 6.57107400 -0.49147700 -0.93308500

H 1.23906100 2.90645300 1.81859200

O -1.13878800 4.46629400 0.37871000

H -0.33337400 4.80182200 -0.06327600

H -1.52649800 3.84762000 -0.26471700

O -0.02998300 3.10176900 2.36617900

H -0.47033200 2.24454200 2.50977900

H -0.55738900 3.59671000 1.66705000

O 2.21626000 2.81812000 1.36459900

H 2.68736200 2.08914000 1.81915100

**Int4-O**

Zero-point correction= 0.256301 (Hartree/Particle)

Thermal correction to Energy= 0.271414

Thermal correction to Enthalpy= 0.272359

Thermal correction to Gibbs Free Energy= 0.214360

Sum of electronic and zero-point Energies= -730.082101

Sum of electronic and thermal Energies= -730.066987

Sum of electronic and thermal Enthalpies= -730.066043

Sum of electronic and thermal Free Energies= -730.125342

C 0.13744900 0.51830700 -0.06612800

C -1.03791500 -0.34582900 -0.12919500

C -2.07448200 -0.21167100 -1.08213000

C -1.23726800 -1.31493200 0.88732700

C -3.23018200 -0.99635400 -1.02434900

H -1.97625700 0.48863600 -1.90862700

C -2.38179900 -2.09739800 0.93237600

H -0.47693300 -1.42963800 1.65439000

C -3.39765600 -1.94501700 -0.02070100

H -3.99794000 -0.86346900 -1.78276600

H -2.49257200 -2.82885700 1.72895600

H -4.29677600 -2.55139300 0.02596700

C 1.51652100 0.00395600 -0.08015200

C 1.82071100 -1.37102300 -0.04834800

C 2.60082300 0.90777400 -0.11472500

C 3.14115600 -1.81689400 -0.02371200

H 1.01496700 -2.09711700 -0.05463700

C 3.91632500 0.45785600 -0.11622100

H 2.39508900 1.97360200 -0.13581100

C 4.19971500 -0.90969800 -0.06116700

H 3.34095900 -2.88526100 0.00363100

H 4.72789400 1.18057300 -0.14585300

H 5.22788900 -1.25969700 -0.04814200

H -0.85943000 2.23751900 -0.83418300

O -0.72978700 2.21628900 1.95100000

H -0.24658400 1.52266200 1.34660600

H -1.26333300 1.67170200 2.55130900

O -1.91094600 2.82459500 -0.24769700

H -2.61123300 2.14959300 -0.31836500

H -1.58048900 2.74198100 0.72367600

O 0.04409300 1.63107300 -1.09178600

H 0.02747600 1.29903900 -2.01552000

**TS2-O**

Zero-point correction= 0.362435 (Hartree/Particle)

Thermal correction to Energy= 0.408403

Thermal correction to Enthalpy= 0.409347

Thermal correction to Gibbs Free Energy= 0.274349

Sum of electronic and zero-point Energies= -1693.822239

Sum of electronic and thermal Energies= -1693.776271

Sum of electronic and thermal Enthalpies= -1693.775327

Sum of electronic and thermal Free Energies= -1693.910325

Ag 0.88207500 1.08193500 -0.03274700

N -1.46028100 1.27521000 -0.33375900

N -2.10022100 0.15964700 -0.80181900

N 0.49371300 -0.47196500 -1.73977500

N -0.28925100 -1.51338800 -1.31561600

N 0.07761200 -1.59906700 1.44246900

N -1.19248700 -1.31388500 1.02997400

B -1.55903700 -1.25340100 -0.48084200

C -2.12800700 2.31585200 -0.81522800

C -3.21837900 1.91825400 -1.59858100

C -3.15463200 0.53011800 -1.56209900

C 1.48510100 -1.00607900 -2.44537900

C 1.38819500 -2.40357900 -2.48282200

C 0.24110000 -2.67696700 -1.74570500

C 0.01249600 -1.72169400 2.76094900

C -1.29283900 -1.50358500 3.24747400

C -2.02606500 -1.25273700 2.09184100

H -2.39581600 -2.06235300 -0.73085500

Br -4.33318400 -0.69608900 -2.40422000

Br -4.49644300 3.01105500 -2.48457900

Br -1.56347200 4.10606600 -0.44096900

Br -3.88440700 -0.88920900 1.92373100

Br -1.93265900 -1.60345000 5.03794400

Br 1.56894000 -2.14993300 3.78791600

Br -0.51641700 -4.36938800 -1.33772900

Br 2.55461300 -3.64137600 -3.33195200

Br 2.77717400 0.11395300 -3.27129800

C 2.78106000 1.69167000 1.20688000

C 3.39086800 3.07103700 1.07605200

C 4.15551500 3.64298500 2.09526300

C 3.18958700 3.79660500 -0.10678400

C 4.71914500 4.91017200 1.93055700

H 4.29352000 3.09840600 3.02293800

C 3.76216800 5.05432000 -0.27903500

H 2.57933100 3.36199200 -0.89785500

C 4.52999100 5.61852800 0.74419800

H 5.30684500 5.34416900 2.73495800

H 3.60053900 5.59873500 -1.20535300

H 4.96701300 6.60492500 0.61900500

C 3.60544600 0.63329200 0.46781600

C 4.77192300 0.95229500 -0.24559200

C 3.25374100 -0.72697400 0.58066100

C 5.54491200 -0.04967700 -0.83547400

H 5.07983500 1.98587300 -0.34356000

C 4.02082600 -1.72324100 -0.01765000

H 2.35354800 -1.00796300 1.11303800

C 5.17457300 -1.38954800 -0.73021800

H 6.44327100 0.22530800 -1.38132200

H 3.70687700 -2.75949900 0.06768200

H 5.77223600 -2.16452600 -1.20068800

H 1.15476000 1.07374100 3.50484700

O 0.65831900 3.19461400 2.04432800

H 1.35917600 2.44592100 1.38204500

H -0.07789500 3.47490500 1.46373700

O 0.23658600 1.36236800 3.73144100

H -0.34361100 0.62918500 3.46220800

H 0.29345100 2.54826700 2.76414300

O 2.70044800 1.27416600 2.60373900

H 3.44272500 0.67063700 2.77961500

**TS2-O'**

Zero-point correction= 0.255753 (Hartree/Particle)

Thermal correction to Energy= 0.270718

Thermal correction to Enthalpy= 0.271662

Thermal correction to Gibbs Free Energy= 0.213975

Sum of electronic and zero-point Energies= -730.081925

Sum of electronic and thermal Energies= -730.066960

Sum of electronic and thermal Enthalpies= -730.066016

Sum of electronic and thermal Free Energies= -730.122203

C 0.13598400 0.52320700 -0.06975800

C -1.04104500 -0.34197100 -0.13109600

C -2.07719800 -0.20446100 -1.08378500

C -1.24397200 -1.30877300 0.88643500

C -3.23651100 -0.98393400 -1.02478000

H -1.97350200 0.49340000 -1.91168000

C -2.39187300 -2.08647800 0.93296800

H -0.48379300 -1.42591100 1.65334700

C -3.40749500 -1.93058200 -0.01974900

H -4.00391600 -0.84910500 -1.78323500

H -2.50556400 -2.81665400 1.73032500

H -4.30912500 -2.53318200 0.02797500

C 1.51383700 0.00164900 -0.08243600

C 1.81344100 -1.37401000 -0.04802100

C 2.60087800 0.90176100 -0.11943100

C 3.13248200 -1.82431800 -0.02330000

H 1.00546300 -2.09765000 -0.05304400

C 3.91503000 0.44764200 -0.11943700

H 2.39817600 1.96805500 -0.14408600

C 4.19400300 -0.92068900 -0.06202400

H 3.32875500 -2.89331700 0.00554200

H 4.72895500 1.16767300 -0.15059500

H 5.22103800 -1.27406800 -0.04862900

H -0.89281400 2.25948400 -0.80842300

O -0.70171800 2.20770000 1.93267700

H -0.22642200 1.50007300 1.31630900

H -1.22821500 1.67106800 2.54646300

O -1.89090600 2.81441500 -0.22733700

H -2.59490700 2.14263400 -0.30187500

H -1.54590800 2.71847000 0.75089800

O 0.04208400 1.63642900 -1.08465300

H 0.04073600 1.30641200 -2.00831200

**33'**

Zero-point correction= 0.211836 (Hartree/Particle)

Thermal correction to Energy= 0.223135

Thermal correction to Enthalpy= 0.224079

Thermal correction to Gibbs Free Energy= 0.174247

Sum of electronic and zero-point Energies= -577.342167

Sum of electronic and thermal Energies= -577.330868

Sum of electronic and thermal Enthalpies= -577.329924

Sum of electronic and thermal Free Energies= -577.379756

C -0.03221400 1.17384400 -0.11859500

C 1.29065600 0.45413400 -0.08686900

C 1.67610000 -0.27149400 1.04745700

C 2.15842300 0.53195200 -1.17961300

C 2.90027700 -0.93640600 1.07358400

H 1.01468700 -0.30379700 1.90766000

C 3.38525700 -0.13488300 -1.15384200

H 1.88006900 1.12922900 -2.04222800

C 3.75486700 -0.87512100 -0.03064300

H 3.19079900 -1.49910400 1.95623800

H 4.05419700 -0.06542100 -2.00693800

H 4.70946500 -1.39314600 -0.00894300

C -1.28724600 0.31427600 -0.10605400

C -1.26867000 -1.08081500 -0.03520800

C -2.52453400 0.96834800 -0.21120600

C -2.46369800 -1.80341100 -0.05038200

H -0.32124500 -1.60475100 0.01643700

C -3.71756000 0.24940600 -0.22194700

H -2.56080300 2.04731200 -0.32671000

C -3.68944300 -1.14378000 -0.13788900

H -2.43318400 -2.88797000 -0.00185600

H -4.66355100 0.77494700 -0.31519600

H -4.61506300 -1.71088900 -0.15957700

H -0.06848200 1.77984800 -1.03820000

O -0.03962900 2.09053300 1.01168500

H -0.96314200 2.33319000 1.19307700

1. **NMR Spectra of Product**


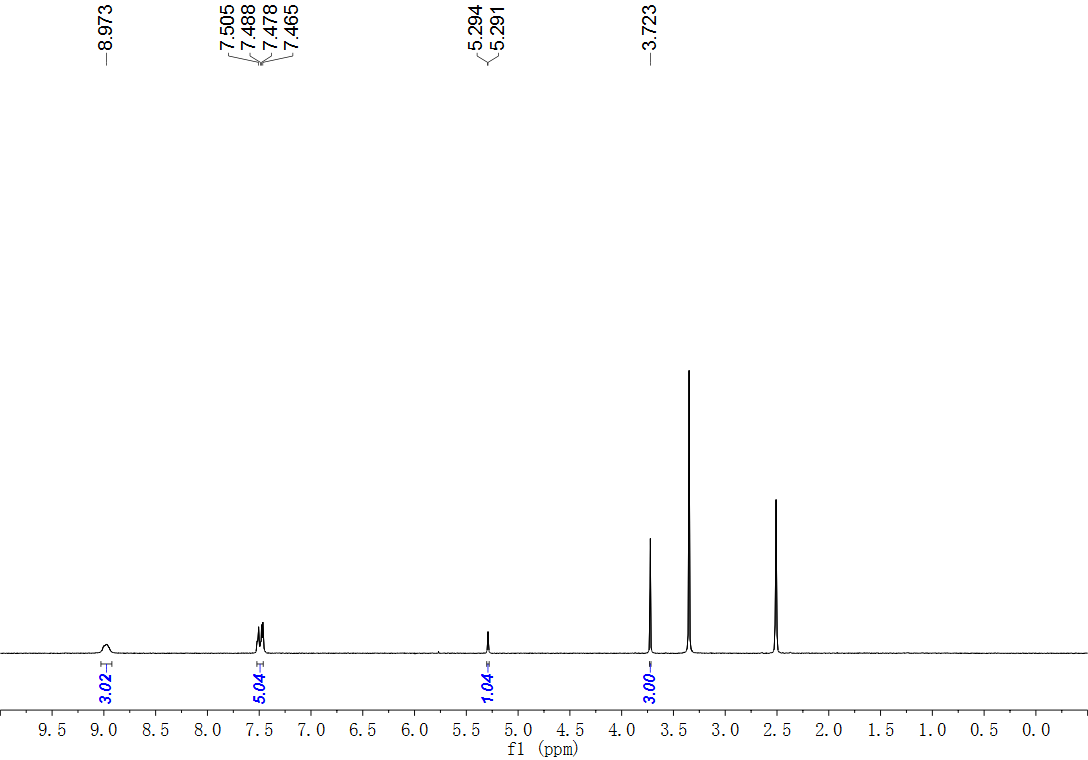


**Fig. S7.** 1H NMR (500 MHz, DMSO) spectrum of compound **2**


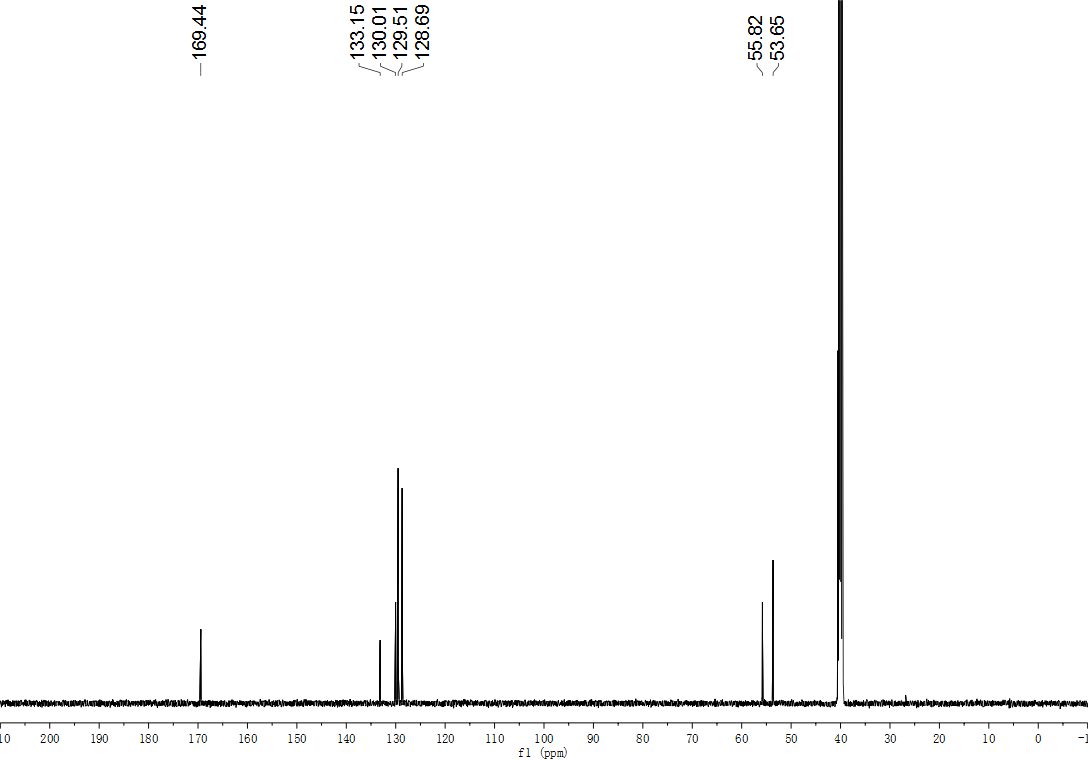


**Fig. S8.** 13C NMR (126 MHz, DMSO) spectrum of compound **2**


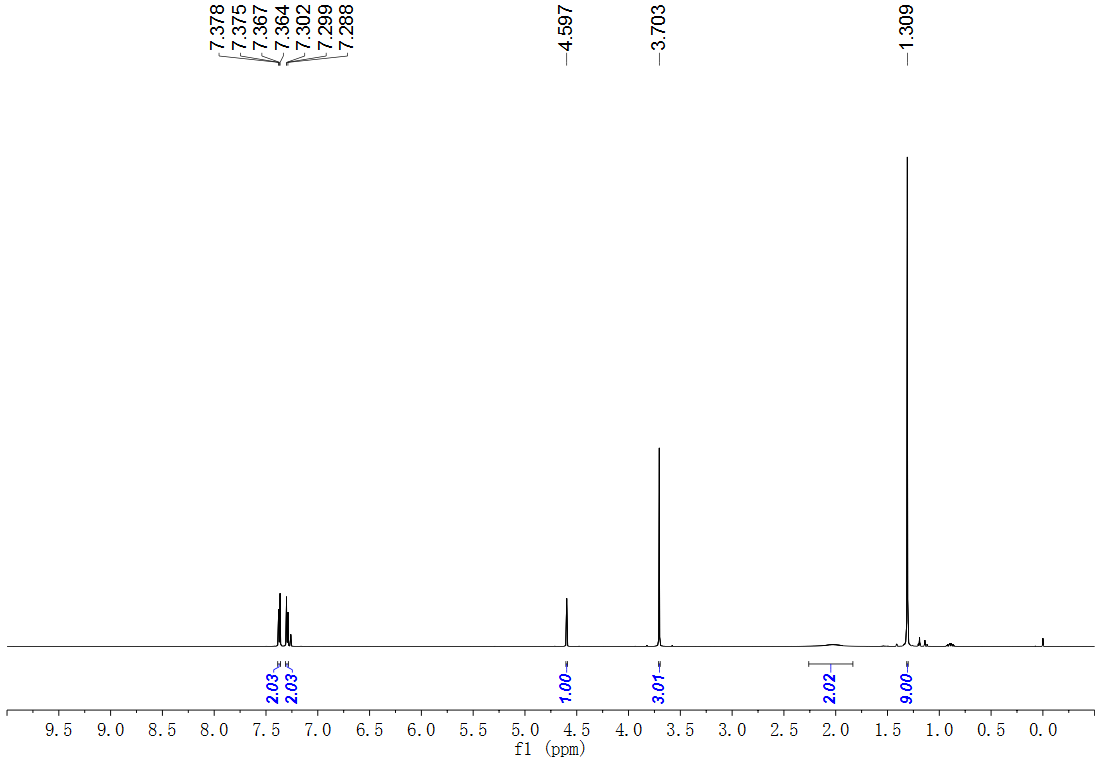


**Fig. S9.** 1H NMR (600 MHz, CDCl3) spectrum of compound **4**.


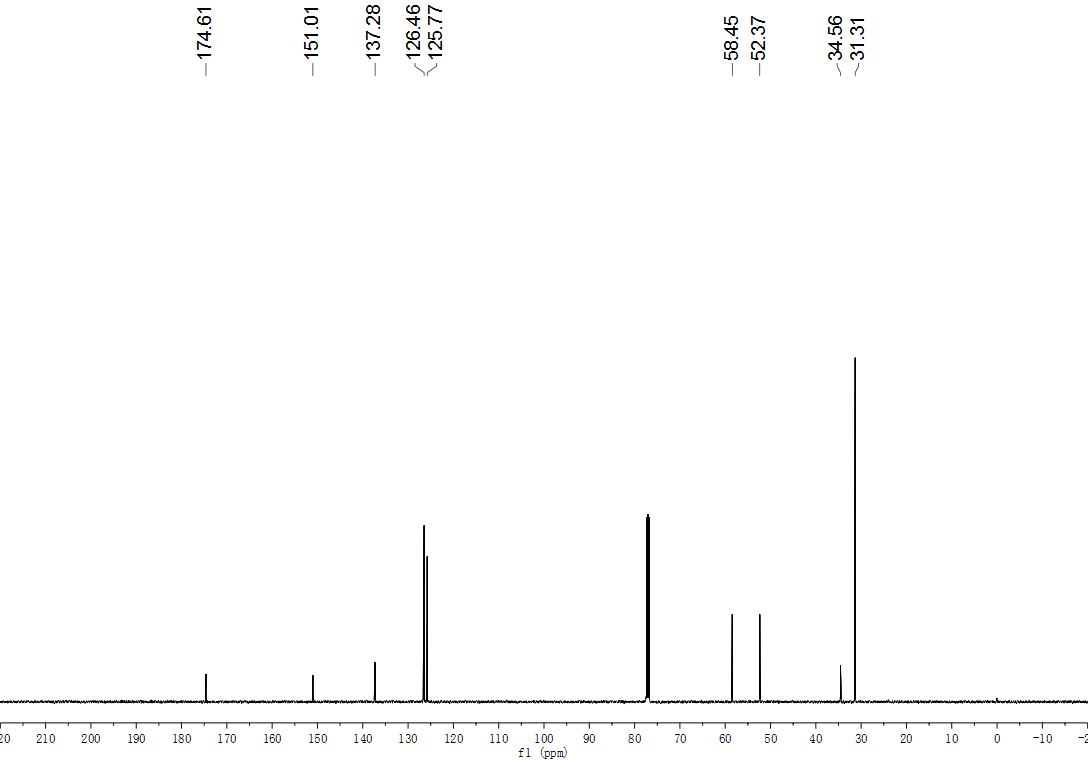


**Fig. S10.** 13C NMR (126 MHz, CDCl3) spectrum of compound **4**.


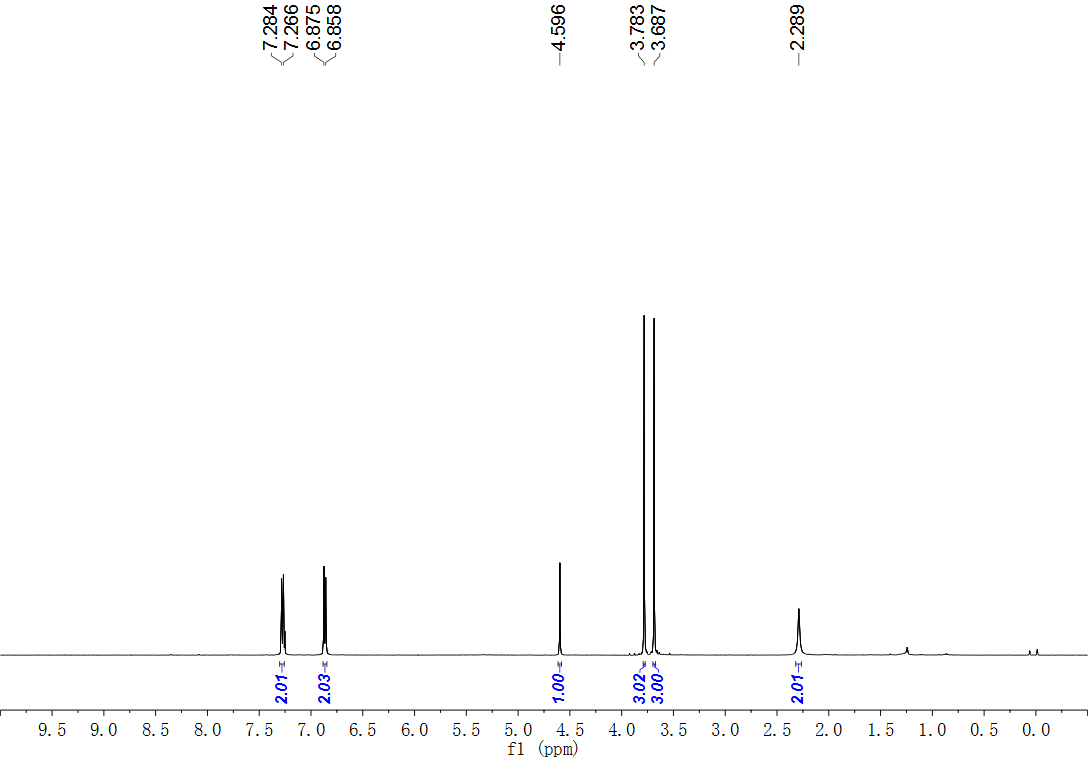


**Fig. S11.** 1H NMR (500 MHz, CDCl3) spectrum of compound **5**.


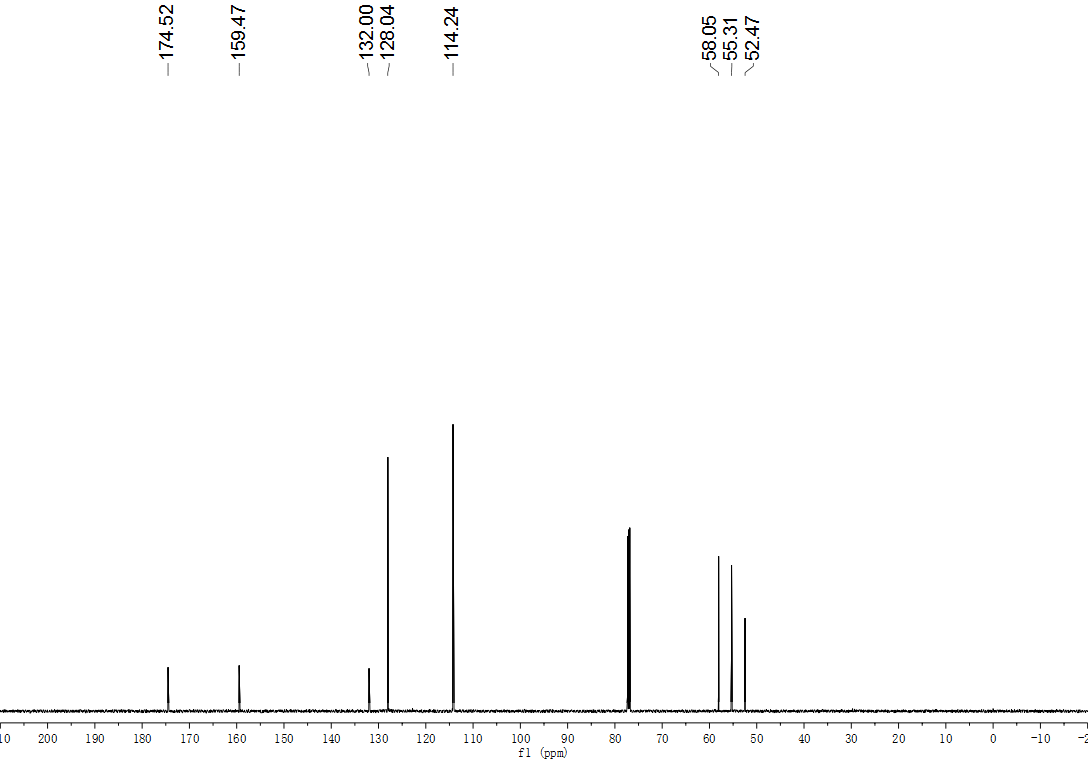


**Fig. S12.** 13C NMR (151 MHz, CDCl3) spectrum of compound **5**.


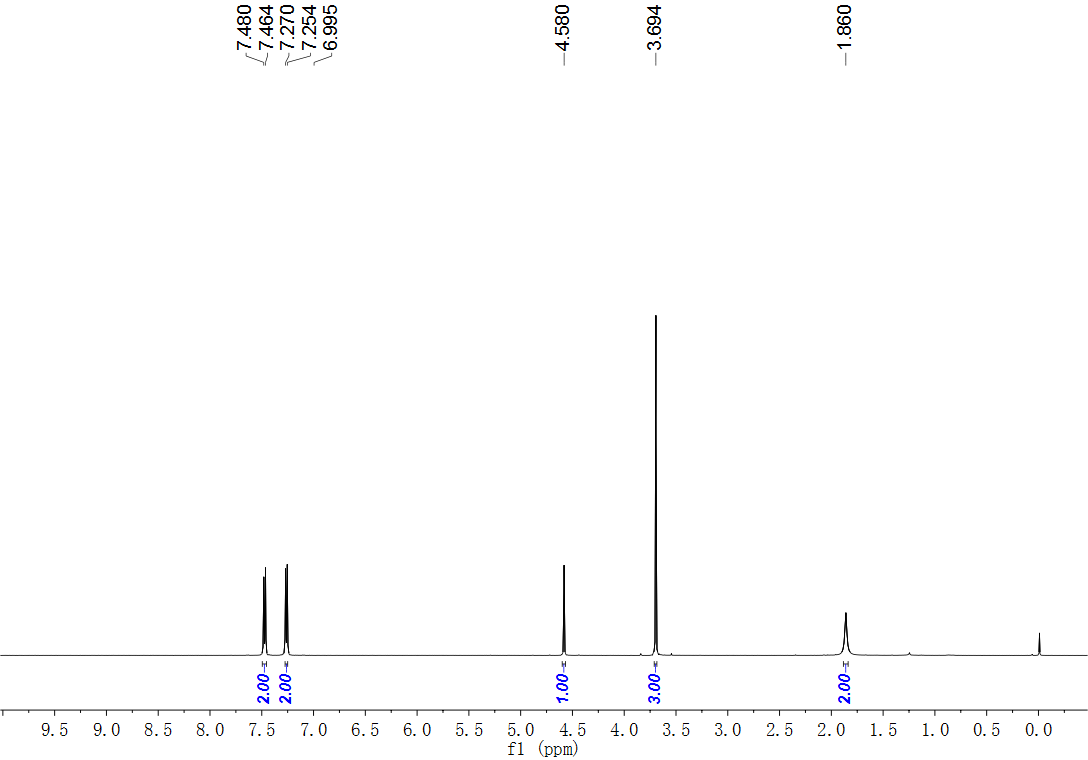


**Fig. S13.** 1H NMR (500 MHz, CDCl3) spectrum of compound **6**.


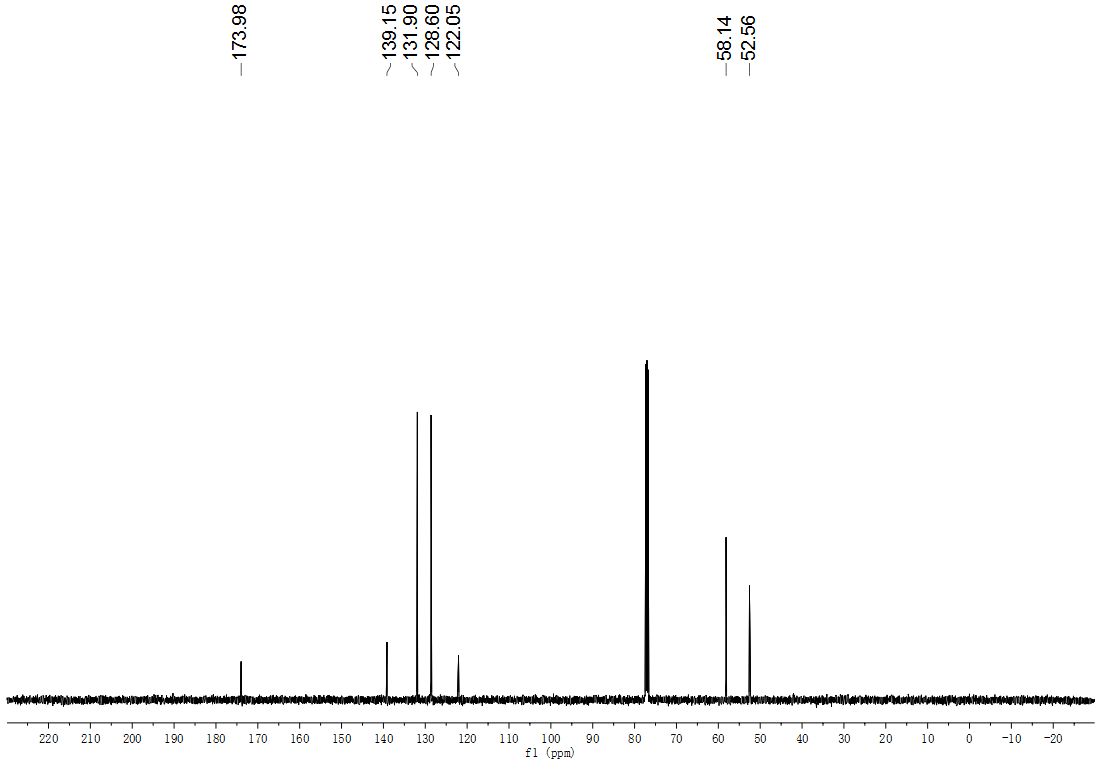


**Fig. S14.** 13C NMR (126 MHz, CDCl3) spectrum of compound **6**.


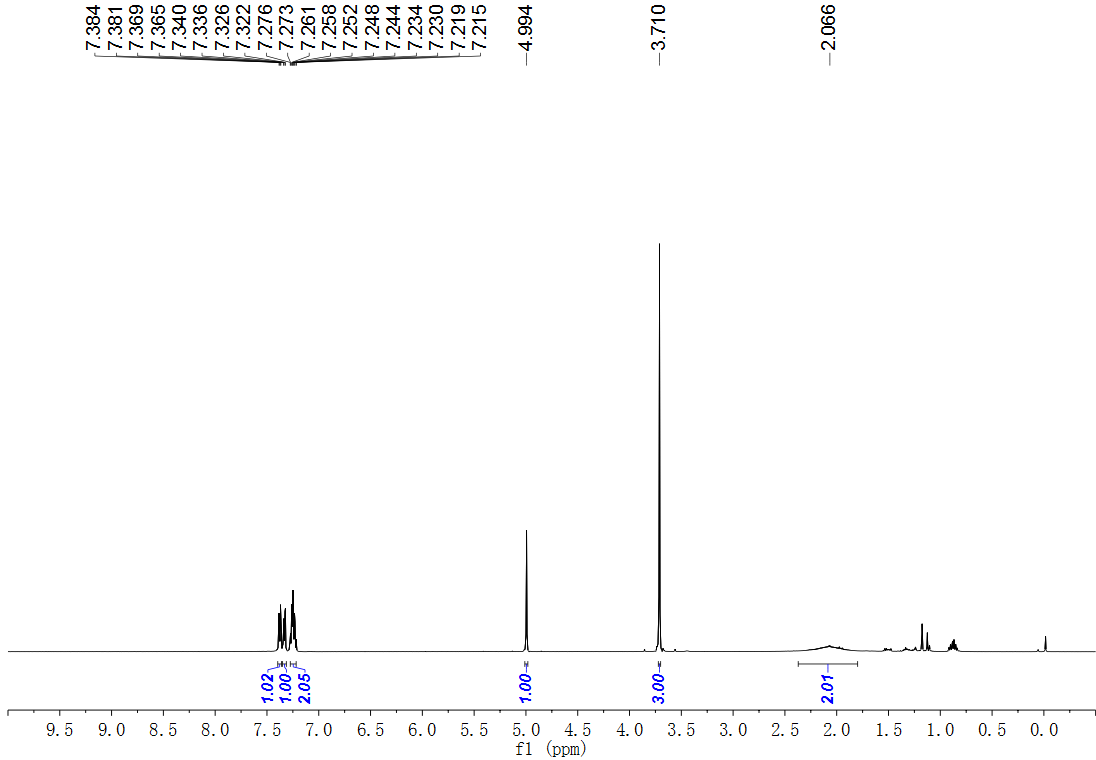


**Fig. S15.** 1H NMR (500 MHz, CDCl3) spectrum of compound **7**.


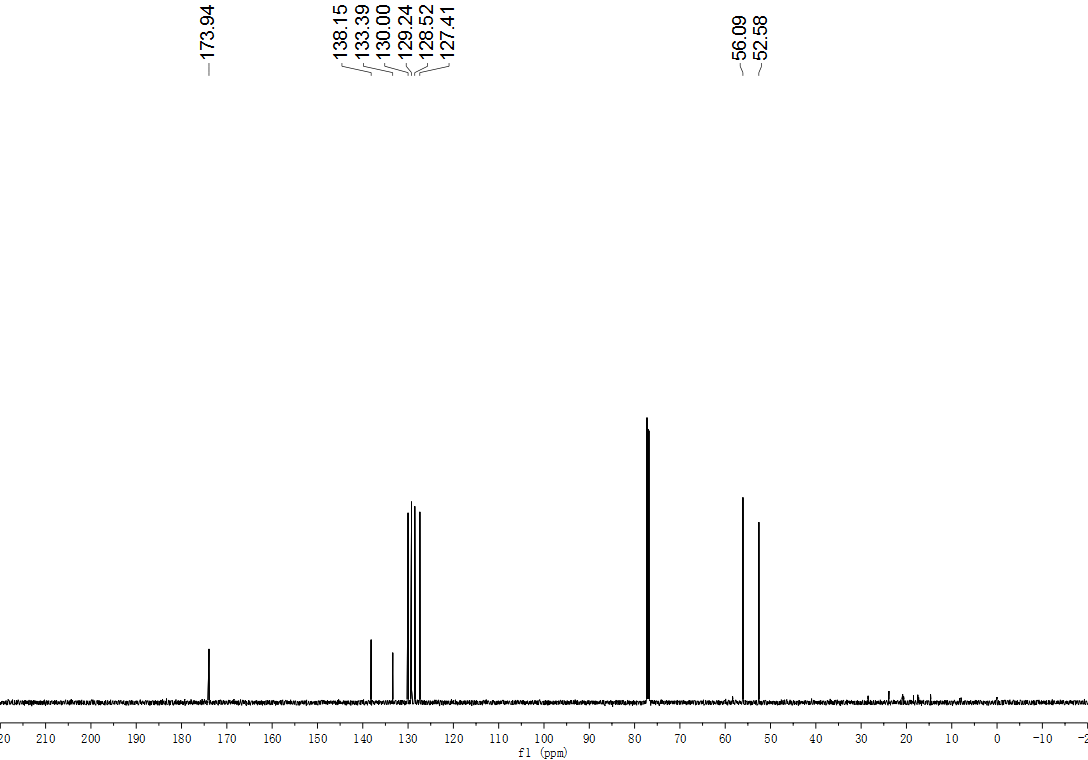


**Fig. S16.** 13C NMR (151 MHz, CDCl3) spectrum of compound **7**.


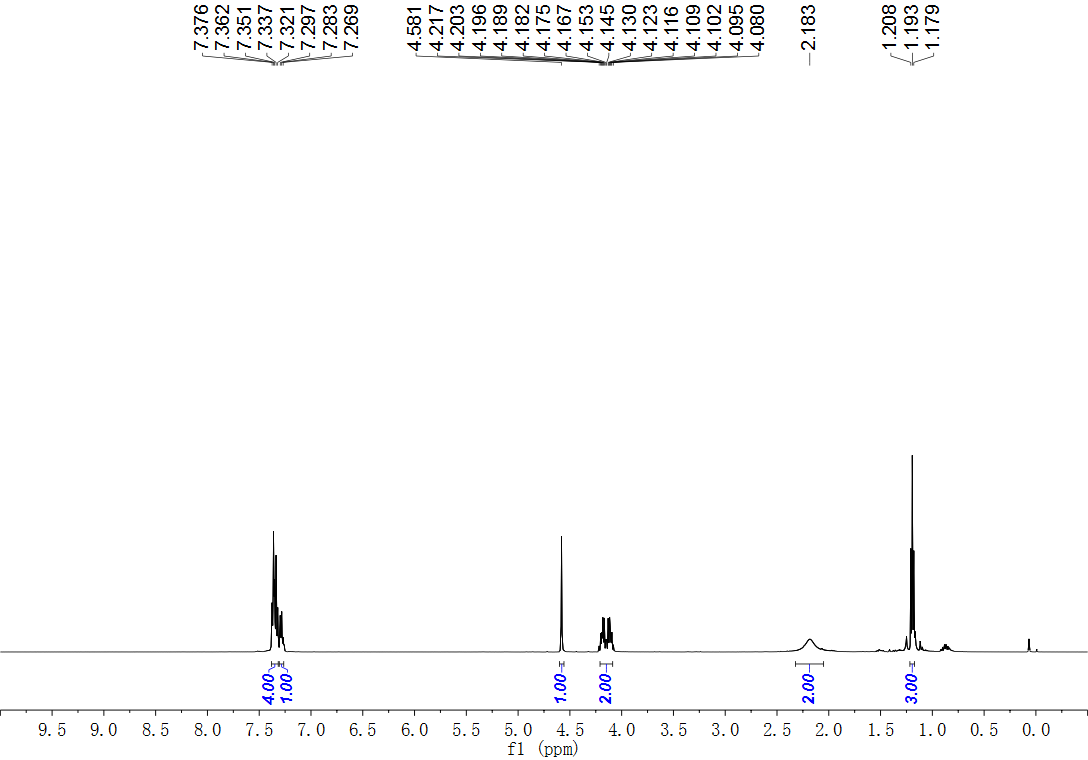


**Fig. S17.** 1H NMR (500 MHz, CDCl3) spectrum of compound **8**.


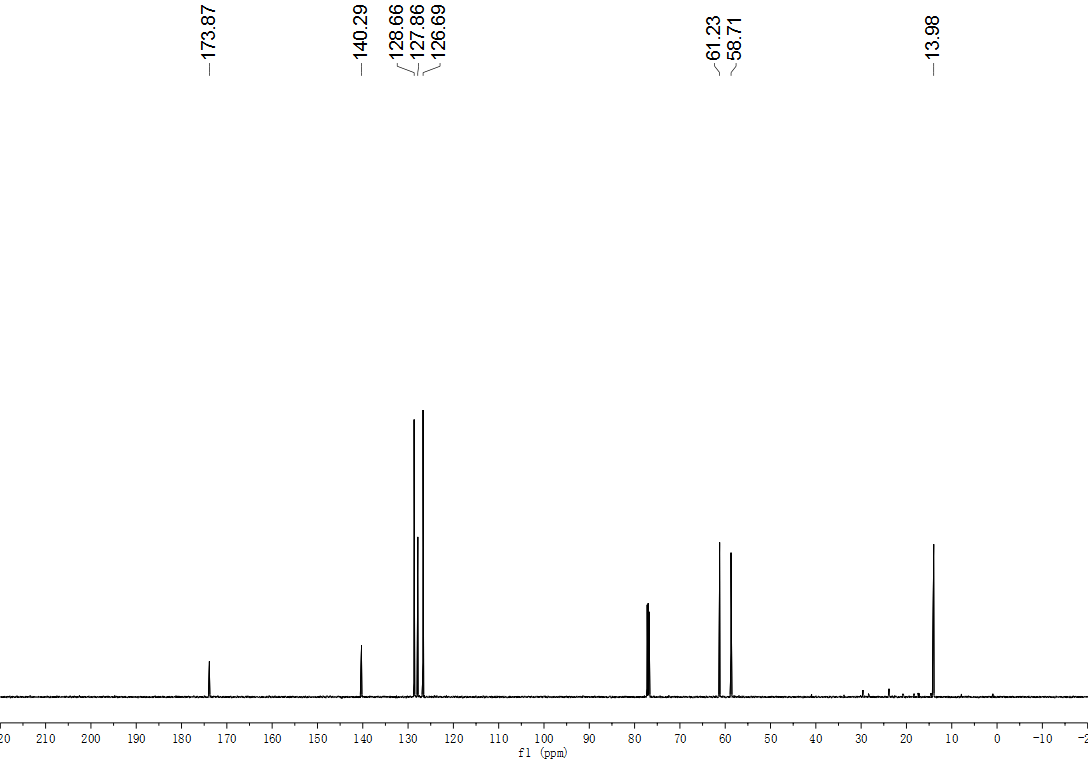


**Fig. S18.** 13C NMR (126 MHz, CDCl3) spectrum of compound **8**.


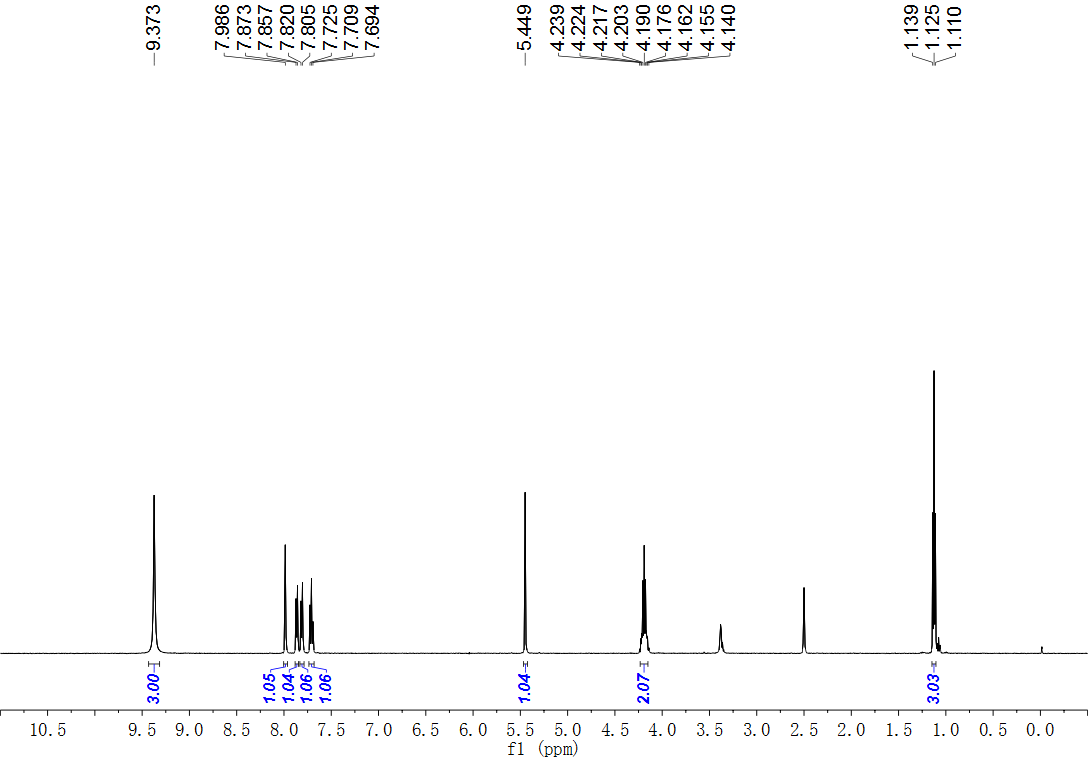


**Fig. S19.** 1H NMR (500 MHz, DMSO) spectrum of compound **9**.


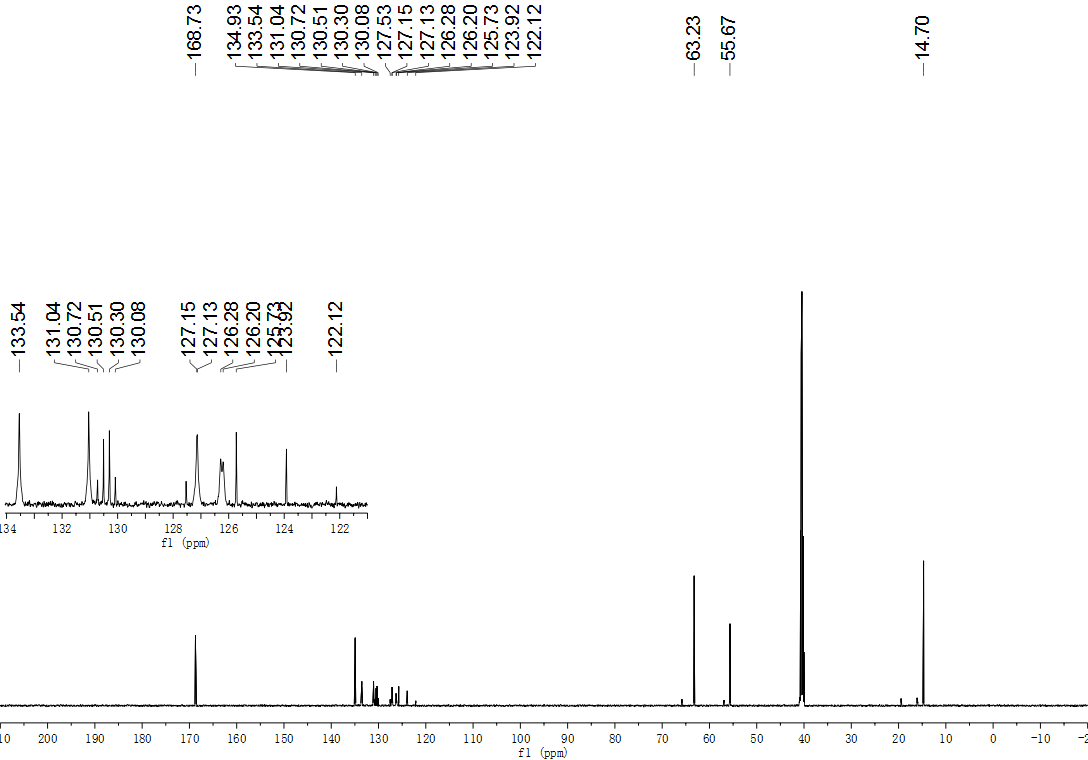


**Fig. S20.** 13C NMR (151 MHz, DMSO) spectrum of compound **9**.


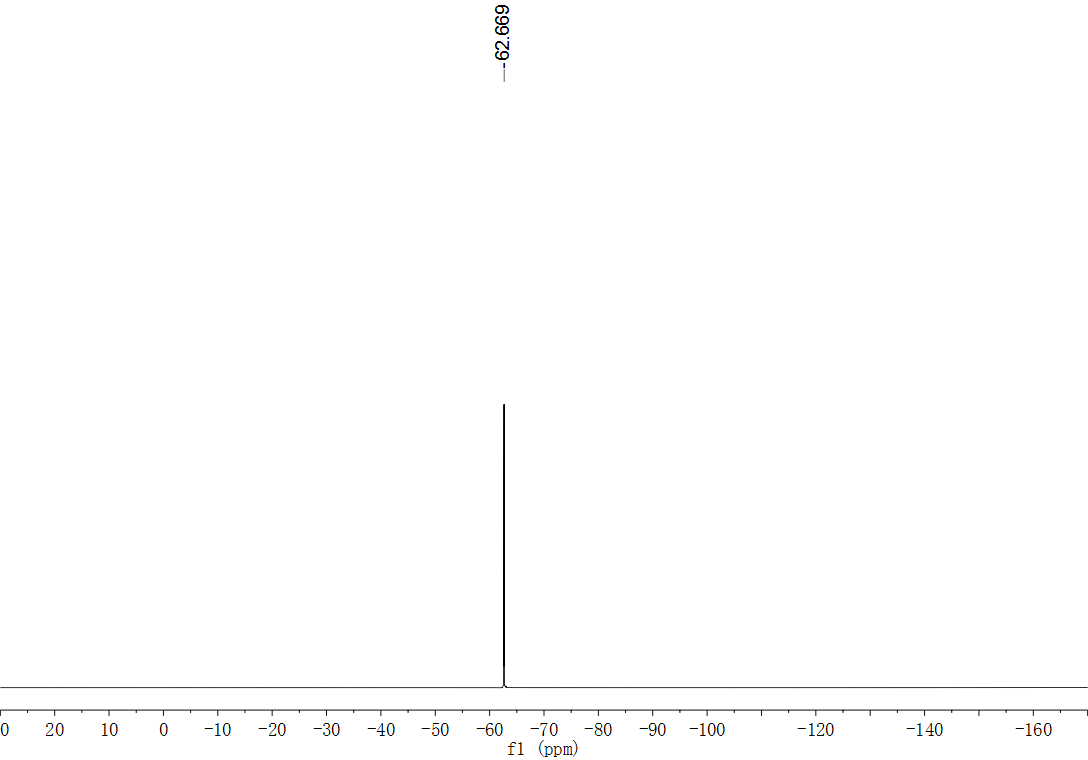


**Fig. S21.** 19F NMR (565 MHz, DMSO) spectrum of compound **9**.


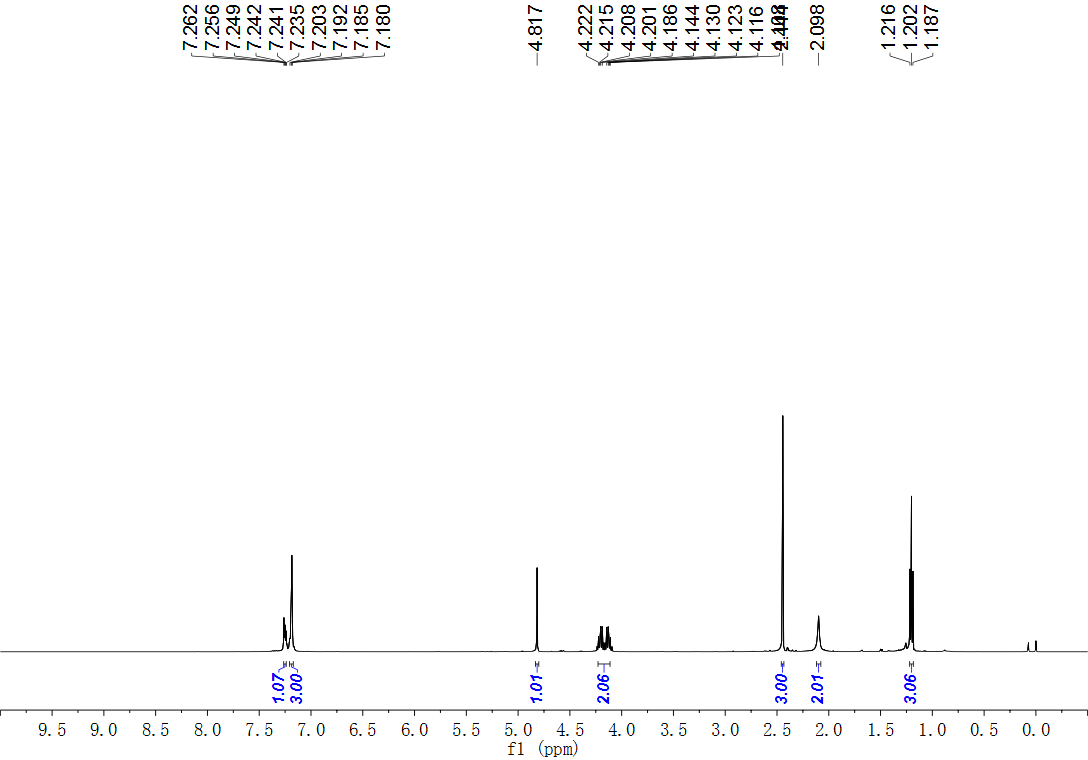


**Fig. S22.** 1H NMR (500 MHz, CDCl3) spectrum of compound **10**.


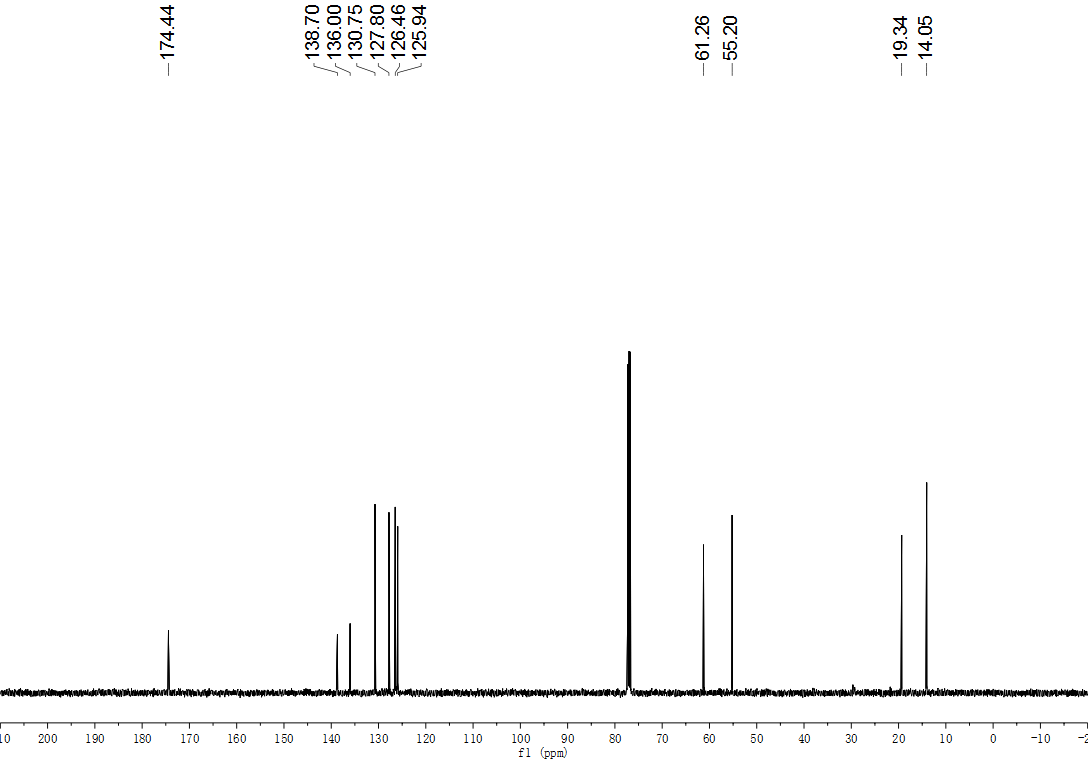


**Fig. S23.** 13C NMR (126 MHz, CDCl3) spectrum of compound **10**.


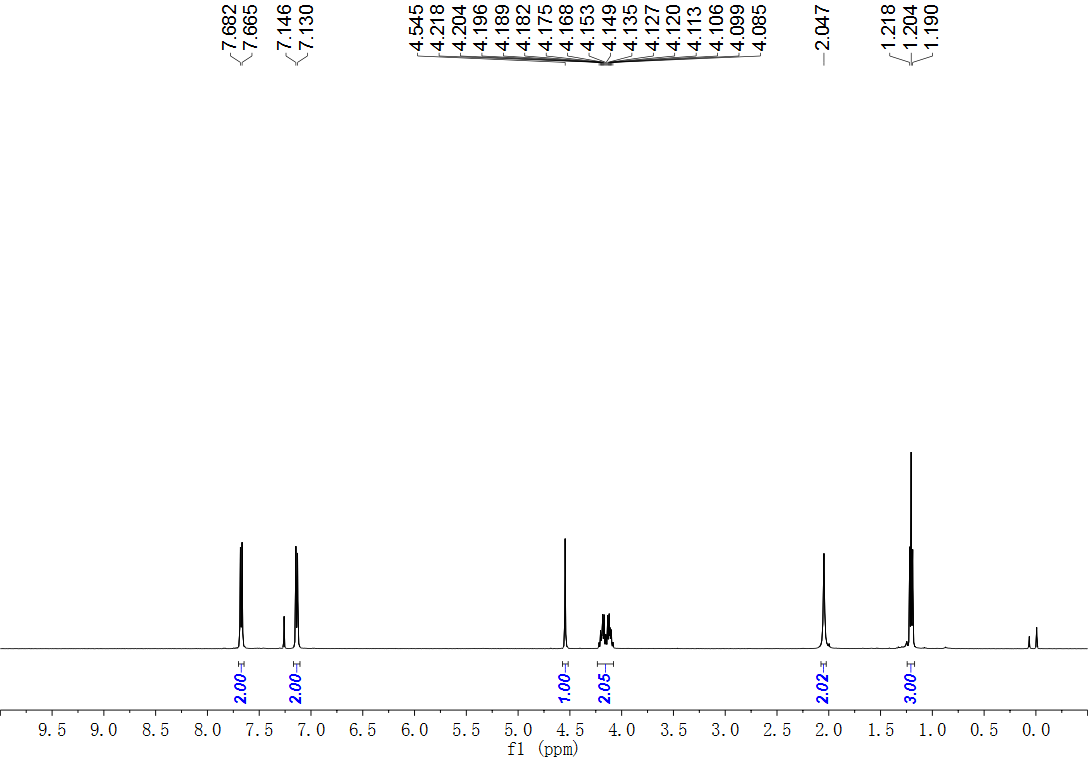


**Fig. S24.** 1H NMR (500 MHz, CDCl3) spectrum of compound **11**.


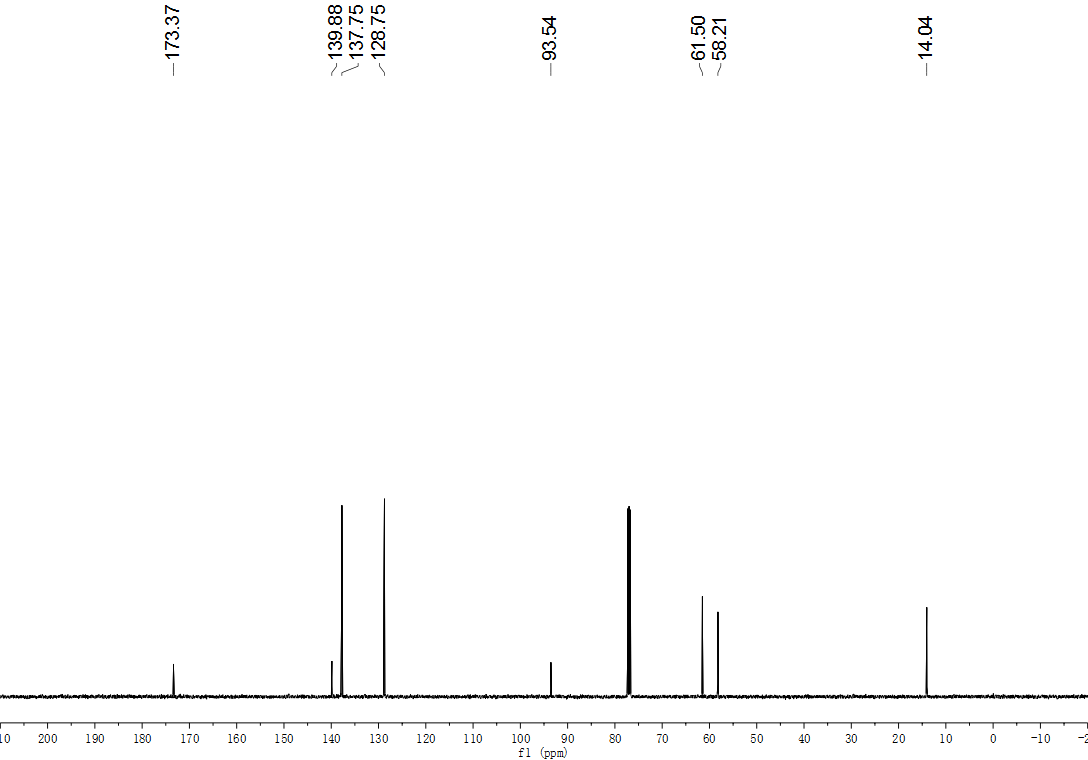


**Fig. S25.** 13C NMR (126 MHz, CDCl3) spectrum of compound **11**.


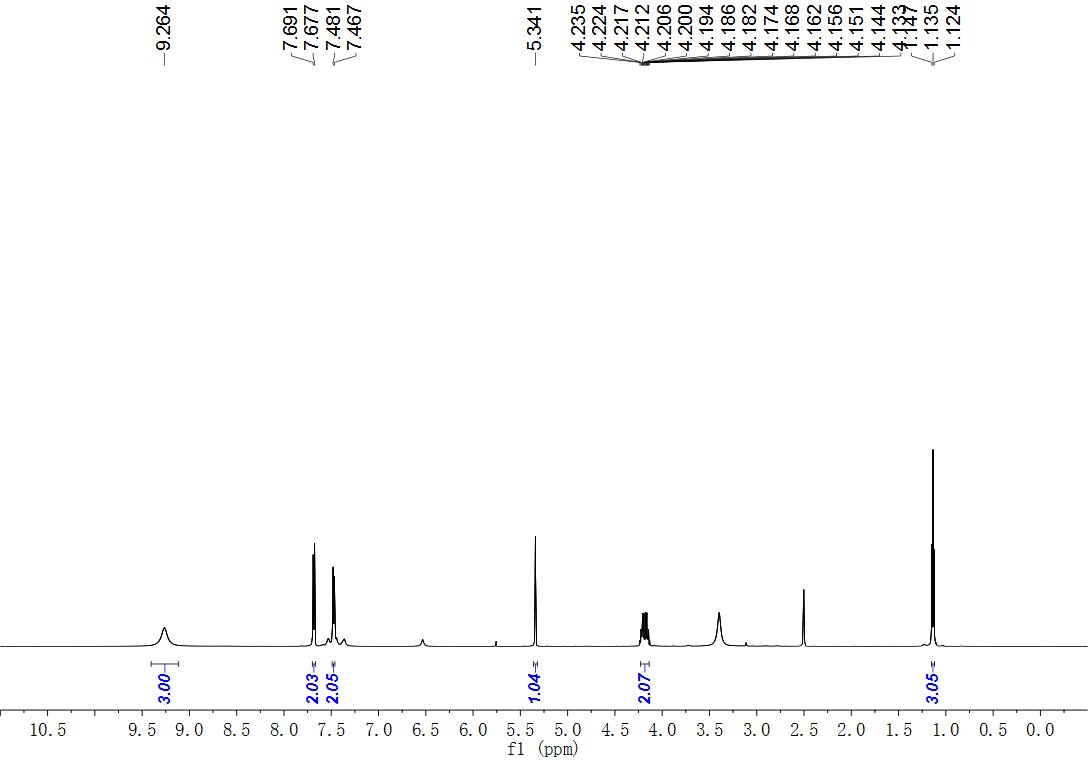


**Fig. S26.** 1H NMR (600 MHz, DMSO) spectrum of compound **12**.


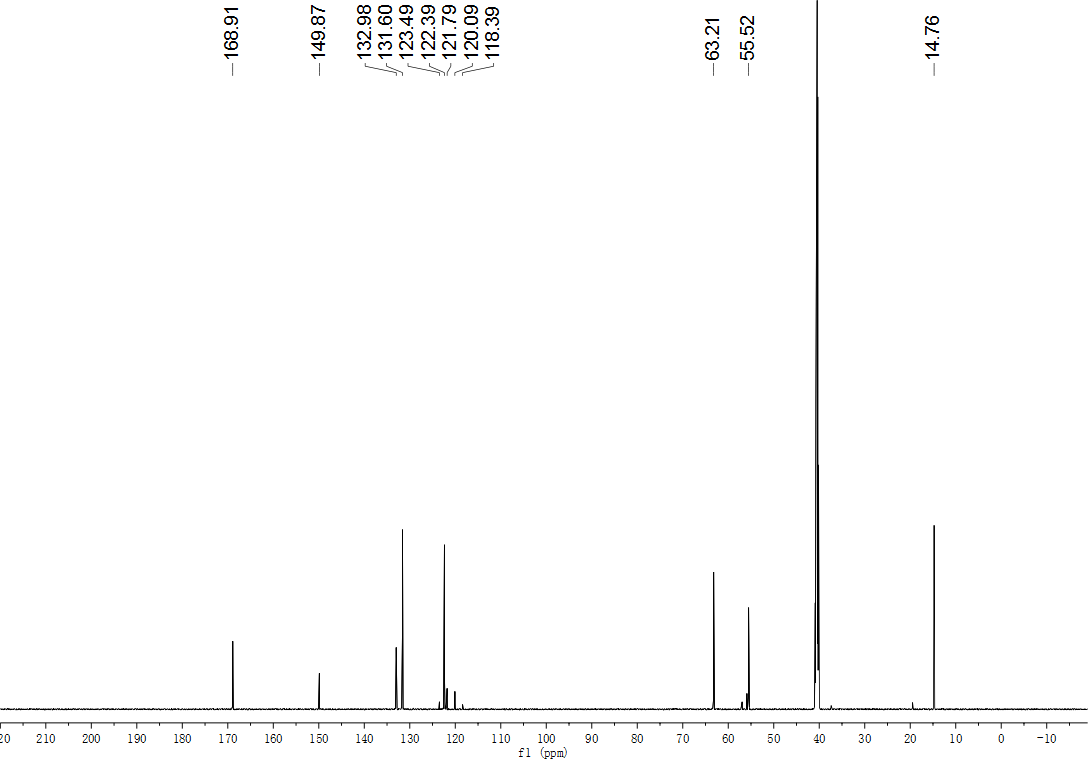


**Fig. S27.** 13C NMR (151 MHz, DMSO) spectrum of compound **12**.


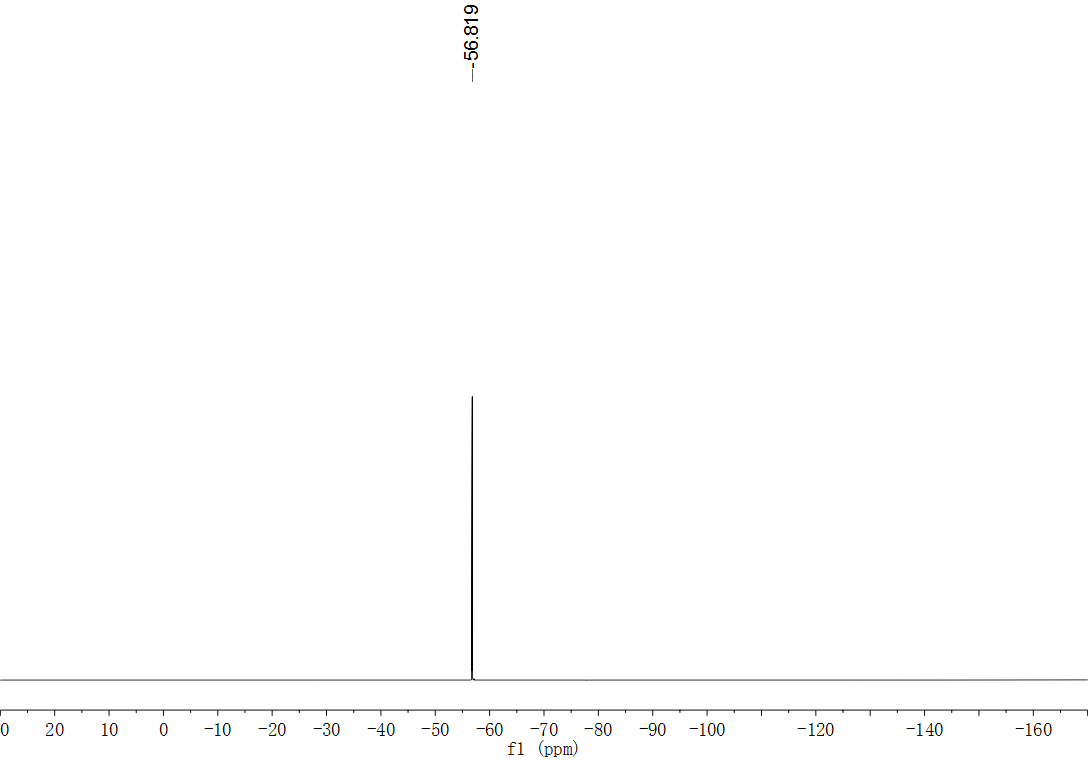


**Fig. S28.** 19F NMR (565 MHz, DMSO) spectrum of compound **12**.


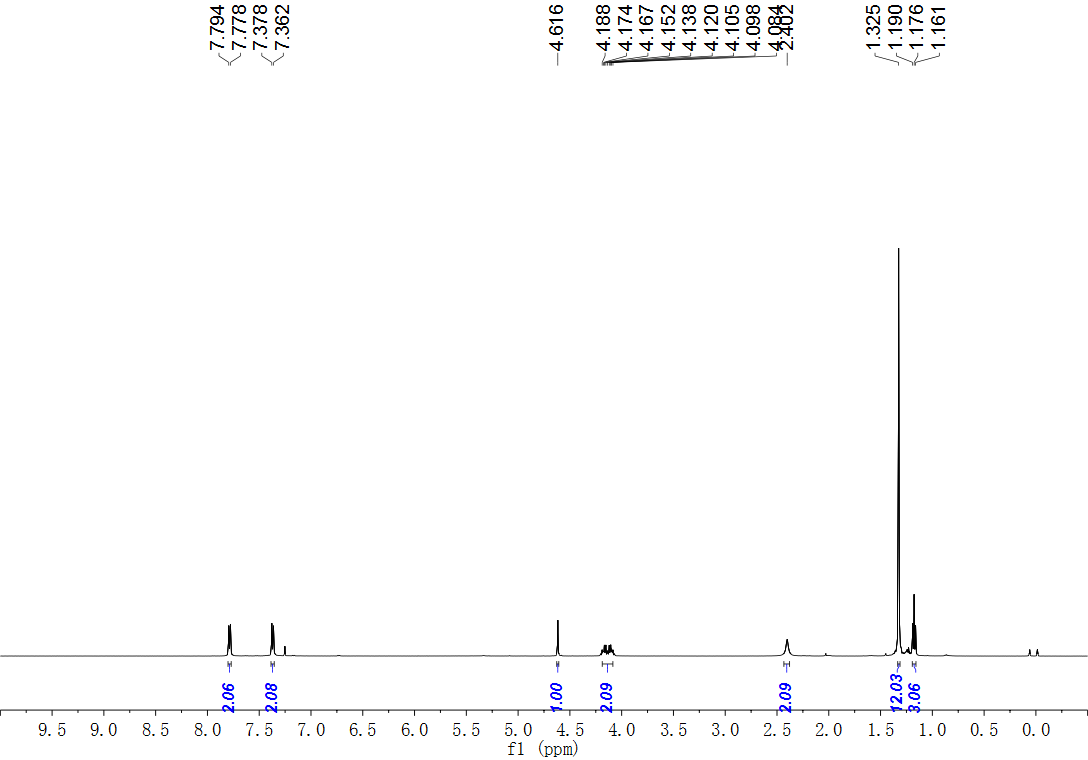


**Fig. S29.** 1H NMR (500 MHz, CDCl3) spectrum of compound **13**.


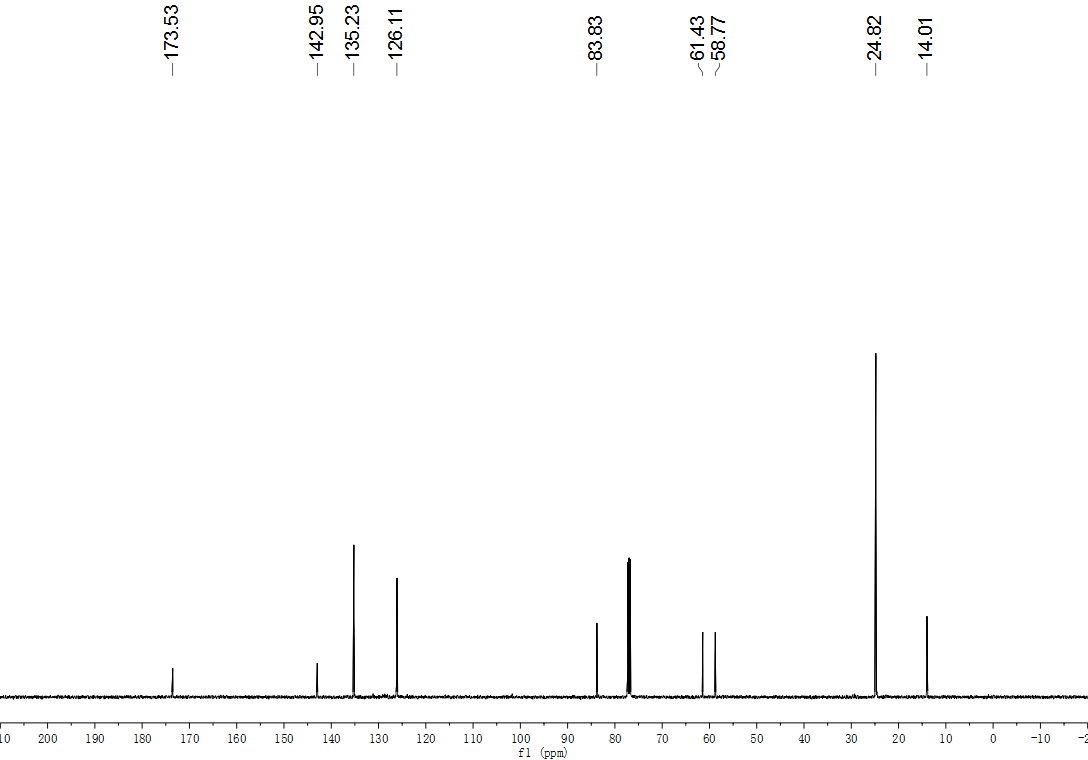


**Fig. S30.** 13C NMR (126 MHz, CDCl3) spectrum of compound **13**.


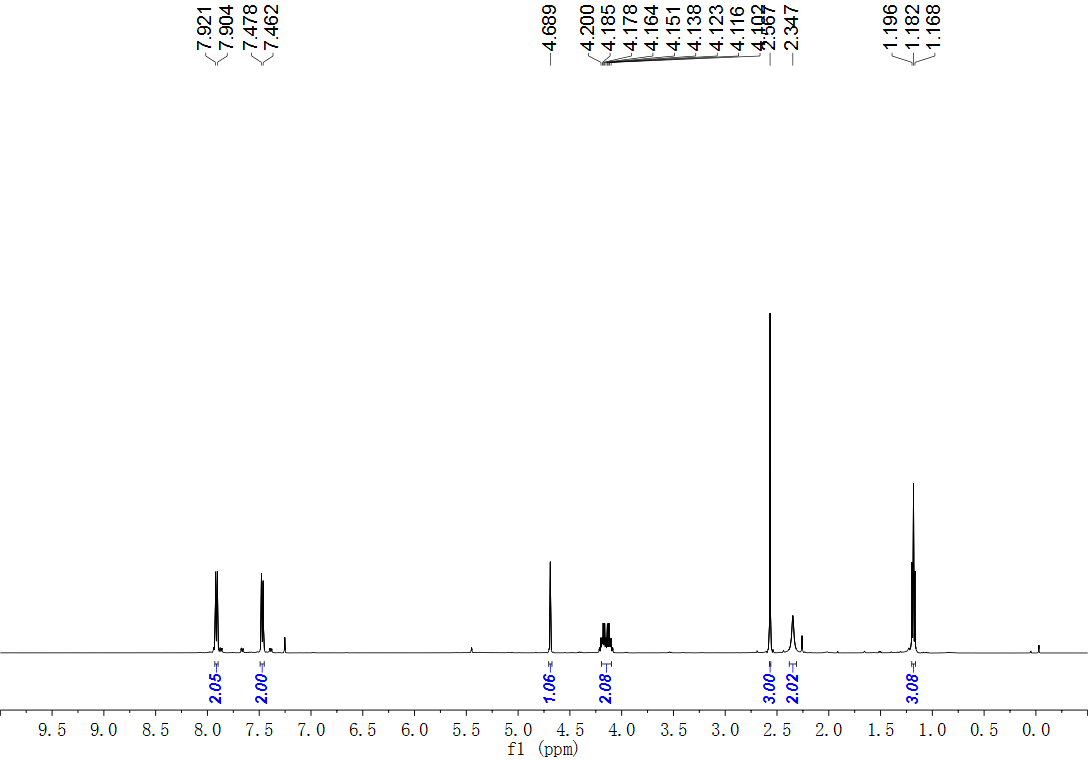


**Fig. S31.** 1H NMR (500 MHz, CDCl3) spectrum of compound **14**.


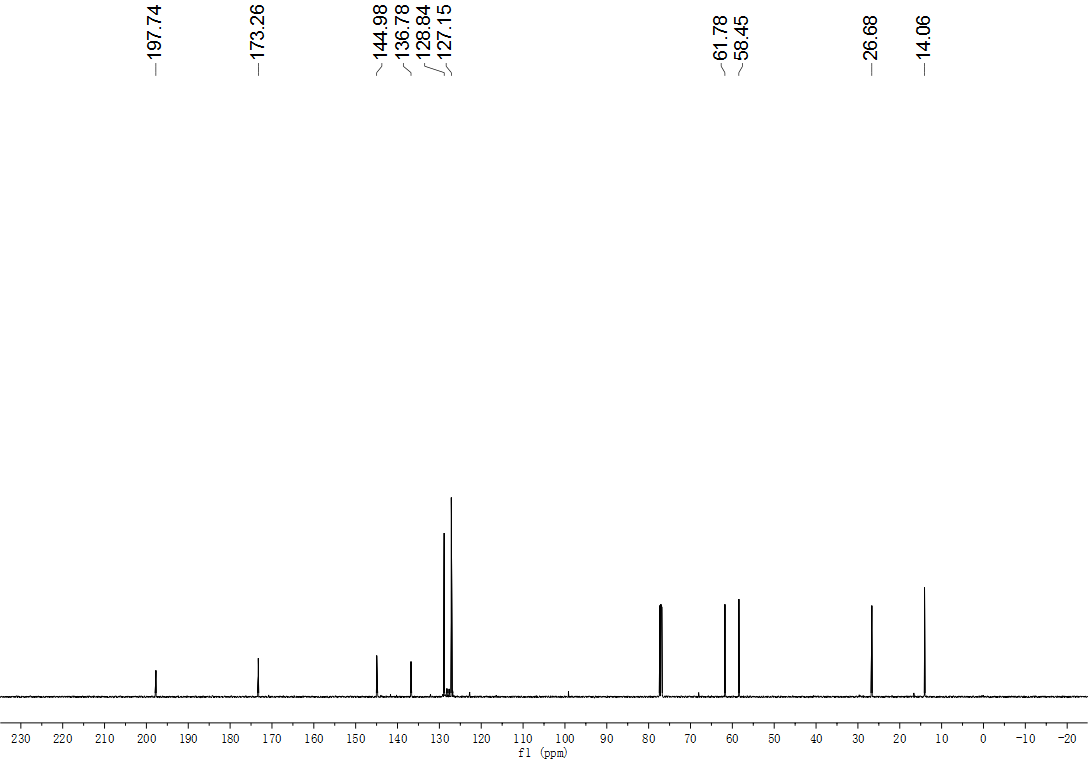


**Fig. S32.** 13C NMR (126 MHz, CDCl3) spectrum of compound **14**.


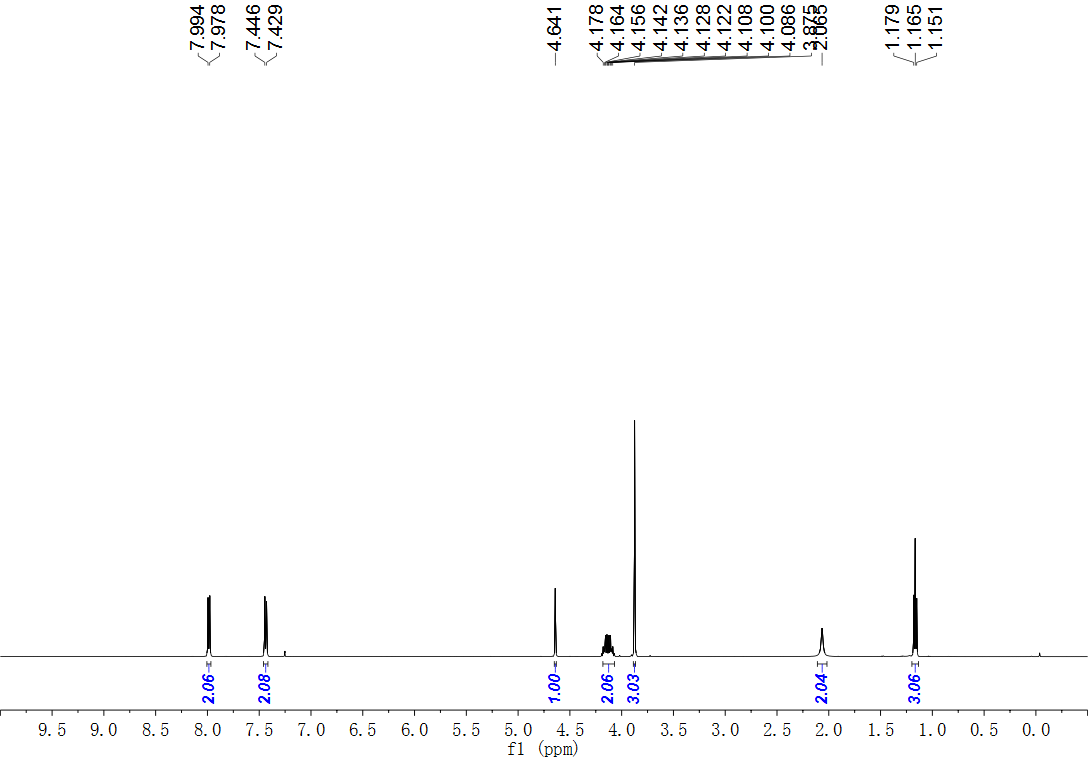


**Fig. S33.** 1H NMR (500 MHz, CDCl3) spectrum of compound **15**.


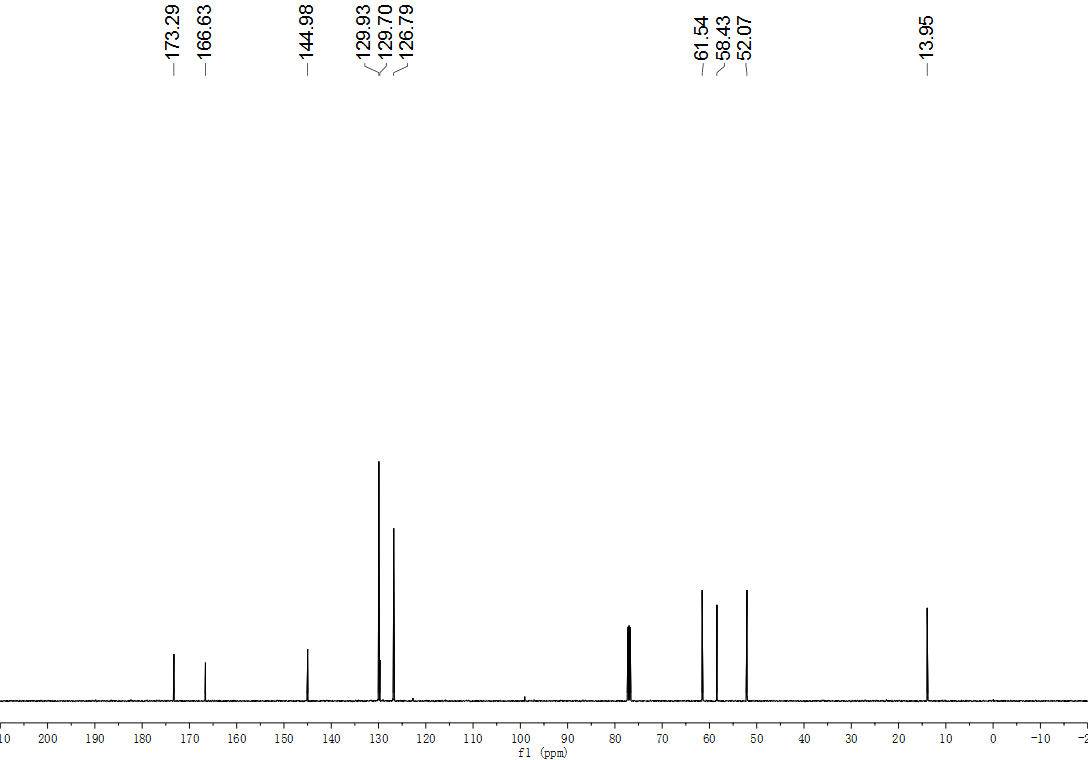


**Fig. S34.** 13C NMR (126 MHz, CDCl3) spectrum of compound **15**.


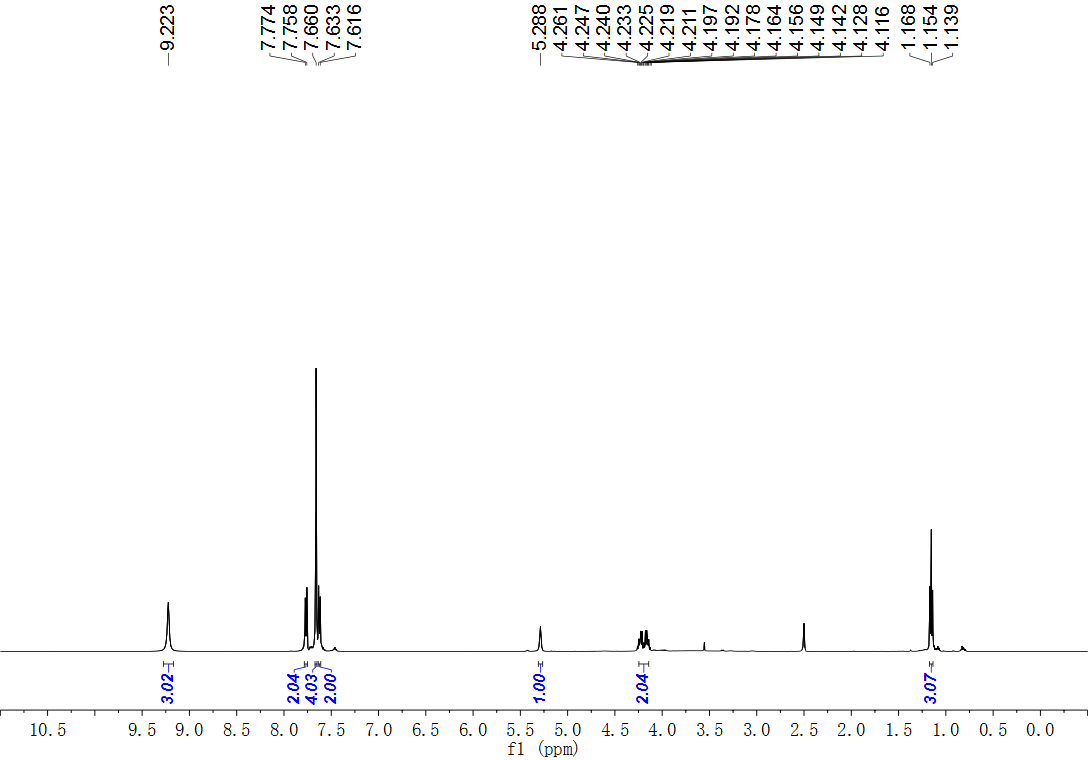


**Fig. S35.** 1H NMR (500 MHz, DMSO) spectrum of compound **16**.


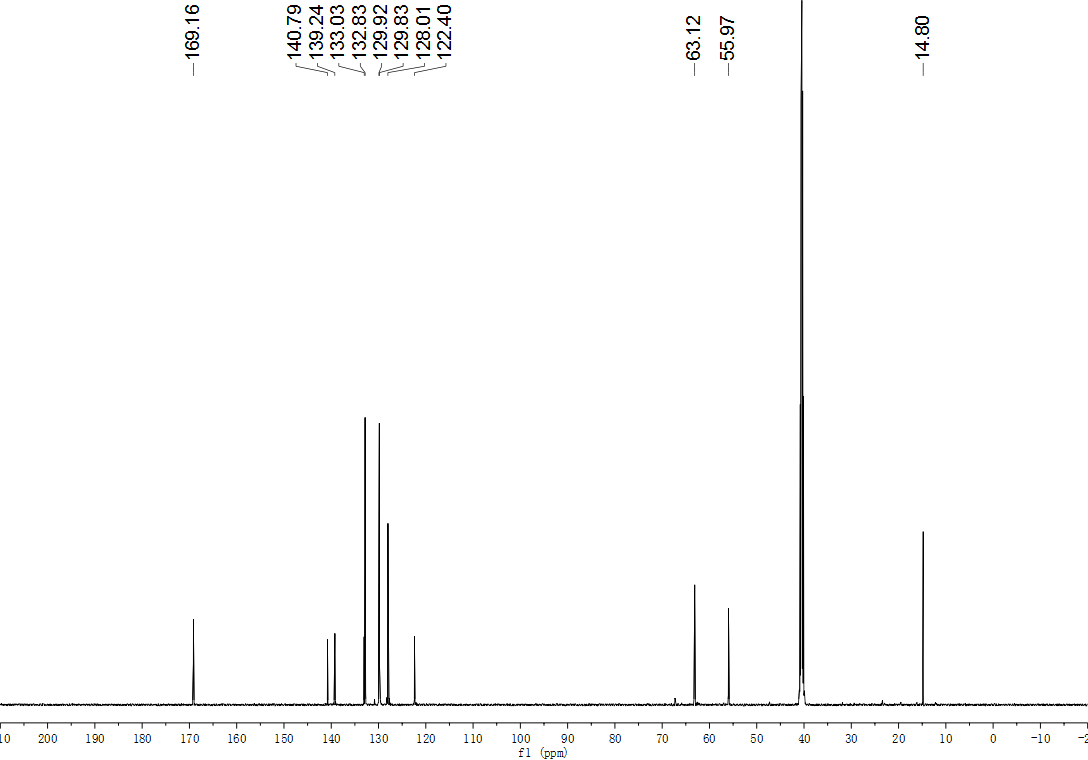


**Fig. S36.** 13C NMR (126 MHz, DMSO) spectrum of compound **16**.


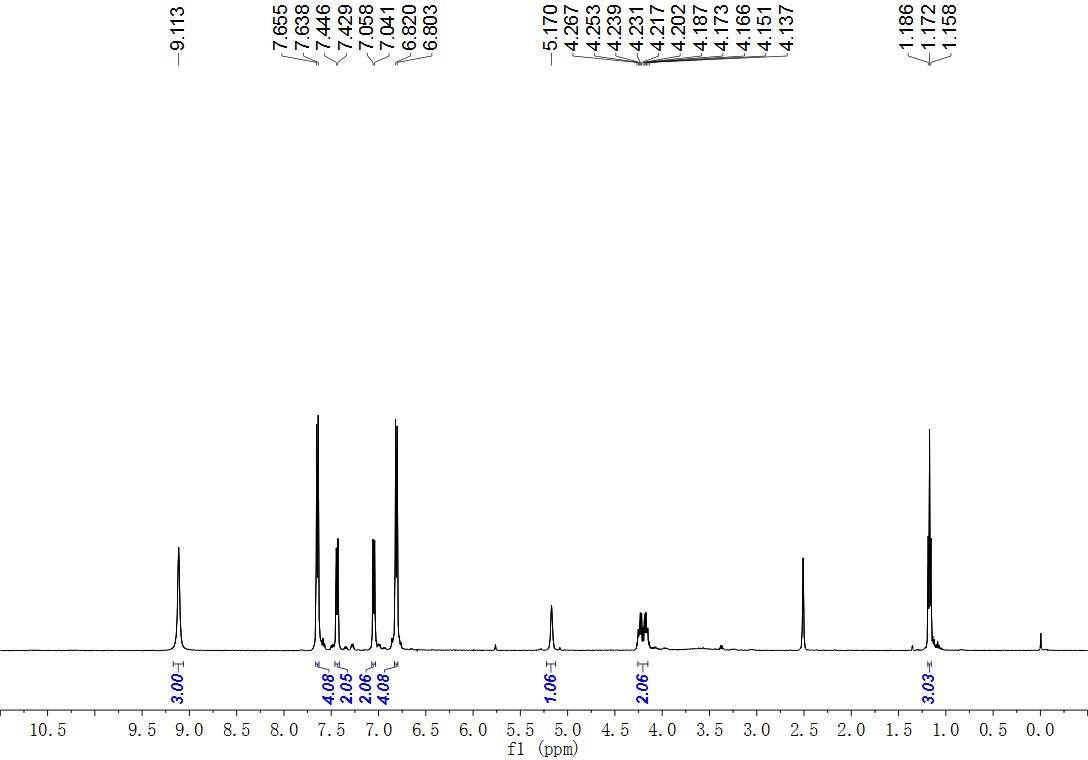


**Fig. S37.** 1H NMR (500 MHz, DMSO) spectrum of compound **17**.


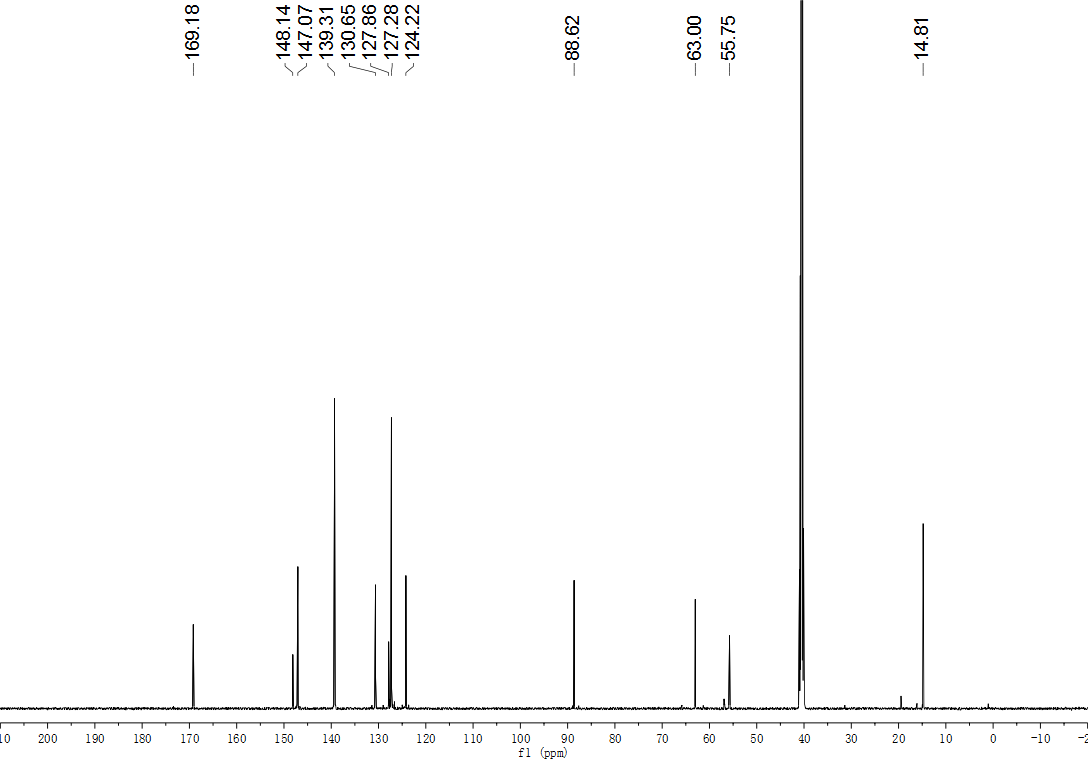


**Fig. S38.** 13C NMR (126 MHz, DMSO) spectrum of compound **17**.


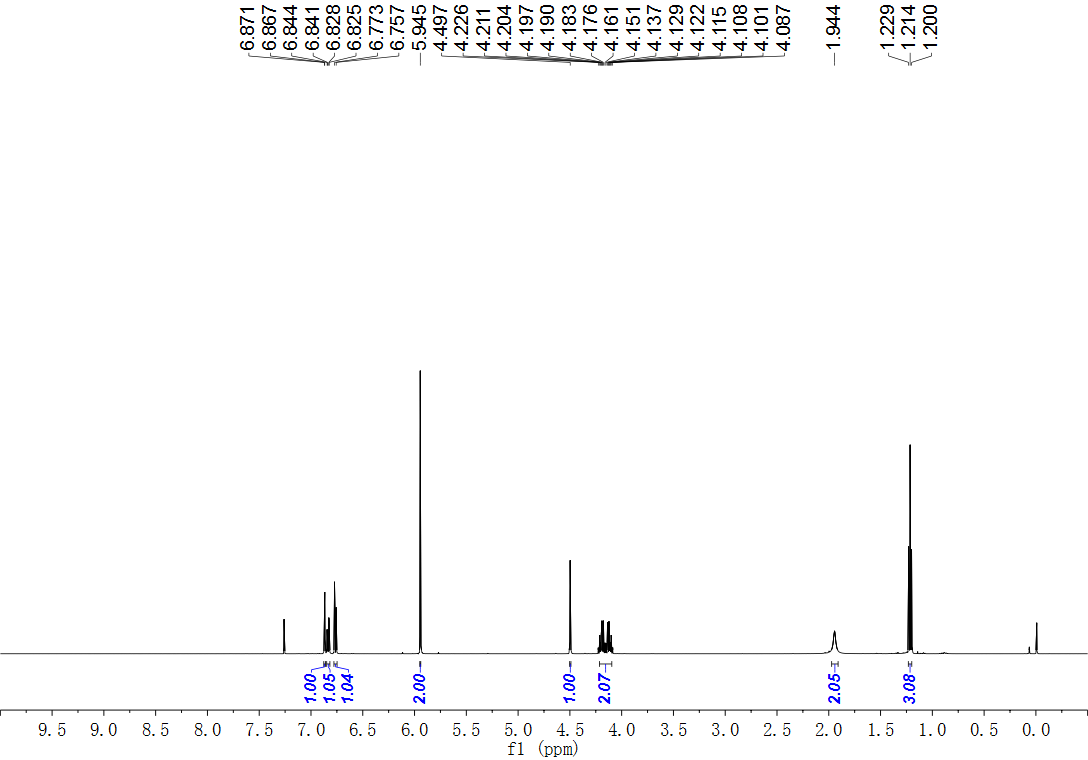


**Fig. S39.** 1H NMR (500 MHz, CDCl3) spectrum of compound **18**.


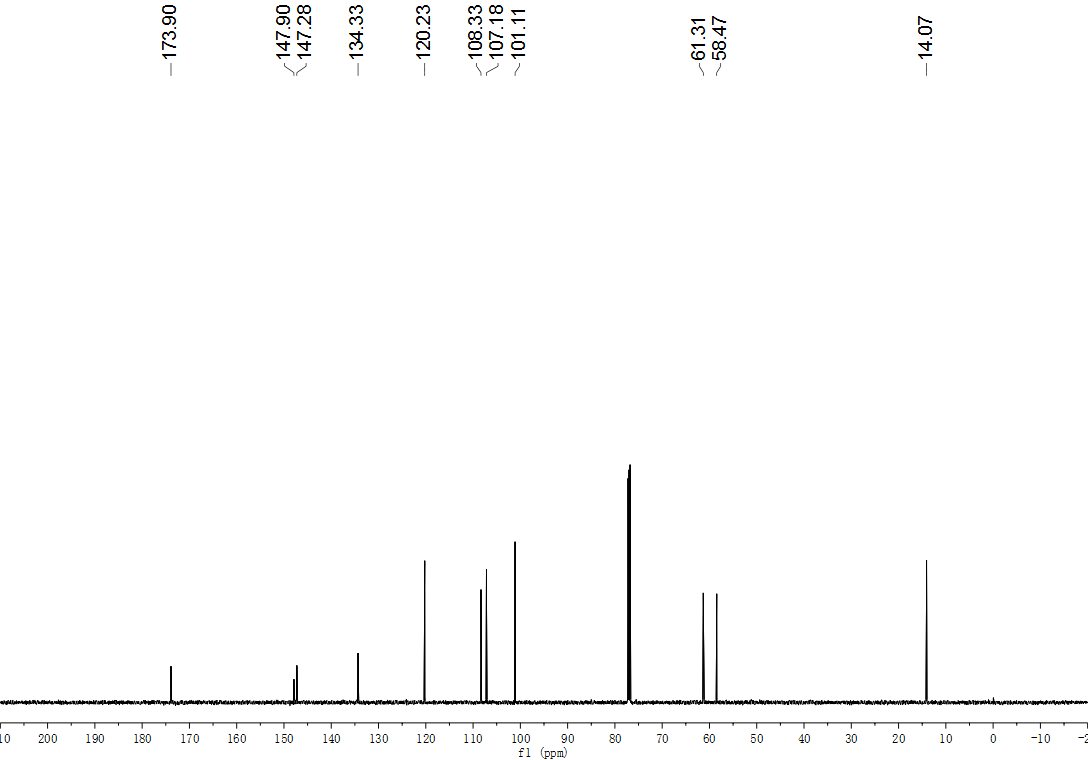


**Fig. S40.** 13C NMR (151 MHz, CDCl3) spectrum of compound **18**.


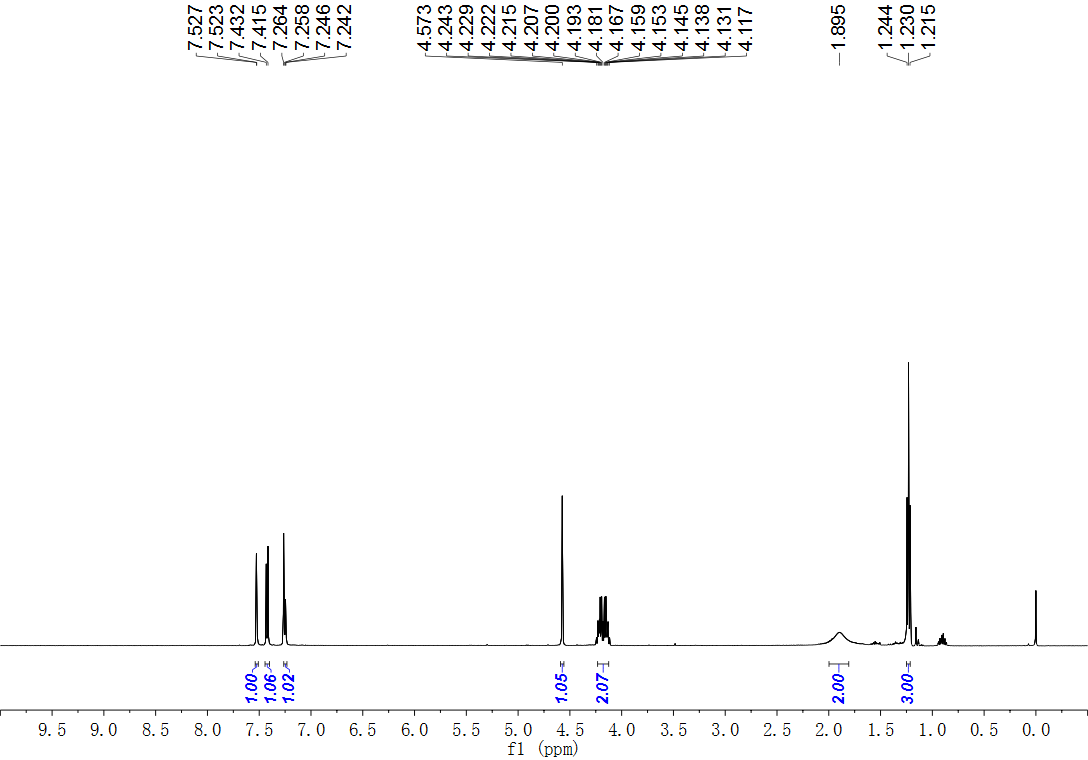


**Fig. S41.** 1H NMR (500 MHz, CDCl3) spectrum of compound **19**.


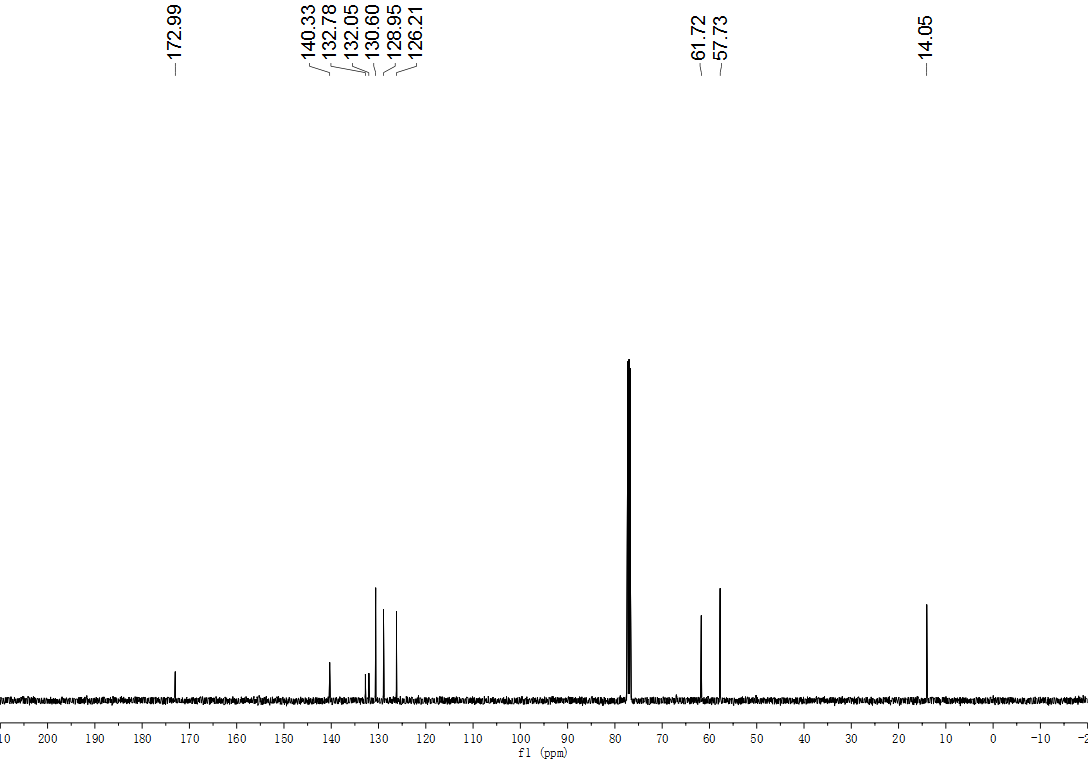


**Fig. S42.** 13C NMR (126 MHz, CDCl3) spectrum of compound **19**.


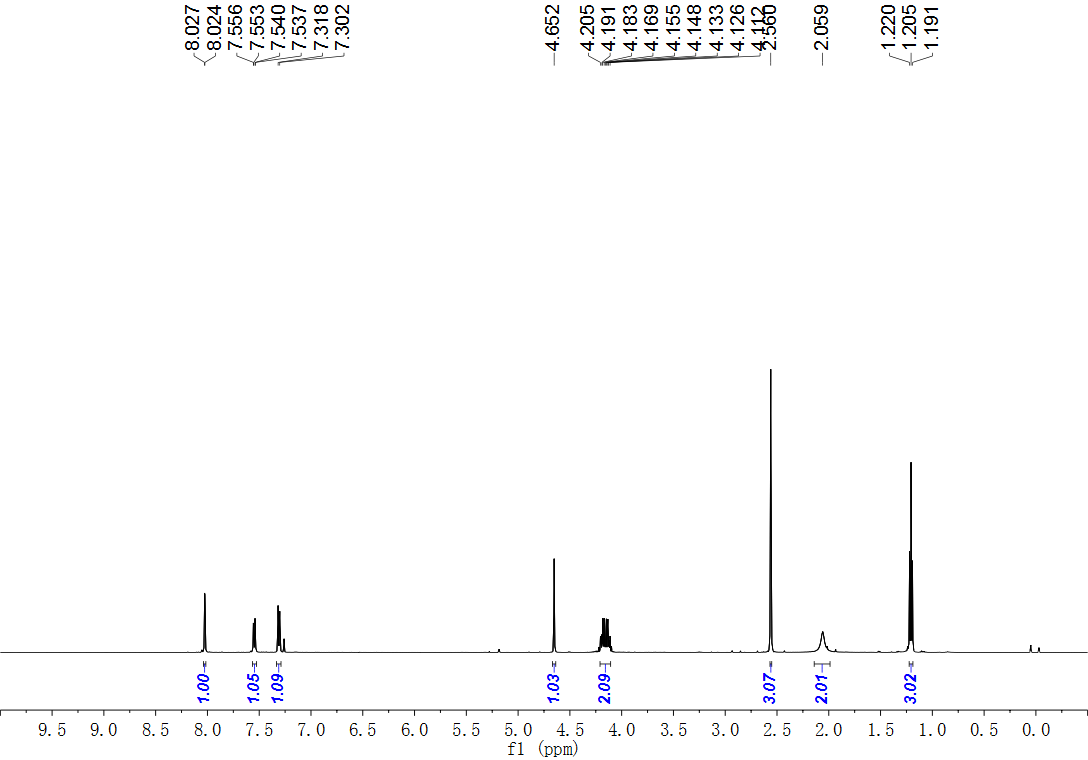


**Fig. S43.** 1H NMR (500 MHz, CDCl3) spectrum of compound **20**.


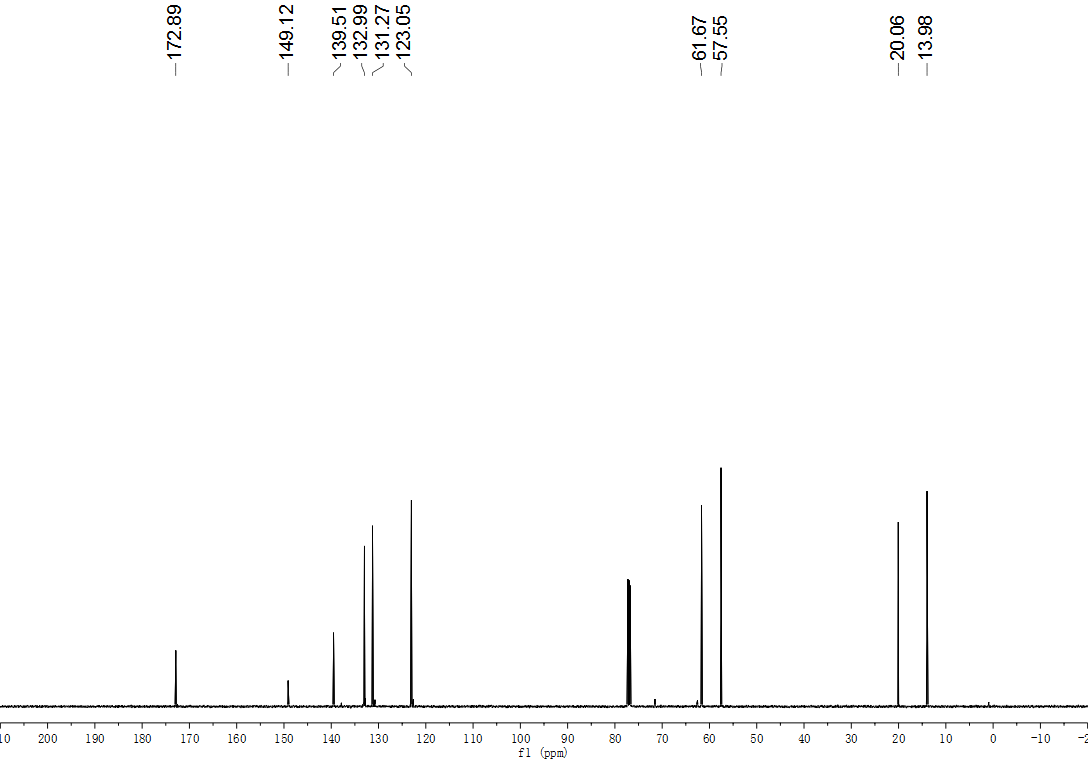


**Fig. S44.** 13C NMR (126 MHz, CDCl3) spectrum of compound **20**.


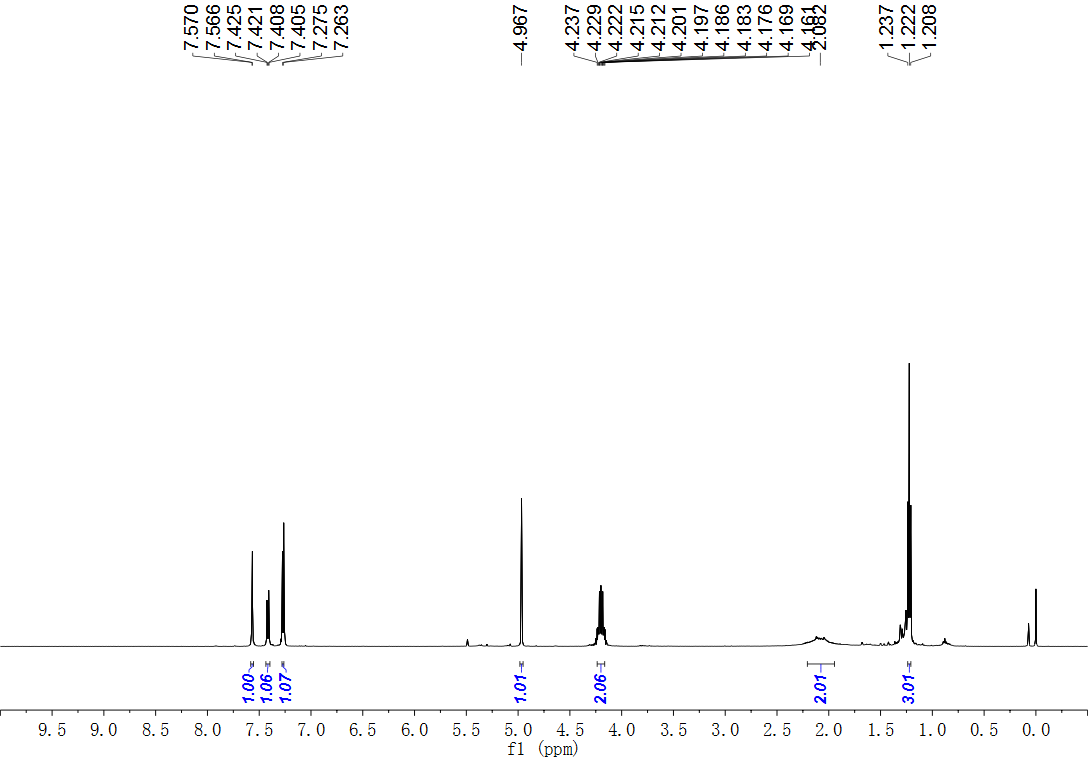


**Fig. S45.** 1H NMR (500 MHz, CDCl3) spectrum of compound **21**.


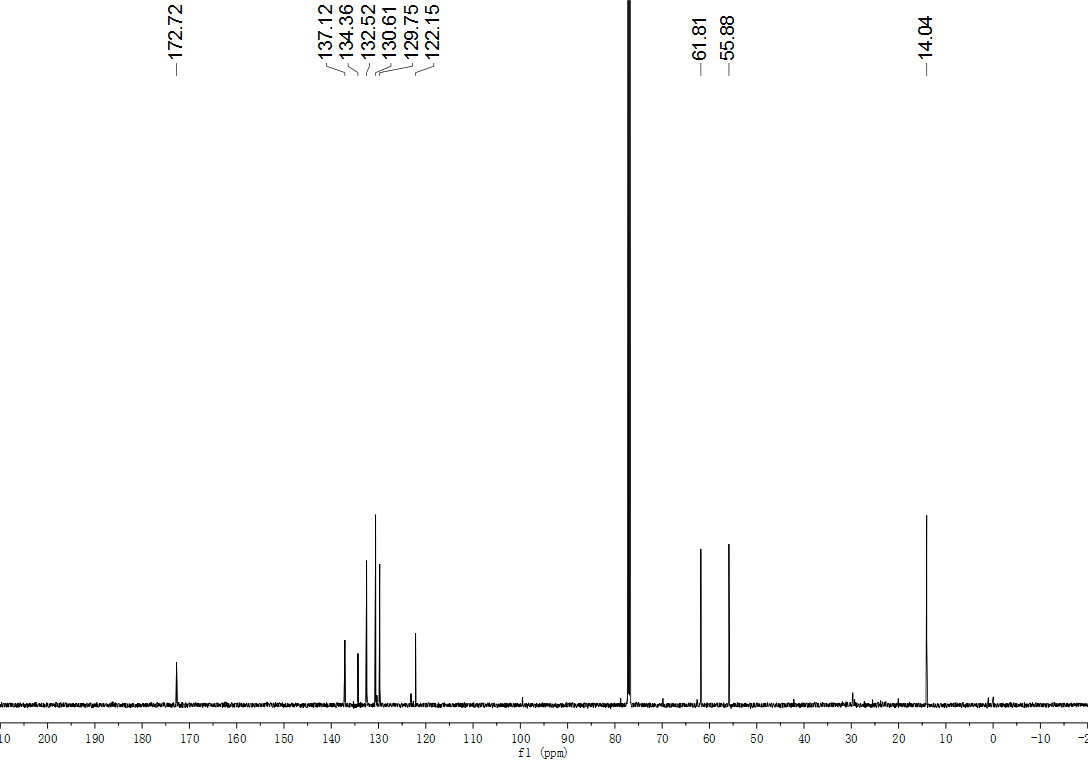


**Fig. S46.** 13C NMR (151 MHz, CDCl3) spectrum of compound **21**.


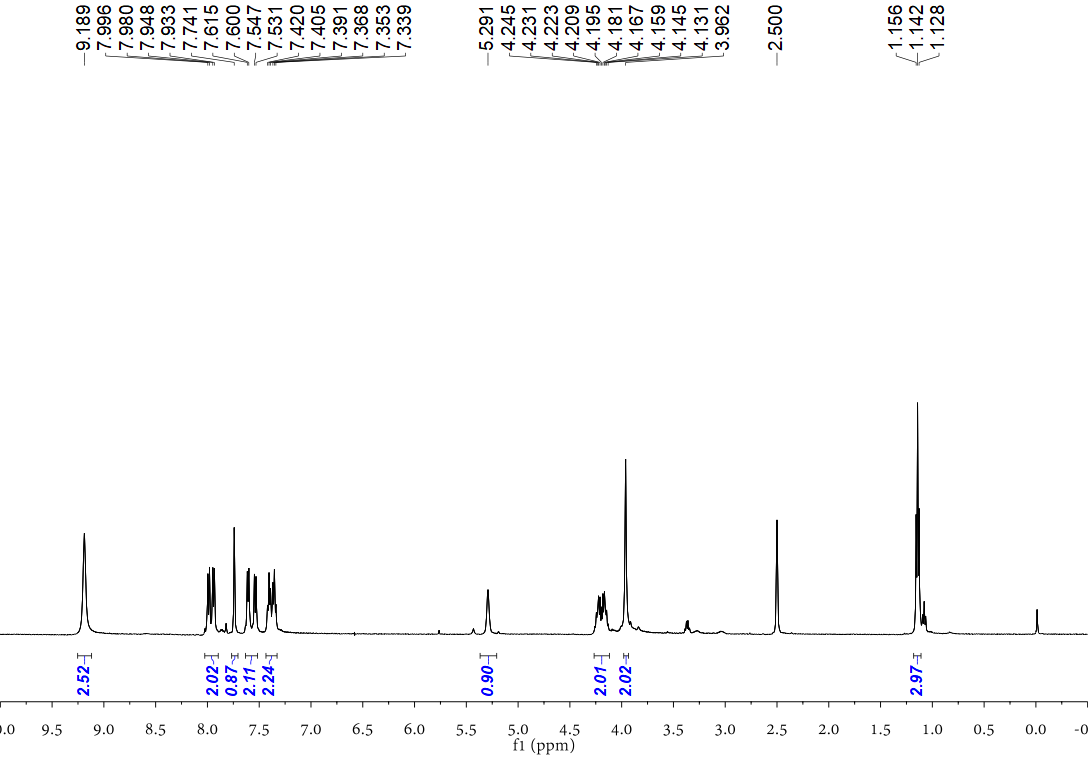


**Fig. S47.** 1H NMR (500 MHz, DMSO) spectrum of compound **22**.


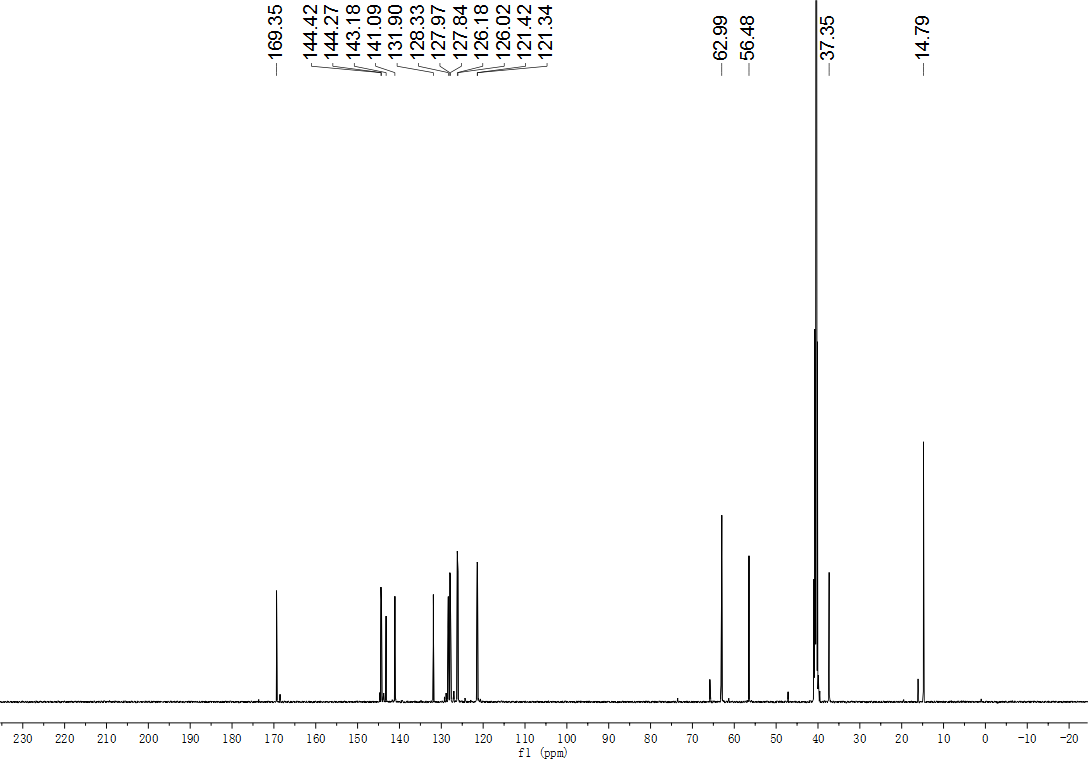


**Fig. S48.** 13C NMR (126 MHz, DMSO) spectrum of compound **22**.


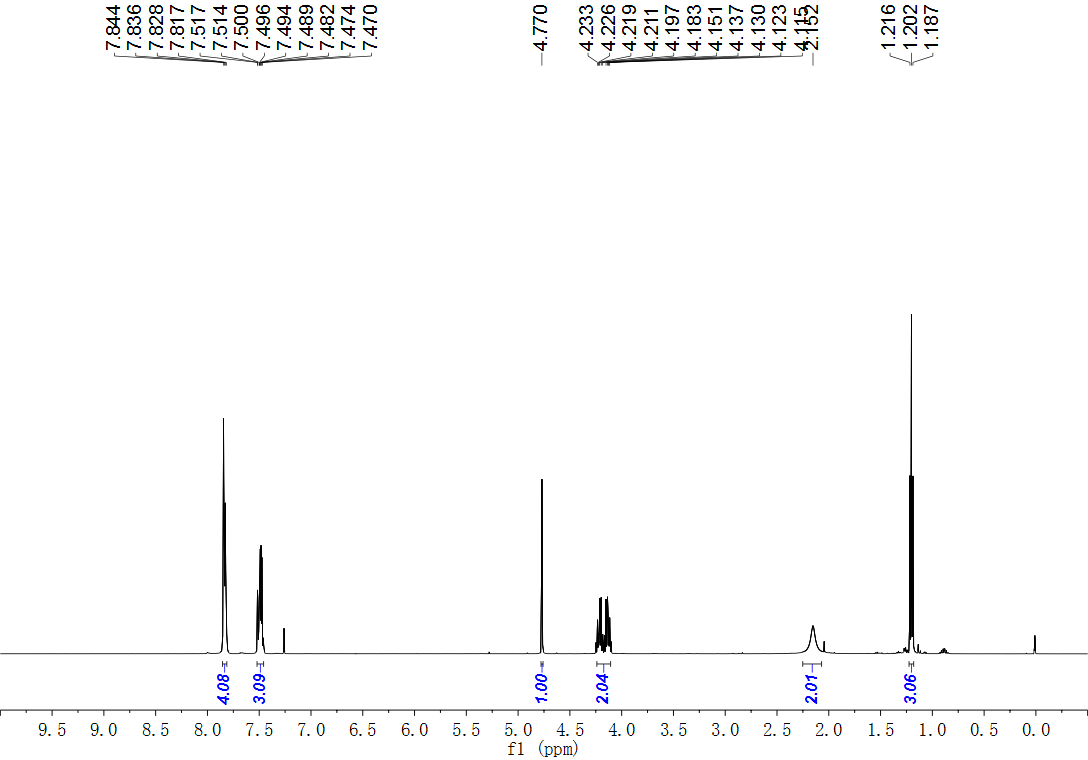


**Fig. S49.** 1H NMR (500 MHz, CDCl3) spectrum of compound **23**.


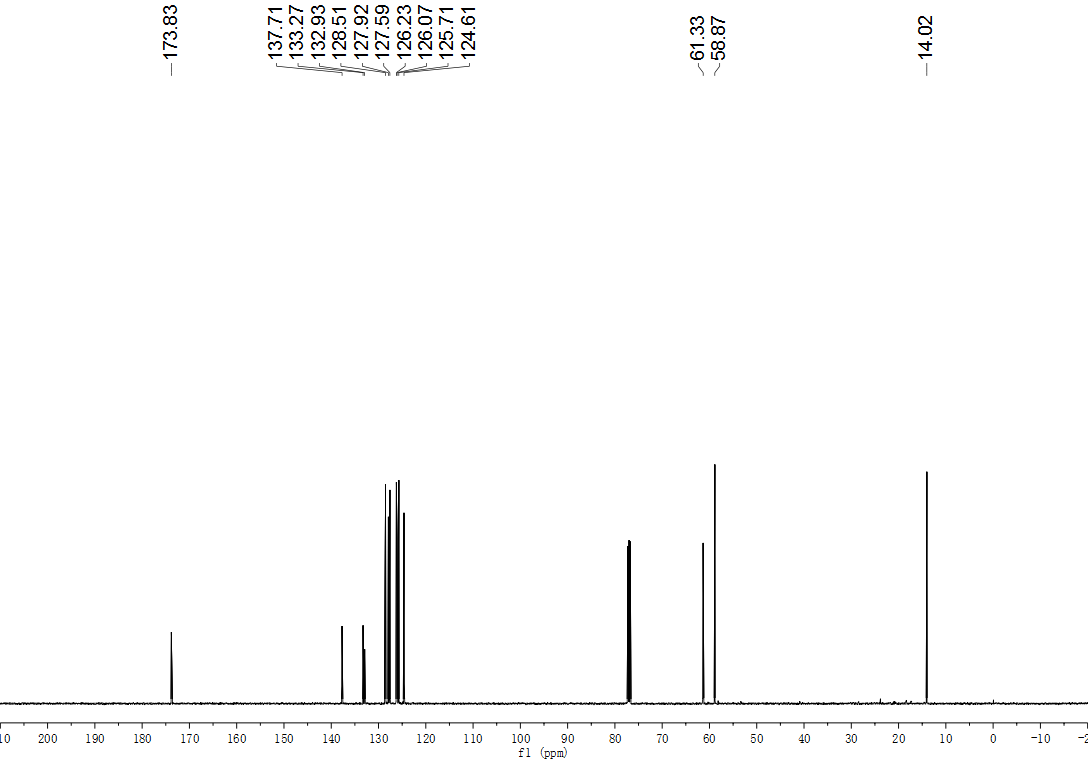


**Fig. S50.** 13C NMR (126 MHz, CDCl3) spectrum of compound **23**.


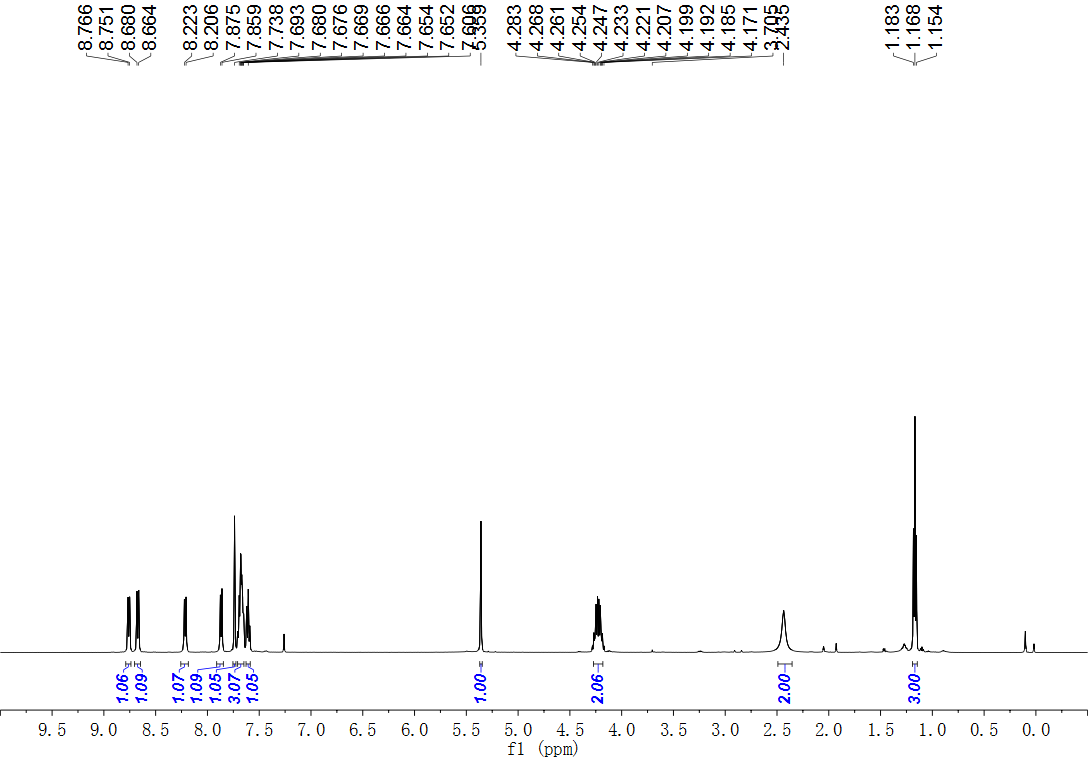


**Fig. S51.** 1H NMR (500 MHz, CDCl3) spectrum of compound **24**.


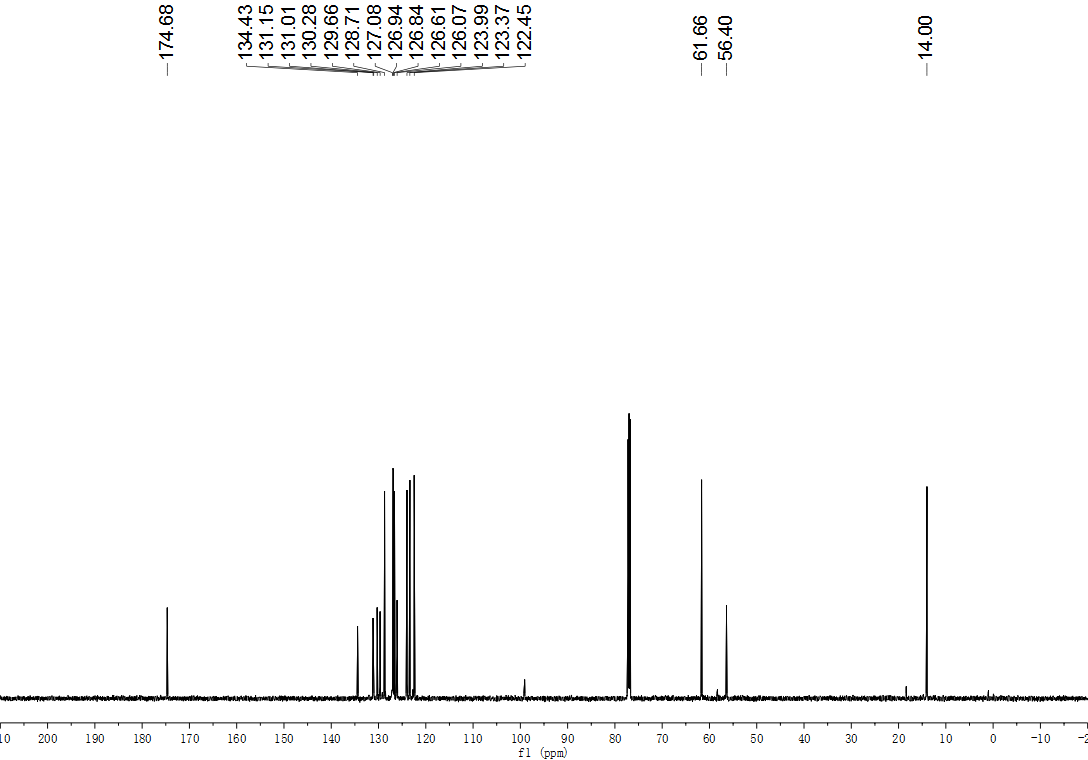


**Fig. S52.** 13C NMR (151 MHz, CDCl3) spectrum of compound **24**.


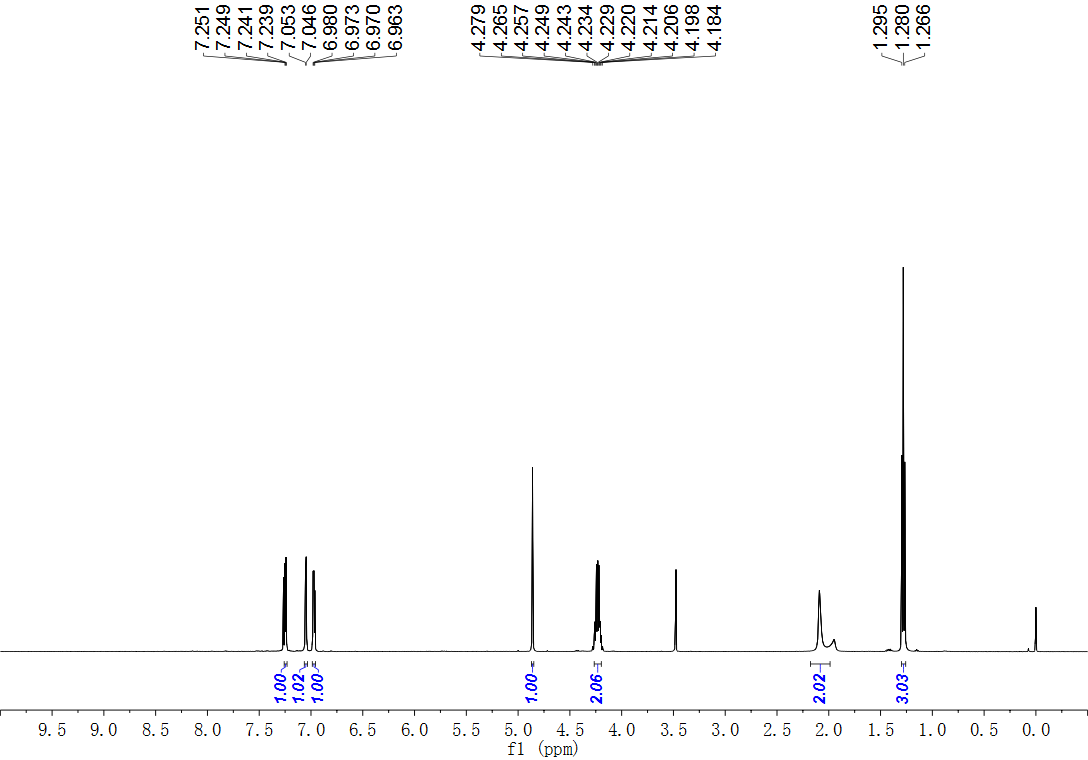


**Fig. S53.** 1H NMR (500 MHz, CDCl3) spectrum of compound **25**.


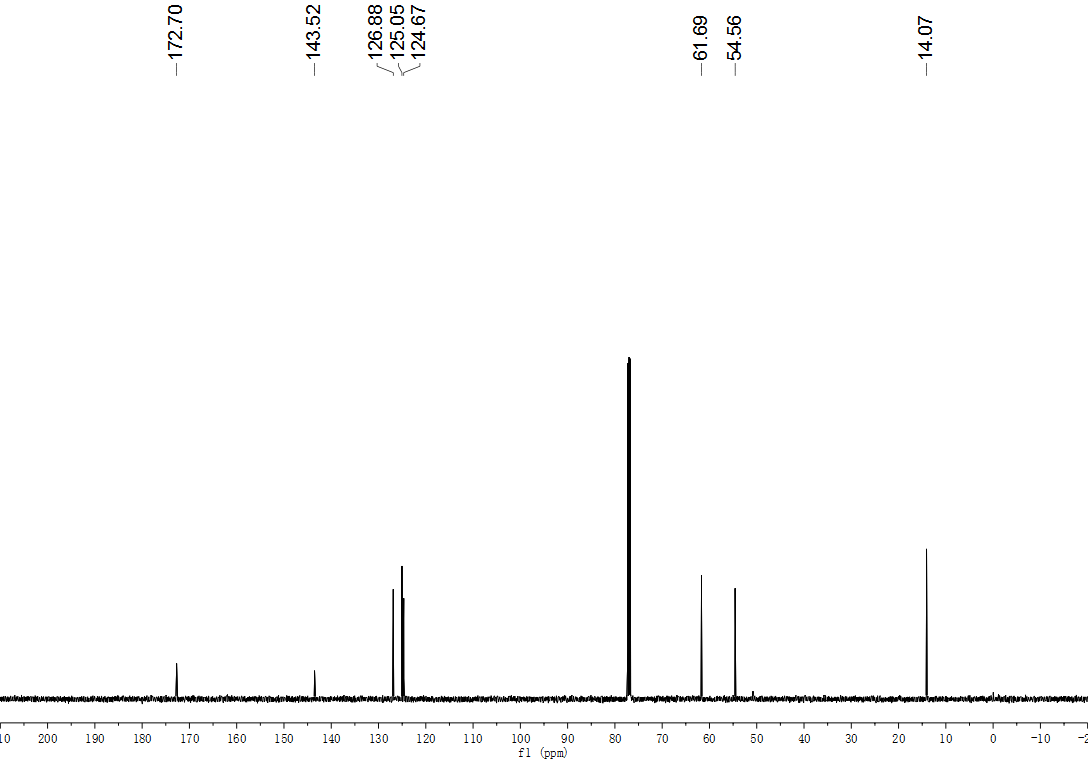


**Fig. S54.** 13C NMR (126 MHz, CDCl3) spectrum of compound **25**.


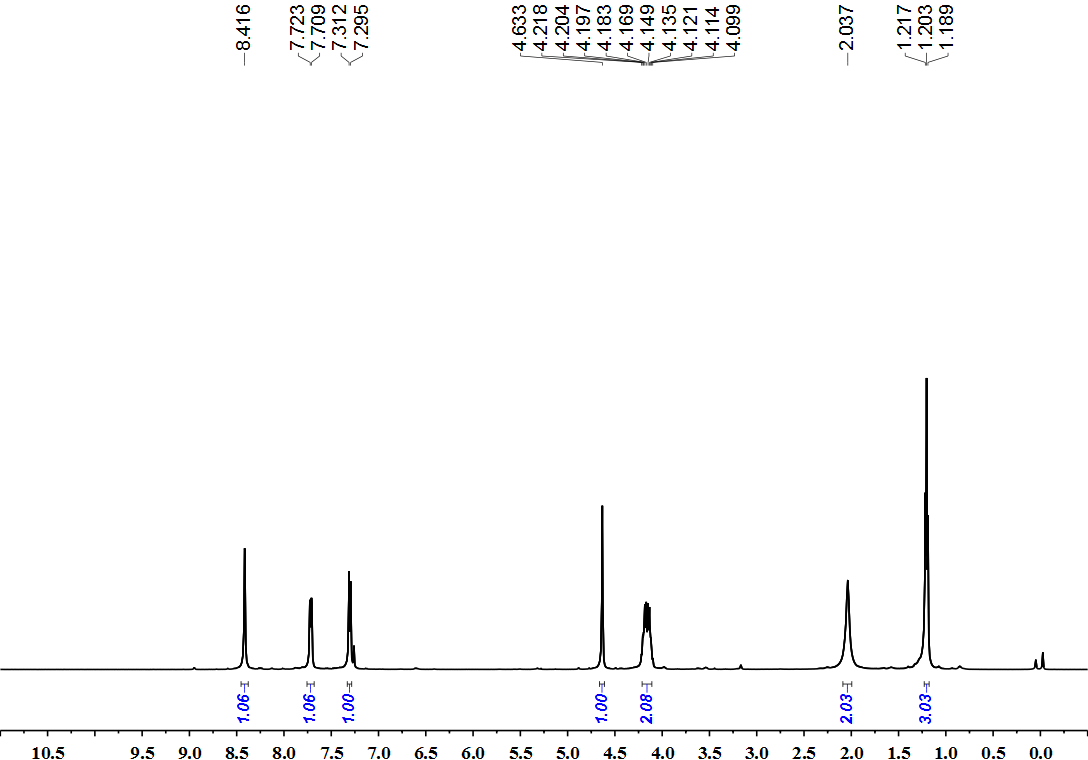


**Fig. S55.** 1H NMR (500 MHz, CDCl3) spectrum of compound **26**.


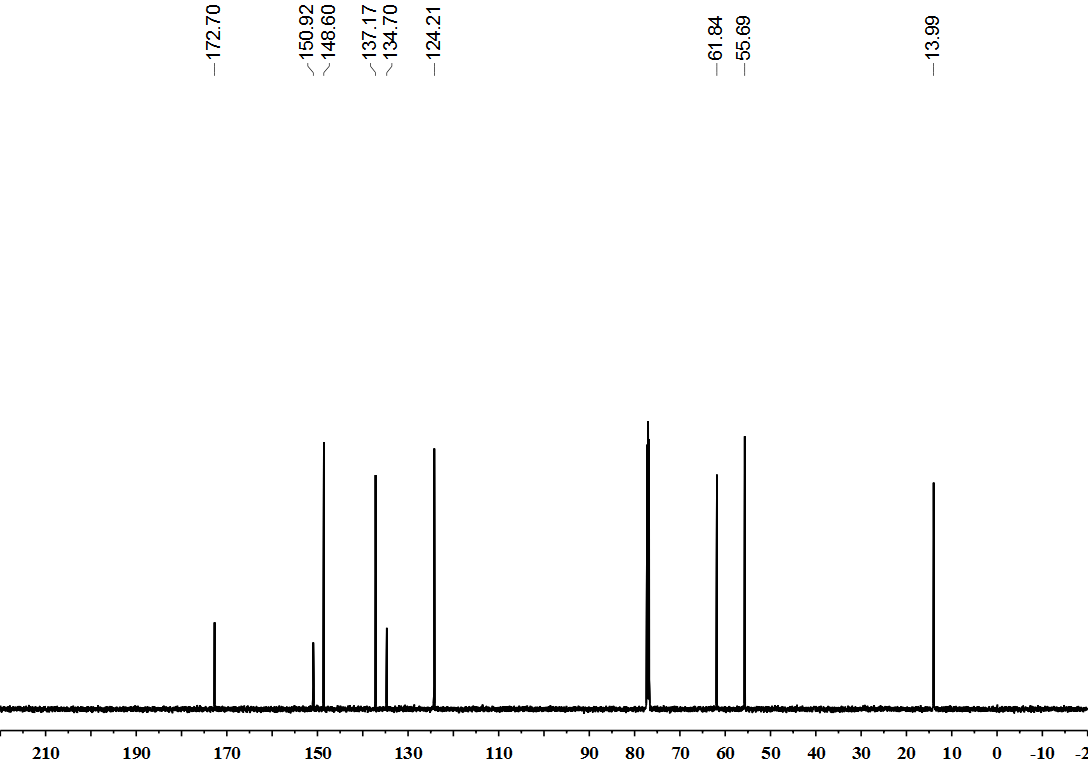


**Fig. S56.** 13C NMR (151 MHz, CDCl3) spectrum of compound **26**.


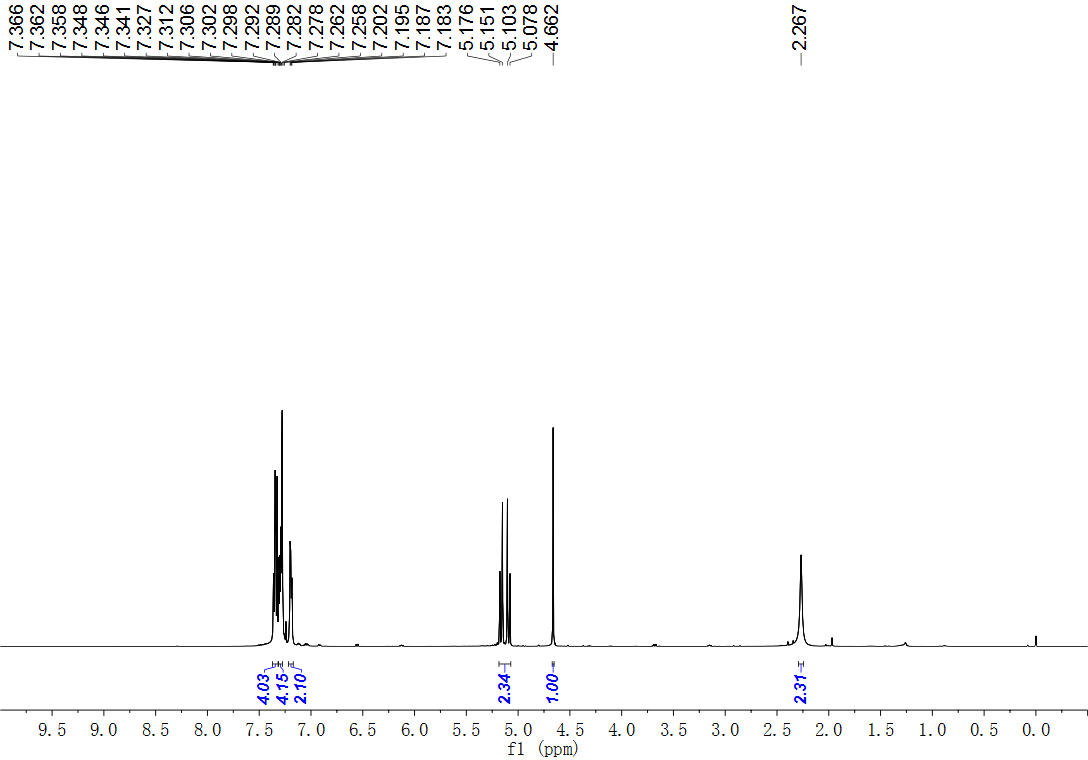


**Fig. S57.** 1H NMR (500 MHz, CDCl3) spectrum of compound **27**.


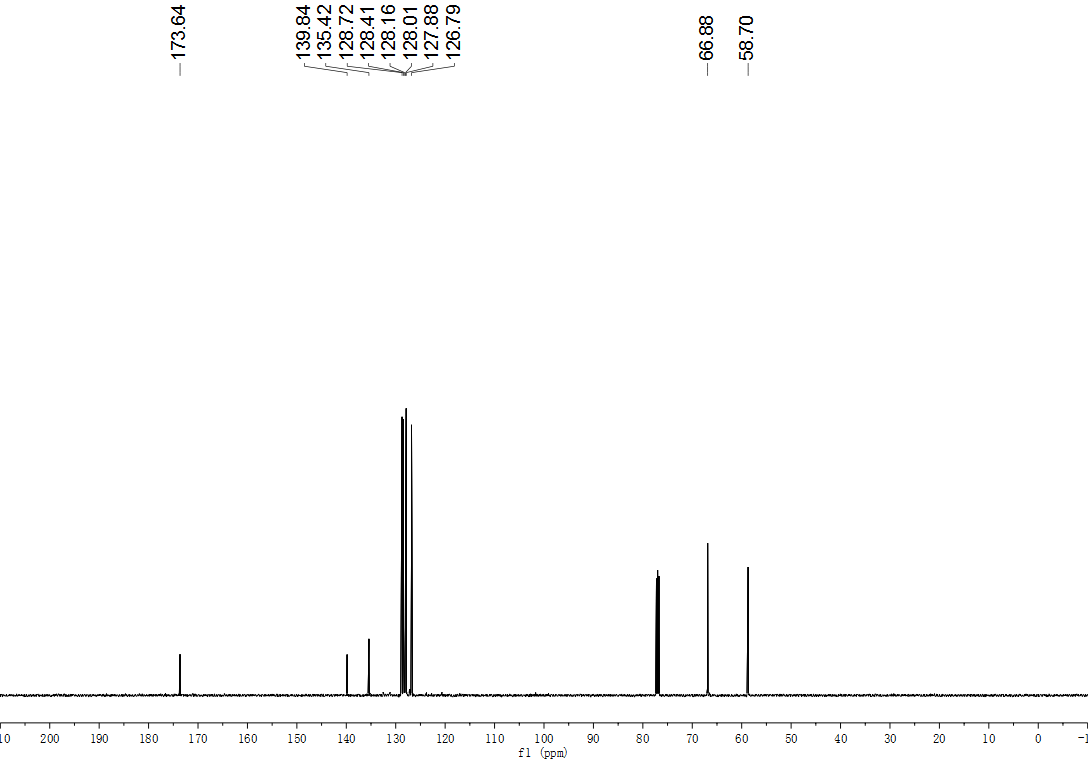


**Fig. S58.** 13C NMR (126 MHz, CDCl3) spectrum of compound **27**.


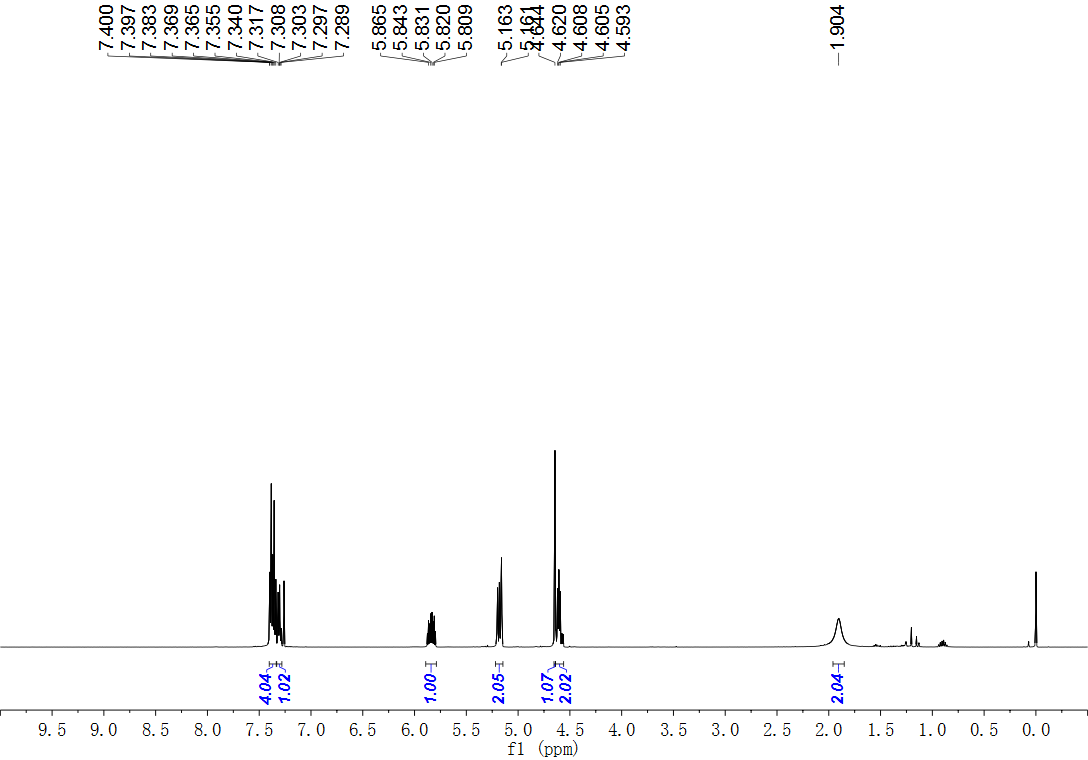


**Fig. S59.** 1H NMR (500 MHz, CDCl3) spectrum of compound **28**.


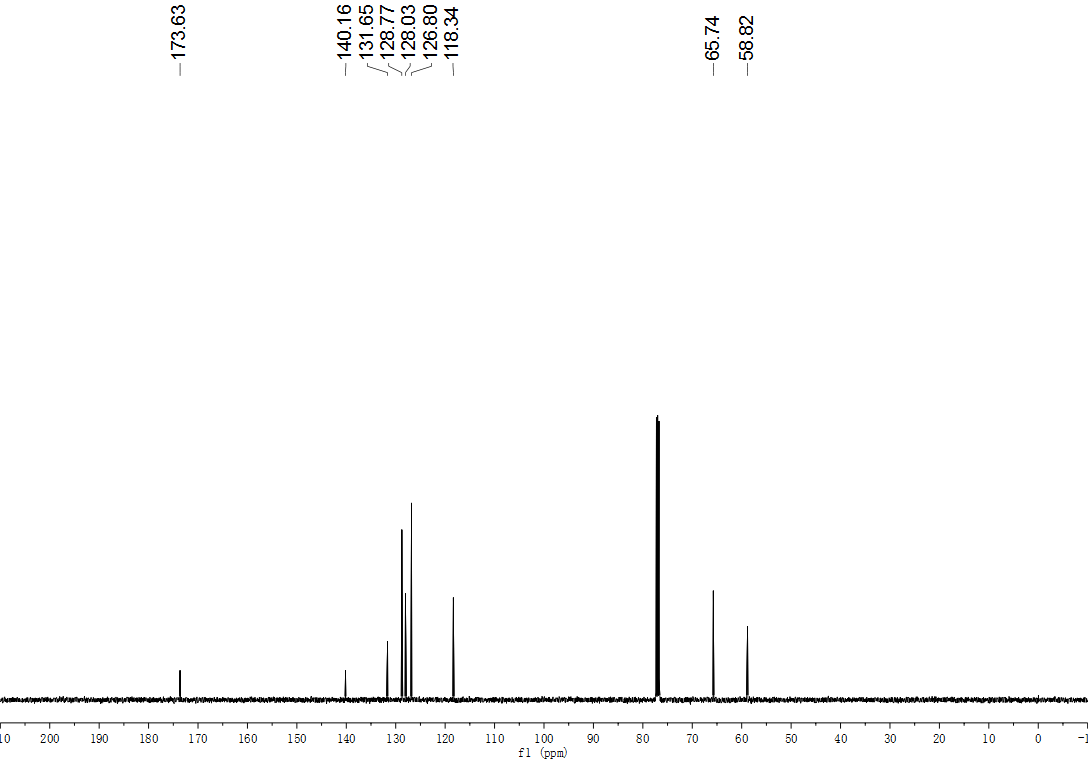


**Fig. S60.** 13C NMR (126 MHz, CDCl3) spectrum of compound **28**.


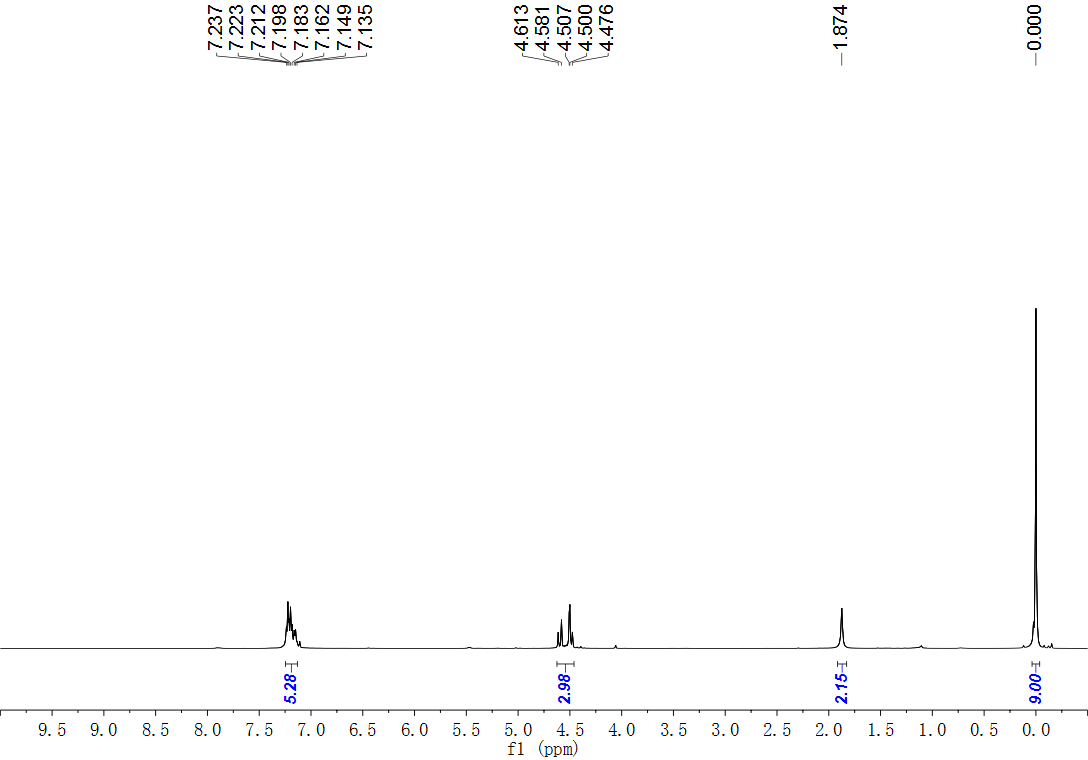


**Fig. S61.** 1H NMR (500 MHz, CDCl3) spectrum of compound **29**.


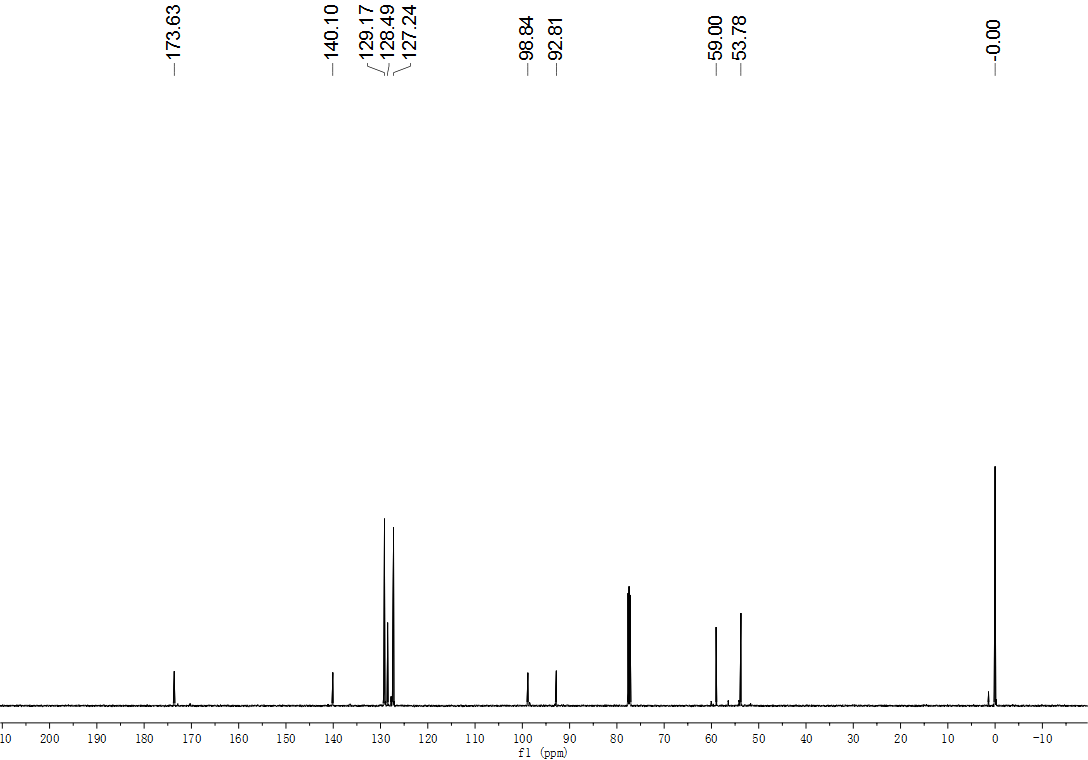


**Fig. S62.** 13C NMR (151 MHz, CDCl3) spectrum of compound **29**.


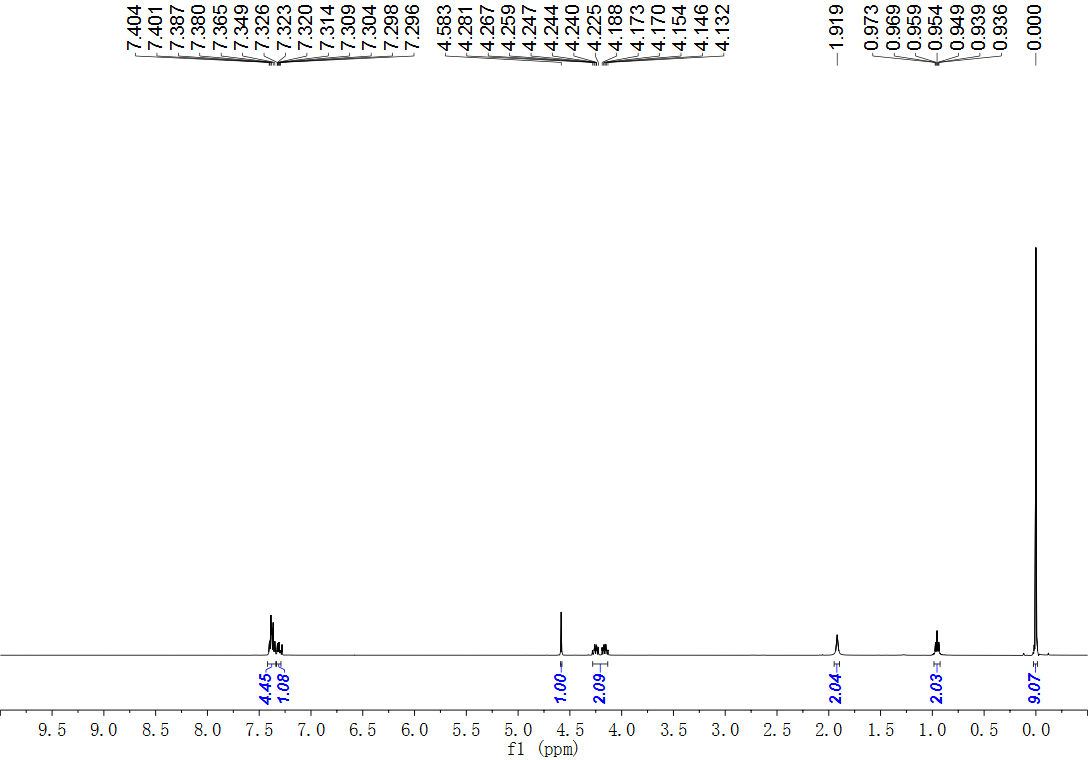


**Fig. S63.** 1H NMR (500 MHz, CDCl3) spectrum of compound **30**.


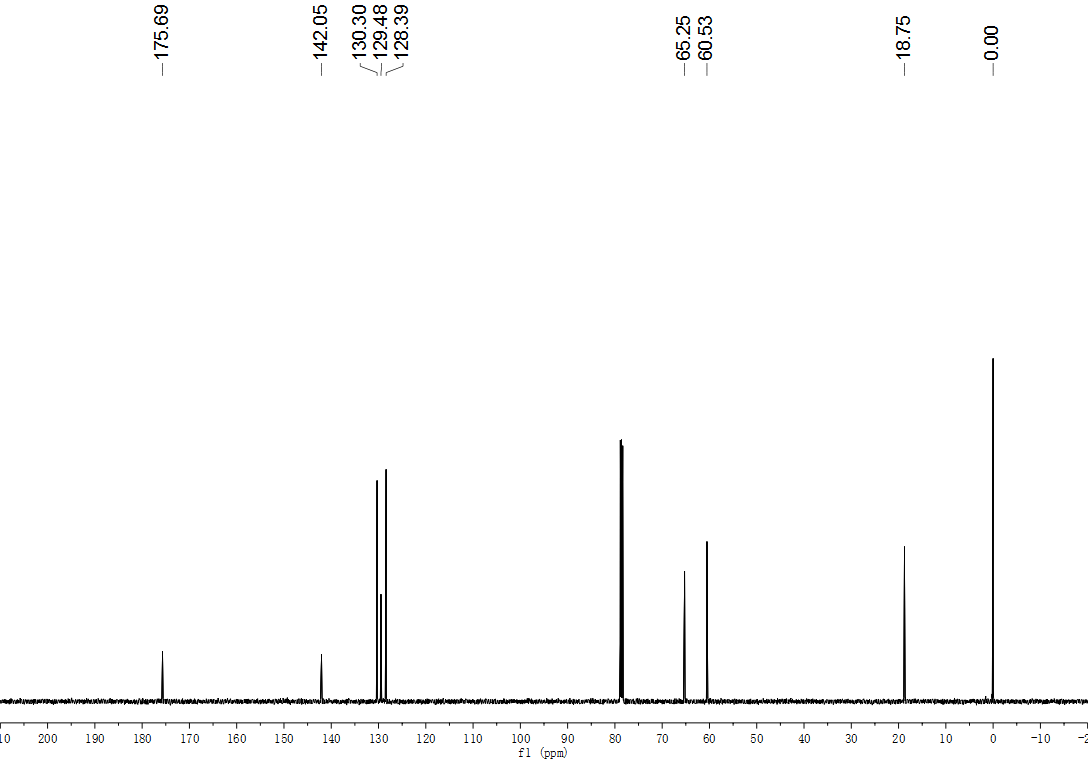


**Fig. S64.** 13C NMR (126 MHz, CDCl3) spectrum of compound **30**.


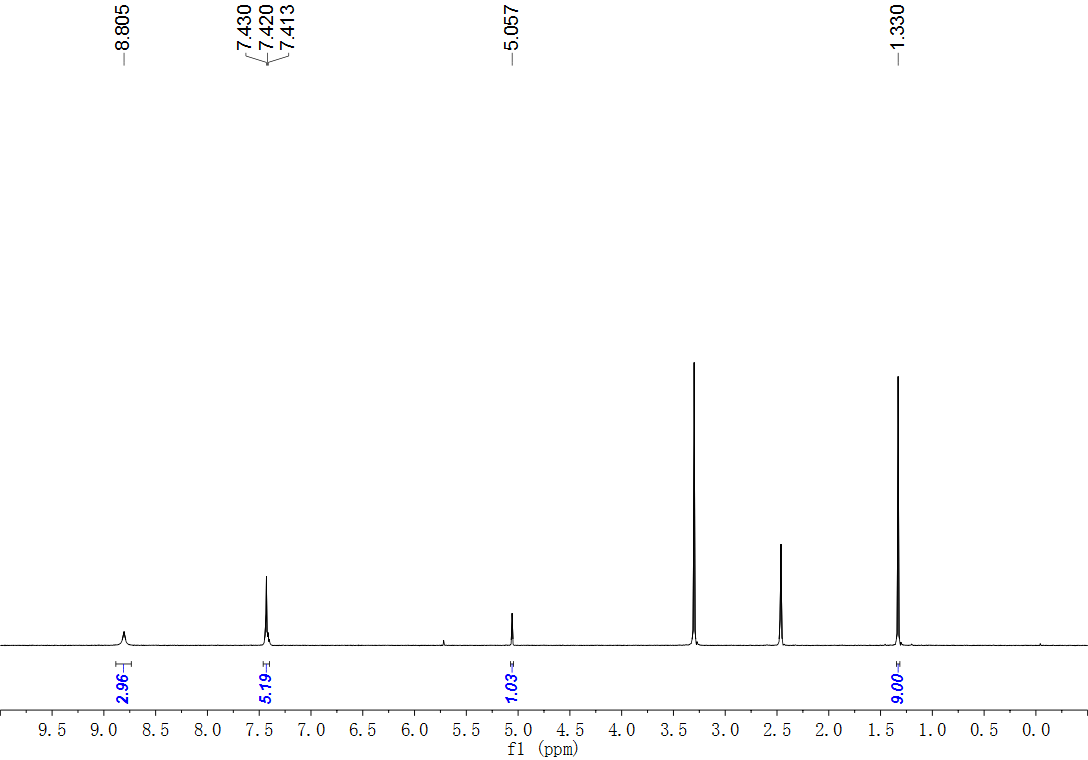


**Fig. S65.** 1H NMR (500 MHz, DMSO) spectrum of compound **31**.


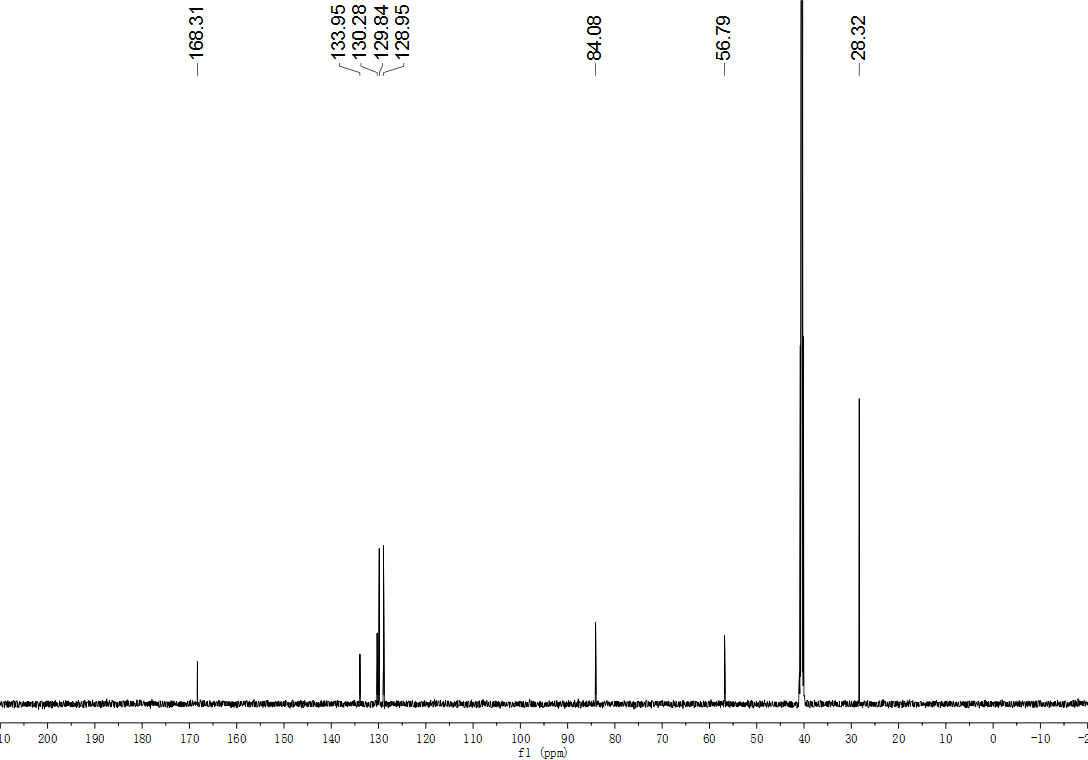


**Fig. S66.** 13C NMR (126 MHz, DMSO) spectrum of compound **31**.


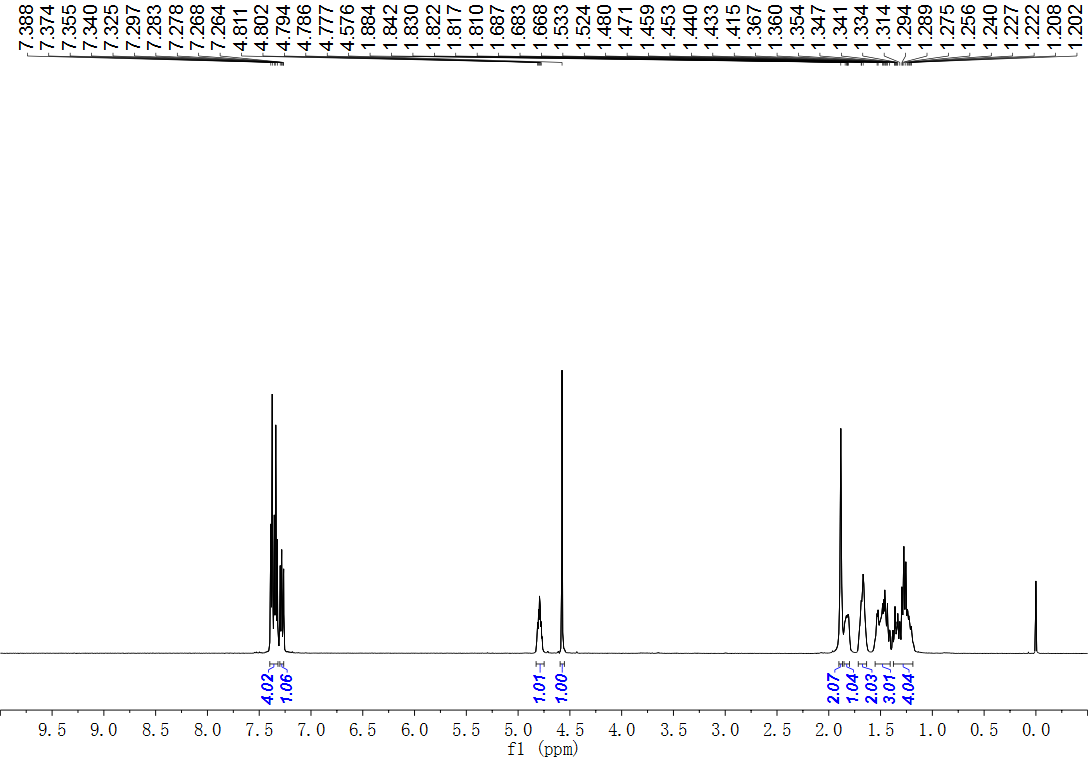


**Fig. S67.** 1H NMR (600 MHz, CDCl3) spectrum of compound **32**.


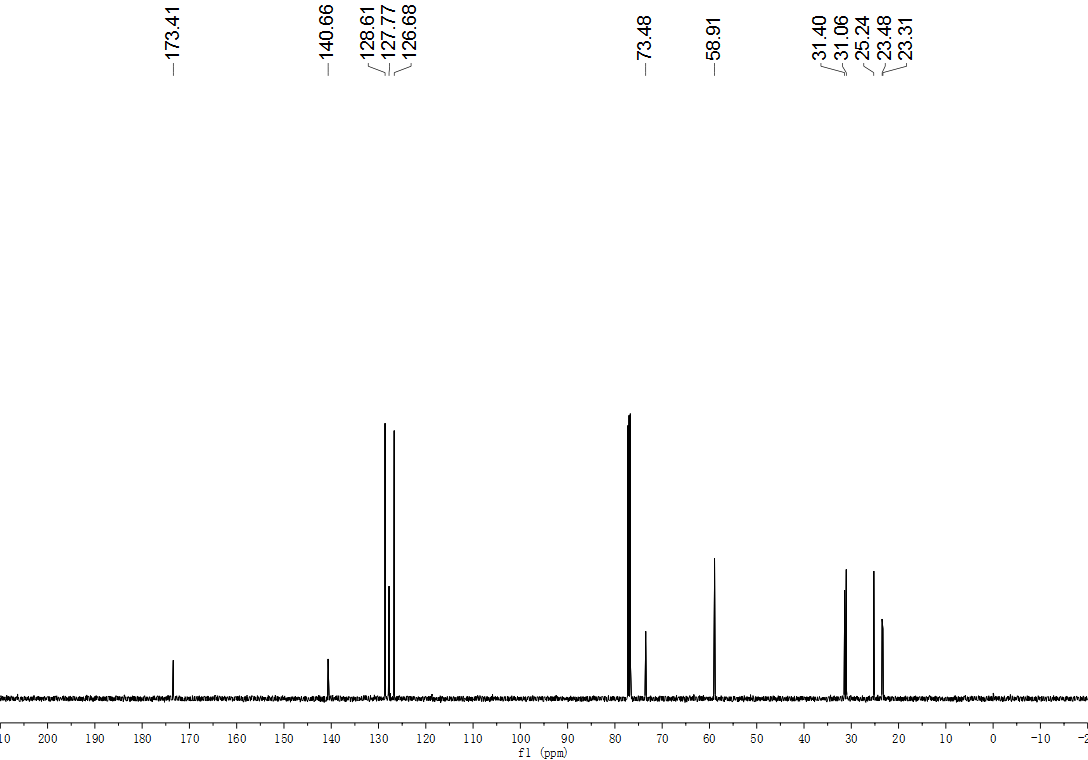


**Fig. S68.** 13C NMR (126 MHz, CDCl3) spectrum of compound **32**.


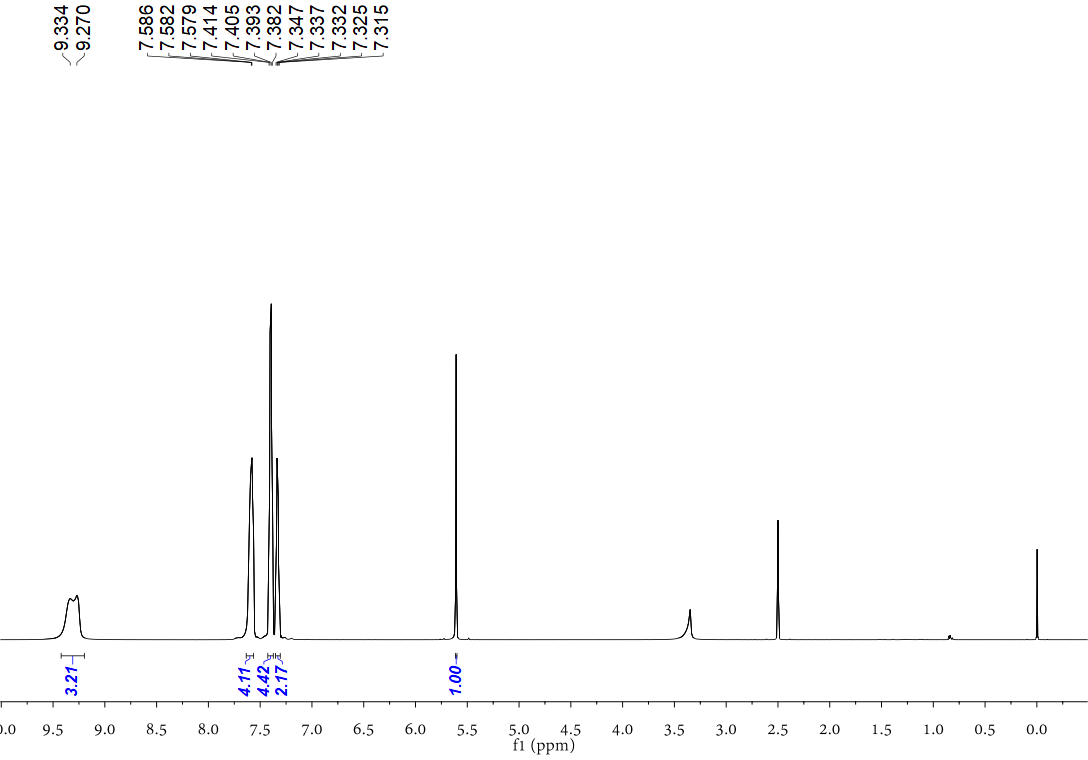


**Fig. S69.** 1H NMR (500 MHz, DMSO) spectrum of compound **33**.


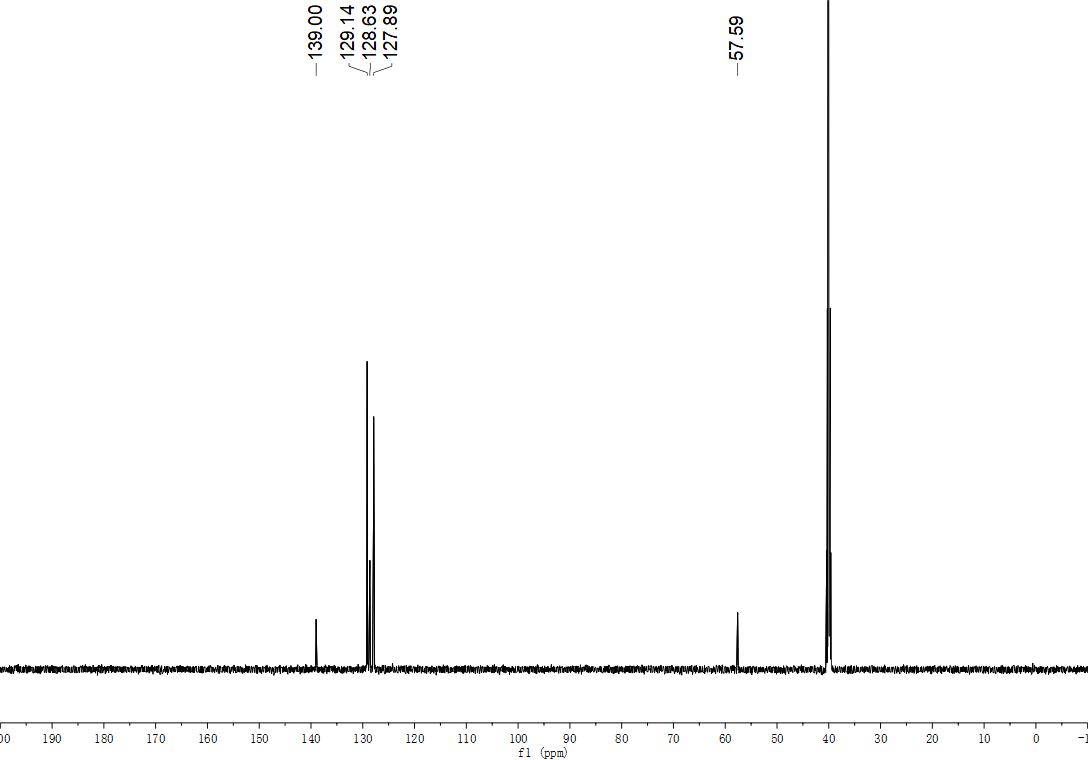


**Fig. S70.** 13C NMR (151 MHz, DMSO) spectrum of compound **33**.


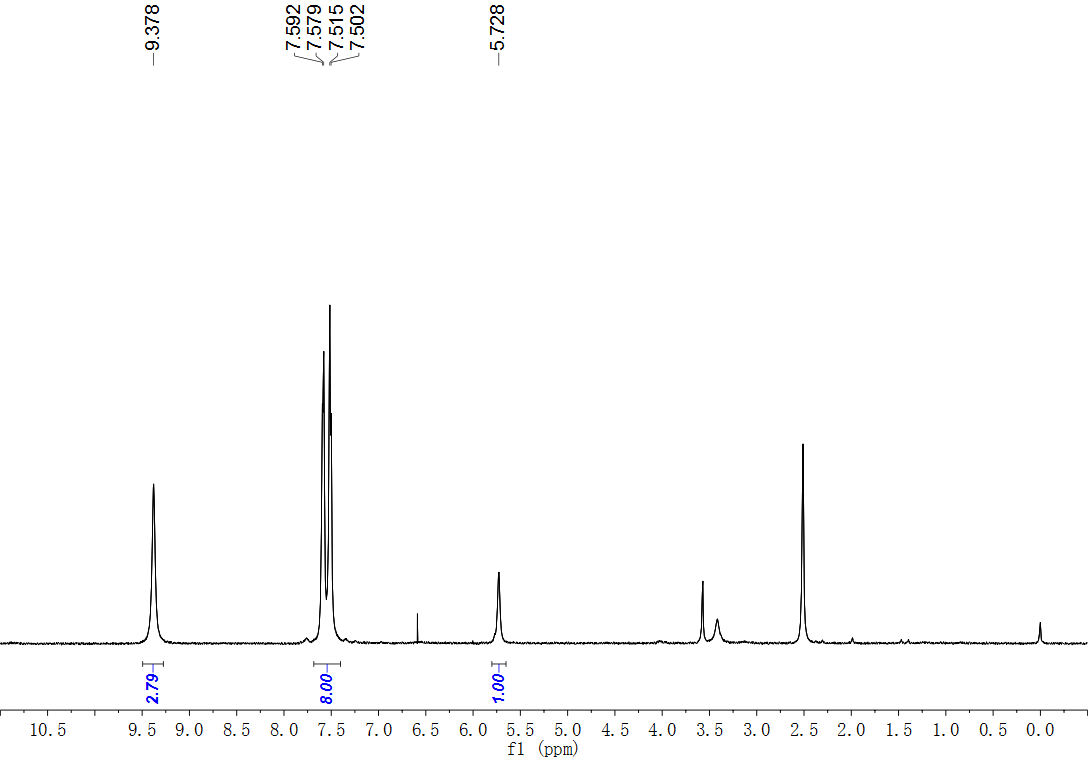


**Fig. S71.** 1H NMR (500 MHz, DMSO) spectrum of compound **34**.


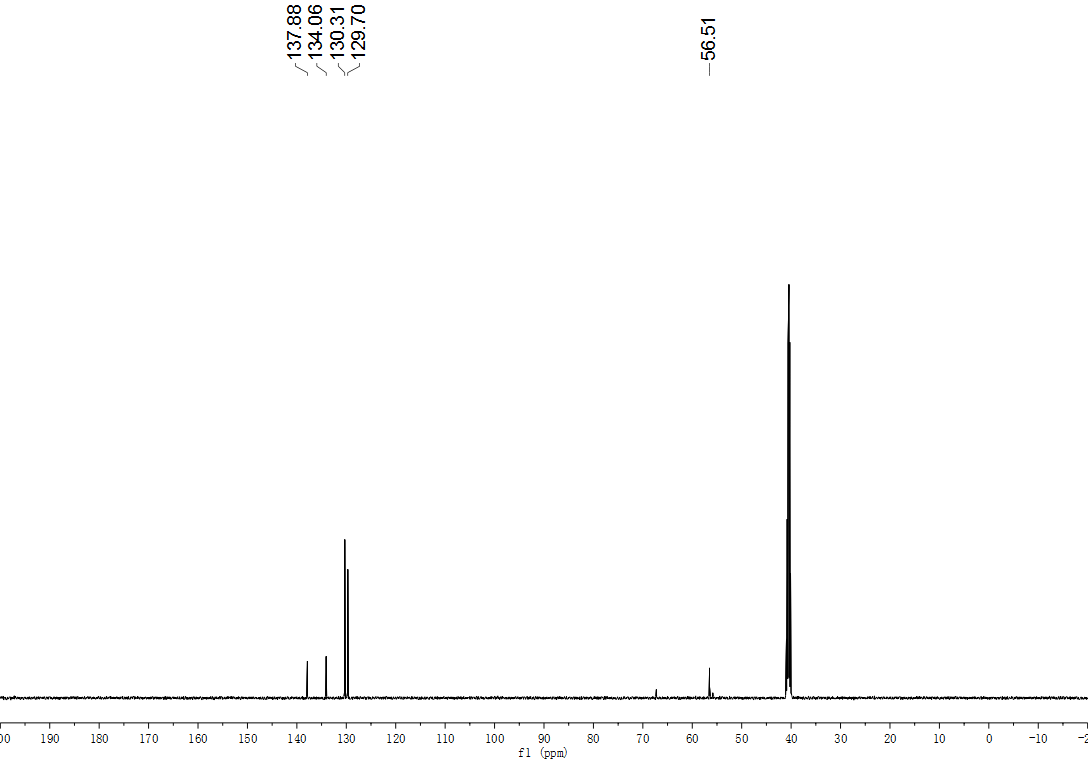


**Fig. S72.** 13C NMR (126 MHz, DMSO) spectrum of compound **34**.


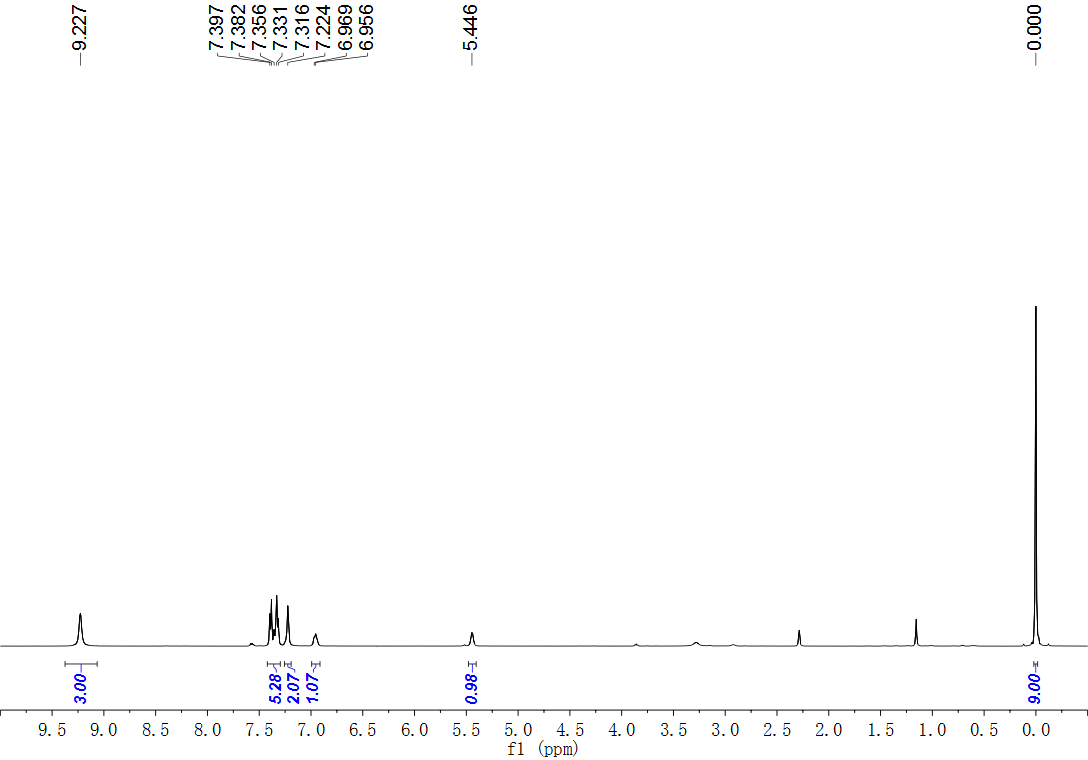


**Fig. S73.** 1H NMR (500 MHz, DMSO) spectrum of compound **36**.


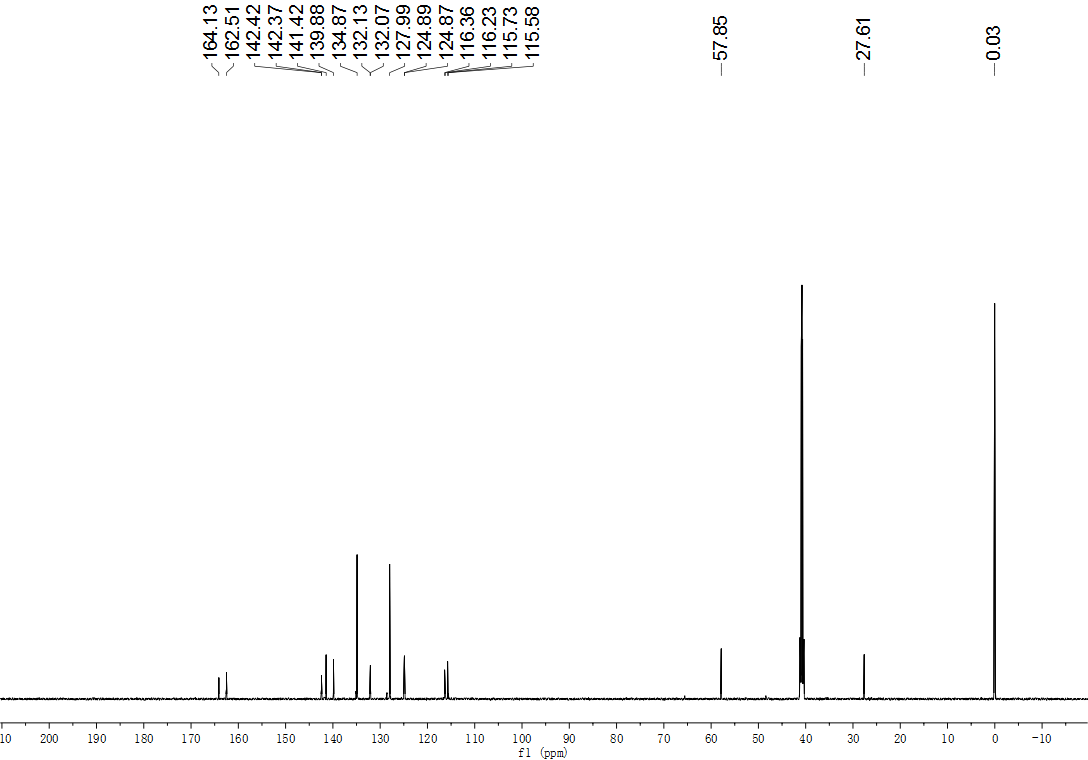


**Fig. S74.** 13C NMR (151 MHz, DMSO) spectrum of compound **36**.


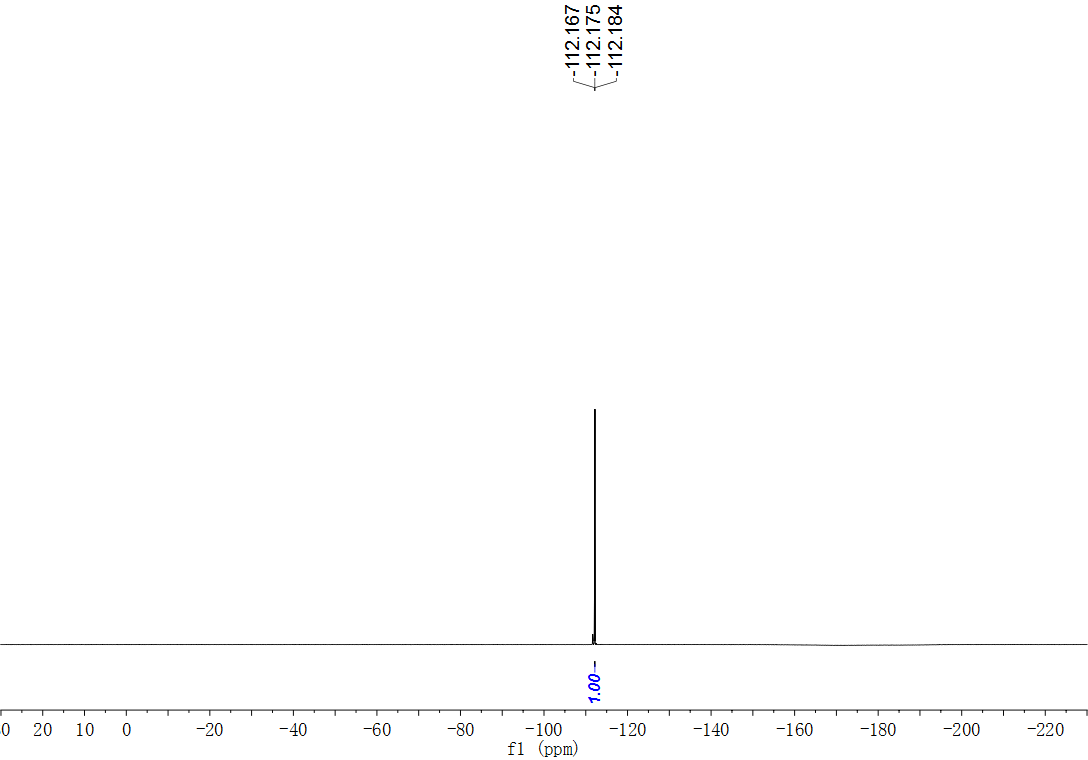


**Fig. S75.** 19F NMR (565 MHz, DMSO) spectrum of compound **36**.


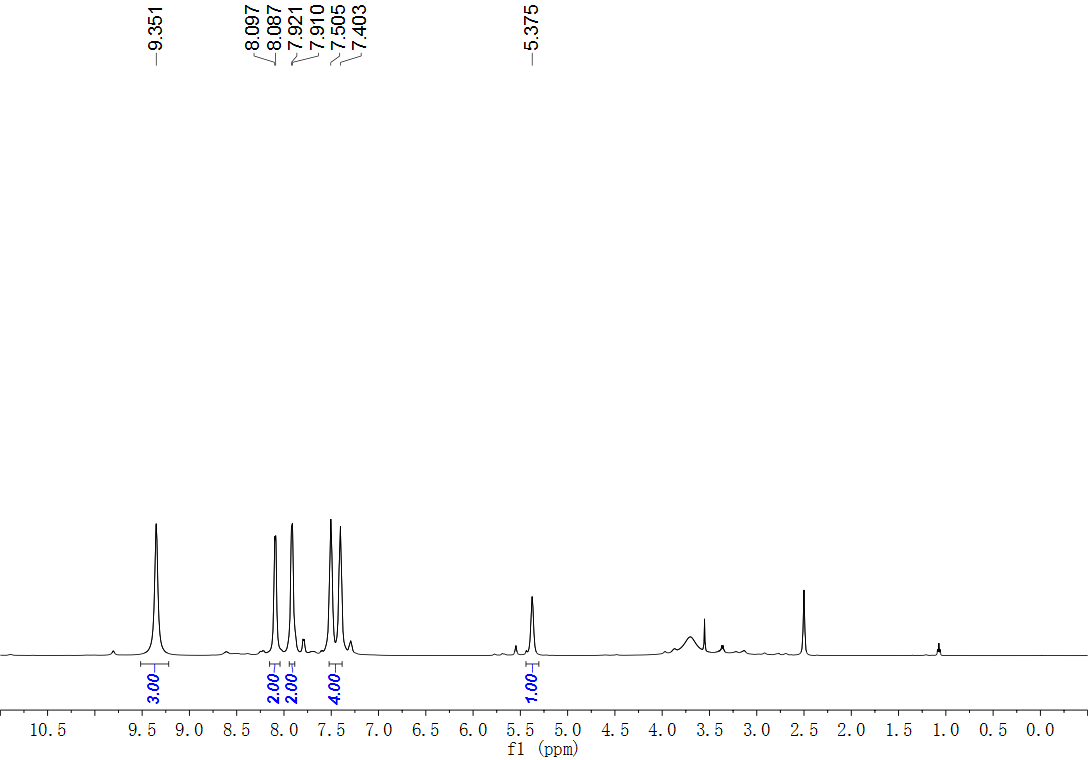


**Fig. S76.** 1H NMR (500 MHz, DMSO) spectrum of compound **37**.


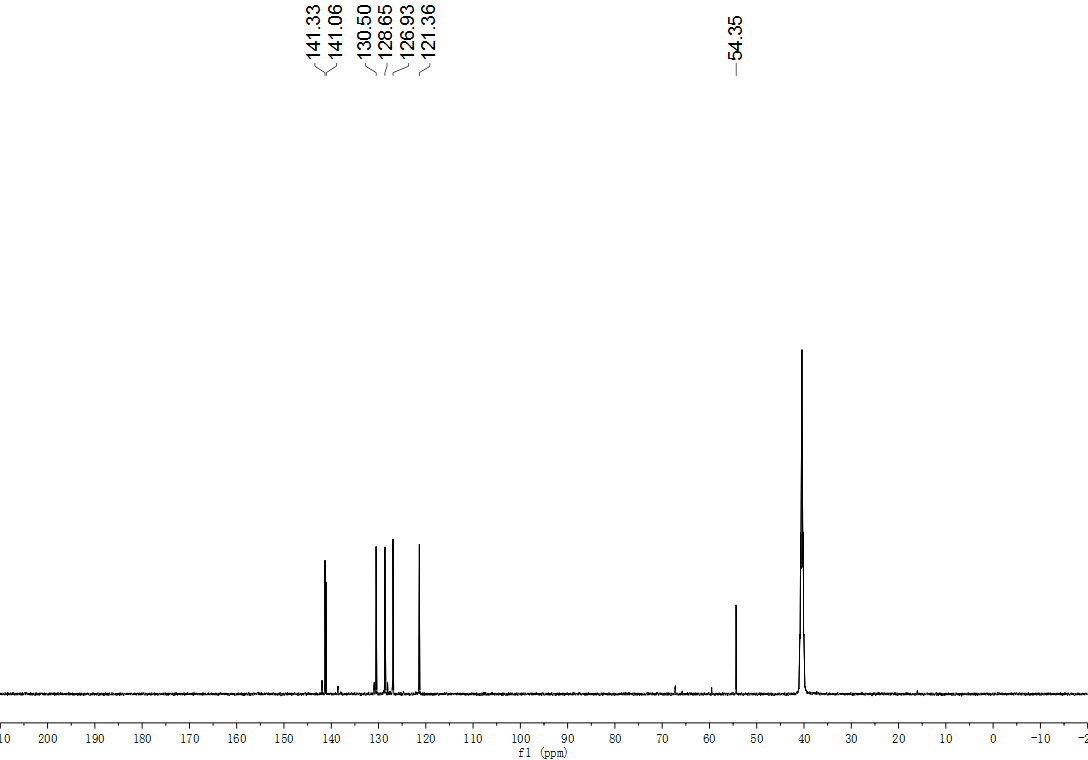


**Fig. S77.** 13C NMR (151 MHz, DMSO) spectrum of compound **37**.


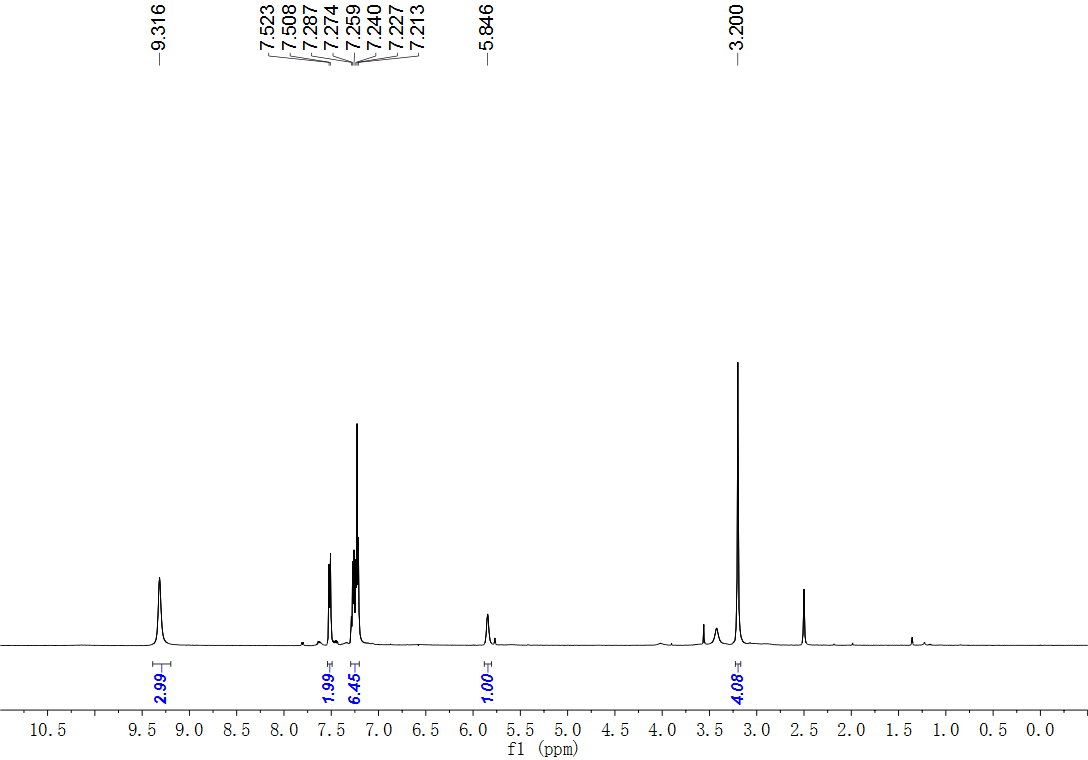


**Fig. S78.** 1H NMR (500 MHz, DMSO) spectrum of compound **38**.


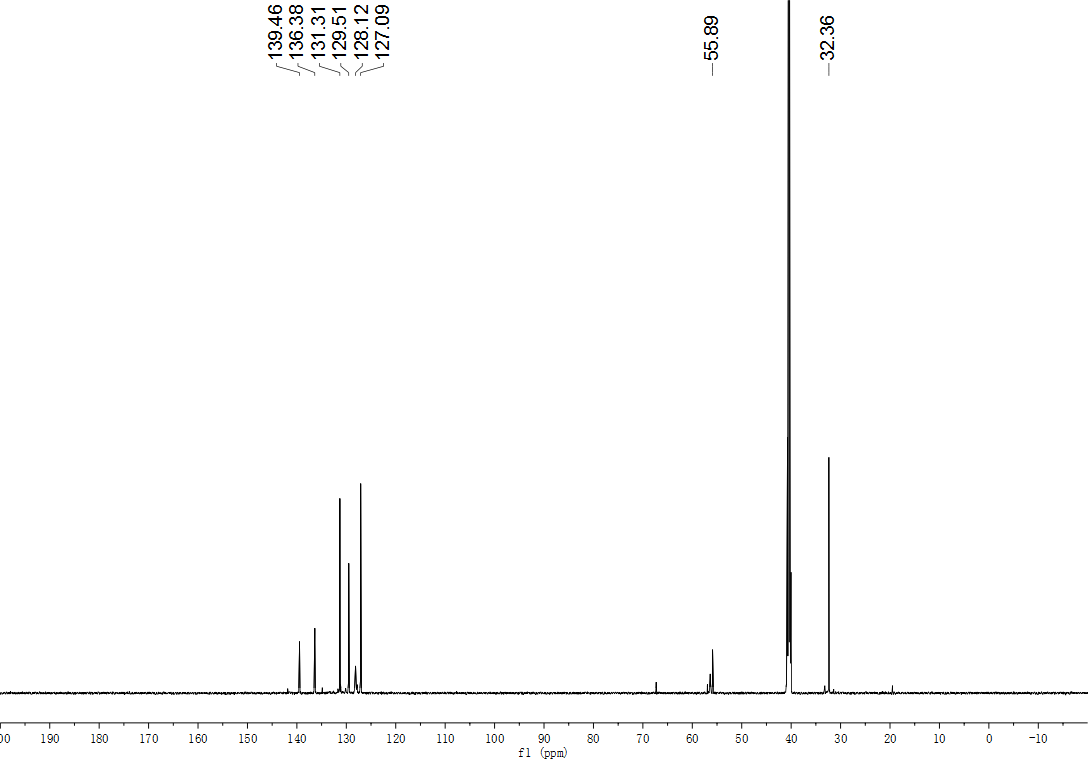


**Fig. S79.** 13C NMR (151 MHz, DMSO) spectrum of compound **38**.


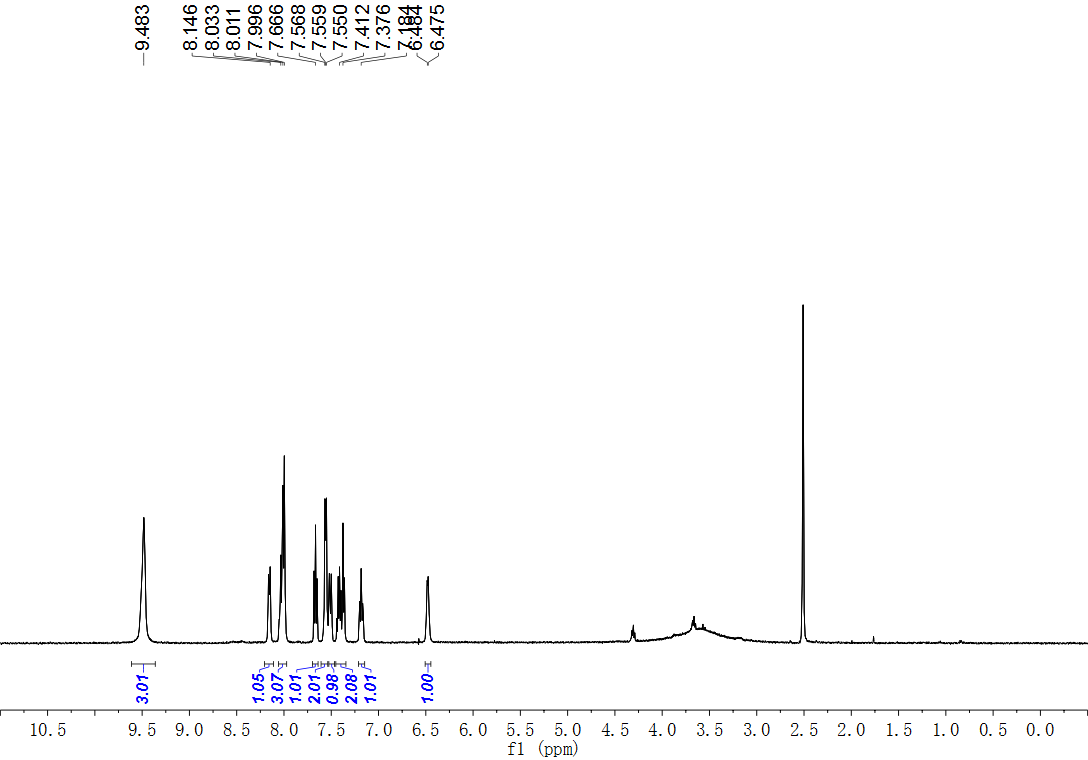


**Fig. S80.** 1H NMR (500 MHz, DMSO) spectrum of compound **39**.


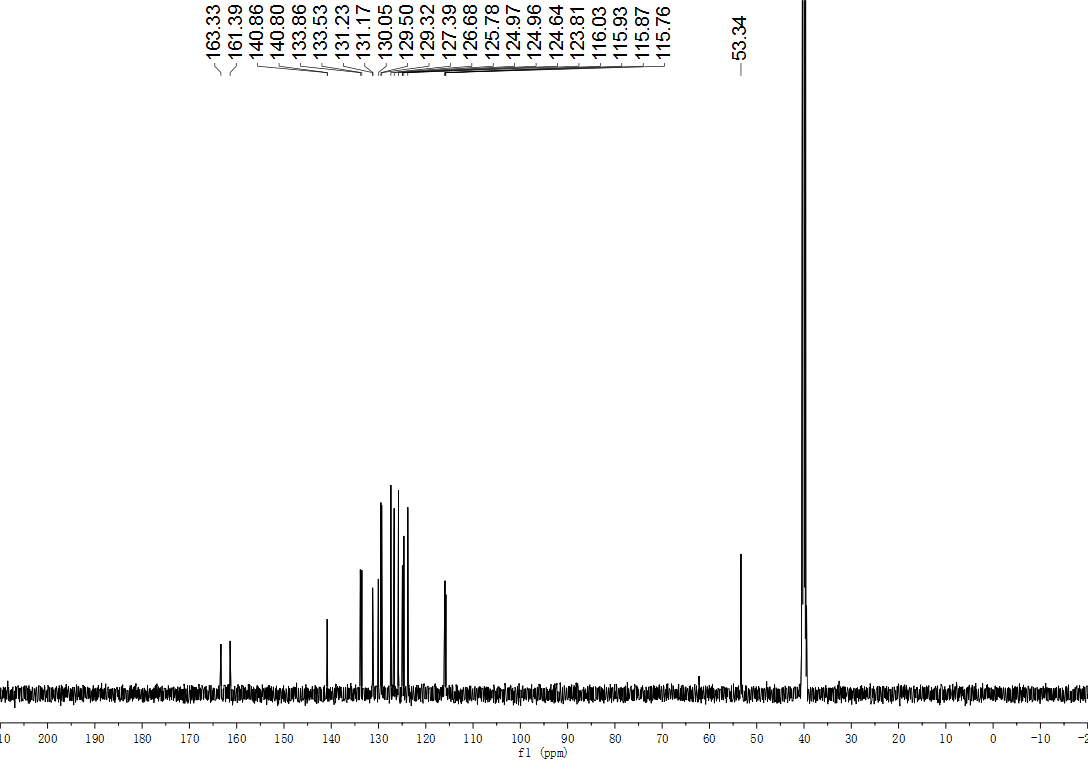


**Fig. S81.** 13C NMR (126 MHz, DMSO) spectrum of compound **39**.


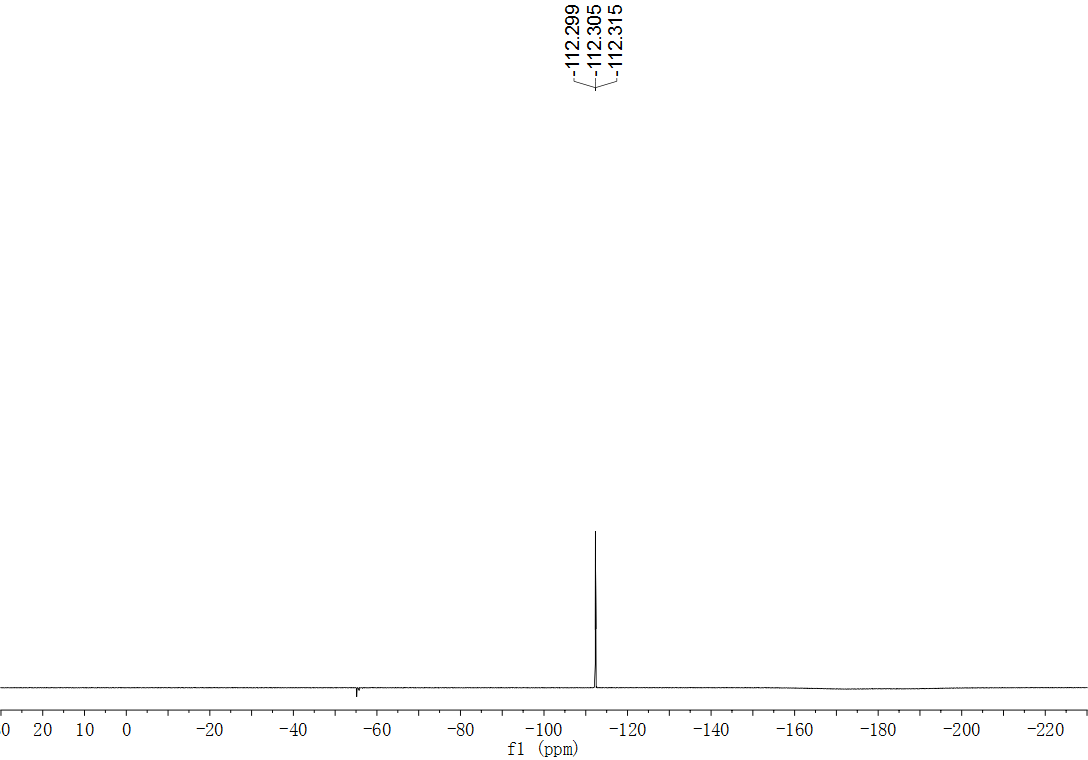


**Fig. S82.** 19F NMR (565 MHz, DMSO) spectrum of compound **39**.


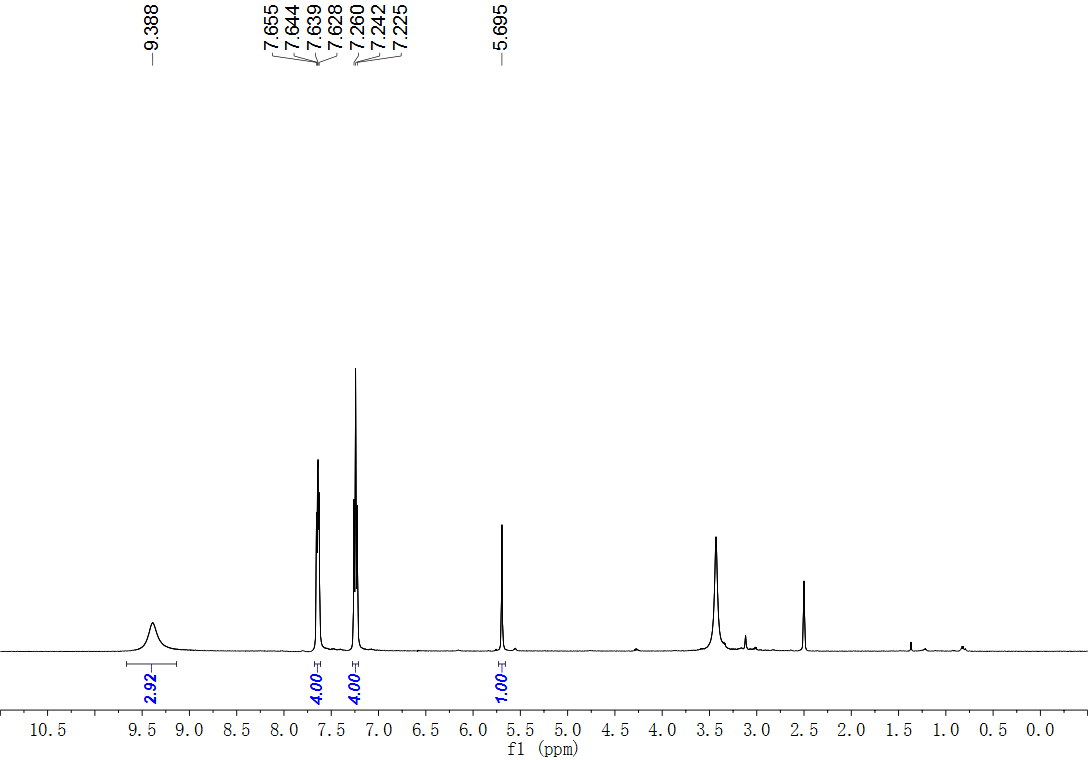


**Fig. S83.** 1H NMR (500 MHz, DMSO) spectrum of compound **40**.


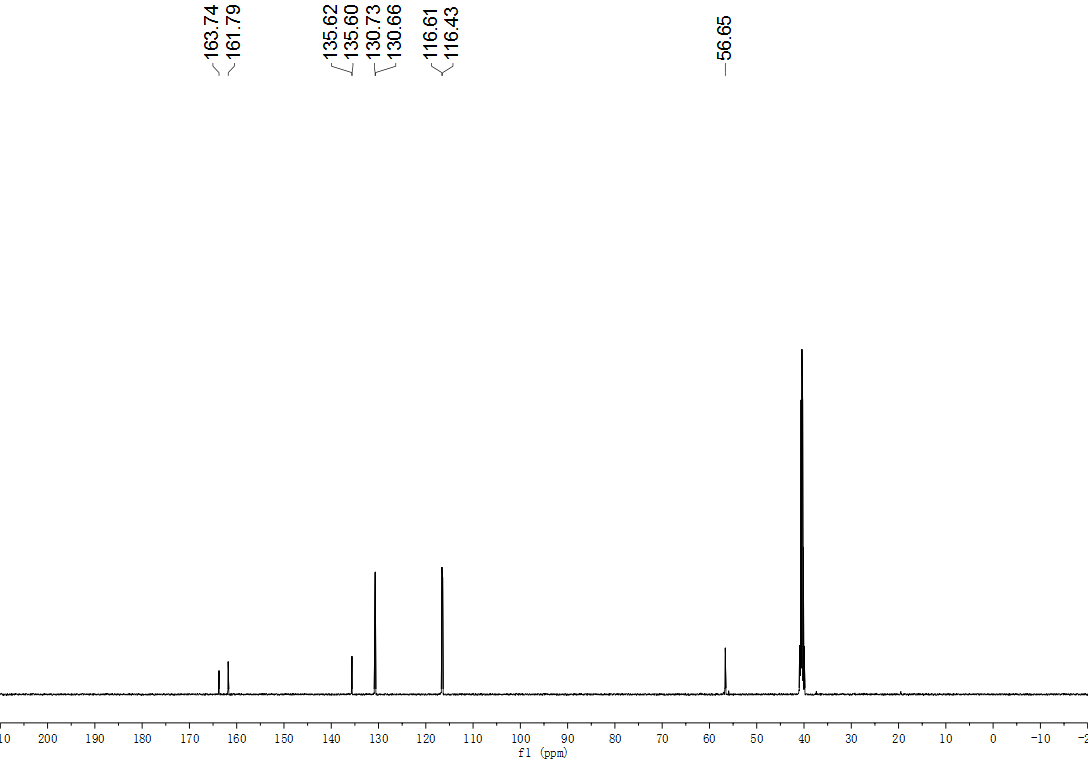


**Fig. S84.** 13C NMR (126 MHz, DMSO) spectrum of compound **40**.


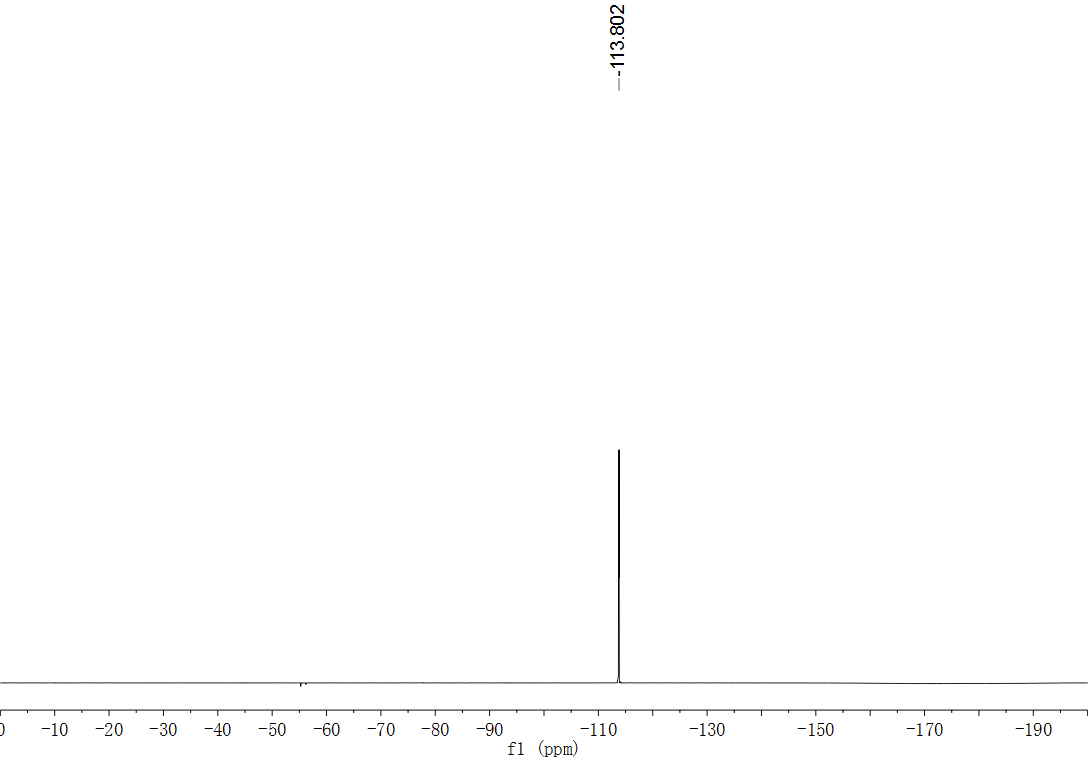


**Fig. S85.** 19F NMR (565 MHz, DMSO) spectrum of compound **40**.


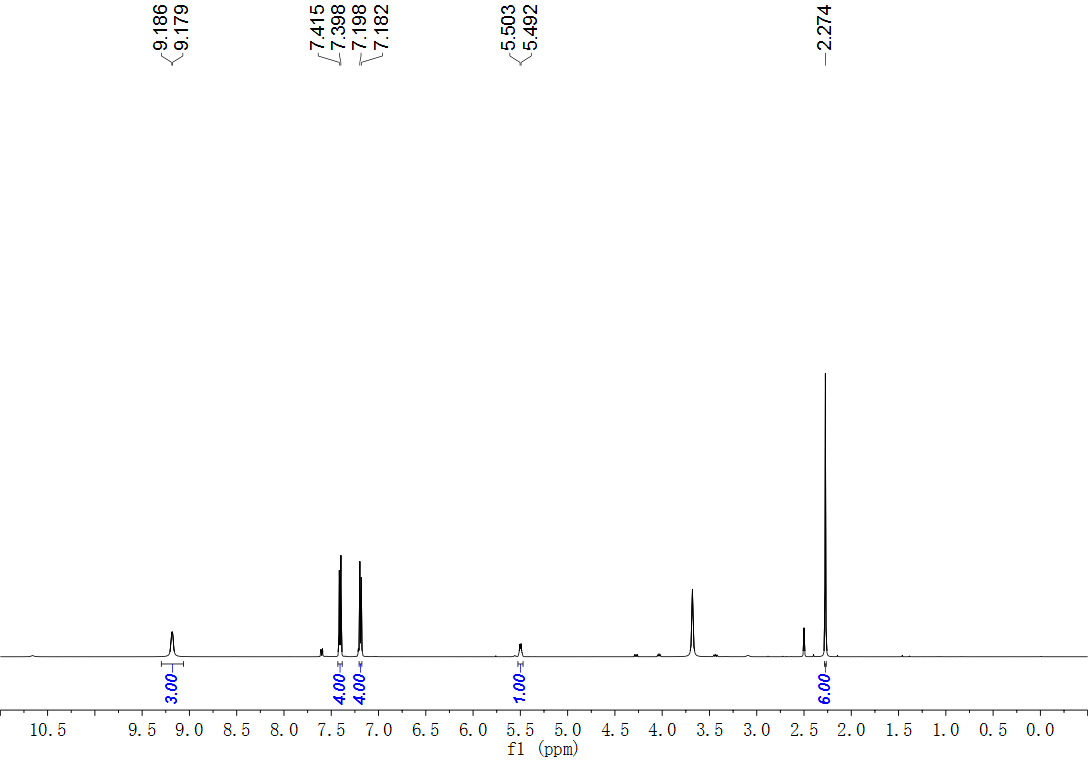


**Fig. S86.** 1H NMR (500 MHz, DMSO) spectrum of compound **41**.


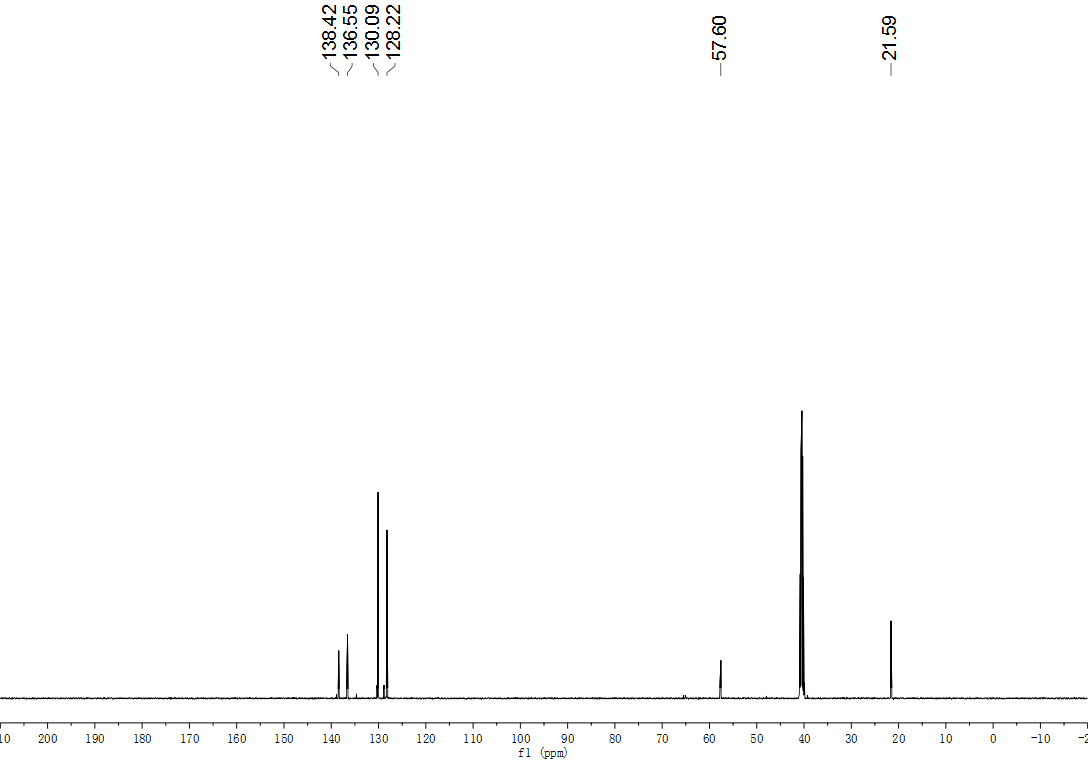


**Fig. S87.** 13C NMR (126 MHz, DMSO) spectrum of compound **41**.


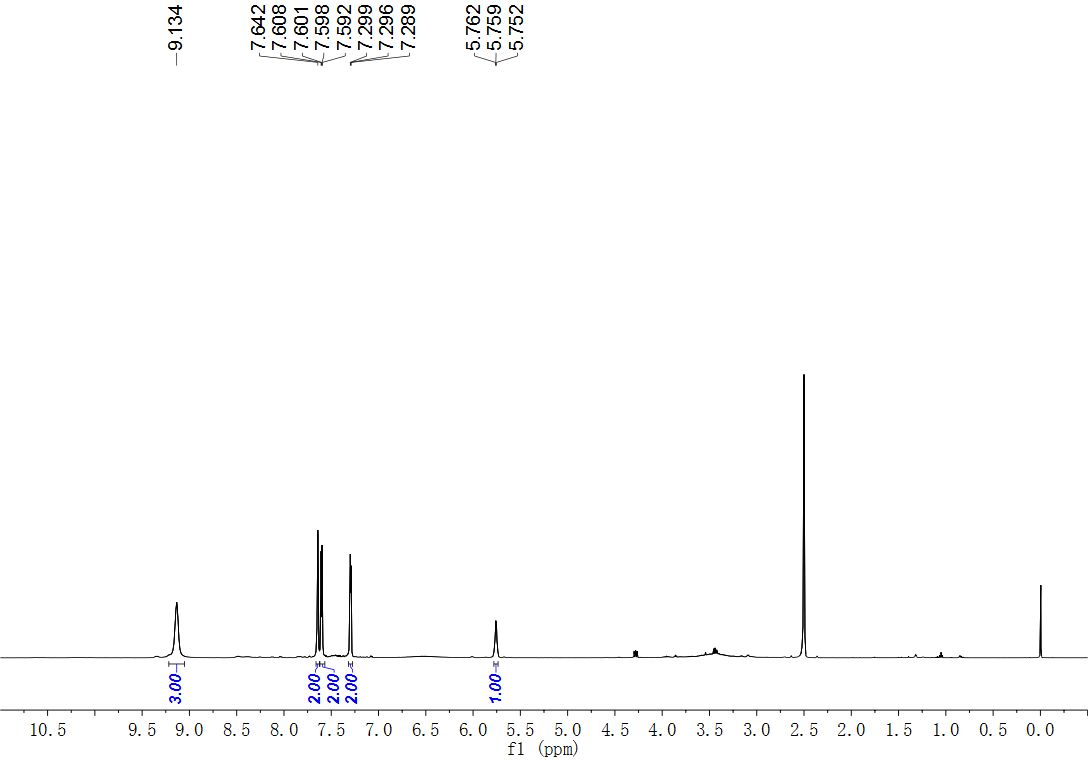


**Fig. S88.** 1H NMR (500 MHz, DMSO) spectrum of compound **42**.


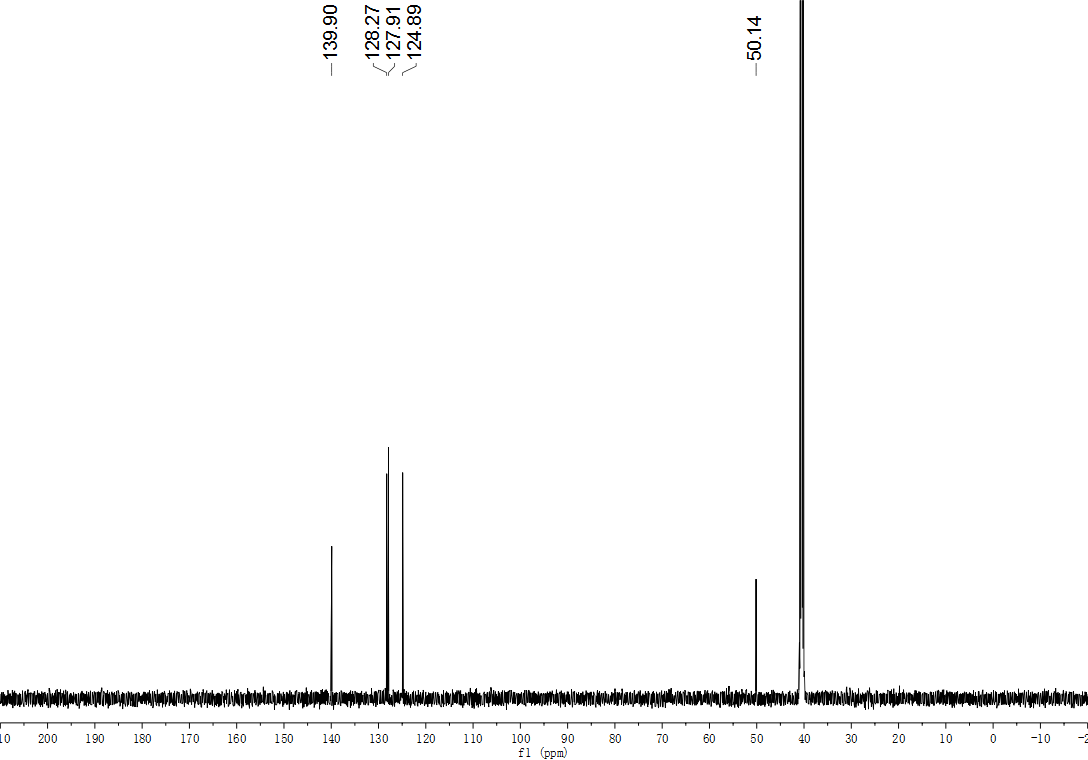


**Fig. S89.** 13C NMR (126 MHz, DMSO) spectrum of compound **42**.


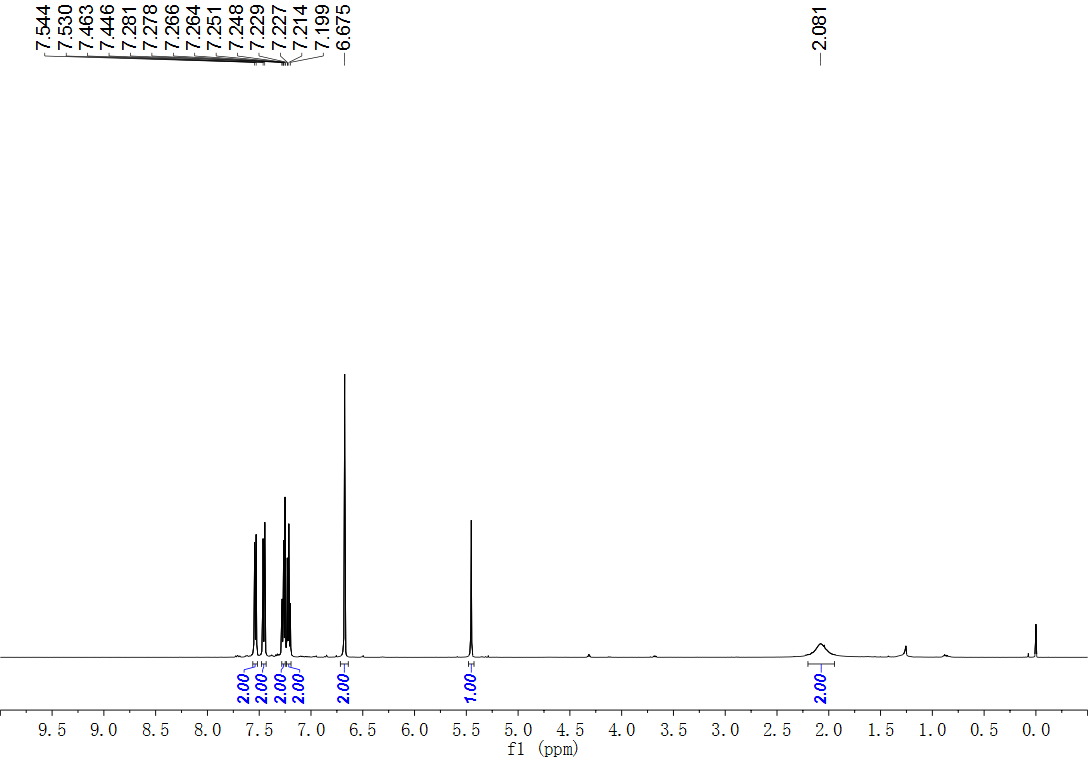


**Fig. S90.** 1H NMR (500 MHz, CDCl3) spectrum of compound **43**.


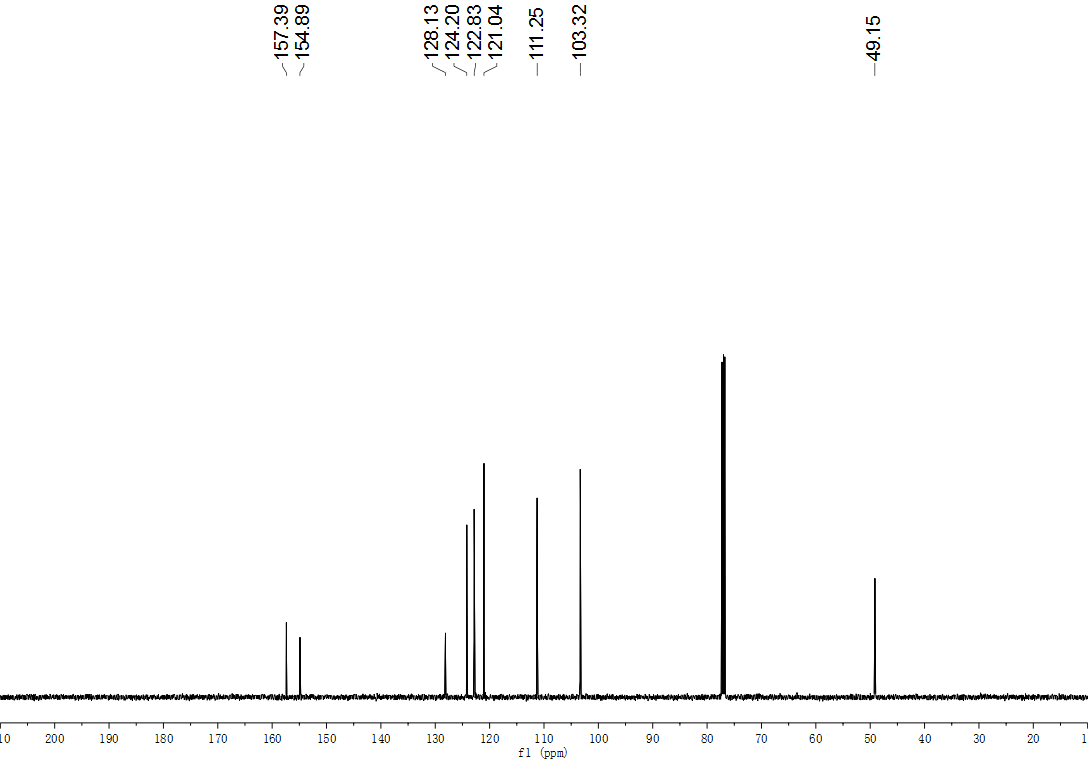


**Fig. S91.** 13C NMR (126 MHz, CDCl3) spectrum of compound **43**.


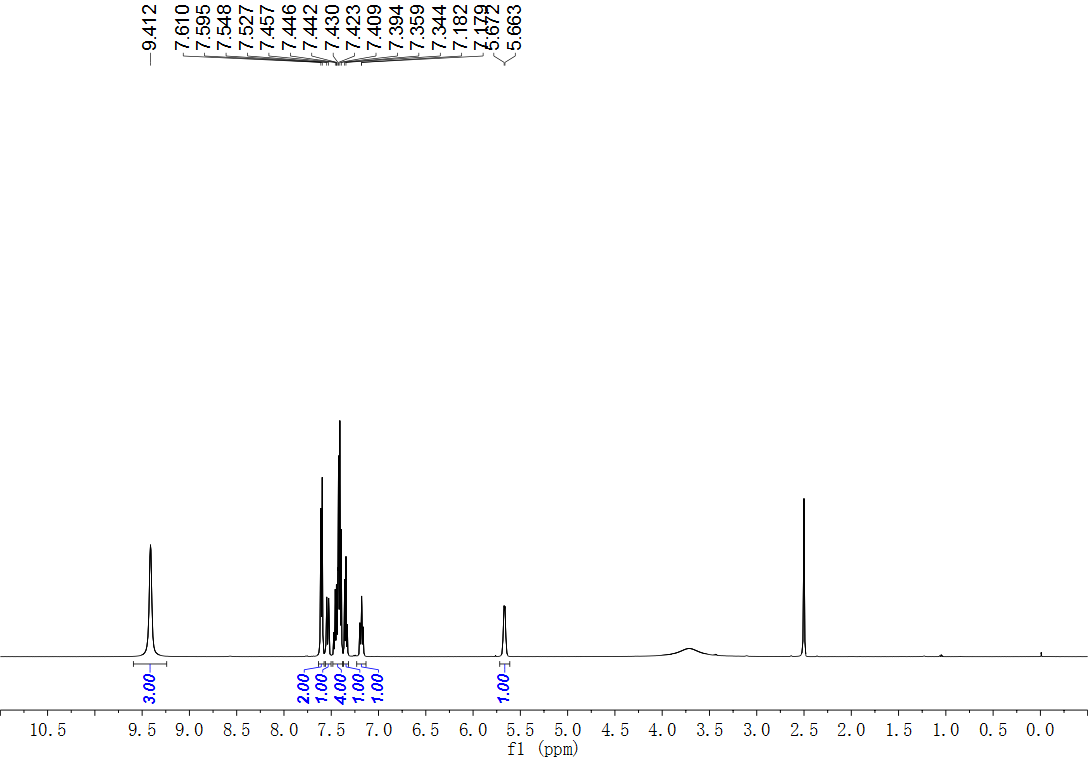


**Fig. S92.** 1H NMR (500 MHz, DMSO) spectrum of compound **44**.


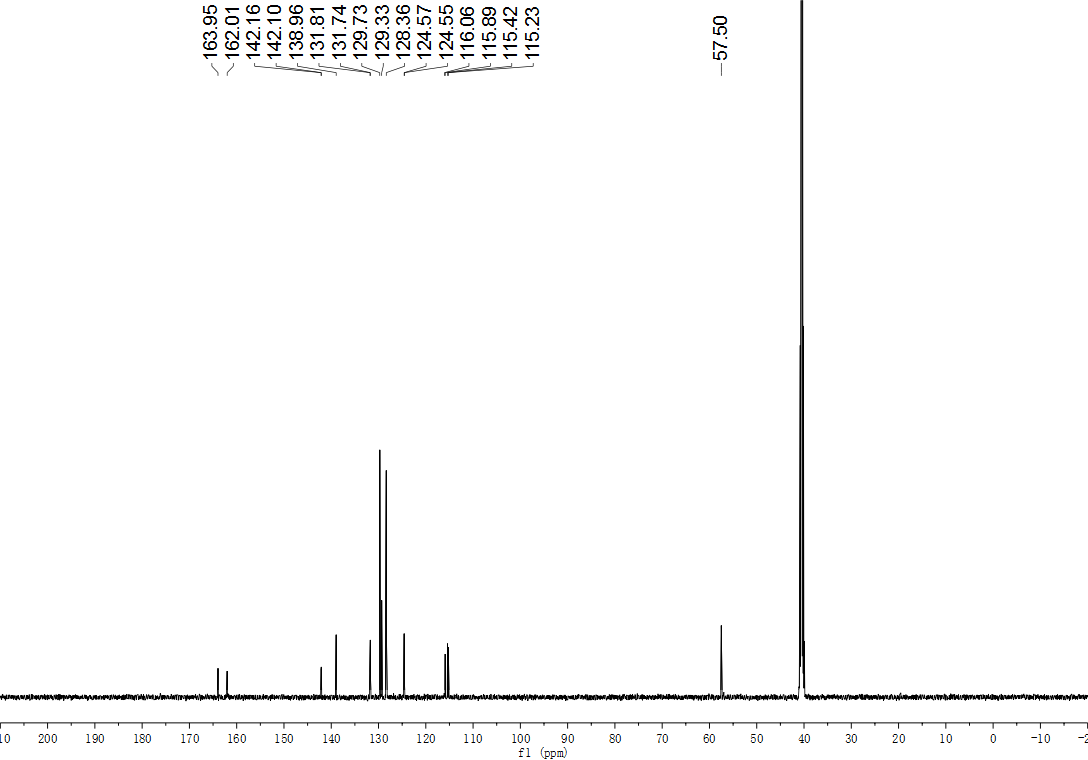


**Fig. S93.** 13C NMR (126 MHz, DMSO) spectrum of compound **44**.


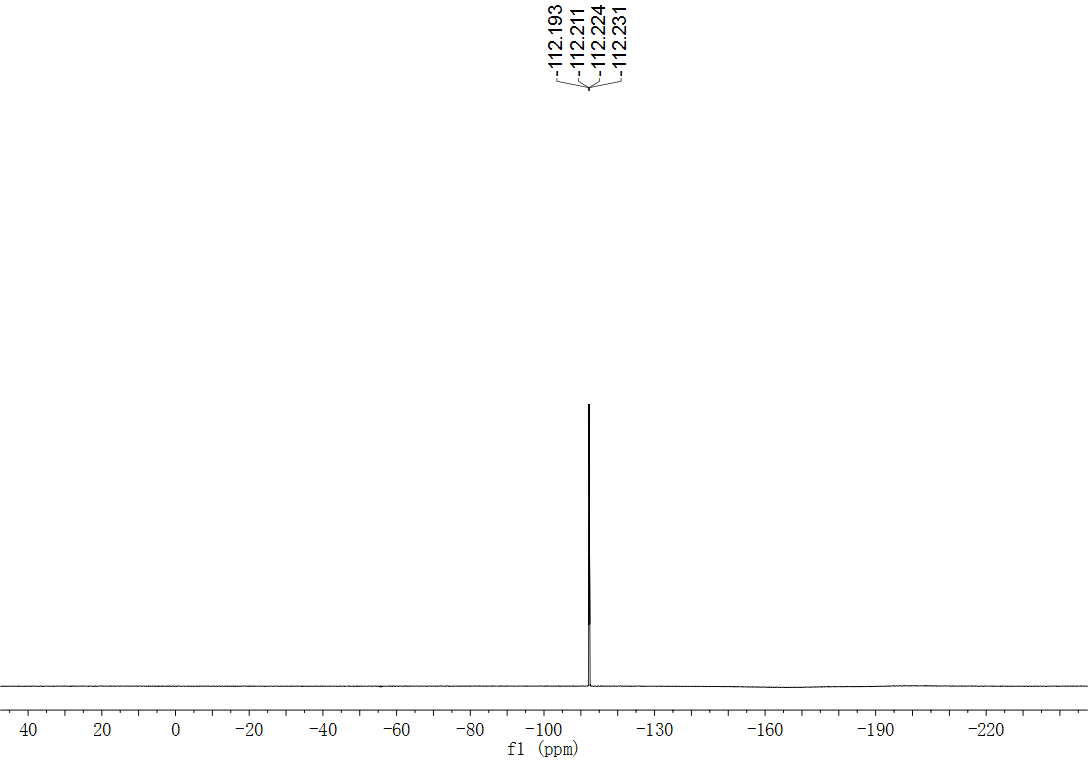


**Fig. S94.** 19F NMR (565 MHz, DMSO) spectrum of compound **44**.


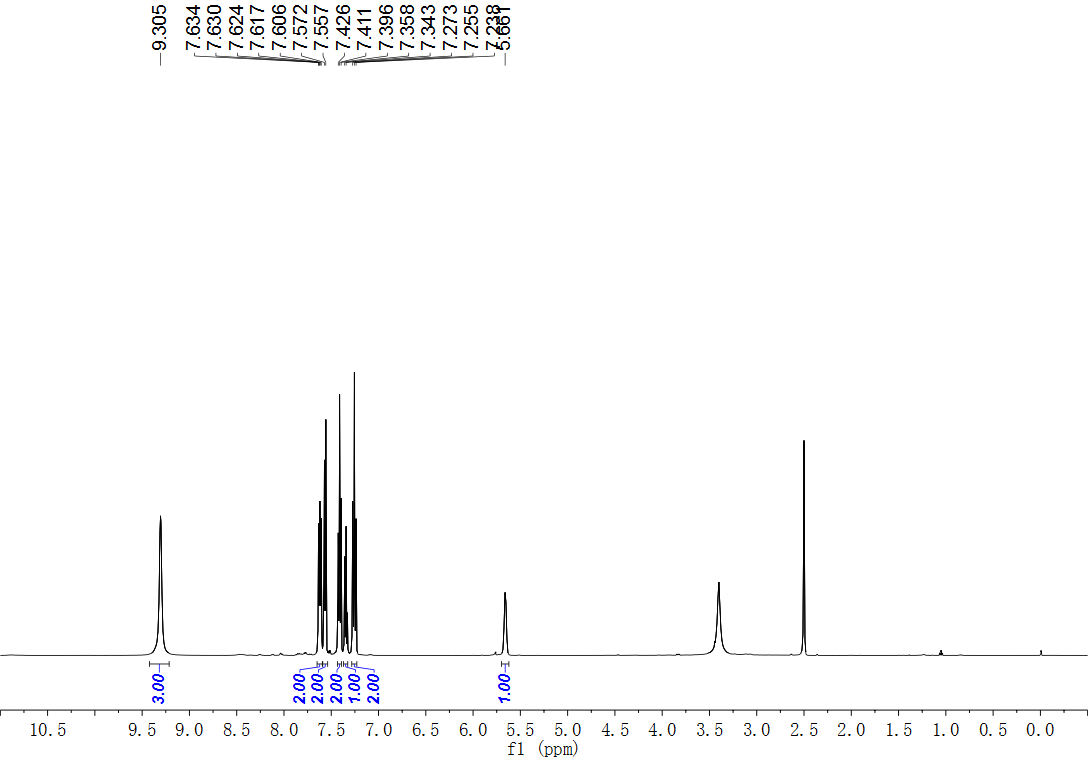


**Fig. S95.** 1H NMR (500 MHz, DMSO) spectrum of compound **45**.


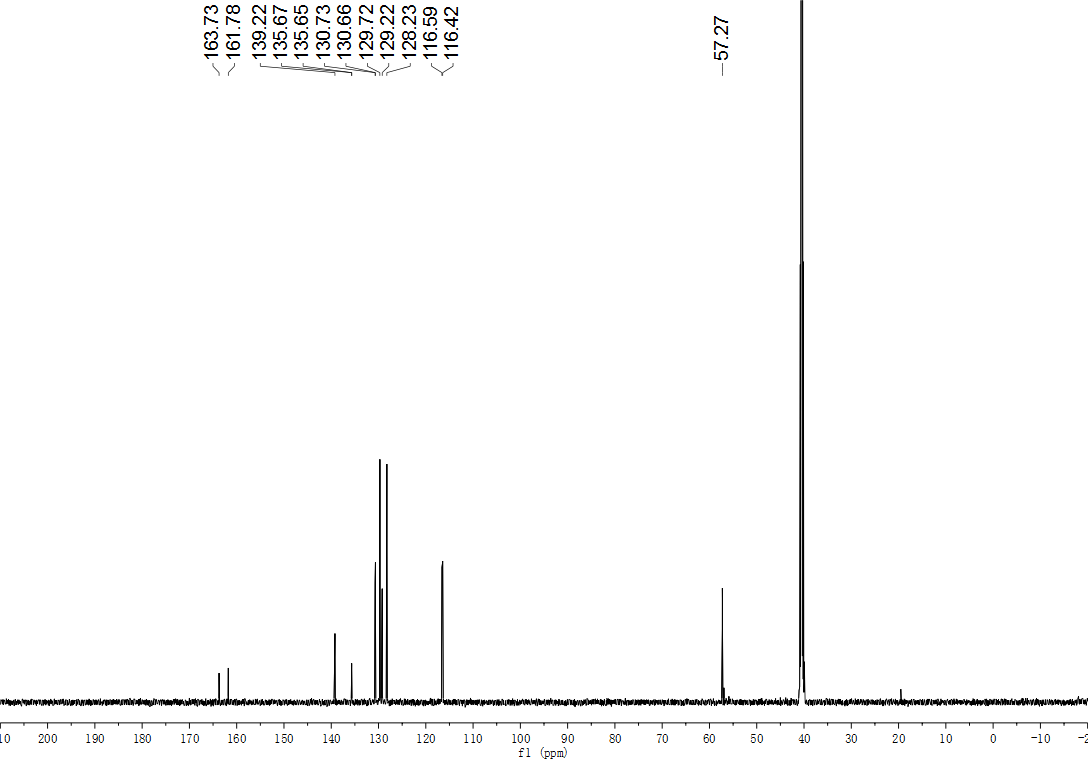


**Fig. S96.** 13C NMR (126 MHz, DMSO) spectrum of compound **45**.


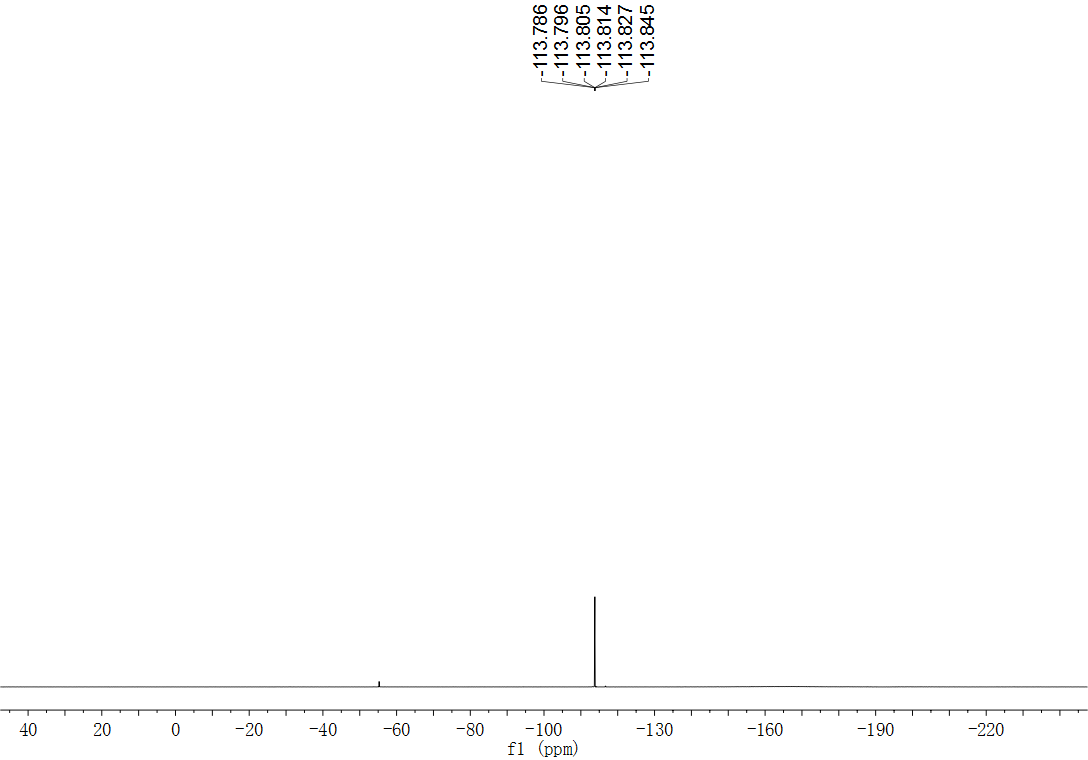


**Fig. S97.** 19F NMR (471 MHz, DMSO) spectrum of compound **45**.


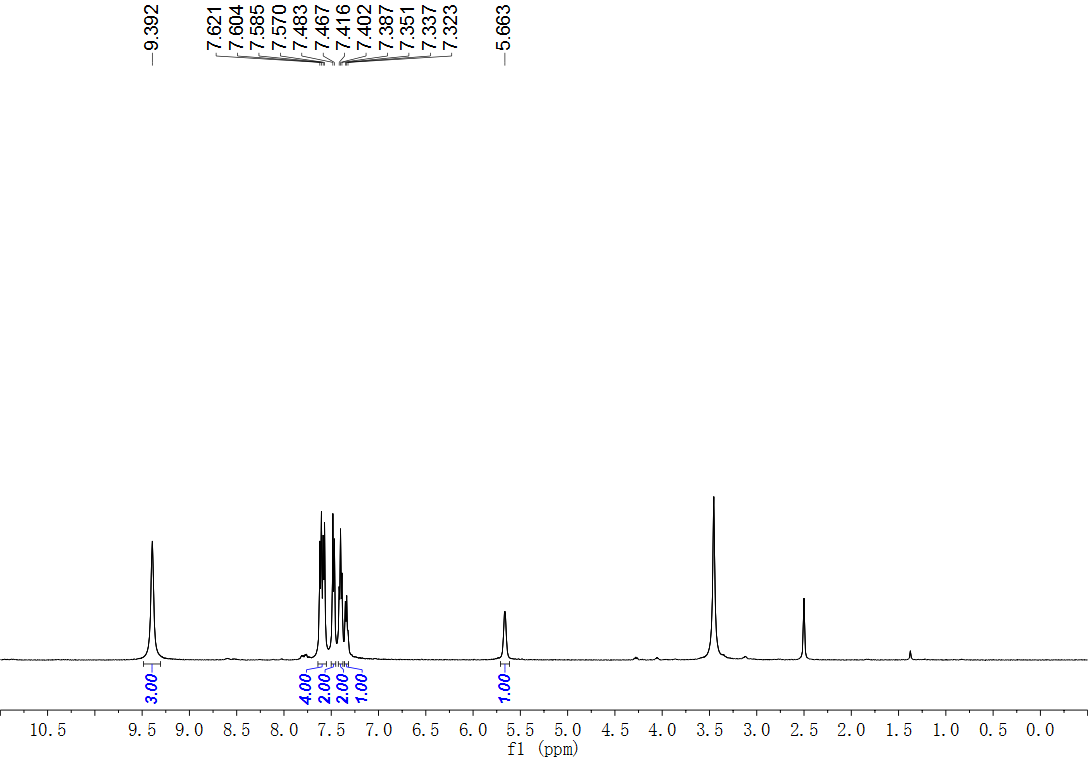


**Fig. S98.** 1H NMR (500 MHz, DMSO) spectrum of compound **46**.


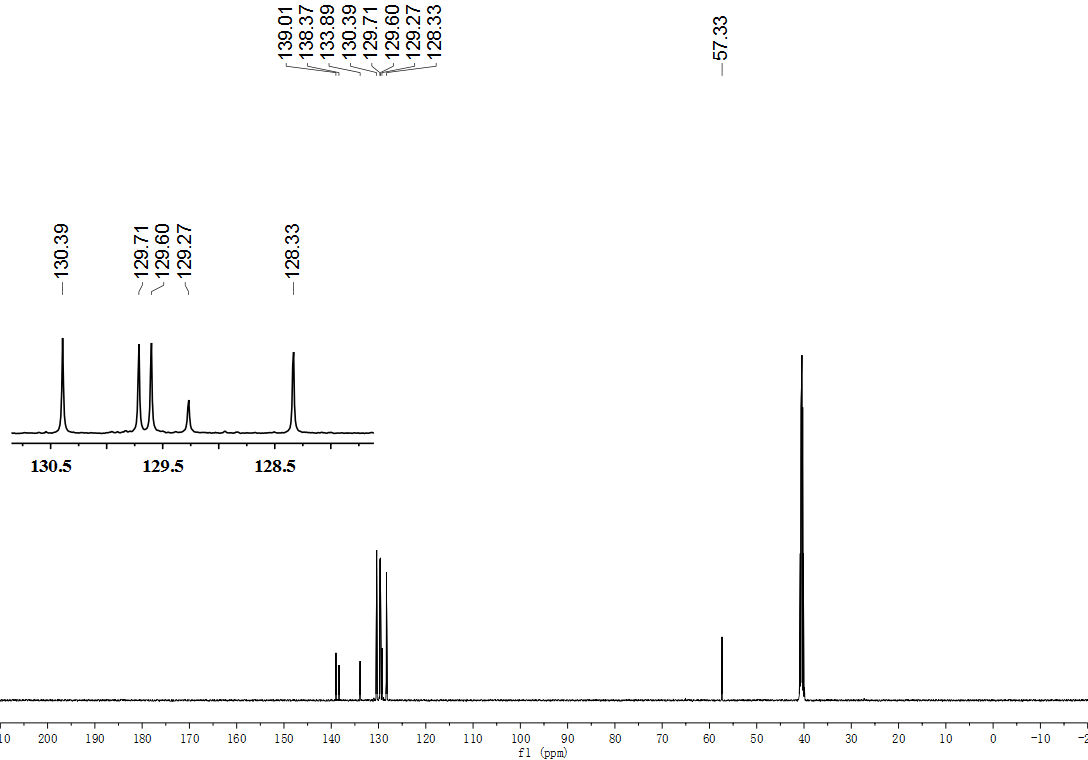


**Fig. S99.** 13C NMR (126 MHz, DMSO) spectrum of compound **46**.


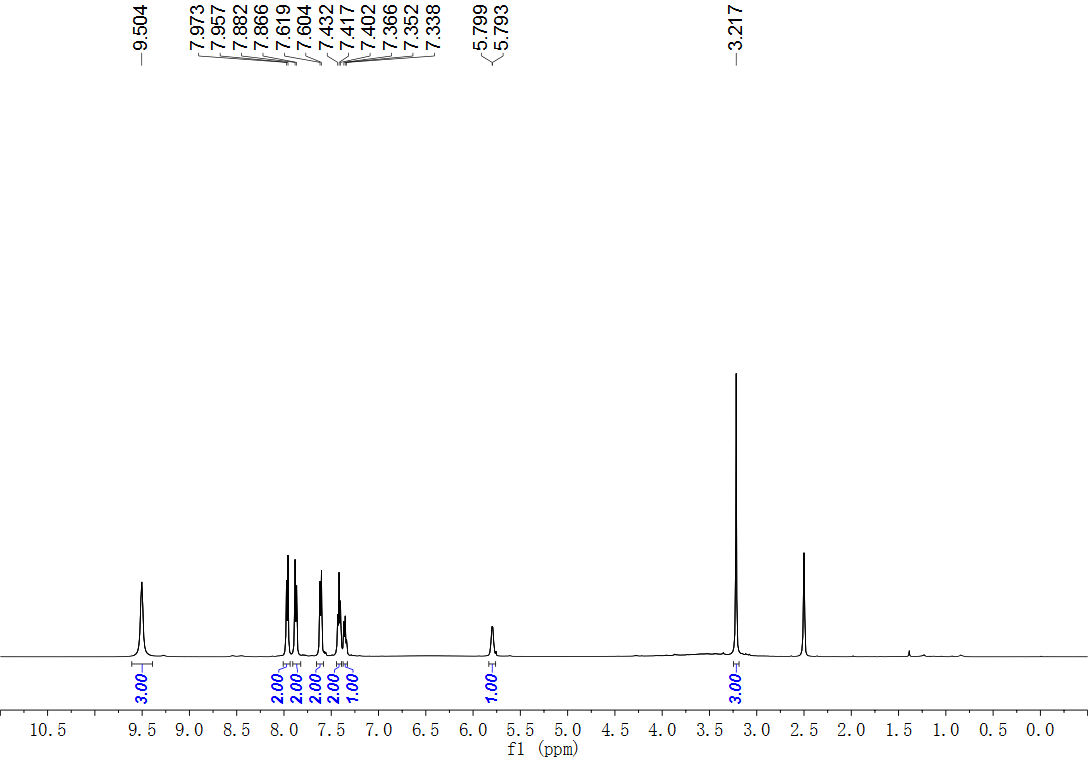


**Fig. S100.** 1H NMR (500 MHz, DMSO) spectrum of compound **47**.


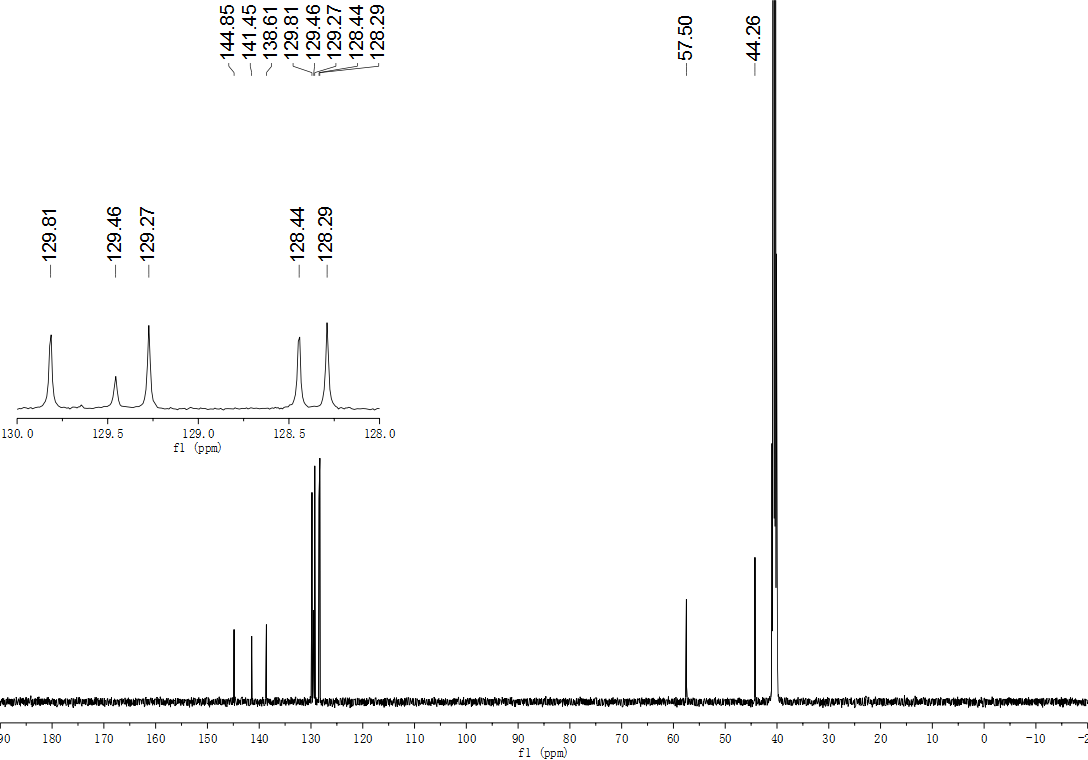


**Fig. S101.** 13C NMR (126 MHz, DMSO) spectrum of compound **47**.


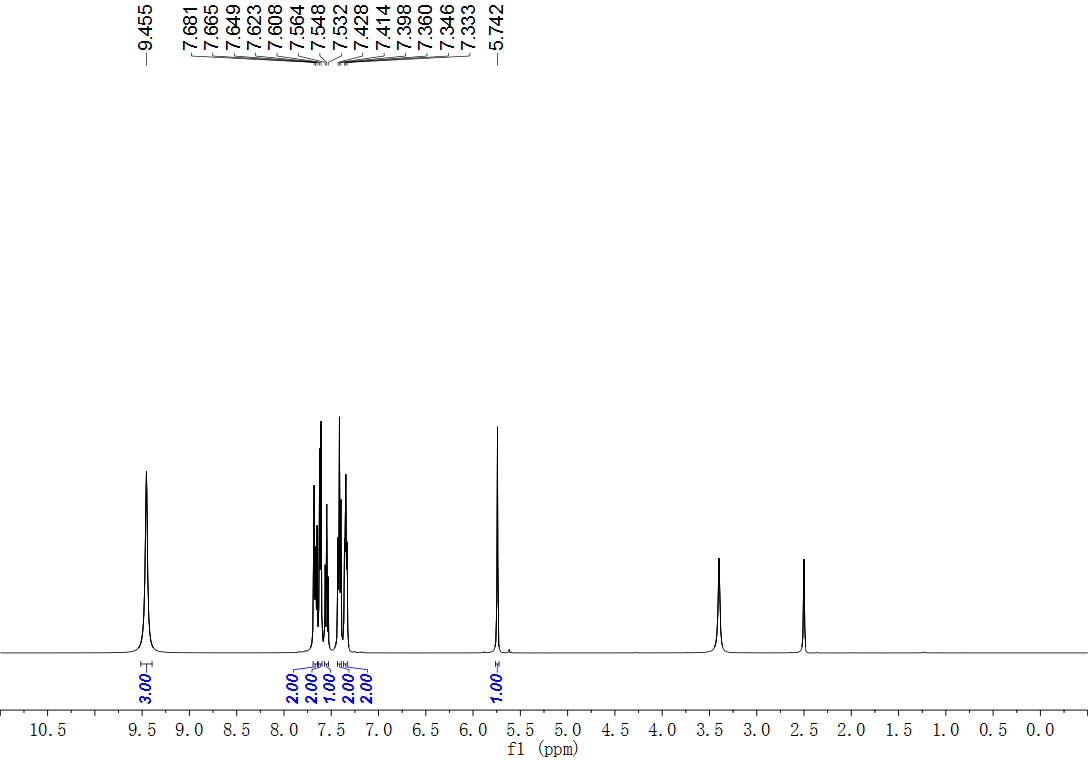


**Fig. S102.** 1H NMR (500 MHz, DMSO) spectrum of compound **48**.


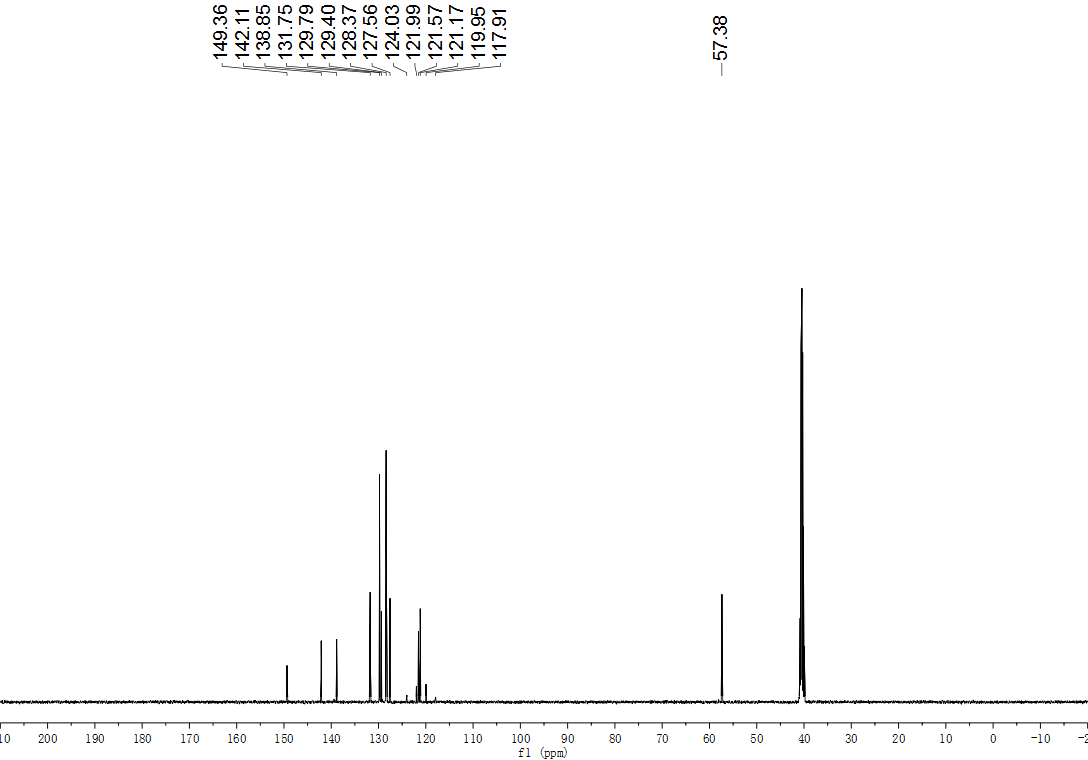


**Fig. S103.** 13C NMR (126 MHz, DMSO) spectrum of compound **48**.


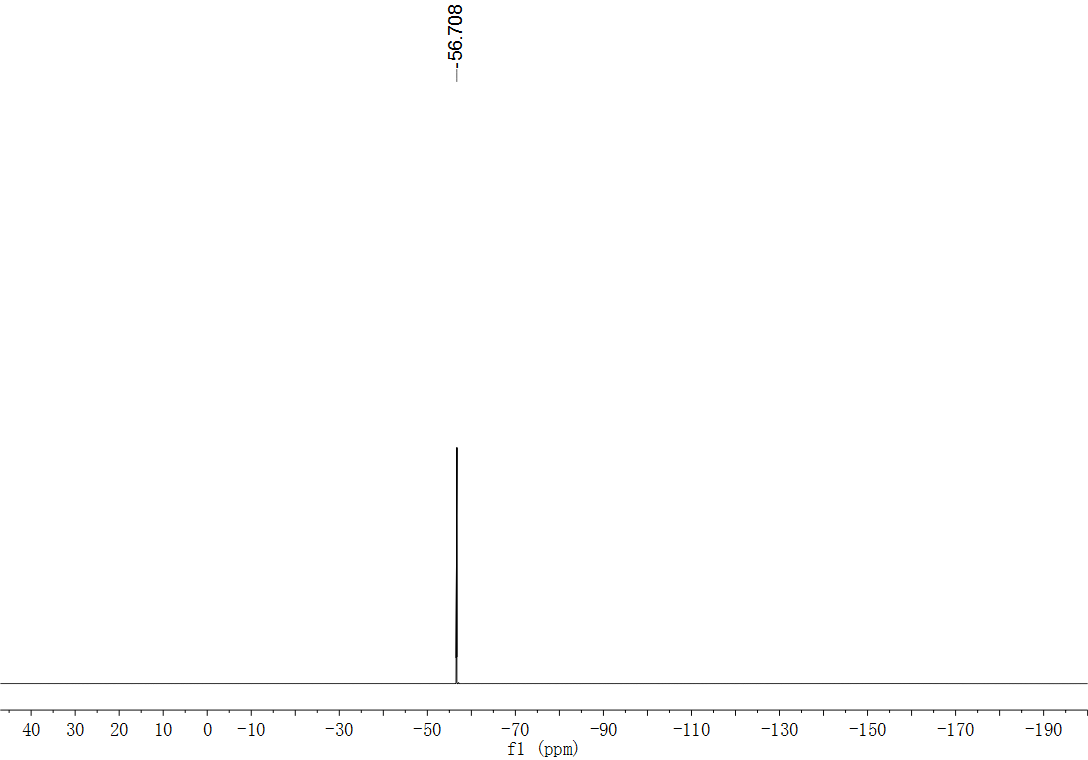


**Fig. S104.** 19F NMR (471 MHz, DMSO) spectrum of compound **48**.


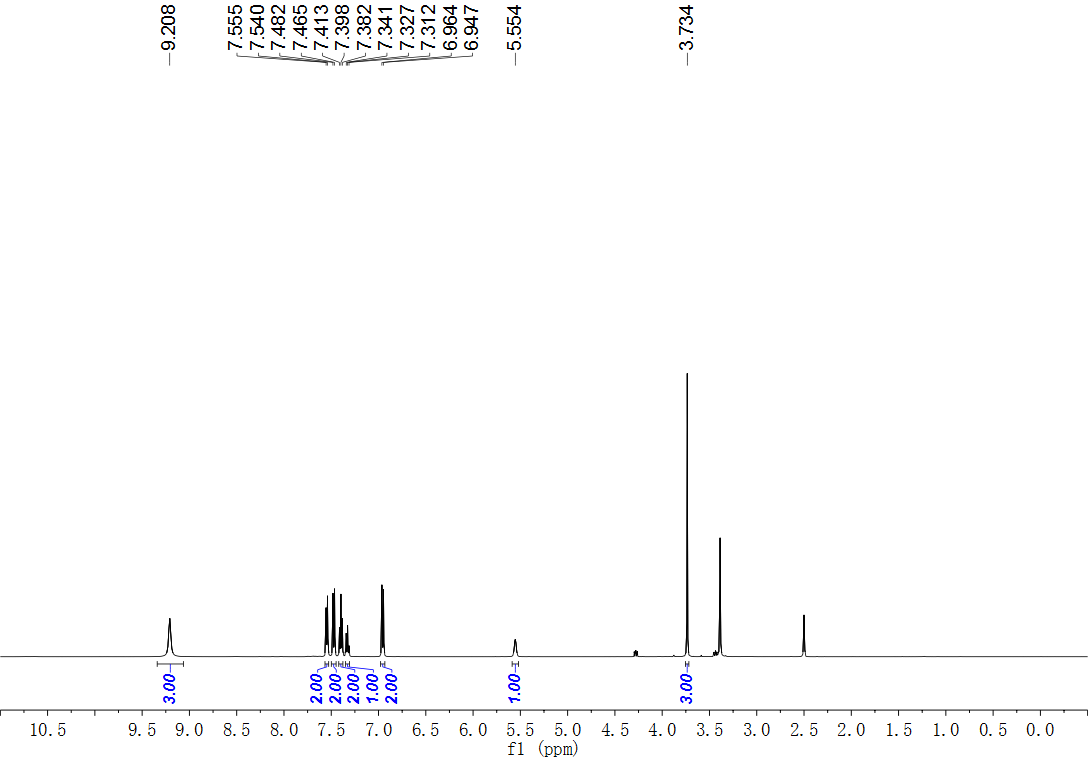


**Fig. S105.** 1H NMR (500 MHz, DMSO) spectrum of compound **49**.

**Fig. S106.** 13C NMR (151 MHz, DMSO) spectrum of compound **49**.

**Fig. S107.** 1H NMR (500 MHz, CDCl3) spectrum of compound **50**.

**Fig. S108.** 13C NMR (151MHz, CDCl3) spectrum of compound **50**.

**Fig. S109.** 1H NMR (500 MHz, DMSO) spectrum of compound **51**.

**Fig. S110.** 13C NMR (126 MHz, DMSO) spectrum of compound **51**.

**Fig. S111.** 1H NMR (500 MHz, DMSO) spectrum of compound **52**.

**Fig. S112.** 13C NMR (126 MHz, DMSO) spectrum of compound **52**.

**Fig. S113.** 19F NMR (565 MHz, DMSO) spectrum of compound **52**.

**Fig. S114.** 1H NMR (600 MHz, DMSO) spectrum of compound **53**.

**Fig. S115.** 13C NMR (151 MHz, DMSO) spectrum of compound **53**.

**Fig. S116.** 1H NMR (500 MHz, DMSO) spectrum of compound **54**.

**Fig. S117.** 13C NMR (151 MHz, DMSO) spectrum of compound **54**.

**Fig. S118.** 1H NMR (500 MHz, DMSO) spectrum of compound **55**.

**Fig. S119.** 13C NMR (126 MHz, DMSO) spectrum of compound **55**.

**Fig. S120.** 1H NMR (500 MHz, DMSO) spectrum of compound **56**.

**Fig. S121.** 13C NMR (126 MHz, DMSO) spectrum of compound **56**.

**Fig. S122.** 1H NMR (500 MHz, DMSO) spectrum of compound **57**.

**Fig. S123.** 13C NMR (126 MHz, DMSO) spectrum of compound **57**.

**Fig. S124.** 19F NMR (565 MHz, DMSO) spectrum of compound **57**.

**Fig. S125.** 1H NMR (500 MHz, DMSO) spectrum of compound **58**.

**Fig. S126.** 13C NMR (126 MHz, DMSO) spectrum of compound **58**.

**Fig. S127.** 1H NMR (500 MHz, DMSO) spectrum of compound **59**.

**Fig. S128.** 13C NMR (126 MHz, DMSO) spectrum of compound **59**.

**Fig. S129.** 1H NMR (500 MHz, DMSO) spectrum of compound **60**.

**Fig. S130.** 13C NMR (126 MHz, DMSO) spectrum of compound **60**.

**Fig. S131.** 1H NMR (500 MHz, CDCl3) spectrum of compound **61**.

**Fig. S132.** 13C NMR (126 MHz, CDCl3) spectrum of compound **61**.

**Fig. S133.** 19F NMR (565 MHz, CDCl3) spectrum of compound **61**.

**Fig. S134.** 1H NMR (500 MHz, DMSO) spectrum of compound **62**.

**Fig. S135.** 13C NMR (126 MHz, DMSO) spectrum of compound **62**.

**Fig. S136.** 19F NMR (471 MHz, DMSO) spectrum of compound **62**.

**Fig. S137.** 1H NMR (500 MHz, CDCl3) spectrum of compound **63**.

**Fig. S138.** 13C NMR (126 MHz, CDCl3) spectrum of compound **63**.

**Fig. S139.** 1H NMR (600 MHz, CDCl3) spectrum of compound **64**.

**Fig. S140.** 13C NMR (126 MHz, CDCl3) spectrum of compound **64**.

**Fig. S141.** 1H NMR (600 MHz, DMSO) spectrum of compound **65**.

**Fig. S142.** 13C NMR (151 MHz, DMSO) spectrum of compound **65**.

**Fig. S143.** 1H NMR (500 MHz, DMSO) spectrum of compound **66**.

**Fig. S144.** 13C NMR (151 MHz, DMSO) spectrum of compound **66**.

**Fig. S145.** 1H NMR (500 MHz, DMSO) spectrum of compound **67**.

**Fig. S146.** 13C NMR (151 MHz, DMSO) spectrum of compound **67**.

**Fig. S147.** 1H NMR (500 MHz, CDCl3) spectrum of compound **68**.

**Fig. S148.** 13C NMR (126 MHz, CDCl3) spectrum of compound **68**.

**Fig. S149.** 1H NMR (500 MHz, CDCl3) spectrum of compound **69**.

**Fig. S150.** 13C NMR (126 MHz, CDCl3) spectrum of compound **69**.

**Fig. S151.** 1H NMR (500 MHz, CDCl3) spectrum of compound **S70**.

**Fig. S152.** 13C NMR (126 MHz, CDCl3) spectrum of compound **S70**.

**Fig. S153.** 1H NMR (500 MHz, CDCl3) spectrum of compound **70**.

**Fig. S154.** 13C NMR (126 MHz, CDCl3) spectrum of compound **70**.

**Fig. S155.** 1H NMR (500 MHz, CDCl3) spectrum of compound **S71**.

**Fig. S156.** 13C NMR (126 MHz, CDCl3) spectrum of compound **S71**.

**Fig. S157.** 1H NMR (500 MHz, CDCl3) spectrum of compound **71**.

**Fig. S158.** 13C NMR (126 MHz, CDCl3) spectrum of compound **71**.

**Fig. S159.** 1H NMR (500 MHz, CDCl3) spectrum of compound **S72**.

**Fig. S160.** 13C NMR (126 MHz, CDCl3) spectrum of compound **S72**.

**Fig. S161.** 1H NMR (500 MHz, CDCl3) spectrum of compound **72**.

**Fig. S162.** 13C NMR (151 MHz, CDCl3) spectrum of compound **72**.

**Fig. S163.** 1H NMR (500 MHz, CDCl3) spectrum of compound **S73**.

**Fig. S164.** 13C NMR (126 MHz, CDCl3) spectrum of compound **S73**.

**Fig. S165.** 1H NMR (500 MHz, CDCl3) spectrum of compound **73**.

**Fig. S166.** 13C NMR (126 MHz, CDCl3) spectrum of compound **73**.

**Fig. S167.** 1H NMR (500 MHz, CDCl3) spectrum of compound **S74**.

**Fig. S168.** 13C NMR (126 MHz, CDCl3) spectrum of compound **S74**.

**Fig. S169.** 1H NMR (500 MHz, CDCl3) spectrum of compound **74**.

**Fig. S170.** 13C NMR (126 MHz, CDCl3) spectrum of compound **74**.

**Fig. S171.** 1H NMR (600 MHz, CDCl3) spectrum of compound **75**.

**Fig. S172.** 13C NMR (126 MHz, CDCl3) spectrum of compound **75**.

**Fig. S173.** 1H NMR (600 MHz, CDCl3) spectrum of compound **76**.

**Fig. S174.** 13C NMR (126 MHz, CDCl3) spectrum of compound **76**.

**Fig. S175.** 1H NMR (500 MHz, CDCl3) spectrum of compound **77**.

**Fig. S176.** 13C NMR (126 MHz, CDCl3) spectrum of compound **77**.

**Fig. S177.** 1H NMR (500 MHz, CDCl3) spectrum of compound **78**.

**Fig. S178.** 13C NMR (151 MHz, CDCl3) spectrum of compound **78**.

1. **References**
2. Urbano, J., Belderraín, T. R., Nicasio, M. C., Trofimenko, S., Díaz-Requejo, M. M. & Pérez, P. J. Functionalization of primary carbon−hydrogen bonds of alkanes by carbene insertion with a silver-based catalyst. *Organometallics* **24**, 1528 – 1532 (2005).
3. Dias, H.R. & Jin, W. Monomeric indium(I) and silver(I) complexes of a polyfluorinated tris(pyrazolyl)borate. *Inorg. Chem.* **35**, 267 – 268 (1996).
4. Tsuji, T., Tanaka, T., Tanaka, T., Yazaki, R. & Ohshima, T. Catalytic aerobic cross- dehydrogenative coupling of azlactones en route to α,α-disubstituted α-amino acids. *Org. Lett.* **22**, 4164 – 4170 (2020).
5. Smulik, J. A. & Vedejs, E. Improved reagent for electrophilic amination of stabilized carbanions. *Org. Lett.* **5**, 4187 – 4190 (2003).
6. Lin, H., Wang, C., Bannister, T. D. & Kamenecka, T. M. Site-selective γ-C(sp3)−H and γ-C(sp2)−H arylation of free amino esters promoted by a catalytic transient directing group. *Chem. –A Eur. J.* **24**, 9535 – 9541 (2018).
7. Kolar, P. & Tišler, M. Heterocyclic amino acids as synthons. Reactions with dicarbonyl compounds. *J. Heterocycl. Chem.* **30**, 1253 – 1260 (1993).
8. Lin, L., Fukagawa, S., Sekine, D., Tomita, E., Yoshino, T. & Matsunaga, S. Chiral carboxylic acid enabled achiral rhodium(III)-catalyzed enantioselective C−H functionalization. *Angew. Chem. Int. Ed.* **57**, 12048 – 12052 (2018).
9. Thurow, S., Fernandes, A. A. G., Quevedo-Acosta, Y., de Oliveira, M.F., de Oliveira, M.G. & Jurberg, I.D. Preparation of organic nitrates from aryldiazoacetates and Fe(NO3)3·9H2O. O*rg. Lett.* **21**, 6909 – 6913 (2019).
10. Lu, J., Li, L., He, X. K., Xu, G. Y. & Xuan, J. Visible light‐promoted sulfoxonium ylides synthesis from aryl diazoacetates and sulfoxides. *Chin. J. Chem.* **39**, 1646 – 1650. (2021).
11. Yang, L. L., Evans, D., Xu, B., Li, W.-T., Li, M.-L., Zhu, S.-F., Houk, K.N. & Zhou, Q.-L. Enantioselective diarylcarbene insertion into Si–H bonds Induced by electronic properties of the carbenes. *J. Am. Chem. Soc*. **142**, 12394 – 12399 (2020).
12. Nicolle, S. M. & Moody, C. J. Potassium *N*-Iodo *p*-toluenesulfonamide (TsNIK, Iodamine-T): A new reagent for the oxidation of hydrazones to diazo compounds. *Chem. Eur. J.* **20**, 4420 – 4425 (2014).
13. Roberts, E. CII. Preparation of potassium & sodium arylsulphoniodoamides. *J. Chem. Soc., Trans.* **123**, 849 – 853 (1923).
14. Coleman A. C., Areephong, J., Vicario, J., Meetsma, A., Browne, W. R. & Feringa, B. L. In situ generation of wavelength-shifting donor–acceptor mixed-monolayer-modified surfaces. *Angew. Chem. Int. Ed*.**49**, 6580 – 6584 (2010).
15. Liu, Z., Babu, K.R., Wang, F., Yang, Y. & Bi, X. Influence of sulfonyl substituents on the decomposition of N-sulfonylhydrazones at room temperature. *Org. Chem. Front.* *6*, 121 – 124.
16. Frisch, M. J. Mennucci, B., Petersson, G.A., et al. Gaussian 16 Revision C.01, Gaussian, Inc., Wallingford CT, (2019).
17. Becke, A. D. Density‐functional thermochemistry. III. The role of exact exchange. *J. Chem. Phys.* **98**, 5648−5652 (1993).
18. Perdew, J. P. & Wang, Y. Accurate and simple analytic representation of the electron-gas correlation energy*. Phys. Rev. B* **45**, 13244 – 13249 (1992).
19. Grimme, S., Ehrlich, S. & Goerigk, L. Effect of the damping function in dispersion corrected density functional theory. *J. Comp. Chem.* **32**, 1456 – 1465 (2011).
20. Küchle, W., Dolg, M., Stoll, H. & Preuss, H. Energy‐adjusted pseudopotentials for the actinides. Parameter sets and test calculations for thorium and thorium monoxide. J*. Chem. Phys.* **100**, 7535 – 7542 (1994).
21. Cao, X., Dolg, M. & Stoll, H. Valence basis sets for relativistic energy-consistent small-core actinide pseudopotentials. *J. Chem. Phys.* **118**, 487 – 496 (2003).
22. McLean, A. D. & Chandler, G. S. Contracted Gaussian basis sets for molecular calculations. I. Second row atoms, *Z* = 11–18. *J. Chem. Phys.* **72**, 5639 – 5648 (1980).
23. Hehre, W. J., Ditchfield, R. & Pople, J. A. Self – consistent molecular orbital methods. XII. Further extensions of gaussian – type basis sets for use in molecular orbital studies of organic molecules. *J. Chem. Phys.* **56**, 2257 – 2261 (1972).
24. Fukui, K. Formulation of the reaction coordinate. *J. Phys. Chem.* **74**, 4161 – 4163 (1970).
25. Fukui, K. The path of chemical reactions - the IRC approach. *Acc. Chem. Res.* **14**, 363 – 368 (1981).
26. Zhao, Y. & Truhlar, D. G.. The M06 suite of density functionals for main group thermochemistry, thermochemical kinetics, noncovalent interactions, excited states, and transition elements: two new functionals and systematic testing of four M06-class functionals and 12 other functionals. *Theor. Chem. Acc.* **120**, 215 – 241 (2008).
27. Marenich, A. V., Cramer, C.J. & Truhlar, D. G. Universal solvation model based on solute electron density and on a continuum model of the solvent defined by the bulk dielectric constant and atomic surface tensions. *J. Phys. Chem. B*, **113**, 6378 – 6396 (2009).
28. Yang, Y.-F., Cheng, G.-J., Liu, P., Leow, D., Sun, T.-Y., Chen, P., Zhang, X., Yu, J.-Q., Wu, Y.-D. & Houk, K.N.. Palladium-catalyzed meta-selective C–H bond activation with a nitrile-containing template: computational study on mechanism and origins of selectivity. *J. Am. Chem. Soc.* **136**, 344 – 355 (2014).
29. Legault, C. Y. CYLview, 1.0b; Université de Sherbrooke: Canada, (2009).
30. Lu, T. & Chen, F. Multiwfn: A multifunctional wavefunction analyzer. *J. Comput. Chem.* **33**, 580−592 (2012).
